# Supplementary material for: Crosstalk between repair pathways elicits double-strand breaks in alkylated DNA and implications for the action of temozolomide
Source: eLife journal article supplement (doi:10.7554/elife.69544), 2021-07-08
Supplement: supp [file elife_poa_e69544_Figure_1_figure_supplement_1.pdf › elife_poa_e69544_Figure_1_figure_supplement_1.pdf]

A.

| 0.65 ml tube                | DNA0          | MMS: 10mM<br>final   | MNU: 1mM<br>final   | ENU: 30mM<br>final   |
|-----------------------------|---------------|----------------------|---------------------|----------------------|
| pBR322 1ug in<br>CE buffer  | 90ul          | 90ul                 | 90ul                | 90ul                 |
| Alkylating agent<br>in DMSO | 10ul DMSO     | 10ul MMS at<br>100mM | 10ul MNU at<br>10mM | 10ul ENU at<br>300mM |
| Temp / time                 | 50°C / 40 min | 40°C / 30min         | 50°C / 16 min       | 50°C / 40 min        |

Alkylation reaction conditions leading to an average of one N- alkylation adduct every 500 nt.

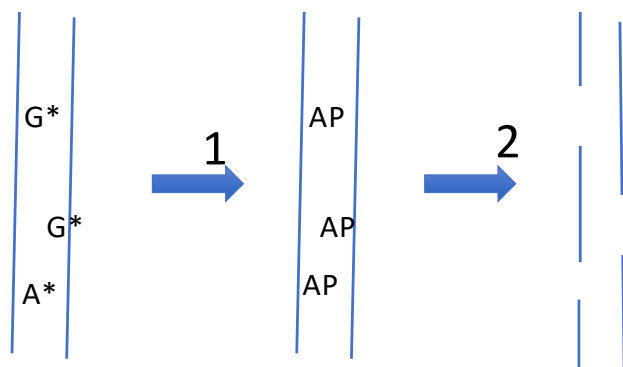

Cleavage at 7mG (G\*) and 3mA adducts (A\*):

1. Heat-induced depurination at pH7 (90°C, 15')
2. Heat-induced strand cleavage at pH13 (90°C, 30')

500 nt

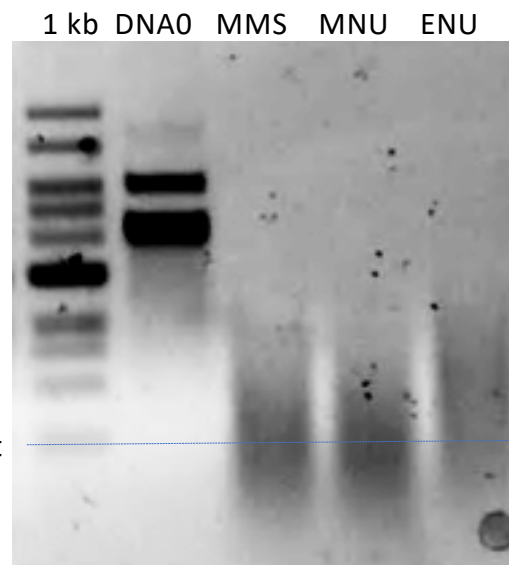

B.

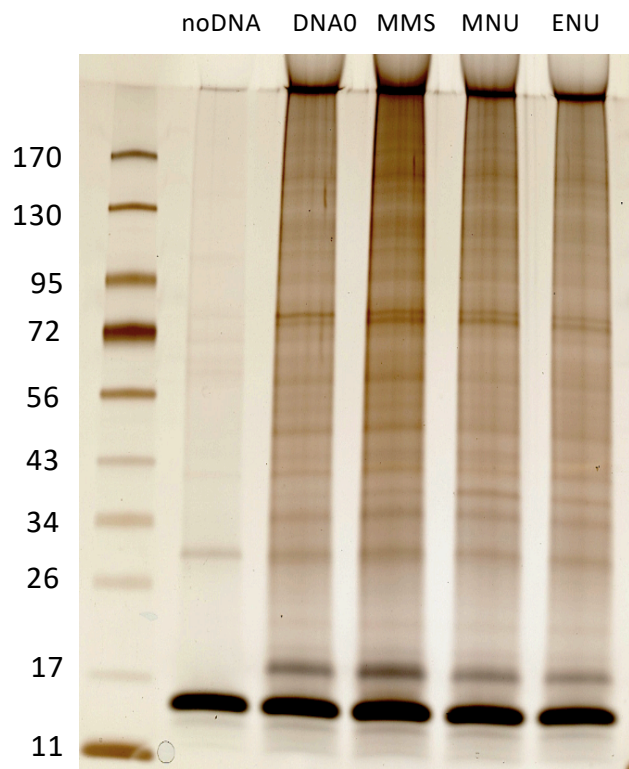

C.

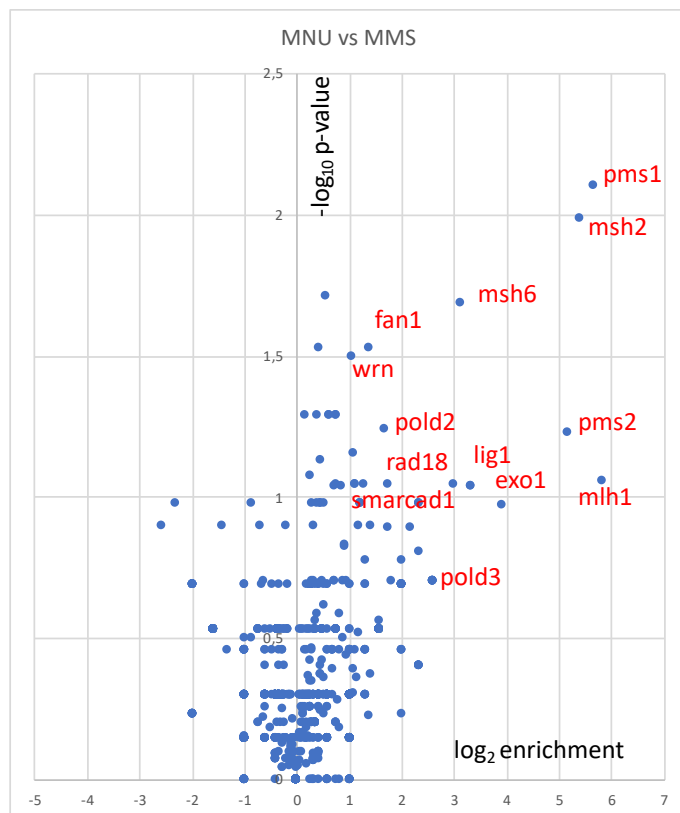

Figure 1-figure supplement 1
