# Supplementary material for: Crosstalk between repair pathways elicits double-strand breaks in alkylated DNA and implications for the action of temozolomide
Source: eLife journal article supplement (doi:10.7554/elife.69544), 2021-07-08
Supplement: supp [file Figure 1-figure supplement1 source dataC.xlsx]

## Sheet: Xenbase
								total spectral counts
Protein	Group ID	Collapsed?	Unique Peptides	Razor Peptides	Gene	Description	SeqLen	RF_A0	RF_A1	RF_A2	RF_B0	RF_B1	RF_B2	RF_C0	RF_C1	RF_C2	RF_D0	RF_D1	RF_D2
mi|Xelaev18014299m.g|	0	C	0	2	olig2.S	olig2.S	360	0	0	0	1	0	0	0	0	0	1	0	0
mi|Xelaev18011496m.g|	0		0	0	olig2.L	olig2.L	359	0	0	0	1	0	0	0	0	0	1	0	0
mi|Xelaev18007309m.g|	1	C	18	219	supt16h.L	supt16h.L	1036	2	27	33	6	27	25	5	27	29	4	30	22
mi|Xelaev18010282m.g|	1	C	103	0	supt16h.S	supt16h.S	1035	3	37	50	7	39	33	5	39	37	5	38	29
mi|Xelaev18018889m.g|	2	C	57	88	brd4.L	brd4.L	1366	0	19	24	0	20	16	0	19	20	0	18	9
mi|Xelaev18020115m.g|	2	C	74	0	brd4.S	brd4.S	1351	0	22	30	0	21	16	0	23	21	0	22	7
mi|Xelaev18041566m.g|	2	C	1	4	brd3.S	brd3.S	783	0	3	4	0	2	2	0	2	3	0	0	1
mi|Xelaev18038338m.g|	2		0	0	brd3.L	brd3.L	671	0	3	3	0	2	2	0	2	3	0	0	1
mi|Xelaev18025397m.g|	2		0	0	loc733182.S	loc733182.S	934	0	2	3	0	3	2	0	3	2	0	2	0
mi|Xelaev18042427m.g|	2		0	0	brd2.S	brd2.S	777	0	2	3	0	3	2	0	3	2	0	2	0
mi|Xelaev18018138m.g|	3	C	27	0	fan1.L	fan1.L	1015	0	0	1	0	3	2	0	6	7	0	5	3
mi|Xelaev18043403m.g|	4		0	0	cse1l.L	cse1l.L	1020	0	8	7	0	5	6	0	7	7	0	7	1
mi|Xelaev18046130m.g|	4	C	11	48	cse1l.S	cse1l.S	971	0	9	9	0	6	7	0	8	9	0	9	2
mi|Xelaev18043734m.g|	5	C	98	0	lig3.L	lig3.L	988	0	12	14	0	13	13	0	13	14	0	10	9
mi|Xelaev18025786m.g|	6	C	2	103	rad54l2.S	rad54l2.S	1396	0	12	17	0	15	11	0	13	15	0	12	10
mi|Xelaev18023844m.g|	6	C	29	0	rad54l2.L	rad54l2.L	1393	0	16	18	0	20	14	0	17	19	0	17	11
mi|Xelaev18045461m.g|	7	C	1	0	c7orf26.L	c7orf26.L	450	0	0	1	0	0	0	0	0	0	0	0	0
mi|Xelaev18036125m.g|	8	C	16	48	ruvbl2.L	ruvbl2.L	462	0	8	10	0	8	8	0	8	9	0	8	5
mi|Xelaev18037847m.g|	8	C	1	0	ruvbl2.S	ruvbl2.S	423	0	6	7	0	7	6	0	6	7	0	6	4
mi|Xelaev18027257m.g|	9	C	1	0	mms22l.L	mms22l.L	1229	0	0	0	0	0	0	0	1	0	0	0	0
mi|Xelaev18008044m.g|	10	C	0	22	chd1.L	chd1.L	1804	0	4	6	0	4	3	0	4	4	0	4	1
mi|Xelaev18010800m.g|	10		0	0	chd1.S	chd1.S	1793	0	4	6	0	4	3	0	4	4	0	4	1
mi|Xelaev18010281m.g|	10	C	88	75	chd8.S	chd8.S	2340	0	29	38	0	31	20	0	21	21	0	19	12
mi|Xelaev18007308m.g|	10	C	90	0	chd8.L	chd8.L	2337	0	28	37	0	31	21	0	22	26	0	19	9
mi|Xelaev18033747m.g|	10	C	0	31	chd7-like.S	chd7-like.S	2995	0	4	6	0	4	3	0	5	3	0	3	3
mi|Xelaev18032051m.g|	10		0	0	chd7-like.L	chd7-like.L	2975	0	4	6	0	4	3	0	5	3	0	3	3
mi|Xelaev18018382m.g|	10		0	0	chd2.L	chd2.L	1827	0	2	2	0	3	2	0	2	2	0	3	1
mi|Xelaev18046632m.g|	10		0	0	chd6.S	chd6.S	2682	0	3	2	0	2	2	0	2	2	0	2	2
mi|Xelaev18043975m.g|	10		0	0	chd6.L	chd6.L	2674	0	3	2	0	2	2	0	2	2	0	2	2
mi|Xelaev18022507m.g|	10		0	0	chd9.L	chd9.L	2884	0	3	3	0	3	3	0	3	3	0	3	3
mi|Xelaev18030524m.g|	11	C	12	110	smarcc1.L	smarcc1.L	1201	0	15	23	0	16	14	0	16	15	0	13	10
mi|Xelaev18032733m.g|	11	C	5	0	smarcc1.S	smarcc1.S	1171	0	16	22	0	14	13	0	14	14	0	12	10
mi|Xelaev18013362m.g|	11		0	0	smarcc2.L	smarcc2.L	1207	0	5	6	0	6	4	0	4	4	0	3	4
mi|Xelaev18015860m.g|	11		0	0	smarcc2.S	smarcc2.S	1175	0	5	6	0	6	4	0	4	4	0	3	4
mi|Xelaev18005215m.g|	12	C	57	0	rfc1.L	rfc1.L	1147	0	6	7	0	8	6	0	12	11	0	5	2
mi|Xelaev18004406m.g|	13	C	0	11	rps25.S	rps25.S	125	0	2	1	1	2	1	0	1	1	0	2	0
mi|Xelaev18035425m.g|	13		0	0	rps25.L	rps25.L	125	0	2	1	1	2	1	0	1	1	0	2	0
mi|Xelaev18023511m.g|	14	C	41	0	atf7ip.L	atf7ip.L	1254	0	6	9	0	6	3	0	6	5	0	4	2
mi|Xelaev18043864m.g|	15	C	15	8	dnttip1.L	dnttip1.L	309	0	3	3	0	3	3	0	3	3	0	3	2
mi|Xelaev18046529m.g|	15	C	25	0	dnttip1.S	dnttip1.S	306	0	3	6	0	4	4	0	6	4	0	3	3
mi|Xelaev18023421m.g|	16	C	2	0	dbt.L	dbt.L	492	0	0	1	0	0	0	0	1	0	0	0	0
mi|Xelaev18028694m.g|	17	C	4	0	nsl1.S	nsl1.S	826	0	0	1	0	1	1	0	1	0	0	0	0
mi|Xelaev18018353m.g|	18	C	176	0	fanci.L	fanci.L	1337	0	20	19	0	23	22	0	23	24	0	26	19
mi|Xelaev18031132m.g|	19	C	137	0	topbp1.L	topbp1.L	1573	0	14	19	0	20	14	0	20	21	0	19	10
mi|Xelaev18038687m.g|	20	C	167	13	atrx.L	atrx.L	2276	0	23	27	0	21	19	0	23	23	0	25	19
mi|Xelaev18042018m.g|	20		0	0	atrx-like.S	atrx-like.S	1187	0	2	2	0	2	1	0	2	1	0	1	2
mi|Xelaev18034423m.g|	21	C	30	100	chd4.L	chd4.L	1893	0	21	20	0	18	15	0	14	18	0	15	9
mi|Xelaev18036728m.g|	21	C	2	0	chd4.S	chd4.S	1876	0	18	16	0	14	13	0	10	13	0	12	6
mi|Xelaev18035768m.g|	21		0	0	chd5-like.2.L	chd5-like.2.L	1949	0	6	6	0	4	5	0	2	4	0	4	3
mi|Xelaev18037586m.g|	21		0	0	chd5-like.2.S	chd5-like.2.S	1927	0	6	6	0	4	5	0	2	4	0	4	3
mi|Xelaev18019318m.g|	21		0	0	chd3.L	chd3.L	2034	0	6	5	0	4	3	0	2	5	0	3	2
mi|Xelaev18000914m.g|	21		0	0	chd3.S	chd3.S	1957	0	6	5	0	4	3	0	2	5	0	3	2
mi|Xelaev18038656m.g|	22	C	46	0	zmym3.L	zmym3.L	1307	0	7	7	0	7	3	0	5	7	0	6	4
sp|P02533|K1C14_HUMAN_contaminant	23	C	69	24	Keratin, type I cytoskeletal 14 OS=Homo sapiens GN=KRT14 PE=1 SV=4	Keratin, type I cytoskeletal 14 OS=Homo sapiens GN=KRT14 PE=1 SV=4	472	4	17	15	19	16	15	13	18	32	10	29	14
sp|P13645|K1C10_HUMAN_contaminant	23	C	196	84	Keratin, type I cytoskeletal 10 OS=Homo sapiens GN=KRT10 PE=1 SV=6	Keratin, type I cytoskeletal 10 OS=Homo sapiens GN=KRT10 PE=1 SV=6	584	16	21	27	26	25	22	24	25	28	23	30	21
sp|P08779|K1C16_HUMAN_contaminant	23	C	52	76	Keratin, type I cytoskeletal 16 OS=Homo sapiens GN=KRT16 PE=1 SV=4	Keratin, type I cytoskeletal 16 OS=Homo sapiens GN=KRT16 PE=1 SV=4	473	3	18	9	18	17	13	9	16	27	9	19	10
sp|P13646|K1C13_HUMAN_contaminant	23	C	15	3	Keratin, type I cytoskeletal 13 OS=Homo sapiens GN=KRT13 PE=1 SV=4	Keratin, type I cytoskeletal 13 OS=Homo sapiens GN=KRT13 PE=1 SV=4	458	4	6	6	7	6	6	5	8	15	8	11	8
sp|P19012|K1C15_HUMAN_contaminant	23		0	0	Keratin, type I cytoskeletal 15 OS=Homo sapiens GN=KRT15 PE=1 SV=3	Keratin, type I cytoskeletal 15 OS=Homo sapiens GN=KRT15 PE=1 SV=3	456	3	6	6	7	6	5	4	6	9	4	7	5
sp|Q04695|K1C17_HUMAN_contaminant	23	C	25	1	Keratin, type I cytoskeletal 17 OS=Homo sapiens GN=KRT17 PE=1 SV=2	Keratin, type I cytoskeletal 17 OS=Homo sapiens GN=KRT17 PE=1 SV=2	432	2	8	5	9	9	8	4	14	18	6	16	6
mi|Xelaev18045881m.g|	23		0	0	krt19.S	krt19.S	434	1	2	2	2	2	1	2	3	2	2	4	2
sp|Q7Z3Y7|K1C28_HUMAN_contaminant	23		0	0	Keratin, type I cytoskeletal 28 OS=Homo sapiens GN=KRT28 PE=1 SV=2	Keratin, type I cytoskeletal 28 OS=Homo sapiens GN=KRT28 PE=1 SV=2	464	2	3	3	4	4	3	2	3	3	4	4	3
sp|Q7Z3Y8|K1C27_HUMAN_contaminant	23		0	0	Keratin, type I cytoskeletal 27 OS=Homo sapiens GN=KRT27 PE=1 SV=2	Keratin, type I cytoskeletal 27 OS=Homo sapiens GN=KRT27 PE=1 SV=2	459	1	2	2	3	3	2	1	2	2	3	3	2
sp|Q7Z3Z0|K1C25_HUMAN_contaminant	23		0	0	Keratin, type I cytoskeletal 25 OS=Homo sapiens GN=KRT25 PE=1 SV=1	Keratin, type I cytoskeletal 25 OS=Homo sapiens GN=KRT25 PE=1 SV=1	450	1	2	2	3	3	2	1	2	2	3	3	2
sp|P35527|K1C9_HUMAN_contaminant	23	C	284	8	Keratin, type I cytoskeletal 9 OS=Homo sapiens GN=KRT9 PE=1 SV=3	Keratin, type I cytoskeletal 9 OS=Homo sapiens GN=KRT9 PE=1 SV=3	623	15	28	26	36	24	24	24	19	26	17	30	23
mi|Xelaev18045880m.g|	23		0	0	loc100490729.S	loc100490729.S	454	1	1	1	1	1	1	1	0	1	0	1	1
sp|P08727|K1C19_HUMAN_contaminant	23		0	0	Keratin, type I cytoskeletal 19 OS=Homo sapiens GN=KRT19 PE=1 SV=4	Keratin, type I cytoskeletal 19 OS=Homo sapiens GN=KRT19 PE=1 SV=4	400	2	4	4	6	5	4	4	4	6	2	8	4
mi|Xelaev18043124m.g|	23		0	0	krt24-like.L	krt24-like.L	497	0	0	0	0	0	0	0	1	1	0	1	0
mi|Xelaev18045879m.g|	23		0	0	krt17.S	krt17.S	458	2	3	3	4	3	3	2	6	7	2	6	3
mi|Xelaev18043108m.g|	23		0	0	krt17.L	krt17.L	452	2	3	3	4	3	3	2	6	7	2	6	3
mi|Xelaev18043110m.g|	23		0	0	krt19.L	krt19.L	412	1	2	2	2	2	1	2	1	1	1	3	2
sp|Q2M2I5|K1C24_HUMAN_contaminant	23		0	0	Keratin, type I cytoskeletal 24 OS=Homo sapiens GN=KRT24 PE=1 SV=1	Keratin, type I cytoskeletal 24 OS=Homo sapiens GN=KRT24 PE=1 SV=1	525	2	2	2	2	2	1	2	1	2	2	2	2
sp|O76013|KRT36_HUMAN_contaminant	23		0	0	Keratin, type I cuticular Ha6 OS=Homo sapiens GN=KRT36 PE=1 SV=1	Keratin, type I cuticular Ha6 OS=Homo sapiens GN=KRT36 PE=1 SV=1	467	1	1	1	1	1	1	1	0	0	0	1	1
sp|O76015|KRT38_HUMAN_contaminant	23		0	0	Keratin, type I cuticular Ha8 OS=Homo sapiens GN=KRT38 PE=2 SV=3	Keratin, type I cuticular Ha8 OS=Homo sapiens GN=KRT38 PE=2 SV=3	456	1	1	1	1	1	1	1	1	1	1	1	1
sp|Q92764|KRT35_HUMAN_contaminant	23		0	0	Keratin, type I cuticular Ha5 OS=Homo sapiens GN=KRT35 PE=2 SV=5	Keratin, type I cuticular Ha5 OS=Homo sapiens GN=KRT35 PE=2 SV=5	455	1	1	1	1	1	1	1	0	0	0	1	1
sp|O76014|KRT37_HUMAN_contaminant	23		0	0	Keratin, type I cuticular Ha7 OS=Homo sapiens GN=KRT37 PE=2 SV=3	Keratin, type I cuticular Ha7 OS=Homo sapiens GN=KRT37 PE=2 SV=3	449	1	1	1	1	1	1	1	1	1	1	1	1
sp|Q14532|K1H2_HUMAN_contaminant	23		0	0	Keratin, type I cuticular Ha2 OS=Homo sapiens GN=KRT32 PE=1 SV=3	Keratin, type I cuticular Ha2 OS=Homo sapiens GN=KRT32 PE=1 SV=3	448	1	1	1	1	1	1	1	0	0	0	1	1
sp|P05783|K1C18_HUMAN_contaminant	23		0	0	Keratin, type I cytoskeletal 18 OS=Homo sapiens GN=KRT18 PE=1 SV=2	Keratin, type I cytoskeletal 18 OS=Homo sapiens GN=KRT18 PE=1 SV=2	430	1	1	1	1	1	1	1	0	0	0	1	1
sp|Q15323|K1H1_HUMAN_contaminant	23		0	0	Keratin, type I cuticular Ha1 OS=Homo sapiens GN=KRT31 PE=2 SV=3	Keratin, type I cuticular Ha1 OS=Homo sapiens GN=KRT31 PE=2 SV=3	416	1	1	1	1	1	1	1	0	1	0	1	1
sp|Q14525|KT33B_HUMAN_contaminant	23		0	0	Keratin, type I cuticular Ha3-II OS=Homo sapiens GN=KRT33B PE=2 SV=3	Keratin, type I cuticular Ha3-II OS=Homo sapiens GN=KRT33B PE=2 SV=3	404	1	1	1	1	1	1	1	0	1	0	1	1
mi|Xelaev18016071m.g|	23		0	0	krt18.S	krt18.S	524	1	1	1	1	1	1	1	0	0	0	1	1
mi|Xelaev18043121m.g|	23		0	0	loc100486967.L	loc100486967.L	522	2	4	4	4	4	2	4	2	4	4	4	4
mi|Xelaev18045890m.g|	23		0	0	loc100486967.S	loc100486967.S	491	2	4	4	4	4	2	4	2	4	4	4	4
mi|Xelaev18043109m.g|	23		0	0	loc100490729.L	loc100490729.L	488	1	1	1	1	1	1	1	0	0	0	1	1
mi|Xelaev18045889m.g|	23		0	0	krt12.S	krt12.S	454	1	2	2	2	2	2	1	2	4	1	2	1
mi|Xelaev18043120m.g|	23		0	0	krt12.L	krt12.L	452	2	4	4	4	4	3	3	3	7	3	4	3
mi|Xelaev18043119m.g|	23		0	0	loc549413.L	loc549413.L	437	1	1	1	1	1	1	1	1	2	1	1	1
mi|Xelaev18013609m.g|	23		0	0	krt18.L	krt18.L	436	1	1	1	1	1	1	1	0	0	0	1	1
mi|Xelaev18045888m.g|	23		0	0	loc549413.S	loc549413.S	435	2	2	3	3	2	1	2	3	2	2	2	3
mi|Xelaev18043117m.g|	23		0	0	krt16.L	krt16.L	424	1	2	2	2	2	2	1	1	2	0	2	1
mi|Xelaev18045886m.g|	23		0	0	krt16.S	krt16.S	423	1	1	1	1	1	1	1	0	0	0	1	1
sp|Q99456|K1C12_HUMAN_contaminant	23		0	0	Keratin, type I cytoskeletal 12 OS=Homo sapiens GN=KRT12 PE=1 SV=1	Keratin, type I cytoskeletal 12 OS=Homo sapiens GN=KRT12 PE=1 SV=1	494	0	1	1	1	1	0	1	0	0	1	1	1
mi|Xelaev18043122m.g|	23	C	3	0	Xetrov90028522m.L	Xetrov90028522m.L	490	0	1	1	1	2	0	1	0	0	1	3	1
mi|Xelaev18045894m.g|	23		0	0	Xelaev18045894m.g	Xelaev18045894m.g	463	0	1	1	1	1	0	1	0	0	1	1	1
mi|Xelaev18043129m.g|	23		0	0	Xelaev18043129m.g	Xelaev18043129m.g	459	0	1	1	1	1	0	1	0	0	1	1	1
mi|Xelaev18045893m.g|	23		0	0	loc100158585.S	loc100158585.S	456	0	1	1	1	1	0	1	0	0	1	1	1
mi|Xelaev18043128m.g|	23		0	0	Xelaev18043128m.g	Xelaev18043128m.g	414	0	1	1	1	1	0	1	0	0	1	1	1
sp|O76011|KRT34_HUMAN_contaminant	23		0	0	Keratin, type I cuticular Ha4 OS=Homo sapiens GN=KRT34 PE=2 SV=2	Keratin, type I cuticular Ha4 OS=Homo sapiens GN=KRT34 PE=2 SV=2	436	0	0	0	0	0	0	0	0	1	0	0	0
sp|Q6A162|K1C40_HUMAN_contaminant	23		0	0	Keratin, type I cytoskeletal 40 OS=Homo sapiens GN=KRT40 PE=1 SV=2	Keratin, type I cytoskeletal 40 OS=Homo sapiens GN=KRT40 PE=1 SV=2	431	0	0	0	0	0	0	0	0	1	0	0	0
sp|P35900|K1C20_HUMAN_contaminant	23		0	0	Keratin, type I cytoskeletal 20 OS=Homo sapiens GN=KRT20 PE=1 SV=1	Keratin, type I cytoskeletal 20 OS=Homo sapiens GN=KRT20 PE=1 SV=1	424	1	2	2	3	2	2	1	4	6	1	3	2
sp|Q9C075|K1C23_HUMAN_contaminant	23		0	0	Keratin, type I cytoskeletal 23 OS=Homo sapiens GN=KRT23 PE=1 SV=2	Keratin, type I cytoskeletal 23 OS=Homo sapiens GN=KRT23 PE=1 SV=2	422	0	0	0	0	0	0	0	0	1	0	0	0
sp|O76009|KT33A_HUMAN_contaminant	23		0	0	Keratin, type I cuticular Ha3-I OS=Homo sapiens GN=KRT33A PE=2 SV=2	Keratin, type I cuticular Ha3-I OS=Homo sapiens GN=KRT33A PE=2 SV=2	404	0	0	0	0	0	0	0	0	1	0	0	0
mi|Xelaev18045884m.g|	23		0	0	loc100491563.S	loc100491563.S	417	0	0	0	0	0	0	0	0	1	0	0	0
mi|Xelaev18043115m.g|	23		0	0	loc100491563.L	loc100491563.L	417	0	0	0	0	0	0	0	0	1	0	0	0
sp|Q7Z3Y9|K1C26_HUMAN_contaminant	23		0	0	Keratin, type I cytoskeletal 26 OS=Homo sapiens GN=KRT26 PE=1 SV=2	Keratin, type I cytoskeletal 26 OS=Homo sapiens GN=KRT26 PE=1 SV=2	468	0	1	1	2	2	1	0	1	1	2	2	1
mi|Xelaev18039699m.g|	24	C	22	47	hsp90aa1.1.L	hsp90aa1.1.L	729	4	7	4	7	6	8	5	6	5	4	5	8
mi|Xelaev18028538m.g|	24		0	0	hsp90ab1.S	hsp90ab1.S	722	5	6	2	8	5	8	5	7	6	5	6	9
mi|Xelaev18026411m.g|	24	C	2	25	hsp90ab1.L	hsp90ab1.L	634	4	6	2	7	5	8	4	7	6	5	7	8
mi|Xelaev18017384m.g|	24		0	0	hsp90b1.L	hsp90b1.L	843	0	1	0	1	1	1	1	1	1	0	1	1
mi|Xelaev18021302m.g|	24		0	0	hsp90b1.S	hsp90b1.S	666	0	1	0	1	1	1	1	1	1	0	1	1
mi|Xelaev18047705m.g|	24		0	0	trap1.S	trap1.S	709	0	1	0	1	1	1	0	0	0	0	0	1
mi|Xelaev18023515m.g|	25	C	198	105	ubn2.L	ubn2.L	1386	0	40	51	0	44	35	0	38	38	0	34	23
mi|Xelaev18025533m.g|	25	C	82	0	ubn2.S	ubn2.S	1327	0	24	33	0	29	21	0	22	26	0	20	12
mi|Xelaev18016915m.g|	26	C	0	16	Xelaev18016915m.g	Xelaev18016915m.g	151	0	2	2	0	1	2	1	2	1	1	2	2
mi|Xelaev18020043m.g|	26		0	0	Xelaev18020043m.g	Xelaev18020043m.g	151	0	2	2	0	1	2	1	2	1	1	2	2
mi|Xelaev18030099m.g|	26		0	0	Xelaev18030099m.g	Xelaev18030099m.g	155	0	2	1	0	1	2	1	2	1	1	2	2
sp|P04259|K2C6B_HUMAN_contaminant	27	C	0	56	Keratin, type II cytoskeletal 6B OS=Homo sapiens GN=KRT6B PE=1 SV=5	Keratin, type II cytoskeletal 6B OS=Homo sapiens GN=KRT6B PE=1 SV=5	564	3	11	10	12	9	10	7	12	13	7	14	9
sp|P48668|K2C6C_HUMAN_contaminant	27		0	0	Keratin, type II cytoskeletal 6C OS=Homo sapiens GN=KRT6C PE=1 SV=3	Keratin, type II cytoskeletal 6C OS=Homo sapiens GN=KRT6C PE=1 SV=3	564	2	11	10	12	10	11	8	13	16	8	16	10
sp|P02538|K2C6A_HUMAN_contaminant	27	C	12	22	Keratin, type II cytoskeletal 6A OS=Homo sapiens GN=KRT6A PE=1 SV=3	Keratin, type II cytoskeletal 6A OS=Homo sapiens GN=KRT6A PE=1 SV=3	564	2	11	9	12	11	12	7	15	16	7	17	10
sp|P12035|K2C3_HUMAN_contaminant	27		0	0	Keratin, type II cytoskeletal 3 OS=Homo sapiens GN=KRT3 PE=1 SV=3	Keratin, type II cytoskeletal 3 OS=Homo sapiens GN=KRT3 PE=1 SV=3	628	3	6	6	6	5	6	4	9	11	6	6	5
sp|Q86Y46|K2C73_HUMAN_contaminant	27		0	0	Keratin, type II cytoskeletal 73 OS=Homo sapiens GN=KRT73 PE=1 SV=1	Keratin, type II cytoskeletal 73 OS=Homo sapiens GN=KRT73 PE=1 SV=1	540	0	1	1	0	1	1	1	1	4	1	3	1
sp|P19013|K2C4_HUMAN_contaminant	27	C	22	4	Keratin, type II cytoskeletal 4 OS=Homo sapiens GN=KRT4 PE=1 SV=4	Keratin, type II cytoskeletal 4 OS=Homo sapiens GN=KRT4 PE=1 SV=4	534	0	2	1	2	3	5	2	4	13	1	10	5
sp|Q7RTS7|K2C74_HUMAN_contaminant	27		0	0	Keratin, type II cytoskeletal 74 OS=Homo sapiens GN=KRT74 PE=1 SV=2	Keratin, type II cytoskeletal 74 OS=Homo sapiens GN=KRT74 PE=1 SV=2	529	0	1	1	0	1	1	1	1	4	1	3	1
sp|Q3SY84|K2C71_HUMAN_contaminant	27		0	0	Keratin, type II cytoskeletal 71 OS=Homo sapiens GN=KRT71 PE=1 SV=3	Keratin, type II cytoskeletal 71 OS=Homo sapiens GN=KRT71 PE=1 SV=3	523	0	1	1	0	1	1	1	1	4	1	3	1
sp|Q8N1N4|K2C78_HUMAN_contaminant	27	C	21	0	Keratin, type II cytoskeletal 78 OS=Homo sapiens GN=KRT78 PE=2 SV=2	Keratin, type II cytoskeletal 78 OS=Homo sapiens GN=KRT78 PE=2 SV=2	520	0	1	1	4	0	0	1	4	6	1	6	0
sp|P04264|K2C1_HUMAN_contaminant	27	C	328	85	Keratin, type II cytoskeletal 1 OS=Homo sapiens GN=KRT1 PE=1 SV=6	Keratin, type II cytoskeletal 1 OS=Homo sapiens GN=KRT1 PE=1 SV=6	644	16	32	34	46	30	34	25	41	46	31	48	30
sp|O95678|K2C75_HUMAN_contaminant	27		0	0	Keratin, type II cytoskeletal 75 OS=Homo sapiens GN=KRT75 PE=1 SV=2	Keratin, type II cytoskeletal 75 OS=Homo sapiens GN=KRT75 PE=1 SV=2	551	1	5	4	4	3	6	3	6	5	4	5	5
sp|P13647|K2C5_HUMAN_contaminant	27	C	101	28	Keratin, type II cytoskeletal 5 OS=Homo sapiens GN=KRT5 PE=1 SV=3	Keratin, type II cytoskeletal 5 OS=Homo sapiens GN=KRT5 PE=1 SV=3	590	6	17	10	16	16	14	10	14	20	7	17	11
sp|Q5XKE5|K2C79_HUMAN_contaminant	27	C	3	0	Keratin, type II cytoskeletal 79 OS=Homo sapiens GN=KRT79 PE=1 SV=2	Keratin, type II cytoskeletal 79 OS=Homo sapiens GN=KRT79 PE=1 SV=2	535	3	5	5	5	4	5	2	7	8	4	8	5
sp|P35908|K22E_HUMAN_contaminant	27	C	291	57	Keratin, type II cytoskeletal 2 epidermal OS=Homo sapiens GN=KRT2 PE=1 SV=2	Keratin, type II cytoskeletal 2 epidermal OS=Homo sapiens GN=KRT2 PE=1 SV=2	639	17	33	34	39	33	36	25	42	40	29	41	34
sp|Q01546|K22O_HUMAN_contaminant	27		0	0	Keratin, type II cytoskeletal 2 oral OS=Homo sapiens GN=KRT76 PE=1 SV=2	Keratin, type II cytoskeletal 2 oral OS=Homo sapiens GN=KRT76 PE=1 SV=2	638	3	5	5	6	5	5	2	8	9	4	6	6
sp|Q14CN4|K2C72_HUMAN_contaminant	27	C	0	5	Keratin, type II cytoskeletal 72 OS=Homo sapiens GN=KRT72 PE=1 SV=2	Keratin, type II cytoskeletal 72 OS=Homo sapiens GN=KRT72 PE=1 SV=2	511	0	2	1	0	1	2	0	1	3	0	4	2
mi|Xelaev18013621m.g|	27		0	0	Xelaev18013621m.g	Xelaev18013621m.g	772	0	3	2	1	1	3	0	2	3	1	4	2
mi|Xelaev18013619m.g|	27		0	0	krt5.6.L	krt5.6.L	672	0	3	2	1	1	3	0	2	1	1	2	2
mi|Xelaev18016078m.g|	27		0	0	krt5.6.S	krt5.6.S	668	0	3	2	1	1	3	0	2	1	1	2	2
mi|Xelaev18013626m.g|	27		0	0	krt5.7.L	krt5.7.L	513	0	7	4	3	5	7	1	4	4	1	7	3
mi|Xelaev18016082m.g|	27		0	0	krt5.7.S	krt5.7.S	532	2	6	5	4	5	6	1	4	4	2	7	4
sp|P05787|K2C8_HUMAN_contaminant	27		0	0	Keratin, type II cytoskeletal 8 OS=Homo sapiens GN=KRT8 PE=1 SV=7	Keratin, type II cytoskeletal 8 OS=Homo sapiens GN=KRT8 PE=1 SV=7	483	0	4	3	2	3	4	1	3	3	1	4	1
mi|Xelaev18016080m.g|	27		0	0	Xelaev18016080m.g	Xelaev18016080m.g	591	1	4	4	2	3	3	1	5	4	2	4	2
mi|Xelaev18013623m.g|	27		0	0	krt5.3.L	krt5.3.L	522	0	3	2	1	3	3	1	2	3	0	3	1
mi|Xelaev18016081m.g|	27		0	0	krt5.3.S	krt5.3.S	518	0	3	2	1	3	3	1	2	3	0	3	1
mi|Xelaev18013610m.g|	27		0	0	krt8.L	krt8.L	512	0	4	3	2	3	4	1	3	3	1	4	1
mi|Xelaev18016072m.g|	27		0	0	krt8.S	krt8.S	507	0	3	2	1	3	3	1	2	3	0	3	1
sp|P08729|K2C7_HUMAN_contaminant	27		0	0	Keratin, type II cytoskeletal 7 OS=Homo sapiens GN=KRT7 PE=1 SV=5	Keratin, type II cytoskeletal 7 OS=Homo sapiens GN=KRT7 PE=1 SV=5	469	0	2	1	1	2	3	1	1	2	0	3	1
sp|Q9NSB2|KRT84_HUMAN_contaminant	27		0	0	Keratin, type II cuticular Hb4 OS=Homo sapiens GN=KRT84 PE=1 SV=2	Keratin, type II cuticular Hb4 OS=Homo sapiens GN=KRT84 PE=1 SV=2	600	0	1	1	0	1	1	0	1	1	0	1	1
sp|Q7Z794|K2C1B_HUMAN_contaminant	27	C	25	0	Keratin, type II cytoskeletal 1b OS=Homo sapiens GN=KRT77 PE=1 SV=3	Keratin, type II cytoskeletal 1b OS=Homo sapiens GN=KRT77 PE=1 SV=3	578	2	5	5	7	6	5	5	8	9	5	10	5
mi|Xelaev18013620m.g|	27		0	0	krt75.L	krt75.L	489	0	2	1	1	2	3	1	1	2	0	2	1
sp|Q6KB66|K2C80_HUMAN_contaminant	27		0	0	Keratin, type II cytoskeletal 80 OS=Homo sapiens GN=KRT80 PE=1 SV=2	Keratin, type II cytoskeletal 80 OS=Homo sapiens GN=KRT80 PE=1 SV=2	452	0	1	0	1	1	2	1	0	1	0	1	0
mi|Xelaev18046982m.g|	27		0	0	krt8.2.S	krt8.2.S	451	0	1	0	1	1	2	1	0	1	0	1	0
mi|Xelaev18044428m.g|	27		0	0	krt8.2.L	krt8.2.L	451	0	1	0	1	1	2	1	0	1	0	1	0
mi|Xelaev18013622m.g|	27		0	0	Xelaev18013622m.g	Xelaev18013622m.g	341	0	1	0	1	1	2	1	0	1	0	1	0
mi|Xelaev18013616m.g|	27		0	0	Xelaev18013616m.g	Xelaev18013616m.g	525	1	2	2	2	1	2	2	1	2	2	2	1
mi|Xelaev18016076m.g|	27		0	0	Xelaev18016076m.g	Xelaev18016076m.g	517	1	2	2	2	1	2	2	1	2	2	2	1
mi|Xelaev18016077m.g|	27		0	0	loc100490994.S	loc100490994.S	509	1	2	2	2	1	2	2	1	2	2	2	1
mi|Xelaev18013618m.g|	27		0	0	loc100490994.L	loc100490994.L	295	1	1	1	1	1	1	1	1	1	1	1	1
mi|Xelaev18016074m.g|	27		0	0	Xelaev18016074m.g	Xelaev18016074m.g	617	0	1	1	1	0	1	0	1	0	1	2	0
mi|Xelaev18013614m.g|	27		0	0	Xelaev18013614m.g	Xelaev18013614m.g	630	0	1	1	1	0	1	0	1	0	1	1	0
mi|Xelaev18013613m.g|	27		0	0	Xelaev18013613m.g	Xelaev18013613m.g	630	0	1	1	1	0	1	0	1	0	1	1	0
mi|Xelaev18016075m.g|	27		0	0	Xelaev18016075m.g	Xelaev18016075m.g	619	0	1	1	1	0	1	0	1	0	1	1	0
mi|Xelaev18013611m.g|	27		0	0	krt6.L	krt6.L	582	0	1	1	1	0	1	0	1	0	1	1	0
mi|Xelaev18016073m.g|	27		0	0	krt6.S	krt6.S	561	0	1	1	1	0	1	0	1	0	1	1	0
mi|Xelaev18013612m.g|	27		0	0	Xelaev18013612m.g	Xelaev18013612m.g	503	0	1	1	1	0	1	0	1	0	1	1	0
mi|Xelaev18039966m.g|	28	C	0	7	erh.L	erh.L	144	0	1	1	0	1	0	0	1	1	0	1	1
mi|Xelaev18041030m.g|	28		0	0	erh.S	erh.S	126	0	1	1	0	1	0	0	1	1	0	1	1
mi|Xelaev18013714m.g|	29	C	60	0	rfc3.L	rfc3.L	356	0	6	7	0	10	7	0	9	8	0	8	5
mi|Xelaev18014822m.g|	30	C	0	5	mkrn3.S	mkrn3.S	484	0	0	1	0	1	0	0	1	1	0	1	0
mi|Xelaev18012274m.g|	30		0	0	rps10.L	rps10.L	165	0	0	1	0	1	0	0	1	1	0	1	0
mi|Xelaev18037911m.g|	31	C	55	0	pnkp.S	pnkp.S	594	0	5	9	0	6	5	0	9	8	0	6	7
mi|Xelaev18038781m.g|	32	C	2	0	smarca1.L	smarca1.L	1034	0	3	5	0	4	4	0	3	3	0	3	2
mi|Xelaev18000122m.g|	32	C	7	58	smarca5.L	smarca5.L	1047	0	8	16	0	9	5	0	8	8	0	6	5
mi|Xelaev18009263m.g|	32	C	13	0	smarca5.S	smarca5.S	1046	0	7	15	0	13	3	0	8	8	0	5	5
mi|Xelaev18007467m.g|	33	C	16	1	acacb.L	acacb.L	2426	1	2	5	0	0	1	0	2	3	0	2	1
mi|Xelaev18015018m.g|	33		0	0	acaca-like.S	acaca-like.S	2349	1	0	0	0	0	0	0	0	0	0	0	0
mi|Xelaev18012163m.g|	33		0	0	acaca.L	acaca.L	2283	1	0	0	0	0	0	0	0	0	0	0	0
mi|Xelaev18031908m.g|	34	C	37	11	rbbp8.L	rbbp8.L	856	0	6	7	0	8	3	0	7	8	0	5	4
mi|Xelaev18033649m.g|	34		0	0	rbbp8.S	rbbp8.S	846	0	2	2	0	2	1	0	1	1	0	1	1
mi|Xelaev18020338m.g|	35	C	0	51	pcna.S	pcna.S	268	0	5	6	0	6	5	0	7	8	0	7	7
mi|Xelaev18018556m.g|	35		0	0	pcna.L	pcna.L	261	0	5	6	0	6	5	0	7	8	0	7	7
mi|Xelaev18016245m.g|	36	C	4	7	zmym2.S	zmym2.S	1492	0	1	5	0	2	0	0	0	1	0	2	0
mi|Xelaev18013798m.g|	36	C	7	0	zmym2.L	zmym2.L	1324	0	2	3	0	3	0	0	2	1	0	3	0
mi|Xelaev18038019m.g|	37	C	30	32	Xelaev18038019m.g	Xelaev18038019m.g	2715	0	9	15	0	12	5	0	7	7	0	5	2
mi|Xelaev18036460m.g|	37		0	0	Xelaev18036460m.g	Xelaev18036460m.g	2819	0	4	5	0	8	2	0	5	4	0	3	1
sp|P02769|ALBU_BOVIN_contaminant	38	C	241	2	Serum albumin OS=Bos taurus GN=ALB PE=1 SV=4	Serum albumin OS=Bos taurus GN=ALB PE=1 SV=4	607	17	27	37	21	28	23	21	30	33	13	29	26
mi|Xelaev18045604m.g|	38		0	0	ppl.L	ppl.L	1764	0	0	1	0	0	0	0	0	1	0	0	0
sp|P02768|ALBU_HUMAN_contaminant	38	C	21	62	Serum albumin OS=Homo sapiens GN=ALB PE=1 SV=2	Serum albumin OS=Homo sapiens GN=ALB PE=1 SV=2	609	2	6	7	6	6	5	3	7	16	3	14	8
mi|Xelaev18042026m.g|	39	C	0	3	thoc2.S	thoc2.S	1590	0	2	0	0	1	0	0	0	0	0	0	0
mi|Xelaev18038772m.g|	39		0	0	thoc2.L	thoc2.L	1588	0	2	0	0	1	0	0	0	0	0	0	0
mi|Xelaev18008170m.g|	40	C	1	0	polk.L	polk.L	862	0	0	0	0	0	0	0	0	0	0	1	0
mi|Xelaev18015152m.g|	41	C	77	42	sfpq.S	sfpq.S	661	2	12	17	1	15	11	1	16	18	0	16	10
mi|Xelaev18012461m.g|	41	C	7	0	sfpq.L	sfpq.L	660	2	6	6	1	4	5	1	6	6	0	6	6
sp|P15924|DESP_HUMAN_contaminant	42	C	42	7	Desmoplakin OS=Homo sapiens GN=DSP PE=1 SV=3	Desmoplakin OS=Homo sapiens GN=DSP PE=1 SV=3	2871	0	5	3	9	5	6	0	2	9	0	10	0
mi|Xelaev18031618m.g|	42		0	0	dsp.L	dsp.L	2866	0	0	0	0	1	1	0	1	2	0	2	0
mi|Xelaev18033401m.g|	42		0	0	dsp.S	dsp.S	2767	0	0	0	0	1	1	0	1	2	0	2	0
mi|Xelaev18047595m.g|	43		0	0	trrap.S	trrap.S	3838	0	6	10	0	2	3	0	3	5	0	4	0
mi|Xelaev18045289m.g|	43	C	6	33	trrap.L	trrap.L	3828	0	7	14	0	2	4	0	3	5	0	4	0
mi|Xelaev18014054m.g|	44	C	0	8	rps3.L	rps3.L	246	0	2	2	2	0	0	0	0	0	1	0	1
mi|Xelaev18016414m.g|	44		0	0	rps3.S	rps3.S	246	0	2	2	2	0	0	0	0	0	1	0	1
mi|Xelaev18044294m.g|	45	C	39	3	atad5.L	atad5.L	1740	0	4	9	0	6	4	0	5	7	0	5	2
mi|Xelaev18046880m.g|	45		0	0	atad5.S	atad5.S	1731	0	0	0	0	0	1	0	0	1	0	1	0
mi|Xelaev18047784m.g|	46	C	4	8	loc100158433.S	loc100158433.S	756	0	1	4	0	2	1	0	1	1	0	2	0
mi|Xelaev18045549m.g|	46		0	0	loc100158433.L	loc100158433.L	729	0	1	2	0	1	1	0	1	1	0	1	0
mi|Xelaev18027725m.g|	47	C	224	0	atr.L	atr.L	2654	0	20	25	0	30	20	0	38	34	0	31	26
mi|Xelaev18047449m.g|	48	C	1	2	luc7l.S	luc7l.S	325	0	0	0	0	0	0	0	1	0	0	2	0
mi|Xelaev18045078m.g|	48		0	0	luc7l.L	luc7l.L	324	0	0	1	0	0	0	0	1	0	0	1	0
mi|Xelaev18023526m.g|	48	C	0	1	luc7l2.L	luc7l2.L	372	0	0	1	0	0	0	0	0	0	0	0	0
mi|Xelaev18025544m.g|	48		0	0	luc7l2.S	luc7l2.S	322	0	0	1	0	0	0	0	0	0	0	0	0
mi|Xelaev18045444m.g|	49	C	7	0	slx4.L	slx4.L	1773	0	0	1	0	1	0	0	2	3	0	0	0
mi|Xelaev18030208m.g|	50	C	3	0	ints9.S	ints9.S	600	0	0	0	0	0	1	0	0	2	0	0	0
mi|Xelaev18043612m.g|	51	C	0	16	prpf6.L	prpf6.L	972	0	2	6	0	1	0	0	3	1	0	3	0
mi|Xelaev18046338m.g|	51		0	0	prpf6.S	prpf6.S	972	0	2	6	0	1	0	0	3	1	0	3	0
mi|Xelaev18023178m.g|	52	C	73	0	orc1.L	orc1.L	886	0	13	18	0	8	11	0	7	8	0	5	3
sp|Q9NZT1|CALL5_HUMAN_contaminant	53	C	13	0	Calmodulin-like protein 5 OS=Homo sapiens GN=CALML5 PE=1 SV=2	Calmodulin-like protein 5 OS=Homo sapiens GN=CALML5 PE=1 SV=2	146	0	0	0	3	0	1	0	1	4	0	4	0
mi|Xelaev18043845m.g|	54	C	19	0	brca1.L	brca1.L	1582	0	1	2	0	2	0	0	5	4	0	5	0
mi|Xelaev18029372m.g|	55	C	50	6	casp8ap2.S	casp8ap2.S	1788	0	9	13	0	10	6	0	8	6	0	3	1
mi|Xelaev18027276m.g|	55		0	0	casp8ap2.L	casp8ap2.L	1695	0	1	1	0	1	1	0	1	1	0	0	0
mi|Xelaev18015865m.g|	56	C	0	1	pa2g4.S	pa2g4.S	390	0	0	0	0	0	0	1	0	0	0	0	0
mi|Xelaev18013368m.g|	56		0	0	pa2g4.L	pa2g4.L	390	0	0	0	0	0	0	1	0	0	0	0	0
mi|Xelaev18042089m.g|	57	C	2	35	cul4b.S	cul4b.S	866	0	5	6	0	4	2	0	6	6	0	4	4
mi|Xelaev18038717m.g|	57	C	1	0	cul4b.L	cul4b.L	848	0	5	7	0	4	2	0	6	5	0	4	3
mi|Xelaev18015586m.g|	57		0	0	cul4a.S	cul4a.S	753	0	1	1	0	1	1	0	1	1	0	1	1
mi|Xelaev18013053m.g|	57		0	0	cul4a.L	cul4a.L	753	0	1	1	0	1	1	0	1	1	0	1	1
mi|Xelaev18014700m.g|	58	C	0	2	srsf3.S	srsf3.S	220	0	0	1	0	0	0	0	1	0	0	0	0
mi|Xelaev18012019m.g|	58		0	0	srsf3.L	srsf3.L	189	0	0	1	0	0	0	0	1	0	0	0	0
mi|Xelaev18025652m.g|	59	C	0	12	rpl3.S	rpl3.S	403	0	2	3	0	1	1	0	2	2	0	1	0
mi|Xelaev18023660m.g|	59		0	0	rpl3.L	rpl3.L	403	0	2	3	0	1	1	0	2	2	0	1	0
mi|Xelaev18012050m.g|	60	C	34	36	rpa2.L	rpa2.L	276	0	9	8	0	9	7	0	10	10	0	11	6
mi|Xelaev18015126m.g|	60	C	6	0	rpa2.S	rpa2.S	274	0	4	6	0	8	4	0	6	6	0	6	2
mi|Xelaev18017305m.g|	61	C	22	0	ddx41.L	ddx41.L	614	0	3	5	0	3	2	0	3	3	0	3	0
mi|Xelaev18018893m.g|	62	C	8	1	wiz.L	wiz.L	901	0	2	2	0	2	1	0	0	1	0	1	0
mi|Xelaev18020113m.g|	62		0	0	wiz.S	wiz.S	1652	0	1	0	0	0	0	0	0	0	0	0	0
mi|Xelaev18039170m.g|	63	C	8	0	ehmt2.L	ehmt2.L	1101	0	1	2	0	2	0	0	2	1	0	0	0
mi|Xelaev18038655m.g|	64	C	79	0	nono.L	nono.L	464	0	9	11	0	9	9	1	11	11	0	10	8
mi|Xelaev18039873m.g|	65	C	74	0	elmsan1.L	elmsan1.L	1079	1	10	16	1	12	10	0	10	16	0	10	4
mi|Xelaev18041087m.g|	65	C	11	16	elmsan1.S	elmsan1.S	1147	0	5	6	0	3	3	0	3	4	0	3	0
mi|Xelaev18026959m.g|	66	C	0	95	Xelaev18026959m.g	Xelaev18026959m.g	377	7	8	10	8	9	8	4	10	7	4	11	9
mi|Xelaev18036758m.g|	66		0	0	acta2.S	acta2.S	377	7	8	8	8	9	8	4	8	7	4	11	9
mi|Xelaev18010376m.g|	66		0	0	MGC75582.S	MGC75582.S	377	7	8	10	8	9	8	4	10	7	4	11	9
mi|Xelaev18022225m.g|	66		0	0	act3.L	act3.L	377	7	8	10	8	9	8	4	10	7	4	11	9
mi|Xelaev18024220m.g|	66		0	0	act3.S	act3.S	377	7	8	10	8	9	8	4	10	7	4	11	9
mi|Xelaev18029136m.g|	66		0	0	Xelaev18029136m.g	Xelaev18029136m.g	377	7	8	10	8	9	8	4	10	7	4	11	9
mi|Xelaev18041013m.g|	66		0	0	actc1.S	actc1.S	377	7	8	10	8	9	8	4	10	7	4	11	9
mi|Xelaev18007437m.g|	66		0	0	MGC75582.L	MGC75582.L	377	7	8	10	8	9	8	4	10	7	4	11	9
mi|Xelaev18039999m.g|	66		0	0	actc1.L	actc1.L	377	7	8	10	8	9	8	4	10	7	4	11	9
mi|Xelaev18034370m.g|	66		0	0	acta2.L	acta2.L	377	7	8	8	8	9	8	4	8	7	4	11	9
mi|Xelaev18046456m.g|	66	C	0	37	actg1.S	actg1.S	376	9	12	13	9	13	11	6	12	11	4	14	11
mi|Xelaev18047430m.g|	66		0	0	Xelaev18047430m.g	Xelaev18047430m.g	375	9	12	13	9	13	11	6	12	11	4	14	11
mi|Xelaev18045052m.g|	66		0	0	Xelaev18045052m.g	Xelaev18045052m.g	375	9	12	13	9	13	11	6	12	11	4	14	11
mi|Xelaev18043709m.g|	66		0	0	actg1.L	actg1.L	320	7	7	10	7	8	9	5	9	7	3	10	8
mi|Xelaev18000212m.g|	66		0	0	Xelaev18000212m.g	Xelaev18000212m.g	283	7	6	9	7	7	8	5	9	7	3	9	7
mi|Xelaev18003775m.g|	66		0	0	Xelaev18003775m.g	Xelaev18003775m.g	235	0	1	1	0	1	1	0	0	0	0	1	1
mi|Xelaev18026119m.g|	67	C	66	0	msh6.L	msh6.L	1340	0	0	4	0	2	2	0	18	17	0	13	10
mi|Xelaev18010610m.g|	68	C	0	4	sbno1.S	sbno1.S	1410	0	1	1	0	1	0	0	0	0	0	1	0
mi|Xelaev18006251m.g|	68		0	0	sbno2.L	sbno2.L	1334	0	0	0	0	1	0	0	0	0	0	1	0
mi|Xelaev18009783m.g|	68		0	0	sbno2.S	sbno2.S	1327	0	0	0	0	1	0	0	0	0	0	1	0
mi|Xelaev18007784m.g|	68		0	0	sbno1.L	sbno1.L	1365	0	1	1	0	0	0	0	0	0	0	0	0
mi|Xelaev18010848m.g|	69	C	0	5	rps23.S	rps23.S	143	0	0	1	0	2	0	0	1	1	0	0	0
mi|Xelaev18008108m.g|	69		0	0	rps23.L	rps23.L	143	0	0	1	0	2	0	0	1	1	0	0	0
mi|Xelaev18024217m.g|	70	C	29	0	loc100126636.S	loc100126636.S	399	0	5	5	0	5	2	0	4	5	0	3	0
mi|Xelaev18026147m.g|	71	C	81	0	srbd1.L	srbd1.L	1005	0	9	12	0	15	9	0	7	9	0	14	6
mi|Xelaev18020298m.g|	72	C	20	0	polm.S	polm.S	604	0	2	5	0	2	3	0	2	3	0	1	2
mi|Xelaev18026397m.g|	73	C	0	22	Xetrov90022557m.L	Xetrov90022557m.L	264	1	3	3	1	3	2	0	2	2	0	3	2
mi|Xelaev18018596m.g|	73	C	0	10	h2afv.L	h2afv.L	234	1	2	2	2	2	2	0	2	2	0	2	3
mi|Xelaev18020299m.g|	73		0	0	h2afv.S	h2afv.S	221	1	2	2	2	2	2	0	2	2	0	2	3
mi|Xelaev18035407m.g|	73		0	0	h2afx.L	h2afx.L	143	1	3	3	1	3	2	0	2	2	0	3	2
mi|Xelaev18004421m.g|	73		0	0	loc100487455.S	loc100487455.S	139	1	3	3	1	3	2	0	2	2	0	3	2
mi|Xelaev18035406m.g|	73		0	0	loc100487455.L	loc100487455.L	139	1	3	3	1	3	2	0	2	2	0	3	2
mi|Xelaev18014222m.g|	73	C	0	1	Xelaev18014222m.g	Xelaev18014222m.g	139	1	3	3	1	3	2	0	2	2	0	3	2
mi|Xelaev18011606m.g|	73		0	0	hist1h2aa.L	hist1h2aa.L	139	1	3	3	1	3	2	0	2	2	0	2	2
mi|Xelaev18014220m.g|	73		0	0	Xelaev18014220m.g	Xelaev18014220m.g	139	1	3	3	1	3	2	0	2	2	0	3	2
mi|Xelaev18000724m.g|	73		0	0	loc100488074.S	loc100488074.S	130	1	3	3	1	3	2	0	2	2	0	3	2
mi|Xelaev18026408m.g|	73		0	0	hist1h2ad.L	hist1h2ad.L	130	1	3	3	1	3	2	0	2	2	0	3	2
mi|Xelaev18028548m.g|	73		0	0	Xelaev18028548m.g	Xelaev18028548m.g	130	1	3	3	1	3	2	0	2	2	0	3	2
mi|Xelaev18001417m.g|	73		0	0	Xelaev18001417m.g	Xelaev18001417m.g	130	1	3	3	1	3	2	0	2	2	0	3	2
mi|Xelaev18001361m.g|	73		0	0	Xelaev18001361m.g	Xelaev18001361m.g	130	1	3	3	1	3	2	0	2	2	0	3	2
mi|Xelaev18032687m.g|	73		0	0	Xelaev18032687m.g	Xelaev18032687m.g	130	1	3	3	1	3	2	0	2	2	0	3	2
mi|Xelaev18026403m.g|	73		0	0	Xelaev18026403m.g	Xelaev18026403m.g	130	1	3	3	1	3	2	0	2	2	0	3	2
mi|Xelaev18001414m.g|	73		0	0	Xelaev18001414m.g	Xelaev18001414m.g	130	1	3	3	1	3	2	0	2	2	0	3	2
mi|Xelaev18028553m.g|	73		0	0	Xelaev18028553m.g	Xelaev18028553m.g	130	1	3	3	1	3	2	0	2	2	0	3	2
mi|Xelaev18001408m.g|	73		0	0	Xelaev18001408m.g	Xelaev18001408m.g	130	1	3	3	1	3	2	0	2	2	0	3	2
mi|Xelaev18003602m.g|	73		0	0	Xelaev18003602m.g	Xelaev18003602m.g	130	1	3	3	1	3	2	0	2	2	0	3	2
mi|Xelaev18002294m.g|	73		0	0	Xelaev18002294m.g	Xelaev18002294m.g	130	1	3	3	1	3	2	0	2	2	0	3	2
mi|Xelaev18001359m.g|	73		0	0	Xelaev18001359m.g	Xelaev18001359m.g	130	1	3	3	1	3	2	0	2	2	0	3	2
mi|Xelaev18001467m.g|	73		0	0	Xelaev18001467m.g	Xelaev18001467m.g	130	1	3	3	1	3	2	0	2	2	0	3	2
mi|Xelaev18002343m.g|	73		0	0	Xelaev18002343m.g	Xelaev18002343m.g	129	1	3	3	1	3	2	0	2	2	0	3	2
mi|Xelaev18005732m.g|	73	C	0	7	h2afz.L	h2afz.L	128	1	3	3	2	3	3	0	2	3	0	3	3
mi|Xelaev18009423m.g|	73		0	0	h2afz.S	h2afz.S	128	1	3	3	2	3	3	0	2	3	0	3	3
mi|Xelaev18002634m.g|	73		0	0	hist1h2ad.1	hist1h2ad.1	127	1	3	3	1	3	2	0	2	2	0	3	2
mi|Xelaev18024002m.g|	73		0	0	loc100486672.L	loc100486672.L	126	1	2	2	2	2	2	0	2	2	0	2	2
mi|Xelaev18025911m.g|	73		0	0	loc100486672.S	loc100486672.S	126	1	2	2	2	2	2	0	2	2	0	2	2
mi|Xelaev18004420m.g|	73		0	0	h2afx.S	h2afx.S	139	0	2	2	0	2	1	0	1	1	0	1	1
mi|Xelaev18001370m.g|	73		0	0	Xelaev18001370m.g	Xelaev18001370m.g	130	0	2	2	0	2	1	0	1	1	0	2	1
mi|Xelaev18043703m.g|	74	C	43	0	loc100488904-like.L	loc100488904-like.L	847	0	5	5	0	5	5	0	6	6	0	7	4
mi|Xelaev18033797m.g|	75		0	0	Xelaev18033797m.g	Xelaev18033797m.g	246	0	2	0	0	1	1	0	0	0	0	0	0
mi|Xelaev18003627m.g|	75	C	1	4	Xelaev18003627m.g	Xelaev18003627m.g	246	0	2	1	0	1	1	0	0	0	0	0	0
mi|Xelaev18024157m.g|	75		0	0	Xelaev18024157m.g	Xelaev18024157m.g	238	0	1	0	0	0	0	0	0	0	0	0	0
mi|Xelaev18043630m.g|	76	C	17	0	rtel1.L	rtel1.L	1275	0	1	1	0	1	2	0	4	3	0	4	1
mi|Xelaev18006024m.g|	77	C	5	0	uhrf1.L	uhrf1.L	722	0	2	6	0	5	3	0	4	3	0	3	3
mi|Xelaev18009580m.g|	77	C	25	24	uhrf1.S	uhrf1.S	772	0	4	11	0	4	4	0	7	7	0	7	5
mi|Xelaev18046188m.g|	78	C	1	12	sall4.S	sall4.S	1077	0	1	3	0	3	1	0	3	0	0	2	0
mi|Xelaev18043463m.g|	78		0	0	sall4.L	sall4.L	1063	0	1	3	0	3	1	0	3	0	0	1	0
mi|Xelaev18024777m.g|	78		0	0	sall1.S	sall1.S	1376	0	0	1	0	1	0	0	1	0	0	0	0
mi|Xelaev18031753m.g|	78		0	0	sall3.L	sall3.L	1278	0	0	1	0	1	0	0	1	0	0	0	0
mi|Xelaev18033531m.g|	78		0	0	sall3.S	sall3.S	1259	0	0	1	0	1	0	0	1	0	0	0	0
mi|Xelaev18022516m.g|	78		0	0	sall1.L	sall1.L	1234	0	0	1	0	1	0	0	1	0	0	0	0
mi|Xelaev18039409m.g|	79	C	37	0	paf1.L	paf1.L	524	0	4	7	0	5	3	0	4	3	0	8	3
mi|Xelaev18013860m.g|	80	C	65	0	mre11a.L	mre11a.L	711	0	7	9	0	8	9	0	9	9	0	7	7
mi|Xelaev18018942m.g|	81	C	7	15	Xelaev18018942m.g	Xelaev18018942m.g	200	0	3	5	0	2	0	0	5	3	0	2	2
mi|Xelaev18000500m.g|	81		0	0	Xelaev18000500m.g	Xelaev18000500m.g	204	0	1	1	0	0	0	0	1	0	0	0	0
mi|Xelaev18027117m.g|	81		0	0	asf1a.L	asf1a.L	201	0	1	1	0	0	0	0	1	0	0	0	0
mi|Xelaev18020106m.g|	81		0	0	Xelaev18020106m.g	Xelaev18020106m.g	124	0	1	2	0	1	0	0	2	2	0	2	2
sp|P04745|AMY1_HUMAN_contaminant	82	C	20	2	Alpha-amylase 1 OS=Homo sapiens GN=AMY1A PE=1 SV=2	Alpha-amylase 1 OS=Homo sapiens GN=AMY1A PE=1 SV=2	511	0	0	1	0	0	0	0	3	8	0	6	4
mi|Xelaev18025478m.g|	82		0	0	amy2b.S	amy2b.S	526	0	0	0	0	0	0	0	0	1	0	0	1
mi|Xelaev18023439m.g|	82		0	0	Xelaev18023439m.g	Xelaev18023439m.g	511	0	0	0	0	0	0	0	0	1	0	0	1
mi|Xelaev18015989m.g|	83	C	36	0	Xelaev18015989m.g	Xelaev18015989m.g	455	0	5	5	0	4	3	0	4	5	0	6	4
mi|Xelaev18026335m.g|	84		0	0	ppp1cb.L	ppp1cb.L	327	0	1	0	0	1	0	0	0	0	0	0	0
mi|Xelaev18028596m.g|	84		0	0	ppp1cb.S	ppp1cb.S	327	0	1	0	0	1	0	0	0	0	0	0	0
mi|Xelaev18010659m.g|	84	C	0	4	ppp1cc.S	ppp1cc.S	323	0	1	0	0	2	0	0	0	0	0	0	1
mi|Xelaev18007849m.g|	84		0	0	ppp1cc.L	ppp1cc.L	323	0	1	0	0	2	0	0	0	0	0	0	1
mi|Xelaev18003383m.g|	84		0	0	Xelaev18003383m.g	Xelaev18003383m.g	230	0	1	0	0	1	0	0	0	0	0	0	1
mi|Xelaev18002199m.g|	84		0	0	Xelaev18002199m.g	Xelaev18002199m.g	214	0	1	0	0	1	0	0	0	0	0	0	1
mi|Xelaev18000745m.g|	85	C	46	108	smarca4.S	smarca4.S	1600	0	21	27	0	21	20	0	22	17	0	16	10
mi|Xelaev18004432m.g|	85		0	0	smarca4.L	smarca4.L	1600	0	14	18	0	13	14	0	14	14	0	13	8
mi|Xelaev18003798m.g|	85		0	0	smarca2-like.S	smarca2-like.S	1576	0	6	9	0	5	7	0	7	7	0	6	4
mi|Xelaev18006846m.g|	85		0	0	smarca2-like.L	smarca2-like.L	1572	0	6	9	0	5	7	0	7	7	0	6	4
mi|Xelaev18023768m.g|	86	C	207	0	fancd2.L	fancd2.L	1445	0	21	24	0	26	27	0	30	29	0	26	24
mi|Xelaev18005659m.g|	87	C	1	0	larp7.L	larp7.L	588	0	0	1	0	0	0	0	0	0	0	0	0
mi|Xelaev18042475m.g|	88	C	0	28	tubb.S	tubb.S	476	1	2	1	2	3	4	2	4	2	2	2	3
mi|Xelaev18022595m.g|	88		0	0	tubb3.L	tubb3.L	449	0	0	0	0	2	2	1	2	1	0	0	1
mi|Xelaev18024891m.g|	88		0	0	tubb3.S	tubb3.S	449	0	0	0	0	2	2	1	2	1	0	0	1
mi|Xelaev18033612m.g|	88		0	0	tubb6.S	tubb6.S	446	0	0	0	0	2	2	1	2	1	0	0	1
mi|Xelaev18019127m.g|	88		0	0	tubb4a.L	tubb4a.L	444	0	1	0	1	2	3	1	3	1	1	1	2
mi|Xelaev18039222m.g|	88		0	0	tubb.L	tubb.L	444	1	2	1	2	3	4	2	4	2	2	2	3
mi|Xelaev18033421m.g|	88		0	0	tubb2b.S	tubb2b.S	443	0	1	0	1	2	3	1	3	1	1	1	2
mi|Xelaev18031827m.g|	88		0	0	tubb6.L	tubb6.L	446	0	0	1	0	1	1	1	1	1	0	1	1
mi|Xelaev18031586m.g|	88		0	0	tubb2b.L	tubb2b.L	445	0	1	1	1	1	2	1	2	1	1	2	2
mi|Xelaev18038180m.g|	88	C	0	3	Xelaev18038180m.g	Xelaev18038180m.g	445	0	1	1	1	1	2	2	2	1	1	2	2
mi|Xelaev18041434m.g|	88		0	0	Xelaev18041434m.g	Xelaev18041434m.g	445	0	1	1	1	1	2	2	2	1	1	2	2
mi|Xelaev18000833m.g|	88		0	0	tubb4a.S	tubb4a.S	444	0	0	1	0	1	1	1	1	1	0	1	1
mi|Xelaev18046263m.g|	88		0	0	loc100498230.S	loc100498230.S	457	0	0	0	0	1	1	1	1	1	0	0	1
mi|Xelaev18043546m.g|	88		0	0	loc100498230.L	loc100498230.L	445	0	0	0	0	1	1	1	1	1	0	0	1
mi|Xelaev18039956m.g|	89	C	0	2	psma6.L	psma6.L	246	0	0	0	0	0	0	0	0	1	0	1	0
mi|Xelaev18041037m.g|	89		0	0	psma6.S	psma6.S	236	0	0	0	0	0	0	0	0	1	0	1	0
mi|Xelaev18045560m.g|	90	C	35	0	top3a.L	top3a.L	1022	0	2	5	0	5	6	0	4	7	0	3	3
mi|Xelaev18027502m.g|	91	C	41	0	rfc4.L	rfc4.L	363	0	5	7	0	5	3	0	6	6	0	6	3
mi|Xelaev18015405m.g|	92	C	0	11	rpl24.S	rpl24.S	155	0	3	2	0	2	0	0	2	1	0	1	0
mi|Xelaev18012819m.g|	92		0	0	rpl24.L	rpl24.L	155	0	3	2	0	2	0	0	2	1	0	1	0
mi|Xelaev18014743m.g|	93	C	0	12	rpl8.S	rpl8.S	257	0	2	1	0	2	1	0	2	1	0	1	2
mi|Xelaev18012399m.g|	93		0	0	rpl8.L	rpl8.L	257	0	2	1	0	2	1	0	2	1	0	1	2
mi|Xelaev18018751m.g|	94	C	17	0	npm2.L	npm2.L	200	1	2	2	0	2	2	0	1	1	0	3	3
mi|Xelaev18020197m.g|	95	C	16	0	npm2.S	npm2.S	196	0	2	3	0	2	0	0	2	3	0	2	2
mi|Xelaev18008749m.g|	96	C	0	1	cct7.S	cct7.S	651	0	0	0	0	1	0	0	0	0	0	0	0
mi|Xelaev18004907m.g|	96		0	0	cct7.L	cct7.L	543	0	0	0	0	1	0	0	0	0	0	0	0
mi|Xelaev18046619m.g|	97		0	0	rbm39.S	rbm39.S	554	0	2	3	0	1	1	0	4	4	0	5	3
mi|Xelaev18043948m.g|	97	C	6	23	rbm39.L	rbm39.L	540	0	2	4	0	2	1	0	5	5	0	6	4
mi|Xelaev18045092m.g|	98	C	25	7	hbz.L	hbz.L	142	0	2	6	1	4	3	0	4	4	0	5	3
mi|Xelaev18047459m.g|	98		0	0	hbz.S	hbz.S	174	0	1	2	0	2	1	0	2	2	0	1	0
mi|Xelaev18047461m.g|	98		0	0	Xelaev18047461m.g	Xelaev18047461m.g	142	0	1	2	0	2	1	0	2	2	0	1	0
mi|Xelaev18045096m.g|	98		0	0	Xelaev18045096m.g	Xelaev18045096m.g	142	0	1	2	0	2	1	0	2	2	0	1	0
mi|Xelaev18045095m.g|	98	C	11	11	Xelaev18045095m.g	Xelaev18045095m.g	139	1	3	4	0	2	2	0	2	4	0	3	1
mi|Xelaev18047460m.g|	98		0	0	Xelaev18047460m.g	Xelaev18047460m.g	167	0	1	1	0	1	1	0	1	1	0	1	0
mi|Xelaev18047462m.g|	98		0	0	Xelaev18047462m.g	Xelaev18047462m.g	142	0	1	1	0	1	1	0	1	1	0	1	0
mi|Xelaev18047463m.g|	98		0	0	Xelaev18047463m.g	Xelaev18047463m.g	142	0	1	1	0	1	1	0	1	1	0	1	0
mi|Xelaev18045099m.g|	98		0	0	Xelaev18045099m.g	Xelaev18045099m.g	142	0	1	1	0	0	1	0	1	1	0	1	1
mi|Xelaev18045098m.g|	98		0	0	Xelaev18045098m.g	Xelaev18045098m.g	142	0	1	1	0	0	1	0	1	1	0	1	1
mi|Xelaev18045100m.g|	98		0	0	Xelaev18045100m.g	Xelaev18045100m.g	142	0	1	1	0	0	1	0	1	1	0	1	1
mi|Xelaev18047464m.g|	98		0	0	Xelaev18047464m.g	Xelaev18047464m.g	142	0	1	1	0	0	1	0	1	1	0	1	1
mi|Xelaev18045097m.g|	98		0	0	Xelaev18045097m.g	Xelaev18045097m.g	88	0	1	1	0	0	1	0	1	1	0	1	1
mi|Xelaev18038191m.g|	99	C	27	0	prpf4.L	prpf4.L	538	0	4	5	0	5	2	0	4	5	0	2	0
mi|Xelaev18006248m.g|	100	C	0	3	polr2e.L	polr2e.L	210	0	0	1	0	0	0	0	1	0	0	1	0
mi|Xelaev18009777m.g|	100		0	0	polr2e.S	polr2e.S	210	0	0	1	0	0	0	0	1	0	0	1	0
##mi|Xelaev18015574m.g|	101	C	3	0	####ppp2r3b.S	####ppp2r3b.S	513	0	1	1	0	0	0	0	0	0	0	1	0
mi|Xelaev18002502m.g|	102	C	17	28	trim24.L	trim24.L	1076	0	6	8	0	5	3	0	7	6	0	6	4
mi|Xelaev18019830m.g|	102	C	7	0	trim24.S	trim24.S	997	0	6	6	0	5	2	0	6	4	0	3	3
mi|Xelaev18039070m.g|	103	C	1	0	cd3eap-like.L	cd3eap-like.L	211	0	0	1	0	0	0	0	0	0	0	0	0
mi|Xelaev18011175m.g|	104	C	29	0	fancg.S	fancg.S	640	0	2	3	0	3	2	0	6	6	0	4	3
sp|P14923|PLAK_HUMAN_contaminant	105	C	21	2	Junction plakoglobin OS=Homo sapiens GN=JUP PE=1 SV=3	Junction plakoglobin OS=Homo sapiens GN=JUP PE=1 SV=3	745	0	2	0	5	1	3	1	1	2	0	8	0
mi|Xelaev18045870m.g|	105		0	0	jup.S	jup.S	791	0	0	0	0	0	0	0	0	0	0	2	0
mi|Xelaev18031149m.g|	105		0	0	ctnnb1.L	ctnnb1.L	781	0	0	0	0	0	0	0	0	0	0	1	0
mi|Xelaev18033202m.g|	105		0	0	ctnnb1.S	ctnnb1.S	781	0	0	0	0	0	0	0	0	0	0	1	0
mi|Xelaev18043099m.g|	105		0	0	jup.L	jup.L	737	0	0	0	0	0	0	0	0	0	0	2	0
sp|P02663|CASA2_BOVIN_contaminant	106	C	13	0	Alpha-S2-casein OS=Bos taurus GN=CSN1S2 PE=1 SV=2	Alpha-S2-casein OS=Bos taurus GN=CSN1S2 PE=1 SV=2	222	0	3	0	3	0	2	0	0	0	0	2	3
mi|Xelaev18004708m.g|	107	C	60	0	fanca.L	fanca.L	1423	0	5	8	0	9	8	0	7	8	0	9	6
sp|P05109|S10A8_HUMAN_contaminant	108	C	29	0	Protein S100-A8 OS=Homo sapiens GN=S100A8 PE=1 SV=1	Protein S100-A8 OS=Homo sapiens GN=S100A8 PE=1 SV=1	93	0	1	1	1	1	1	0	6	8	0	8	2
sp|Q02413|DSG1_HUMAN_contaminant	109	C	20	0	Desmoglein-1 OS=Homo sapiens GN=DSG1 PE=1 SV=2	Desmoglein-1 OS=Homo sapiens GN=DSG1 PE=1 SV=2	1049	0	2	0	2	0	2	1	0	6	0	5	2
mi|Xelaev18042966m.g|	110		0	0	gatad2b.S	gatad2b.S	630	0	1	0	0	1	1	0	1	0	0	1	0
mi|Xelaev18001159m.g|	110	C	2	11	gatad2a.S	gatad2a.S	600	0	2	0	0	3	3	0	2	1	0	2	0
mi|Xelaev18040868m.g|	110		0	0	gatad2b.L	gatad2b.L	584	0	1	0	0	1	1	0	1	0	0	1	0
mi|Xelaev18006614m.g|	110		0	0	gatad2a.L	gatad2a.L	558	0	1	0	0	3	3	0	2	1	0	1	0
mi|Xelaev18016603m.g|	111	C	66	0	recql.L	recql.L	652	0	9	11	0	9	7	0	10	8	0	9	4
mi|Xelaev18020398m.g|	111	C	3	53	blm.S	blm.S	1368	0	6	6	0	6	8	0	9	8	0	8	5
mi|Xelaev18018489m.g|	111	C	38	0	blm.L	blm.L	1367	0	10	10	0	11	12	0	14	12	0	14	8
mi|Xelaev18031884m.g|	112	C	1	0	smchd1.L	smchd1.L	1987	0	0	1	0	0	0	0	0	0	0	0	0
mi|Xelaev18010694m.g|	113	C	16	24	rfc5.S	rfc5.S	335	0	4	6	0	4	4	0	6	6	0	6	4
mi|Xelaev18007893m.g|	113	C	7	0	rfc5.L	rfc5.L	335	0	3	5	0	3	3	0	6	4	0	4	3
mi|Xelaev18047090m.g|	114	C	34	0	rif1.S	rif1.S	2326	0	2	7	0	4	2	0	7	4	0	5	3
mi|Xelaev18035119m.g|	115	C	12	0	rad9a.L	rad9a.L	377	0	0	0	0	0	2	0	2	2	0	4	2
mi|Xelaev18032103m.g|	116	C	11	0	orc5.L	orc5.L	440	0	2	4	0	2	0	0	1	1	0	0	1
mi|Xelaev18028549m.g|	117	C	0	105	Xetrov90029512m.S	Xetrov90029512m.S	233	1	12	15	2	11	11	2	12	15	2	10	12
mi|Xelaev18001466m.g|	117		0	0	Xelaev18001466m.g	Xelaev18001466m.g	126	0	4	6	0	3	4	0	3	6	0	1	4
mi|Xelaev18002292m.g|	117		0	0	Xelaev18002292m.g	Xelaev18002292m.g	126	0	4	6	0	3	4	0	3	6	0	1	4
mi|Xelaev18032686m.g|	117		0	0	Xelaev18032686m.g	Xelaev18032686m.g	126	0	4	6	0	3	4	0	3	6	0	1	4
mi|Xelaev18000725m.g|	117		0	0	loc100497082.S	loc100497082.S	126	0	4	6	0	3	4	0	3	6	0	1	4
mi|Xelaev18002342m.g|	117		0	0	loc101733171.1.S	loc101733171.1.S	126	0	4	6	0	3	4	0	3	6	0	1	4
mi|Xelaev18001369m.g|	117		0	0	Xelaev18001369m.g	Xelaev18001369m.g	126	0	4	6	0	3	4	0	3	6	0	1	4
mi|Xelaev18028547m.g|	117		0	0	loc101733171.S	loc101733171.S	126	0	4	6	0	3	4	0	3	6	0	1	4
mi|Xelaev18001415m.g|	117		0	0	Xelaev18001415m.g	Xelaev18001415m.g	126	0	4	6	0	3	4	0	3	6	0	1	4
mi|Xelaev18032685m.g|	117		0	0	Xelaev18032685m.g	Xelaev18032685m.g	126	0	4	6	0	3	4	0	3	6	0	1	4
mi|Xelaev18001514m.g|	117		0	0	Xelaev18001514m.g	Xelaev18001514m.g	126	0	4	6	0	3	4	0	3	6	0	1	4
mi|Xelaev18001416m.g|	117		0	0	Xelaev18001416m.g	Xelaev18001416m.g	126	0	4	6	0	3	4	0	3	6	0	1	4
mi|Xelaev18004540m.g|	117		0	0	loc100495041.1.S	loc100495041.1.S	94	0	4	5	0	2	3	0	3	5	0	1	3
mi|Xelaev18026404m.g|	117		0	0	Xetrov90029512m.L	Xetrov90029512m.L	238	1	12	14	2	11	10	2	12	15	2	10	12
mi|Xelaev18001468m.g|	117		0	0	Xetrov90015432m.L	Xetrov90015432m.L	126	1	5	5	2	4	4	2	5	5	2	5	5
mi|Xelaev18026410m.g|	117		0	0	Xetrov90022561m.L	Xetrov90022561m.L	103	1	7	8	1	7	6	1	8	8	1	8	7
mi|Xelaev18028554m.g|	117		0	0	Xelaev18028554m.g	Xelaev18028554m.g	103	1	8	9	2	8	7	2	9	9	2	9	8
mi|Xelaev18001413m.g|	117		0	0	Xelaev18001413m.g	Xelaev18001413m.g	103	1	8	9	2	8	7	2	9	9	2	9	8
mi|Xelaev18001418m.g|	117		0	0	Xelaev18001418m.g	Xelaev18001418m.g	103	1	8	9	2	8	7	2	9	9	2	9	8
mi|Xelaev18001409m.g|	117		0	0	Xelaev18001409m.g	Xelaev18001409m.g	103	1	8	9	2	8	7	2	9	9	2	9	8
mi|Xelaev18000726m.g|	117		0	0	Xelaev18000726m.g	Xelaev18000726m.g	103	1	8	9	2	8	7	2	9	9	2	9	8
mi|Xelaev18004387m.g|	117		0	0	Xelaev18004387m.g	Xelaev18004387m.g	103	1	8	9	2	8	7	2	9	9	2	9	8
mi|Xelaev18001420m.g|	117		0	0	Xelaev18001420m.g	Xelaev18001420m.g	103	0	6	7	1	7	6	1	7	7	1	7	6
mi|Xelaev18002669m.g|	117		0	0	Xelaev18002669m.g	Xelaev18002669m.g	103	1	5	5	2	4	4	2	5	5	2	5	5
mi|Xelaev18026398m.g|	117		0	0	Xelaev18026398m.g	Xelaev18026398m.g	103	1	8	9	2	8	7	2	9	9	2	9	8
mi|Xelaev18002344m.g|	117		0	0	Xelaev18002344m.g	Xelaev18002344m.g	103	1	8	9	2	8	7	2	9	9	2	9	8
mi|Xelaev18001464m.g|	117		0	0	Xelaev18001464m.g	Xelaev18001464m.g	96	1	8	9	2	8	7	2	9	9	2	9	8
mi|Xelaev18026402m.g|	117		0	0	Xetrov90015406m.L	Xetrov90015406m.L	82	1	8	9	2	8	7	2	9	9	2	9	8
mi|Xelaev18002635m.g|	117		0	0	Xelaev18002635m.g	Xelaev18002635m.g	70	0	5	6	0	6	5	0	6	6	0	6	5
mi|Xelaev18026396m.g|	117		0	0	Xelaev18026396m.g	Xelaev18026396m.g	347	0	4	5	0	3	3	0	3	6	0	1	4
mi|Xelaev18002637m.g|	117		0	0	hist1h2bj.1	hist1h2bj.1	126	0	4	5	0	3	3	0	3	6	0	1	4
mi|Xelaev18026409m.g|	117		0	0	Xelaev18026409m.g	Xelaev18026409m.g	126	0	4	5	0	3	3	0	3	6	0	1	4
mi|Xelaev18002636m.g|	117		0	0	Xelaev18002636m.g	Xelaev18002636m.g	126	0	4	5	0	3	3	0	3	6	0	1	4
mi|Xelaev18002633m.g|	117		0	0	Xelaev18002633m.g	Xelaev18002633m.g	126	0	4	5	0	3	3	0	3	6	0	1	4
mi|Xelaev18002295m.g|	117		0	0	Xelaev18002295m.g	Xelaev18002295m.g	67	0	4	3	0	2	2	0	3	3	0	1	3
mi|Xelaev18040067m.g|	118	C	18	0	rad51.L	rad51.L	336	0	1	4	0	3	1	0	2	2	0	3	2
mi|Xelaev18021990m.g|	119	C	12	3	incenp.L	incenp.L	975	0	3	3	0	2	0	0	4	1	0	0	2
mi|Xelaev18024337m.g|	119	C	18	0	incenp.S	incenp.S	892	0	2	3	0	3	2	0	4	3	0	2	2
mi|Xelaev18010101m.g|	120	C	41	0	smc5.S	smc5.S	1063	0	0	2	0	4	4	0	8	9	0	9	5
mi|Xelaev18023356m.g|	121	C	0	1	gtf2b.L	gtf2b.L	316	0	0	1	0	0	0	0	0	0	0	0	0
mi|Xelaev18025413m.g|	121		0	0	gtf2b.S	gtf2b.S	316	0	0	1	0	0	0	0	0	0	0	0	0
mi|Xelaev18027188m.g|	122		0	0	cdk19.L	cdk19.L	534	0	3	2	0	3	0	0	0	1	0	2	1
mi|Xelaev18013768m.g|	122	C	0	14	cdk8.L	cdk8.L	499	0	3	3	0	3	0	0	0	2	0	2	1
mi|Xelaev18029276m.g|	122		0	0	cdk19.S	cdk19.S	490	0	3	2	0	3	0	0	0	1	0	2	1
mi|Xelaev18016217m.g|	122		0	0	cdk8.S	cdk8.S	464	0	3	3	0	3	0	0	0	2	0	2	1
mi|Xelaev18023650m.g|	123	C	2	1	ddx17.L	ddx17.L	610	0	2	2	1	3	1	0	1	1	0	3	1
mi|Xelaev18046869m.g|	123	C	11	84	ddx5.S	ddx5.S	655	0	13	11	0	13	11	0	11	12	0	13	11
mi|Xelaev18044272m.g|	123	C	9	0	ddx5.L	ddx5.L	608	0	13	12	0	12	10	0	12	12	0	12	11
mi|Xelaev18012403m.g|	123		0	0	ddx3x.L	ddx3x.L	697	0	1	1	0	2	0	0	1	1	0	1	1
mi|Xelaev18014742m.g|	123		0	0	ddx3x.S	ddx3x.S	695	0	1	1	0	2	0	0	1	1	0	1	1
mi|Xelaev18020426m.g|	124	C	0	4	rpl4.S	rpl4.S	401	0	1	2	0	1	0	0	0	0	0	0	0
mi|Xelaev18018449m.g|	124		0	0	rpl4.L	rpl4.L	396	0	1	2	0	1	0	0	0	0	0	0	0
mi|Xelaev18004559m.g|	125	C	2	15	fus.S	fus.S	511	0	3	3	1	2	2	0	2	2	0	2	0
mi|Xelaev18001535m.g|	125		0	0	fus.L	fus.L	514	0	2	2	1	2	2	0	2	2	0	2	0
mi|Xelaev18015309m.g|	125	C	1	0	taf15.S	taf15.S	483	0	1	2	1	1	1	0	1	1	0	1	0
mi|Xelaev18012683m.g|	125		0	0	taf15.L	taf15.L	461	0	1	1	1	1	1	0	1	1	0	1	0
mi|Xelaev18020633m.g|	126	C	0	17	leo1.S	leo1.S	782	0	2	2	0	4	0	0	2	3	0	2	2
mi|Xelaev18018205m.g|	126		0	0	leo1.L	leo1.L	716	0	2	2	0	4	0	0	2	3	0	2	2
mi|Xelaev18041775m.g|	127	C	60	103	hcfc1.S	hcfc1.S	2098	0	21	29	0	25	16	0	21	22	0	17	12
mi|Xelaev18002853m.g|	127	C	16	0	hcfc1.L	hcfc1.L	2060	0	15	19	0	17	14	0	16	16	0	15	7
mi|Xelaev18017397m.g|	127		0	0	hcfc2.L	hcfc2.L	780	0	1	2	0	1	1	0	1	1	0	1	1
mi|Xelaev18029135m.g|	128	C	21	0	sprtn.S	sprtn.S	565	0	2	3	0	3	2	0	5	3	0	2	1
mi|Xelaev18036397m.g|	129	C	89	0	rcc2.L	rcc2.L	513	0	10	12	0	12	12	1	12	10	0	12	8
sp|P00761|TRYP_PIG_contaminant	130	C	152	0	Trypsin OS=Sus scrofa PE=1 SV=1	Trypsin OS=Sus scrofa PE=1 SV=1	231	13	10	17	12	11	10	16	15	16	14	10	8
mi|Xelaev18004521m.g|	131	C	2	0	Xelaev18004521m.g	Xelaev18004521m.g	85	0	0	0	0	0	0	1	0	0	1	0	0
mi|Xelaev18017592m.g|	132	C	26	57	arid2.L	arid2.L	1812	0	8	19	0	11	6	0	11	13	0	8	7
mi|Xelaev18021122m.g|	132	C	34	0	arid2.S	arid2.S	1809	0	12	18	0	14	10	0	13	11	0	8	5
mi|Xelaev18025208m.g|	133	C	27	0	kif2c.S	kif2c.S	693	0	14	13	0	13	12	0	13	14	0	11	11
mi|Xelaev18023091m.g|	133	C	44	74	kif2c.L	kif2c.L	730	0	14	16	0	16	14	0	15	15	0	14	14
mi|Xelaev18003638m.g|	133		0	0	kif2a.S	kif2a.S	707	0	0	0	0	0	1	0	0	1	0	1	0
mi|Xelaev18008243m.g|	133		0	0	kif2a.L	kif2a.L	705	0	0	0	0	0	1	0	0	1	0	1	0
mi|Xelaev18002617m.g|	134	C	8	0	pbrm1.S	pbrm1.S	1042	0	13	14	0	14	11	0	10	12	0	10	8
mi|Xelaev18004697m.g|	134	C	102	84	pbrm1.L	pbrm1.L	1330	0	24	32	0	27	23	0	22	25	0	19	14
mi|Xelaev18016356m.g|	135	C	1	0	rsf1.S	rsf1.S	1446	0	0	1	0	0	0	0	0	0	0	0	0
mi|Xelaev18003681m.g|	136	C	93	21	nop56.L	nop56.L	532	1	14	18	5	10	9	7	12	12	3	13	10
mi|Xelaev18008672m.g|	136		0	0	nop56.S	nop56.S	501	0	3	3	1	2	2	1	2	3	0	2	2
mi|Xelaev18016266m.g|	137	C	0	6	dcun1d5.S	dcun1d5.S	232	0	1	1	0	0	1	0	1	1	0	1	0
mi|Xelaev18013830m.g|	137		0	0	dcun1d5.L	dcun1d5.L	232	0	1	1	0	0	1	0	1	1	0	1	0
mi|Xelaev18019533m.g|	138	C	9	0	srrt.L	srrt.L	844	0	2	4	0	1	0	0	1	1	0	0	0
mi|Xelaev18043657m.g|	139	C	35	0	Xelaev18043657m.g	Xelaev18043657m.g	716	0	8	10	0	5	2	0	6	4	0	4	4
mi|Xelaev18046384m.g|	139	C	12	12	Xelaev18046384m.g	Xelaev18046384m.g	724	0	3	4	0	5	2	0	4	3	0	2	1
mi|Xelaev18046386m.g|	139		0	0	Xelaev18046386m.g	Xelaev18046386m.g	354	0	1	1	0	2	1	0	1	1	0	1	1
mi|Xelaev18025900m.g|	140	C	4	57	ruvbl1.S	ruvbl1.S	456	0	8	12	0	8	6	0	8	8	0	7	4
mi|Xelaev18023992m.g|	140	C	5	0	ruvbl1.L	ruvbl1.L	456	0	9	12	0	7	5	0	9	8	0	8	4
sp|P31944|CASPE_HUMAN_contaminant	141	C	24	0	Caspase-14 OS=Homo sapiens GN=CASP14 PE=1 SV=2	Caspase-14 OS=Homo sapiens GN=CASP14 PE=1 SV=2	242	0	0	0	1	0	0	0	4	9	0	7	3
mi|Xelaev18010510m.g|	142	C	2	32	smarcb1.S	smarcb1.S	409	0	6	6	0	4	4	0	5	4	0	3	2
mi|Xelaev18007630m.g|	142	C	2	0	smarcb1.L	smarcb1.L	378	0	6	5	0	5	4	0	5	4	0	3	2
mi|Xelaev18026122m.g|	143	C	27	0	msh2.L	msh2.L	932	0	0	0	0	0	0	0	10	11	0	4	2
##mi|Xelaev18042200m.g|	144	C	2	0	####Xetrov90020511m.S	####Xetrov90020511m.S	237	0	1	0	0	0	0	0	0	1	0	0	0
mi|Xelaev18033976m.g|	145	C	15	0	mtbp.S	mtbp.S	860	0	2	4	0	1	1	0	3	2	0	2	0
mi|Xelaev18007614m.g|	146	C	294	0	cabin1.L	cabin1.L	2143	0	37	48	0	41	34	0	38	36	0	34	26
mi|Xelaev18039612m.g|	147	C	62	0	fancm.L	fancm.L	2165	0	4	6	0	8	6	0	16	11	0	7	4
mi|Xelaev18013589m.g|	148	C	31	0	cdca7-like.1.L	cdca7-like.1.L	332	0	5	5	0	6	3	0	3	4	0	3	2
mi|Xelaev18039132m.g|	149	C	105	0	daxx.L	daxx.L	911	0	14	20	0	12	10	0	14	13	0	11	11
mi|Xelaev18037252m.g|	150	C	126	0	ssrp1.S	ssrp1.S	594	1	12	19	3	19	11	4	13	15	2	16	11
mi|Xelaev18035192m.g|	151	C	24	15	exosc10.L	exosc10.L	890	0	4	10	0	7	3	0	4	5	0	3	3
mi|Xelaev18037175m.g|	151		0	0	exosc10.S	exosc10.S	717	0	1	3	0	2	2	0	2	3	0	1	1
mi|Xelaev18011184m.g|	152	C	17	0	recql4.L	recql4.L	1504	0	1	4	0	4	0	0	2	3	0	3	0
mi|Xelaev18011729m.g|	153	C	41	91	rpa1.L	rpa1.L	609	0	15	17	0	17	18	0	16	18	0	16	15
mi|Xelaev18014137m.g|	153	C	13	0	rpa1.S	rpa1.S	584	0	9	14	0	14	13	0	16	14	0	13	11
mi|Xelaev18010863m.g|	154	C	12	0	gtf2h2.S	gtf2h2.S	395	0	1	2	0	3	0	0	3	1	0	2	0
mi|Xelaev18030897m.g|	155	C	33	13	rpa3.L	rpa3.L	121	0	6	4	0	5	3	0	6	7	0	8	7
mi|Xelaev18032996m.g|	155		0	0	rpa3.S	rpa3.S	121	0	2	1	0	2	0	0	2	2	0	2	2
mi|Xelaev18015194m.g|	156	C	3	6	meaf6.S	meaf6.S	218	0	1	2	0	2	1	0	1	1	0	1	0
mi|Xelaev18012516m.g|	156		0	0	meaf6.L	meaf6.L	246	0	1	1	0	1	1	0	0	1	0	1	0
mi|Xelaev18019581m.g|	157	C	0	2	eif4a1.L	eif4a1.L	406	0	1	1	1	1	0	0	1	1	0	1	2
mi|Xelaev18001058m.g|	157		0	0	eif4a1.S	eif4a1.S	406	0	1	1	1	1	0	0	1	1	0	1	2
mi|Xelaev18026588m.g|	157	C	5	0	Xelaev18026588m.g	Xelaev18026588m.g	287	0	2	1	0	1	1	0	0	1	0	1	0
mi|Xelaev18028877m.g|	157	C	4	9	Xelaev18028877m.g	Xelaev18028877m.g	413	0	3	4	1	0	0	0	2	1	0	1	1
mi|Xelaev18027504m.g|	157		0	0	eif4a2.L	eif4a2.L	360	0	1	1	1	0	0	0	1	1	0	1	2
mi|Xelaev18028878m.g|	157		0	0	Xelaev18028878m.g	Xelaev18028878m.g	115	0	1	1	0	0	0	0	0	0	0	0	0
mi|Xelaev18000384m.g|	158	C	51	0	hira.L	hira.L	973	0	23	27	0	21	18	0	19	22	0	19	17
mi|Xelaev18010537m.g|	158	C	66	115	hira.S	hira.S	1095	0	27	28	0	23	18	0	22	23	0	23	17
mi|Xelaev18014692m.g|	159	C	11	0	trim33.S	trim33.S	1057	0	4	7	0	6	1	0	4	4	0	4	3
mi|Xelaev18012007m.g|	159	C	9	22	trim33.L	trim33.L	1091	0	5	5	0	6	2	0	3	4	0	4	2
mi|Xelaev18042888m.g|	160	C	0	1	Xelaev18042888m.g	Xelaev18042888m.g	508	0	0	0	0	0	0	0	0	0	0	0	1
mi|Xelaev18042878m.g|	160		0	0	Xelaev18042878m.g	Xelaev18042878m.g	299	0	0	0	0	0	0	0	0	0	0	0	1
mi|Xelaev18006174m.g|	161	C	90	1	wrn.L	wrn.L	1434	0	6	13	0	10	8	0	18	19	0	12	5
mi|Xelaev18022324m.g|	161		0	0	ccs.L	ccs.L	274	0	0	0	0	0	0	0	0	1	0	0	0
mi|Xelaev18014861m.g|	162	C	35	0	rpl10a.S	rpl10a.S	227	0	4	5	0	5	4	0	5	4	0	6	2
mi|Xelaev18043144m.g|	163	C	0	3	cdc6.L	cdc6.L	645	0	0	2	0	1	0	0	0	0	0	0	0
mi|Xelaev18045905m.g|	163		0	0	cdc6.S	cdc6.S	554	0	0	2	0	1	0	0	0	0	0	0	0
mi|Xelaev18029485m.g|	164	C	12	0	prim2.S	prim2.S	513	0	0	3	0	2	0	0	3	2	0	2	0
##mi|Xelaev18027867m.g|	165	C	1	0	####yeats2.L	####yeats2.L	1235	0	0	0	0	0	0	0	1	0	0	0	0
mi|Xelaev18010569m.g|	166	C	0	6	loc100145162.S	loc100145162.S	2911	0	1	3	0	2	0	0	0	0	0	0	0
mi|Xelaev18007733m.g|	166		0	0	loc100145162.L	loc100145162.L	2908	0	1	3	0	2	0	0	0	0	0	0	0
mi|Xelaev18023753m.g|	167	C	12	0	atrip.L	atrip.L	798	0	1	4	0	4	3	0	4	3	0	5	2
mi|Xelaev18025739m.g|	167	C	15	14	atrip.S	atrip.S	801	0	1	5	0	4	2	0	5	4	0	5	3
mi|Xelaev18026161m.g|	168	C	1	0	haao.L	haao.L	282	0	0	0	0	1	0	0	0	0	0	0	0
mi|Xelaev18043138m.g|	169	C	286	16	top2a.L	top2a.L	1579	5	43	54	8	50	46	4	46	51	7	45	35
mi|Xelaev18033124m.g|	169		0	0	top2b-like.S	top2b-like.S	1695	2	14	14	4	14	11	0	12	15	1	14	9
mi|Xelaev18031056m.g|	169	C	0	94	top2b-like.L	top2b-like.L	1696	2	12	12	3	12	9	0	11	13	1	11	8
mi|Xelaev18005658m.g|	170	C	2	0	Xetrov90001099m.L	Xetrov90001099m.L	1991	0	0	2	0	0	0	0	0	0	0	0	0
mi|Xelaev18014493m.g|	171	C	2	0	ttf2.S	ttf2.S	1187	0	1	0	0	0	1	0	1	3	0	0	0
mi|Xelaev18038499m.g|	171	C	5	4	ercc6l.L	ercc6l.L	1349	0	2	2	0	0	1	0	2	2	0	0	0
mi|Xelaev18027755m.g|	171		0	0	hltf.L	hltf.L	1000	0	1	0	0	0	1	0	1	1	0	0	0
mi|Xelaev18036194m.g|	172	C	53	0	pold1.L	pold1.L	1109	0	4	6	0	6	4	0	8	11	0	9	5
mi|Xelaev18029023m.g|	173	C	2	8	phf10.S	phf10.S	527	0	0	3	0	3	2	0	1	0	0	1	0
mi|Xelaev18026773m.g|	173		0	0	phf10.L	phf10.L	487	0	0	2	0	2	2	0	1	0	0	1	0
mi|Xelaev18023497m.g|	174		0	0	snu13.L	snu13.L	128	0	2	3	1	2	2	1	2	2	0	2	1
mi|Xelaev18025521m.g|	174	C	9	18	nhp2l1.S	nhp2l1.S	128	0	3	4	2	4	3	2	3	3	0	2	1
sp|A6NMY6|AXA2L_HUMAN_contaminant	175	C	16	0	Putative annexin A2-like protein OS=Homo sapiens GN=ANXA2P2 PE=5 SV=2	Putative annexin A2-like protein OS=Homo sapiens GN=ANXA2P2 PE=5 SV=2	339	0	2	0	2	1	0	0	3	3	0	4	1
mi|Xelaev18045249m.g|	176	C	5	0	Xelaev18045249m.g	Xelaev18045249m.g	200	0	1	0	0	0	1	0	1	0	0	1	1
mi|Xelaev18034300m.g|	177	C	1	17	tial1.L	tial1.L	449	0	1	3	0	3	2	0	2	2	0	3	2
mi|Xelaev18036677m.g|	177	C	4	0	tial1.S	tial1.S	351	0	0	2	0	2	2	0	2	1	0	3	1
mi|Xelaev18020360m.g|	177		0	0	Xelaev18020360m.g	Xelaev18020360m.g	434	0	1	1	0	1	1	0	1	1	0	2	1
mi|Xelaev18018533m.g|	177	C	2	1	tia1.L	tia1.L	389	0	1	1	0	2	1	0	1	1	0	3	1
mi|Xelaev18041060m.g|	178	C	2	16	srsf5.S	srsf5.S	280	0	3	3	0	2	1	1	2	3	1	1	1
mi|Xelaev18039959m.g|	178		0	0	krt5.1-like.2.L	krt5.1-like.2.L	302	0	2	2	0	2	1	1	2	2	1	1	1
mi|Xelaev18039908m.g|	178		0	0	srsf5.L	srsf5.L	279	0	2	3	0	2	1	1	2	2	1	1	1
mi|Xelaev18041035m.g|	178		0	0	krt5.1-like.2.S	krt5.1-like.2.S	261	0	2	2	0	2	1	1	2	2	1	1	1
mi|Xelaev18027287m.g|	179	C	0	5	srsf12.L	srsf12.L	279	0	1	1	0	0	0	0	1	0	0	2	0
mi|Xelaev18029388m.g|	179		0	0	srsf12.S	srsf12.S	262	0	1	1	0	0	0	0	1	0	0	2	0
mi|Xelaev18003217m.g|	179		0	0	srsf10.S	srsf10.S	258	0	1	1	0	0	0	0	1	0	0	1	0
mi|Xelaev18000112m.g|	179		0	0	srsf10.L	srsf10.L	256	0	1	1	0	0	0	0	1	0	0	1	0
mi|Xelaev18044404m.g|	180	C	43	0	ercc3.L	ercc3.L	785	0	5	8	0	5	4	0	7	8	0	5	1
mi|Xelaev18037286m.g|	181	C	21	145	hspa8.S	hspa8.S	650	5	19	23	12	17	23	11	21	23	6	18	18
mi|Xelaev18035213m.g|	181	C	21	0	hspa8.L	hspa8.L	646	5	19	24	11	18	24	10	21	22	6	18	18
mi|Xelaev18039768m.g|	181	C	10	0	hspa2.L	hspa2.L	634	4	7	6	5	6	7	5	6	5	3	6	5
mi|Xelaev18004173m.g|	181		0	0	loc100488052.S	loc100488052.S	204	1	1	2	1	1	1	0	1	2	0	1	1
mi|Xelaev18038451m.g|	181	C	0	46	hspa5.L	hspa5.L	658	1	4	8	1	5	4	3	5	4	1	6	4
mi|Xelaev18041802m.g|	181		0	0	hspa5.S	hspa5.S	655	1	4	8	1	5	4	3	5	4	1	6	4
mi|Xelaev18025280m.g|	182	C	0	5	prpf38a.S	prpf38a.S	445	0	1	0	0	0	0	0	1	0	0	3	0
mi|Xelaev18023179m.g|	182		0	0	prpf38a.L	prpf38a.L	382	0	1	0	0	0	0	0	1	0	0	3	0
mi|Xelaev18026597m.g|	183	C	4	0	polr1b.L	polr1b.L	1135	0	0	3	0	0	0	0	0	0	0	1	0
mi|Xelaev18046180m.g|	184	C	5	0	adnp.S	adnp.S	1093	0	5	5	0	3	3	0	2	4	0	3	0
mi|Xelaev18043449m.g|	184	C	9	20	adnp.L	adnp.L	1097	0	5	6	0	4	2	0	3	5	0	4	0
mi|Xelaev18042736m.g|	185	C	15	0	prpf3.S	prpf3.S	632	0	1	3	0	4	2	0	2	2	0	1	0
mi|Xelaev18042434m.g|	186	C	6	0	rnf5.S	rnf5.S	205	0	1	1	0	1	1	0	1	1	0	0	0
mi|Xelaev18037480m.g|	187	C	0	22	Xelaev18037480m.g	Xelaev18037480m.g	483	0	2	1	2	2	2	3	3	1	2	2	2
mi|Xelaev18035585m.g|	187		0	0	Xelaev18035585m.g	Xelaev18035585m.g	434	0	2	1	2	2	2	3	3	1	2	2	2
mi|Xelaev18019512m.g|	187	C	10	0	Xelaev18019512m.g	Xelaev18019512m.g	434	0	2	1	2	2	3	3	2	1	1	3	3
sp|P81605|DCD_HUMAN_contaminant	188	C	18	0	Dermcidin OS=Homo sapiens GN=DCD PE=1 SV=2	Dermcidin OS=Homo sapiens GN=DCD PE=1 SV=2	91	1	2	1	1	2	1	0	2	2	2	3	1
mi|Xelaev18047436m.g|	189	C	11	7	kpna7.S	kpna7.S	522	0	1	4	0	4	2	0	1	3	0	3	0
mi|Xelaev18045061m.g|	189		0	0	kpna7.L	kpna7.L	523	0	0	2	0	2	0	0	0	2	0	1	0
mi|Xelaev18008057m.g|	190	C	9	28	ell2.L	ell2.L	630	0	5	10	0	4	3	0	5	5	0	4	1
mi|Xelaev18010811m.g|	190	C	7	0	ell2.S	ell2.S	630	0	6	8	0	4	3	0	4	5	0	4	1
mi|Xelaev18022463m.g|	191	C	42	0	brd7.L	brd7.L	638	0	8	6	0	5	4	0	4	7	0	5	3
mi|Xelaev18026673m.g|	192	C	15	0	loc100488246.L	loc100488246.L	590	0	1	3	0	2	1	0	2	3	0	2	1
mi|Xelaev18012026m.g|	193	C	28	33	thrap3.L	thrap3.L	906	2	6	6	4	6	5	5	6	6	3	6	6
mi|Xelaev18015131m.g|	193	C	13	0	thrap3.S	thrap3.S	652	0	5	5	4	5	2	4	5	5	3	4	4
mi|Xelaev18001015m.g|	194	C	2	0	pfn1.S	pfn1.S	137	0	0	1	0	0	0	0	0	1	0	0	0
mi|Xelaev18012706m.g|	195	C	0	68	rbbp7.L	rbbp7.L	425	0	9	11	0	10	8	0	7	8	0	10	5
mi|Xelaev18015328m.g|	195		0	0	rbbp7.S	rbbp7.S	425	0	9	11	0	10	8	0	7	8	0	10	5
mi|Xelaev18004046m.g|	195	C	0	1	rbbp4.S	rbbp4.S	425	0	4	4	0	4	3	0	3	5	0	4	2
mi|Xelaev18012612m.g|	195		0	0	rbbp4.L	rbbp4.L	425	0	4	4	0	4	3	0	3	5	0	4	2
mi|Xelaev18029392m.g|	196	C	15	0	orc3.S	orc3.S	709	0	2	4	0	2	2	0	2	0	0	2	1
mi|Xelaev18020022m.g|	197	C	5	16	Xelaev18020022m.g	Xelaev18020022m.g	300	0	2	3	0	2	3	0	2	3	0	3	3
mi|Xelaev18016933m.g|	197		0	0	Xelaev18016933m.g	Xelaev18016933m.g	299	0	2	2	0	2	2	0	2	2	0	2	2
mi|Xelaev18004814m.g|	197		0	0	Xelaev18004814m.g	Xelaev18004814m.g	276	0	2	2	0	2	2	0	2	2	0	2	2
mi|Xelaev18045242m.g|	198	C	13	0	ints1.L	ints1.L	2191	0	1	5	0	1	1	0	0	3	0	2	0
mi|Xelaev18042294m.g|	199	C	0	15	taf9b.S	taf9b.S	277	0	2	4	0	3	0	0	2	2	0	2	0
mi|Xelaev18038968m.g|	199		0	0	taf9b.L	taf9b.L	254	0	2	4	0	3	0	0	2	2	0	2	0
mi|Xelaev18022228m.g|	200	C	4	2	rcor2.L	rcor2.L	503	0	0	2	0	2	1	0	1	0	0	0	0
mi|Xelaev18028725m.g|	200		0	0	rcor3.S	rcor3.S	559	0	0	1	0	1	0	0	0	0	0	0	0
mi|Xelaev18026177m.g|	200		0	0	rcor3.L	rcor3.L	535	0	0	1	0	1	0	0	0	0	0	0	0
mi|Xelaev18041183m.g|	200		0	0	rcor1.S	rcor1.S	432	0	0	1	0	1	0	0	0	0	0	0	0
mi|Xelaev18039709m.g|	200		0	0	rcor1.L	rcor1.L	431	0	0	1	0	1	0	0	0	0	0	0	0
mi|Xelaev18009347m.g|	201	C	1	30	gar1.S	gar1.S	228	1	4	4	2	3	2	2	3	3	0	4	3
mi|Xelaev18005651m.g|	201		0	0	gar1.L	gar1.L	223	1	3	4	2	3	2	2	3	3	0	4	3
mi|Xelaev18022345m.g|	202	C	11	0	men1.L	men1.L	675	0	2	2	0	3	3	0	1	0	0	0	0
mi|Xelaev18012537m.g|	203		0	0	hdac1.L	hdac1.L	480	1	6	11	0	6	7	1	6	5	1	6	4
mi|Xelaev18015210m.g|	203	C	14	21	hdac1.S	hdac1.S	480	1	7	12	0	7	7	1	7	6	1	7	4
mi|Xelaev18027167m.g|	203	C	0	45	hdac2.L	hdac2.L	488	1	6	9	0	5	6	1	4	5	1	5	2
mi|Xelaev18029255m.g|	203		0	0	hdac2.S	hdac2.S	467	1	6	9	0	5	6	1	4	5	1	5	2
mi|Xelaev18021566m.g|	203		0	0	hdac3.S	hdac3.S	405	0	1	1	0	1	1	0	1	1	0	1	1
mi|Xelaev18036986m.g|	204	C	2	0	ddx21.S	ddx21.S	759	0	1	0	0	1	0	0	0	0	0	0	0
mi|Xelaev18017321m.g|	205	C	0	3	eif4e-like.1.L	eif4e-like.1.L	246	0	0	0	0	0	0	0	0	2	0	1	0
mi|Xelaev18021360m.g|	205		0	0	eif4e-like.1.S	eif4e-like.1.S	217	0	0	0	0	0	0	0	0	2	0	1	0
mi|Xelaev18007016m.g|	206	C	0	2	irf9.L	irf9.L	494	0	1	0	0	0	0	0	1	0	0	0	0
mi|Xelaev18010212m.g|	206		0	0	irf9.S	irf9.S	433	0	1	0	0	0	0	0	1	0	0	0	0
mi|Xelaev18028768m.g|	207	C	0	9	calm2.S	calm2.S	149	0	1	2	0	1	1	0	1	1	0	1	1
mi|Xelaev18041325m.g|	207		0	0	calm1.S	calm1.S	149	0	1	2	0	1	1	0	1	1	0	1	1
mi|Xelaev18026129m.g|	207		0	0	calm2.L	calm2.L	149	0	1	2	0	1	1	0	1	1	0	1	1
mi|Xelaev18039534m.g|	207		0	0	calm1.L	calm1.L	149	0	1	2	0	1	1	0	1	1	0	1	1
sp|P01833|PIGR_HUMAN_contaminant	208	C	4	0	Polymeric immunoglobulin receptor OS=Homo sapiens GN=PIGR PE=1 SV=4	Polymeric immunoglobulin receptor OS=Homo sapiens GN=PIGR PE=1 SV=4	764	0	0	0	0	0	0	0	0	3	0	1	0
mi|Xelaev18044415m.g|	209	C	84	7	smarcal1.L	smarcal1.L	960	0	7	13	0	13	11	0	13	13	0	12	9
mi|Xelaev18005359m.g|	209		0	0	acsl1.L	acsl1.L	744	0	1	1	0	0	1	0	1	1	0	1	1
mi|Xelaev18009125m.g|	209		0	0	acsl1.S	acsl1.S	728	0	1	1	0	0	1	0	1	1	0	1	1
mi|Xelaev18035698m.g|	210	C	15	0	ppih.L	ppih.L	218	0	1	2	0	2	2	0	1	2	0	3	2
mi|Xelaev18036567m.g|	211	C	4	81	fbl.L	fbl.L	327	1	12	13	4	9	5	3	10	9	2	10	7
mi|Xelaev18038075m.g|	211		0	0	fbl.S	fbl.S	320	1	10	12	4	9	5	3	10	9	2	9	7
mi|Xelaev18045402m.g|	212	C	0	2	Xelaev18045402m.g	Xelaev18045402m.g	309	0	0	2	0	0	0	0	0	0	0	0	0
mi|Xelaev18047679m.g|	212		0	0	Xelaev18047679m.g	Xelaev18047679m.g	308	0	0	2	0	0	0	0	0	0	0	0	0
mi|Xelaev18045256m.g|	213	C	0	29	ube2i.L	ube2i.L	200	0	3	4	0	4	3	0	3	4	0	4	4
mi|Xelaev18047568m.g|	213		0	0	ube2i.S	ube2i.S	158	0	3	4	0	4	3	0	3	4	0	4	4
mi|Xelaev18037633m.g|	214	C	5	15	trim28.S	trim28.S	798	0	2	4	0	2	2	0	3	5	0	2	0
mi|Xelaev18035836m.g|	214	C	2	0	trim28.L	trim28.L	795	0	2	4	0	2	1	0	2	4	0	2	0
mi|Xelaev18005899m.g|	215	C	10	0	cenpc.L	cenpc.L	1400	0	2	6	0	0	0	0	0	0	0	2	0
mi|Xelaev18026534m.g|	216	C	29	0	fancl.L	fancl.L	361	0	3	4	0	4	4	0	4	4	0	3	3
mi|Xelaev18013308m.g|	217		0	0	ddx23.L	ddx23.L	804	0	3	2	0	1	2	0	2	0	0	2	0
mi|Xelaev18015819m.g|	217	C	3	12	ddx23.S	ddx23.S	802	0	3	3	0	1	2	0	2	1	0	3	0
mi|Xelaev18018872m.g|	218	C	2	25	ash2l.L	ash2l.L	592	0	4	6	0	4	2	0	3	3	0	2	3
mi|Xelaev18020129m.g|	218	C	1	0	ash2l.S	ash2l.S	590	0	4	6	0	3	2	0	3	3	0	2	3
mi|Xelaev18000887m.g|	219		0	0	aurkb.S	aurkb.S	368	0	2	4	0	2	1	0	2	4	0	2	1
mi|Xelaev18019208m.g|	219	C	8	18	aurkb.L	aurkb.L	361	0	3	7	0	2	2	0	2	6	0	3	1
mi|Xelaev18041273m.g|	220	C	17	0	vrk1.S	vrk1.S	406	0	6	6	0	3	3	0	6	6	0	7	2
mi|Xelaev18039592m.g|	220	C	31	22	vrk1.L	vrk1.L	409	0	9	9	0	5	4	0	6	7	0	8	5
mi|Xelaev18027334m.g|	221	C	1	0	Xelaev18027334m.g	Xelaev18027334m.g	587	0	0	0	0	1	0	0	0	0	0	0	0
mi|Xelaev18015869m.g|	222	C	0	4	rps26.S	rps26.S	115	0	0	1	0	0	1	0	1	0	0	1	0
mi|Xelaev18013370m.g|	222		0	0	rps26.L	rps26.L	115	0	0	1	0	0	1	0	1	0	0	1	0
mi|Xelaev18024204m.g|	223		0	0	mta2.S	mta2.S	848	0	4	7	0	7	4	0	2	4	0	4	3
mi|Xelaev18022251m.g|	223	C	1	35	mta2.L	mta2.L	724	0	4	7	0	8	4	0	2	4	0	4	3
mi|Xelaev18040095m.g|	223		0	0	mta1.L	mta1.L	624	0	0	1	0	0	0	0	0	0	0	0	0
mi|Xelaev18006502m.g|	224	C	8	7	anp32b.L	anp32b.L	266	0	1	3	0	2	2	0	3	2	0	2	0
mi|Xelaev18018469m.g|	224		0	0	anp32a.L	anp32a.L	244	0	0	2	0	2	1	0	1	1	0	0	0
mi|Xelaev18020413m.g|	224		0	0	anp32a.S	anp32a.S	244	0	0	1	0	2	1	0	1	1	0	0	0
mi|Xelaev18028081m.g|	225	C	50	0	Xelaev18028081m.g	Xelaev18028081m.g	1128	0	2	4	0	6	6	0	9	9	0	8	6
mi|Xelaev18013289m.g|	226	C	1	0	grasp.L	grasp.L	351	0	0	0	0	0	0	0	0	0	0	1	0
sp|P05089|ARGI1_HUMAN_contaminant	227	C	5	1	Arginase-1 OS=Homo sapiens GN=ARG1 PE=1 SV=2	Arginase-1 OS=Homo sapiens GN=ARG1 PE=1 SV=2	322	0	0	0	1	0	0	0	0	2	0	3	0
mi|Xelaev18026971m.g|	227		0	0	arg1.L	arg1.L	350	0	0	0	0	0	0	0	0	1	0	0	0
mi|Xelaev18010151m.g|	228		0	0	hnrnpk.S	hnrnpk.S	399	0	1	3	1	4	2	0	4	6	0	3	2
mi|Xelaev18006931m.g|	228	C	2	26	hnrnpk.L	hnrnpk.L	399	0	2	4	1	4	2	0	4	6	0	3	2
mi|Xelaev18011978m.g|	229	C	0	2	Xelaev18011978m.g	Xelaev18011978m.g	135	0	1	1	0	0	0	0	0	0	0	0	0
mi|Xelaev18014665m.g|	229		0	0	Xelaev18014665m.g	Xelaev18014665m.g	111	0	1	1	0	0	0	0	0	0	0	0	0
mi|Xelaev18017170m.g|	230	C	61	15	rad50.L	rad50.L	1312	0	8	9	0	13	8	0	12	12	0	10	4
mi|Xelaev18021479m.g|	230		0	0	rad50.S	rad50.S	1311	0	1	1	0	2	1	0	2	4	0	3	1
mi|Xelaev18034801m.g|	231	C	101	33	hells.L	hells.L	838	0	19	25	0	18	19	0	16	16	0	12	9
mi|Xelaev18004506m.g|	231	C	7	0	hells.S	hells.S	584	0	6	4	0	6	7	0	4	4	0	4	3
mi|Xelaev18043542m.g|	231		0	0	edn3.L	edn3.L	127	0	1	0	0	0	0	0	1	0	0	0	0
mi|Xelaev18025032m.g|	232	C	16	8	cdca9.S	cdca9.S	296	0	1	3	0	3	3	0	4	4	0	3	3
mi|Xelaev18022771m.g|	232		0	0	cdca9.L	cdca9.L	218	0	1	1	0	1	1	0	1	1	0	1	1
mi|Xelaev18039722m.g|	233	C	4	0	ckb.L	ckb.L	381	0	0	0	1	0	1	1	0	0	1	0	0
mi|Xelaev18016951m.g|	234	C	8	0	jade2.L	jade2.L	854	0	0	3	0	1	0	0	1	2	0	1	0
sp|P06702|S10A9_HUMAN_contaminant	235	C	33	0	Protein S100-A9 OS=Homo sapiens GN=S100A9 PE=1 SV=1	Protein S100-A9 OS=Homo sapiens GN=S100A9 PE=1 SV=1	114	0	1	0	1	2	3	0	8	8	1	6	3
mi|Xelaev18013640m.g|	236	C	6	44	smarcd1.L	smarcd1.L	540	0	6	10	0	8	5	0	6	5	0	7	3
mi|Xelaev18003165m.g|	236		0	0	Xelaev18003165m.g	Xelaev18003165m.g	518	0	2	5	0	4	2	0	3	3	0	3	2
mi|Xelaev18016094m.g|	236		0	0	smarcd1.S	smarcd1.S	509	0	5	9	0	7	4	0	5	5	0	6	3
mi|Xelaev18043363m.g|	236	C	1	13	smarcd2.L	smarcd2.L	481	0	4	5	0	5	5	0	5	5	0	2	3
mi|Xelaev18046104m.g|	236	C	18	0	smarcd2.S	smarcd2.S	481	0	7	9	0	7	7	0	6	7	0	5	3
mi|Xelaev18032594m.g|	236		0	0	Xelaev18032594m.g	Xelaev18032594m.g	468	0	2	5	0	4	2	0	3	3	0	3	2
mi|Xelaev18038552m.g|	237	C	68	0	dkc1.L	dkc1.L	558	0	9	13	1	8	4	2	7	7	1	9	7
mi|Xelaev18008092m.g|	238	C	12	0	ccnh.L	ccnh.L	323	0	2	3	0	1	2	0	2	0	0	1	1
sp|P07339|CATD_HUMAN_contaminant	239	C	4	0	Cathepsin D OS=Homo sapiens GN=CTSD PE=1 SV=1	Cathepsin D OS=Homo sapiens GN=CTSD PE=1 SV=1	412	0	0	0	0	0	0	0	0	2	0	2	0
mi|Xelaev18019341m.g|	240	C	1	0	wrap53.L	wrap53.L	654	0	0	1	0	0	0	0	0	0	0	0	0
mi|Xelaev18046308m.g|	241	C	3	6	birc7.S	birc7.S	401	0	1	1	0	1	1	0	3	1	0	0	1
mi|Xelaev18043578m.g|	241		0	0	birc7.L	birc7.L	407	0	0	1	0	1	1	0	1	1	0	0	1
mi|Xelaev18034244m.g|	242	C	27	0	dclre1a.L	dclre1a.L	932	0	1	3	0	3	3	0	5	5	0	5	2
mi|Xelaev18016291m.g|	243	C	143	1	npat.S	npat.S	1304	0	19	24	0	19	18	0	21	16	0	15	12
##mi|Xelaev18005300m.g|	243		0	0	####cep135.L	####cep135.L	1173	0	0	1	0	0	0	0	0	0	0	0	0
mi|Xelaev18006932m.g|	244	C	22	0	rmi1.L	rmi1.L	512	0	3	4	0	3	0	0	4	5	0	3	0
mi|Xelaev18019573m.g|	245	C	1	0	mepce.L	mepce.L	572	0	0	0	0	0	1	0	0	0	0	0	0
mi|Xelaev18043677m.g|	246	C	1	0	Xelaev18043677m.g	Xelaev18043677m.g	104	0	0	0	0	0	0	0	0	1	0	0	0
mi|Xelaev18017827m.g|	247	C	38	0	mcm10.L	mcm10.L	860	0	2	7	0	6	1	0	8	7	0	6	1
mi|Xelaev18025514m.g|	248	C	0	28	cdc73.S	cdc73.S	531	0	5	5	0	3	3	0	4	2	0	4	2
mi|Xelaev18023486m.g|	248		0	0	cdc73.L	cdc73.L	531	0	5	5	0	3	3	0	4	2	0	4	2
sp|Q08188|TGM3_HUMAN_contaminant	249	C	11	0	Protein-glutamine gamma-glutamyltransferase E OS=Homo sapiens GN=TGM3 PE=1 SV=4	Protein-glutamine gamma-glutamyltransferase E OS=Homo sapiens GN=TGM3 PE=1 SV=4	693	0	0	0	0	0	1	0	1	5	0	3	1
mi|Xelaev18030978m.g|	250	C	0	22	cbx3.L	cbx3.L	177	0	4	4	0	3	2	0	3	4	0	1	1
mi|Xelaev18033063m.g|	250		0	0	cbx3.S	cbx3.S	174	0	4	4	0	3	2	0	3	4	0	1	1
mi|Xelaev18024655m.g|	251	C	0	21	Xelaev18024655m.g	Xelaev18024655m.g	555	0	4	4	0	2	1	0	4	3	0	3	0
mi|Xelaev18021668m.g|	251	C	10	0	Xelaev18021668m.g	Xelaev18021668m.g	431	0	5	7	0	2	2	0	4	5	0	4	0
mi|Xelaev18021646m.g|	251		0	0	Xelaev18021646m.g	Xelaev18021646m.g	125	0	1	0	0	0	0	0	1	0	0	0	0
mi|Xelaev18015143m.g|	252	C	12	0	clspn.S	clspn.S	1286	0	2	4	0	1	0	0	2	2	0	1	0
mi|Xelaev18027277m.g|	253	C	20	0	mdn1.L	mdn1.L	5606	0	4	11	0	2	0	0	1	1	0	1	0
mi|Xelaev18006121m.g|	254	C	0	9	smu1.L	smu1.L	513	0	1	2	0	2	0	0	1	0	0	2	1
mi|Xelaev18009672m.g|	254		0	0	smu1.S	smu1.S	513	0	1	2	0	2	0	0	1	0	0	2	1
mi|Xelaev18009768m.g|	255	C	18	5	cirbp.S	cirbp.S	166	0	2	3	1	3	2	1	3	3	0	3	2
mi|Xelaev18006236m.g|	255	C	9	0	cirbp.L	cirbp.L	166	0	1	2	0	2	1	0	3	3	0	2	0
mi|Xelaev18024322m.g|	256	C	80	0	ddb1.S	ddb1.S	1140	0	11	16	0	10	7	0	9	12	0	8	7
mi|Xelaev18017340m.g|	257	C	1	2	brd8.L	brd8.L	934	0	2	0	0	1	0	0	0	0	0	0	0
mi|Xelaev18021340m.g|	257		0	0	brd8.S	brd8.S	807	0	1	0	0	1	0	0	0	0	0	0	0
mi|Xelaev18026481m.g|	258	C	0	11	ppp3r1.L	ppp3r1.L	170	0	3	2	0	1	1	0	1	2	0	1	0
mi|Xelaev18028508m.g|	258		0	0	ppp3r1.S	ppp3r1.S	170	0	3	2	0	1	1	0	1	2	0	1	0
mi|Xelaev18008207m.g|	259	C	12	0	cdk7.L	cdk7.L	365	0	0	3	0	2	1	0	2	2	0	1	1
mi|Xelaev18011173m.g|	260	C	73	157	vcp.S	vcp.S	805	15	23	23	12	22	17	14	24	21	13	25	21
mi|Xelaev18008548m.g|	260	C	26	0	vcp.L	vcp.L	746	14	19	18	7	18	16	10	17	19	9	20	16
mi|Xelaev18008472m.g|	260		0	0	katnal2.L	katnal2.L	542	1	1	1	0	1	1	0	1	1	0	1	1
mi|Xelaev18012458m.g|	261	C	4	29	zmym4.L	zmym4.L	1462	0	6	6	0	4	3	0	4	5	0	4	1
mi|Xelaev18015150m.g|	261		0	0	zmym4.S	zmym4.S	1461	0	5	5	0	4	3	0	3	4	0	4	1
mi|Xelaev18015838m.g|	262	C	0	11	tuba1b.S	tuba1b.S	451	0	1	0	0	2	2	0	1	1	0	2	2
mi|Xelaev18044475m.g|	262		0	0	loc100490289-like.L	loc100490289-like.L	451	0	1	0	0	2	2	0	1	1	0	2	2
mi|Xelaev18013328m.g|	262		0	0	tuba4a.L	tuba4a.L	451	0	1	0	0	2	2	0	1	1	0	2	2
mi|Xelaev18013329m.g|	262		0	0	tuba1b.L	tuba1b.L	451	0	1	0	0	2	2	0	1	1	0	2	2
mi|Xelaev18015837m.g|	262		0	0	tuba4a.S	tuba4a.S	451	0	1	0	0	2	2	0	1	1	0	2	2
mi|Xelaev18015839m.g|	262		0	0	tuba1c.S	tuba1c.S	449	0	1	0	0	2	2	0	1	1	0	2	2
mi|Xelaev18013330m.g|	262		0	0	tuba1c.L	tuba1c.L	449	0	1	0	0	2	2	0	1	1	0	2	2
mi|Xelaev18017873m.g|	262		0	0	MGC97820.L	MGC97820.L	434	0	1	0	0	1	1	0	1	1	0	1	1
mi|Xelaev18047015m.g|	262		0	0	loc100497528.S	loc100497528.S	416	0	1	0	0	2	2	0	1	1	0	2	2
mi|Xelaev18044474m.g|	262		0	0	loc100497528.L	loc100497528.L	402	0	1	0	0	2	2	0	1	1	0	2	2
mi|Xelaev18044451m.g|	262		0	0	tubal3.L	tubal3.L	453	0	0	0	0	1	1	0	0	0	0	1	1
mi|Xelaev18044485m.g|	262		0	0	Xetrov90024521m.L	Xetrov90024521m.L	453	0	0	0	0	1	1	0	0	0	0	1	1
mi|Xelaev18047021m.g|	262		0	0	Xelaev18047021m.g	Xelaev18047021m.g	452	0	0	0	0	1	1	0	0	0	0	1	1
mi|Xelaev18047022m.g|	262		0	0	Xelaev18047022m.g	Xelaev18047022m.g	452	0	0	0	0	1	1	0	0	0	0	1	1
mi|Xelaev18015006m.g|	262		0	0	tuba3c.S	tuba3c.S	450	0	0	0	0	1	1	0	0	0	0	1	1
mi|Xelaev18012172m.g|	262		0	0	tuba3c.L	tuba3c.L	449	0	0	0	0	1	1	0	0	0	0	1	1
mi|Xelaev18044473m.g|	262		0	0	tuba4b.L	tuba4b.L	448	0	0	0	0	1	1	0	0	0	0	1	1
mi|Xelaev18047014m.g|	262		0	0	tuba4b.S	tuba4b.S	434	0	0	0	0	1	1	0	0	0	0	1	1
mi|Xelaev18044483m.g|	262		0	0	Xelaev18044483m.g	Xelaev18044483m.g	429	0	0	0	0	1	1	0	0	0	0	1	1
mi|Xelaev18047001m.g|	262		0	0	tubal3.S	tubal3.S	404	0	0	0	0	1	1	0	0	0	0	1	1
mi|Xelaev18003966m.g|	263	C	0	9	Xelaev18003966m.g	Xelaev18003966m.g	191	0	1	1	0	1	1	0	2	1	0	1	1
mi|Xelaev18036222m.g|	263		0	0	Xelaev18036222m.g	Xelaev18036222m.g	145	0	1	1	0	1	1	0	2	1	0	1	1
mi|Xelaev18020681m.g|	264	C	3	6	sltm.S	sltm.S	1014	0	1	0	0	2	1	0	3	1	0	1	0
mi|Xelaev18018159m.g|	264		0	0	sltm.L	sltm.L	1009	0	1	0	0	1	1	0	2	0	0	1	0
mi|Xelaev18038679m.g|	265	C	44	0	loc100495263.L	loc100495263.L	974	0	7	10	0	7	4	0	5	3	0	4	4
mi|Xelaev18039950m.g|	266	C	36	42	baz1a.L	baz1a.L	1567	0	11	15	0	13	9	0	11	10	0	6	3
mi|Xelaev18041041m.g|	266	C	1	0	baz1a.S	baz1a.S	1564	0	7	8	0	8	6	0	4	5	0	2	3
mi|Xelaev18046049m.g|	267	C	29	105	ubtf.S	ubtf.S	701	0	16	18	0	19	15	0	17	17	0	17	15
mi|Xelaev18043286m.g|	267	C	33	0	ubtf.L	ubtf.L	677	0	16	19	0	19	15	0	19	18	0	17	15
mi|Xelaev18010325m.g|	268	C	9	7	hnrnpc.S	hnrnpc.S	283	0	0	4	1	3	0	0	2	3	0	2	1
mi|Xelaev18007378m.g|	268	C	1	0	hnrnpc.L	hnrnpc.L	282	0	1	2	0	2	0	0	1	1	0	1	0
mi|Xelaev18008967m.g|	269	C	0	5	dhx15.S	dhx15.S	763	0	0	3	0	0	0	0	0	1	0	1	0
mi|Xelaev18005175m.g|	269		0	0	dhx15.L	dhx15.L	761	0	0	3	0	0	0	0	0	1	0	1	0
mi|Xelaev18014582m.g|	270	C	0	19	ywhae.S	ywhae.S	255	1	3	2	2	1	2	1	1	2	0	2	2
mi|Xelaev18011887m.g|	270		0	0	ywhae.L	ywhae.L	233	1	3	2	2	1	2	1	1	2	0	2	2
mi|Xelaev18010485m.g|	270		0	0	ywhah.S	ywhah.S	247	0	1	1	1	1	1	0	1	1	0	1	1
mi|Xelaev18007588m.g|	270		0	0	ywhah.L	ywhah.L	247	0	1	1	1	1	1	0	1	1	0	1	1
mi|Xelaev18015318m.g|	270		0	0	ywhag.S	ywhag.S	247	0	1	1	1	1	1	0	1	1	0	1	1
mi|Xelaev18012695m.g|	270		0	0	ywhag.L	ywhag.L	247	0	1	1	1	1	1	0	1	1	0	1	1
mi|Xelaev18030074m.g|	270		0	0	ywhaq.S	ywhaq.S	246	0	1	1	1	1	1	0	1	1	0	1	1
mi|Xelaev18028033m.g|	270		0	0	ywhaq.L	ywhaq.L	246	0	1	1	1	1	1	0	1	1	0	1	1
mi|Xelaev18033916m.g|	270		0	0	ywhaz.S	ywhaz.S	245	0	1	1	1	1	1	0	1	1	0	1	1
mi|Xelaev18032253m.g|	270		0	0	ywhaz.L	ywhaz.L	245	0	1	1	1	1	1	0	1	1	0	1	1
mi|Xelaev18043238m.g|	270		0	0	ywhab.L	ywhab.L	244	0	1	1	1	1	1	0	1	1	0	1	1
mi|Xelaev18045999m.g|	270		0	0	ywhab.S	ywhab.S	244	0	1	1	1	1	1	0	1	1	0	1	1
mi|Xelaev18046866m.g|	271	C	0	3	kpna2.S	kpna2.S	526	0	1	2	0	0	0	0	0	0	0	0	0
mi|Xelaev18044267m.g|	271		0	0	kpna2.L	kpna2.L	526	0	1	2	0	0	0	0	0	0	0	0	0
mi|Xelaev18031210m.g|	272	C	3	0	mcm6.L	mcm6.L	821	0	1	2	0	0	0	0	0	0	0	0	0
mi|Xelaev18029577m.g|	273	C	36	84	ncl.S	ncl.S	705	1	13	13	6	14	12	7	13	13	2	13	13
mi|Xelaev18003255m.g|	273	C	25	0	ncl.L	ncl.L	632	1	11	13	5	13	13	5	12	11	2	12	11
mi|Xelaev18047345m.g|	274	C	39	0	orc2.S	orc2.S	558	0	6	9	0	5	6	0	6	3	0	3	1
mi|Xelaev18044939m.g|	275	C	2	96	nop58.L	nop58.L	534	3	12	13	3	9	11	3	12	12	0	11	9
mi|Xelaev18047360m.g|	275	C	17	0	nop58.S	nop58.S	475	4	14	14	5	11	13	3	14	12	0	13	10
mi|Xelaev18044305m.g|	276	C	0	9	rps11.L	rps11.L	158	0	2	1	0	1	1	0	1	1	0	1	1
mi|Xelaev18046891m.g|	276		0	0	rps11.S	rps11.S	155	0	2	1	0	1	1	0	1	1	0	1	1
mi|Xelaev18003793m.g|	276		0	0	Xelaev18003793m.g	Xelaev18003793m.g	114	0	1	0	0	0	0	0	0	0	0	0	0
mi|Xelaev18035230m.g|	277	C	34	0	ncapd3.L	ncapd3.L	1492	0	4	6	0	5	4	0	6	4	0	5	0
mi|Xelaev18012521m.g|	278	C	18	0	loc100498165-like.L	loc100498165-like.L	253	0	2	2	0	3	2	0	2	3	0	3	1
mi|Xelaev18007581m.g|	279	C	1	21	eif4enif1.L	eif4enif1.L	956	0	3	5	0	3	3	0	2	3	0	2	1
mi|Xelaev18010480m.g|	279	C	12	0	eif4enif1.S	eif4enif1.S	953	0	6	7	0	6	3	0	3	3	0	4	1
mi|Xelaev18047410m.g|	280	C	32	0	pms1.S	pms1.S	925	0	0	0	0	0	0	0	12	13	0	3	4
mi|Xelaev18032341m.g|	281	C	0	2	atad2.L	atad2.L	1344	0	0	1	0	1	0	0	0	0	0	0	0
mi|Xelaev18033988m.g|	281		0	0	atad2.S	atad2.S	1325	0	0	1	0	1	0	0	0	0	0	0	0
mi|Xelaev18026300m.g|	282	C	110	0	parp1.L	parp1.L	1011	0	15	19	0	14	14	0	14	15	0	12	7
mi|Xelaev18018359m.g|	283	C	28	6	ticrr.L	ticrr.L	1985	0	3	9	0	5	0	0	5	6	0	5	1
mi|Xelaev18020508m.g|	283		0	0	ticrr.S	ticrr.S	1968	0	0	1	0	1	0	0	1	1	0	1	1
mi|Xelaev18005728m.g|	284	C	0	32	ppp3ca.L	ppp3ca.L	530	0	4	5	0	4	4	0	4	4	0	4	3
mi|Xelaev18009418m.g|	284		0	0	ppp3ca.S	ppp3ca.S	518	0	4	5	0	4	4	0	4	4	0	4	3
mi|Xelaev18004502m.g|	284	C	6	14	ppp3cc.S	ppp3cc.S	511	0	6	7	0	6	6	0	5	6	0	5	4
mi|Xelaev18018764m.g|	284		0	0	ppp3cb.L	ppp3cb.L	507	0	2	3	0	2	2	0	2	2	0	2	2
mi|Xelaev18034807m.g|	284		0	0	ppp3cc.L	ppp3cc.L	501	0	5	6	0	5	5	0	4	5	0	5	4
mi|Xelaev18020189m.g|	284		0	0	ppp3cb.S	ppp3cb.S	489	0	1	3	0	1	1	0	1	1	0	1	1
mi|Xelaev18032172m.g|	285	C	26	0	nbn.L	nbn.L	762	0	2	5	0	3	1	0	4	6	0	3	2
mi|Xelaev18043149m.g|	286	C	0	6	msl1.L	msl1.L	491	0	1	1	0	1	1	0	1	1	0	0	0
mi|Xelaev18045912m.g|	286		0	0	msl1.S	msl1.S	488	0	1	1	0	1	1	0	1	1	0	0	0
mi|Xelaev18004598m.g|	287	C	2	2	hnrnpa0.L	hnrnpa0.L	308	0	3	2	0	3	1	0	1	4	0	2	0
mi|Xelaev18016014m.g|	287	C	0	16	hnrnpa1.S	hnrnpa1.S	398	1	3	0	1	4	1	0	1	2	0	2	1
mi|Xelaev18013553m.g|	287		0	0	hnrnpa1.L	hnrnpa1.L	358	1	3	0	1	4	1	0	1	2	0	2	1
mi|Xelaev18021532m.g|	287		0	0	hnrnpa0.S	hnrnpa0.S	308	0	3	1	0	3	1	0	1	3	0	2	0
mi|Xelaev18030977m.g|	287		0	0	hnrnpa2b1.L	hnrnpa2b1.L	423	0	3	0	0	3	1	0	1	2	0	2	0
mi|Xelaev18047194m.g|	287		0	0	hnrnpa3.S	hnrnpa3.S	384	0	3	0	0	3	1	0	1	2	0	2	0
mi|Xelaev18044730m.g|	287		0	0	hnrnpa3.L	hnrnpa3.L	370	0	3	0	0	3	1	0	1	2	0	2	0
mi|Xelaev18033062m.g|	287		0	0	hnrnpa2b1.S	hnrnpa2b1.S	346	0	3	0	0	3	1	0	1	2	0	2	0
mi|Xelaev18044702m.g|	288	C	1	0	loc100495965-like.L	loc100495965-like.L	1348	0	0	0	0	0	0	0	0	0	0	0	1
mi|Xelaev18041631m.g|	289	C	33	0	set.S	set.S	278	0	4	4	0	4	4	0	4	4	0	5	4
mi|Xelaev18029959m.g|	290	C	4	5	tfdp2.S	tfdp2.S	376	0	2	2	0	1	2	0	1	0	0	1	0
mi|Xelaev18027924m.g|	290		0	0	tfdp2.L	tfdp2.L	274	0	1	1	0	0	1	0	1	0	0	1	0
mi|Xelaev18027927m.g|	291	C	1	5	ubxn7.L	ubxn7.L	508	0	1	3	0	1	0	0	1	0	0	0	0
mi|Xelaev18029961m.g|	291		0	0	ubxn7.S	ubxn7.S	516	0	1	2	0	1	0	0	1	0	0	0	0
mi|Xelaev18029687m.g|	292	C	8	20	Xelaev18029687m.g	Xelaev18029687m.g	429	0	4	6	0	4	4	0	3	2	0	1	4
mi|Xelaev18027557m.g|	292	C	9	0	Xelaev18027557m.g	Xelaev18027557m.g	421	0	4	6	0	5	4	0	3	2	0	1	4
mi|Xelaev18001050m.g|	292		0	0	Xelaev18001050m.g	Xelaev18001050m.g	613	0	1	1	0	1	1	0	1	0	0	0	1
mi|Xelaev18007761m.g|	293	C	0	54	Xelaev18007761m.g	Xelaev18007761m.g	609	2	5	6	4	6	4	3	5	7	3	4	5
mi|Xelaev18010593m.g|	293		0	0	Xelaev18010593m.g	Xelaev18010593m.g	533	2	5	6	4	6	4	3	5	7	3	4	5
mi|Xelaev18011642m.g|	293		0	0	Xelaev18011642m.g	Xelaev18011642m.g	307	1	4	6	4	5	4	2	4	7	2	4	4
mi|Xelaev18006476m.g|	293		0	0	Xelaev18006476m.g	Xelaev18006476m.g	173	2	5	6	4	6	4	3	5	7	3	4	5
mi|Xelaev18028796m.g|	293		0	0	rps27a.S	rps27a.S	156	2	5	6	4	6	4	3	5	7	3	4	5
mi|Xelaev18026087m.g|	293		0	0	rps27a.L	rps27a.L	156	2	5	6	4	6	4	3	5	7	3	4	5
mi|Xelaev18009955m.g|	293		0	0	Xelaev18009955m.g	Xelaev18009955m.g	128	2	5	6	4	6	4	3	5	7	3	4	5
mi|Xelaev18032513m.g|	294	C	1	0	tonsl.L	tonsl.L	1423	0	0	0	0	0	0	0	0	1	0	0	0
mi|Xelaev18011610m.g|	295	C	52	0	fancb.L	fancb.L	858	0	5	8	0	7	6	0	7	8	0	5	6
mi|Xelaev18003601m.g|	296	C	1	4	Xelaev18003601m.g	Xelaev18003601m.g	105	0	0	0	0	1	0	1	1	1	0	0	1
mi|Xelaev18020271m.g|	296		0	0	loc100496569.S	loc100496569.S	329	0	0	0	0	1	0	1	0	1	0	0	1
mi|Xelaev18018628m.g|	296		0	0	loc100496569.L	loc100496569.L	152	0	0	0	0	1	0	1	0	1	0	0	1
mi|Xelaev18012800m.g|	297	C	29	0	rfc2.L	rfc2.L	359	0	3	3	0	4	3	0	5	4	0	5	2
mi|Xelaev18046713m.g|	298	C	0	34	h3f3b.S	h3f3b.S	136	0	5	4	0	4	5	0	3	4	0	4	5
mi|Xelaev18002632m.g|	298		0	0	Xelaev18002632m.g	Xelaev18002632m.g	136	0	5	4	0	4	5	0	3	4	0	4	5
mi|Xelaev18026291m.g|	298		0	0	Xelaev18026291m.g	Xelaev18026291m.g	136	0	5	4	0	4	5	0	3	4	0	4	5
mi|Xelaev18002293m.g|	298		0	0	Xelaev18002293m.g	Xelaev18002293m.g	136	0	5	4	0	4	5	0	3	4	0	4	5
mi|Xelaev18028550m.g|	298		0	0	Xelaev18028550m.g	Xelaev18028550m.g	136	0	5	4	0	4	5	0	3	4	0	4	5
mi|Xelaev18028537m.g|	298		0	0	Xelaev18028537m.g	Xelaev18028537m.g	136	0	5	4	0	4	5	0	3	4	0	4	5
mi|Xelaev18002345m.g|	298		0	0	Xelaev18002345m.g	Xelaev18002345m.g	136	0	5	4	0	4	5	0	3	4	0	4	5
mi|Xelaev18001421m.g|	298		0	0	Xelaev18001421m.g	Xelaev18001421m.g	136	0	5	4	0	4	5	0	3	4	0	4	5
mi|Xelaev18001410m.g|	298		0	0	Xelaev18001410m.g	Xelaev18001410m.g	136	0	5	4	0	4	5	0	3	4	0	4	5
mi|Xelaev18002543m.g|	298		0	0	Xelaev18002543m.g	Xelaev18002543m.g	136	0	5	4	0	4	5	0	3	4	0	4	5
mi|Xelaev18028634m.g|	298		0	0	Xelaev18028634m.g	Xelaev18028634m.g	136	0	5	4	0	4	5	0	3	4	0	4	5
mi|Xelaev18001400m.g|	298		0	0	Xelaev18001400m.g	Xelaev18001400m.g	136	0	5	4	0	4	5	0	3	4	0	4	5
mi|Xelaev18047575m.g|	298		0	0	Xelaev18047575m.g	Xelaev18047575m.g	136	0	5	4	0	4	5	0	3	4	0	4	5
mi|Xelaev18026407m.g|	298		0	0	Xelaev18026407m.g	Xelaev18026407m.g	136	0	5	4	0	4	5	0	3	4	0	4	5
mi|Xelaev18001465m.g|	298		0	0	Xelaev18001465m.g	Xelaev18001465m.g	136	0	5	4	0	4	5	0	3	4	0	4	5
mi|Xelaev18032688m.g|	298		0	0	Xelaev18032688m.g	Xelaev18032688m.g	136	0	5	4	0	4	5	0	3	4	0	4	5
mi|Xelaev18028555m.g|	298		0	0	Xelaev18028555m.g	Xelaev18028555m.g	136	0	5	4	0	4	5	0	3	4	0	4	5
mi|Xelaev18026401m.g|	298		0	0	Xelaev18026401m.g	Xelaev18026401m.g	136	0	5	4	0	4	5	0	3	4	0	4	5
mi|Xelaev18044072m.g|	298		0	0	h3f3b.L	h3f3b.L	136	0	5	4	0	4	5	0	3	4	0	4	5
mi|Xelaev18045270m.g|	298		0	0	Xelaev18045270m.g	Xelaev18045270m.g	120	0	3	2	0	2	3	0	1	2	0	2	3
mi|Xelaev18004100m.g|	298		0	0	Xelaev18004100m.g	Xelaev18004100m.g	110	0	5	4	0	4	5	0	3	4	0	4	5
mi|Xelaev18039158m.g|	298		0	0	cenpa.L	cenpa.L	150	0	1	1	0	1	1	0	1	1	0	1	1
mi|Xelaev18029878m.g|	299	C	3	8	ing5.S	ing5.S	289	0	3	3	0	1	1	0	2	1	0	0	0
mi|Xelaev18027810m.g|	299		0	0	ing5.L	ing5.L	236	0	2	2	0	1	1	0	2	0	0	0	0
mi|Xelaev18037932m.g|	300	C	24	0	Xelaev18037932m.g	Xelaev18037932m.g	581	0	3	4	0	3	3	0	3	4	0	2	2
mi|Xelaev18010209m.g|	301	C	0	2	nedd8.S	nedd8.S	125	0	0	0	0	1	1	0	0	0	0	0	0
mi|Xelaev18007009m.g|	301		0	0	nedd8.L	nedd8.L	122	0	0	0	0	1	1	0	0	0	0	0	0
mi|Xelaev18009841m.g|	302	C	0	15	anp32c.S	anp32c.S	244	0	3	2	0	2	1	0	2	2	0	3	0
mi|Xelaev18006314m.g|	302		0	0	anp32c.L	anp32c.L	240	0	3	2	0	2	1	0	2	2	0	3	0
mi|Xelaev18047692m.g|	303	C	2	17	plk1.S	plk1.S	598	0	2	2	0	4	3	0	0	4	0	4	0
mi|Xelaev18045423m.g|	303	C	13	0	plk1.L	plk1.L	598	0	4	2	0	6	4	0	1	6	0	5	2
##mi|Xelaev18025885m.g|	304	C	1	0	####chst13.S	####chst13.S	335	0	1	0	0	0	0	0	0	0	0	0	0
##mi|Xelaev18047174m.g|	305	C	0	1	####rapgef4.S	####rapgef4.S	1034	0	0	0	0	0	0	0	0	0	0	1	0
##mi|Xelaev18044704m.g|	305		0	0	####rapgef4.L	####rapgef4.L	1034	0	0	0	0	0	0	0	0	0	0	1	0
mi|Xelaev18025207m.g|	306	C	0	25	rps8.S	rps8.S	208	0	4	5	0	3	1	0	4	2	0	4	2
mi|Xelaev18023090m.g|	306		0	0	rps8.L	rps8.L	207	0	4	5	0	3	1	0	4	2	0	4	2
mi|Xelaev18015999m.g|	307	C	2	0	birc5.1.S	birc5.1.S	160	0	1	0	0	0	0	0	1	0	0	0	0
mi|Xelaev18040344m.g|	308	C	2	8	setdb1.L	setdb1.L	1343	0	2	5	0	2	0	0	0	1	0	0	0
mi|Xelaev18042716m.g|	308		0	0	setdb1.S	setdb1.S	1290	0	2	4	0	2	0	0	0	0	0	0	0
mi|Xelaev18037088m.g|	309	C	2	0	dna2.S	dna2.S	1053	0	0	0	0	0	0	0	0	1	0	1	0
mi|Xelaev18005059m.g|	310	C	1	0	nop14.L	nop14.L	877	0	0	1	0	0	0	0	0	0	0	0	0
mi|Xelaev18037678m.g|	311	C	0	6	u2af2.S	u2af2.S	466	0	0	1	0	1	1	0	0	1	0	1	1
mi|Xelaev18035897m.g|	311		0	0	u2af2.L	u2af2.L	465	0	0	1	0	1	1	0	0	1	0	1	1
mi|Xelaev18015288m.g|	312	C	1	0	ints2.S	ints2.S	1175	0	0	1	0	0	0	0	0	0	0	0	0
mi|Xelaev18028390m.g|	313		0	0	esco2.L	esco2.L	707	0	1	0	0	1	0	0	1	0	0	1	0
mi|Xelaev18030291m.g|	313	C	3	4	esco2.S	esco2.S	702	0	2	1	0	2	0	0	1	0	0	1	0
mi|Xelaev18038930m.g|	314	C	76	11	brwd3.L	brwd3.L	1770	0	11	17	0	11	9	0	13	12	0	10	4
mi|Xelaev18011434m.g|	314		0	0	brwd1.L	brwd1.L	1957	0	1	1	0	0	1	0	1	1	0	1	1
mi|Xelaev18029440m.g|	314		0	0	phip.S	phip.S	1836	0	1	1	0	1	0	0	1	0	0	0	0
mi|Xelaev18002143m.g|	314		0	0	phip.L	phip.L	1834	0	1	1	0	1	0	0	1	0	0	0	0
mi|Xelaev18038859m.g|	315	C	20	0	hmgb3.L	hmgb3.L	202	0	3	3	0	2	3	0	2	2	0	3	2
mi|Xelaev18023945m.g|	316	C	4	0	h1foo.L	h1foo.L	250	0	0	0	0	3	1	0	3	0	0	0	0
mi|Xelaev18025864m.g|	316	C	5	3	h1foo.S	h1foo.S	263	0	0	1	0	3	2	0	2	0	0	0	0
mi|Xelaev18039072m.g|	317	C	35	0	ercc2.L	ercc2.L	736	0	5	4	0	5	4	0	5	5	0	6	1
mi|Xelaev18045327m.g|	318	C	18	0	pms2.L	pms2.L	703	0	0	0	0	0	0	0	10	8	0	0	0
sp|P20930|FILA_HUMAN_contaminant	319	C	3	0	Filaggrin OS=Homo sapiens GN=FLG PE=1 SV=3	Filaggrin OS=Homo sapiens GN=FLG PE=1 SV=3	4061	0	0	0	1	0	0	0	0	1	0	1	0
mi|Xelaev18008068m.g|	320	C	1	0	slf1.L	slf1.L	904	0	0	0	0	0	0	0	0	1	0	0	0
mi|Xelaev18039799m.g|	321	C	7	1	mnat1.L	mnat1.L	309	0	2	1	0	1	1	0	1	0	0	1	1
mi|Xelaev18041134m.g|	321		0	0	mnat1.S	mnat1.S	294	0	1	0	0	0	0	0	0	0	0	0	0
mi|Xelaev18019141m.g|	322	C	1	0	pelp1.L	pelp1.L	1020	0	0	0	0	0	0	0	0	0	0	1	0
mi|Xelaev18011109m.g|	323	C	0	12	rpl17.S	rpl17.S	184	0	1	2	0	2	1	0	2	2	0	2	0
mi|Xelaev18008464m.g|	323		0	0	rpl17.L	rpl17.L	184	0	1	2	0	2	1	0	2	2	0	2	0
mi|Xelaev18011037m.g|	324	C	0	45	sub1.S	sub1.S	152	0	6	6	1	4	5	1	4	5	1	7	5
mi|Xelaev18008388m.g|	324		0	0	sub1.L	sub1.L	147	0	6	6	1	4	5	1	4	5	1	7	5
mi|Xelaev18012512m.g|	325	C	3	0	lsm10.L	lsm10.L	121	0	0	2	0	1	0	0	0	0	0	0	0
mi|Xelaev18041928m.g|	326	C	0	20	rps4x.S	rps4x.S	263	0	2	3	0	3	2	0	3	4	0	3	0
mi|Xelaev18038505m.g|	326		0	0	rps4x.L	rps4x.L	251	0	2	3	0	3	2	0	3	4	0	3	0
mi|Xelaev18023846m.g|	327	C	0	4	rbm15b.L	rbm15b.L	789	0	0	2	0	1	0	0	0	1	0	0	0
mi|Xelaev18025788m.g|	327		0	0	rbm15b.S	rbm15b.S	743	0	0	2	0	1	0	0	0	1	0	0	0
mi|Xelaev18044378m.g|	328	C	0	10	eaf2.L	eaf2.L	251	0	2	3	0	1	0	0	1	2	0	1	0
mi|Xelaev18046938m.g|	328		0	0	eaf2.S	eaf2.S	250	0	2	3	0	1	0	0	1	2	0	1	0
mi|Xelaev18018649m.g|	329	C	0	12	tcf7l1.L	tcf7l1.L	554	0	1	3	0	3	0	0	2	2	0	1	0
mi|Xelaev18020249m.g|	329		0	0	tcf7l1.S	tcf7l1.S	551	0	1	3	0	3	0	0	2	2	0	1	0
mi|Xelaev18019997m.g|	329		0	0	tcf7.S	tcf7.S	487	0	0	1	0	1	0	0	1	1	0	0	0
mi|Xelaev18036630m.g|	329		0	0	tcf7l2.S	tcf7l2.S	482	0	0	1	0	1	0	0	1	1	0	0	0
mi|Xelaev18034231m.g|	329		0	0	tcf7l2.L	tcf7l2.L	482	0	0	1	0	1	0	0	1	1	0	0	0
mi|Xelaev18009328m.g|	329		0	0	lef1.S	lef1.S	372	0	0	1	0	1	0	0	1	1	0	0	0
mi|Xelaev18005626m.g|	329		0	0	lef1.L	lef1.L	372	0	0	1	0	1	0	0	1	1	0	0	0
mi|Xelaev18002272m.g|	330		0	0	kif22.S	kif22.S	651	0	2	5	0	3	1	0	2	2	0	2	0
mi|Xelaev18001350m.g|	330	C	1	17	kif22.L	kif22.L	650	0	2	5	0	4	1	0	2	2	0	2	0
mi|Xelaev18033273m.g|	331	C	43	0	mlh1.S	mlh1.S	750	0	0	0	0	0	0	0	16	12	0	9	6
mi|Xelaev18032717m.g|	332	C	36	0	loc100486247.S	loc100486247.S	1161	0	3	10	0	6	3	0	8	8	0	7	2
mi|Xelaev18030508m.g|	332	C	17	11	loc100486247.L	loc100486247.L	1171	0	4	9	0	3	1	0	4	3	0	2	2
mi|Xelaev18019185m.g|	333	C	3	0	taf6.L	taf6.L	555	0	1	2	0	0	0	0	0	0	0	0	0
mi|Xelaev18042391m.g|	334	C	22	0	loc100487930.S	loc100487930.S	734	0	2	1	0	1	0	0	6	9	0	1	2
mi|Xelaev18039608m.g|	335	C	8	0	prpf39.1.L	prpf39.1.L	622	0	3	7	1	2	0	0	4	3	2	4	0
mi|Xelaev18041253m.g|	335	C	12	18	prpf39.1.S	prpf39.1.S	667	0	4	6	1	2	0	0	5	5	2	5	0
mi|Xelaev18009547m.g|	336	C	15	0	prc1.2.S	prc1.2.S	581	0	2	7	0	5	3	0	4	7	0	5	2
mi|Xelaev18005880m.g|	336	C	8	20	prc1.2.L	prc1.2.L	674	0	4	6	0	4	2	0	4	5	0	3	0
mi|Xelaev18030684m.g|	337	C	0	9	dnajb6.L	dnajb6.L	339	0	1	1	0	1	1	0	2	2	0	1	0
mi|Xelaev18032835m.g|	337		0	0	dnajb6.S	dnajb6.S	333	0	1	1	0	1	1	0	2	2	0	1	0
mi|Xelaev18025572m.g|	338	C	2	5	ep300.S	ep300.S	2495	0	2	4	0	0	1	0	0	0	0	0	0
mi|Xelaev18023557m.g|	338		0	0	ep300.L	ep300.L	2492	0	2	3	0	0	0	0	0	0	0	0	0
mi|Xelaev18045447m.g|	338		0	0	crebbp.L	crebbp.L	2453	0	0	2	0	0	0	0	0	0	0	0	0
mi|Xelaev18047706m.g|	338		0	0	crebbp.S	crebbp.S	2424	0	0	2	0	0	0	0	0	0	0	0	0
mi|Xelaev18006062m.g|	339	C	2	0	hnrnpm.L	hnrnpm.L	742	0	0	0	0	0	0	0	2	0	0	0	0
mi|Xelaev18015791m.g|	340	C	2	0	med4.S	med4.S	252	0	1	1	0	0	0	0	0	0	0	0	0
mi|Xelaev18006955m.g|	341	C	14	0	fancc.L	fancc.L	551	0	1	2	0	2	1	0	2	2	0	2	2
mi|Xelaev18034668m.g|	342	C	0	1	npm3.L	npm3.L	240	0	0	0	0	0	0	0	0	0	0	1	0
mi|Xelaev18036956m.g|	342		0	0	npm3.S	npm3.S	171	0	0	0	0	0	0	0	0	0	0	1	0
mi|Xelaev18023102m.g|	343	C	12	0	dmap1.L	dmap1.L	464	0	1	3	0	3	1	0	1	2	0	1	0
mi|Xelaev18039231m.g|	344		0	0	ppp1r10.L	ppp1r10.L	843	0	1	0	0	0	0	0	0	0	0	1	0
mi|Xelaev18042482m.g|	344	C	6	2	ppp1r10.S	ppp1r10.S	819	0	2	1	0	1	0	0	1	1	0	2	0
mi|Xelaev18023343m.g|	345	C	11	0	cdc7.L	cdc7.L	509	0	2	3	0	2	2	0	1	0	0	0	1
mi|Xelaev18028526m.g|	346	C	8	0	slx4ip.S	slx4ip.S	397	0	2	1	0	1	0	0	3	1	0	0	0
mi|Xelaev18023889m.g|	347	C	1	0	rpl29.L	rpl29.L	75	0	1	0	0	0	0	0	0	0	0	0	0
mi|Xelaev18018631m.g|	348		0	0	ppia.L	ppia.L	243	0	0	1	0	0	0	0	0	0	0	1	1
mi|Xelaev18020270m.g|	348	C	15	3	ppia.S	ppia.S	164	0	2	3	1	2	2	0	2	1	0	3	2
mi|Xelaev18038407m.g|	349	C	3	0	setx.L	setx.L	2537	0	0	3	0	0	0	0	0	0	0	0	0
mi|Xelaev18016957m.g|	350	C	10	0	ddx46.L	ddx46.L	993	0	0	3	0	0	1	0	1	2	0	2	1
mi|Xelaev18024575m.g|	351	C	10	19	ctr9.S	ctr9.S	1157	0	3	5	0	5	1	0	3	5	0	5	2
mi|Xelaev18021770m.g|	351		0	0	ctr9.L	ctr9.L	1082	0	2	5	0	3	1	0	2	3	0	2	1
mi|Xelaev18043644m.g|	352	C	1	0	psmf1.L	psmf1.L	263	0	0	1	0	0	0	0	0	0	0	0	0
mi|Xelaev18044303m.g|	353	C	43	0	coil.L	coil.L	536	2	3	8	2	5	3	3	4	4	2	3	4
mi|Xelaev18045058m.g|	354	C	1	0	rnf216.L	rnf216.L	864	0	0	0	0	0	0	0	0	1	0	0	0
mi|Xelaev18041473m.g|	355	C	0	4	pou5f3.3.S	pou5f3.3.S	432	0	1	0	0	0	0	0	1	1	0	1	0
mi|Xelaev18038230m.g|	355		0	0	pou5f3.3.L	pou5f3.3.L	426	0	1	0	0	0	0	0	1	1	0	1	0
mi|Xelaev18001330m.g|	356	C	1	0	slx1a.L	slx1a.L	282	0	0	0	0	1	0	0	0	0	0	0	0
mi|Xelaev18036235m.g|	357	C	4	1	xrcc1.L	xrcc1.L	651	0	0	2	0	1	0	0	0	2	0	0	0
mi|Xelaev18003960m.g|	357		0	0	xrcc1.S	xrcc1.S	591	0	0	0	0	1	0	0	0	0	0	0	0
mi|Xelaev18035488m.g|	358	C	4	1	pdgfb-like.L	pdgfb-like.L	661	0	1	2	0	0	1	0	1	0	0	0	0
mi|Xelaev18037361m.g|	358	C	1	0	pdgfb-like.S	pdgfb-like.S	589	0	0	2	0	0	0	0	0	0	0	0	0
mi|Xelaev18005922m.g|	359	C	18	0	hnrnpd.L	hnrnpd.L	295	2	2	1	2	1	3	0	1	1	1	2	2
mi|Xelaev18010309m.g|	360	C	13	0	nop10.S	nop10.S	64	0	2	2	0	2	1	0	1	2	0	1	2
mi|Xelaev18043691m.g|	361	C	0	5	nploc4.L	nploc4.L	610	0	0	2	0	0	0	0	1	2	0	0	0
mi|Xelaev18046467m.g|	361		0	0	nploc4.S	nploc4.S	610	0	0	2	0	0	0	0	1	2	0	0	0
mi|Xelaev18032216m.g|	362	C	1	0	vps13b.L	vps13b.L	4031	0	0	0	0	0	0	0	1	0	0	0	0
mi|Xelaev18010036m.g|	363	C	0	4	plaa.S	plaa.S	799	0	0	1	0	0	0	0	1	2	0	0	0
mi|Xelaev18006765m.g|	363		0	0	plaa.L	plaa.L	799	0	0	1	0	0	0	0	1	2	0	0	0
mi|Xelaev18046033m.g|	364	C	3	11	kat7.S	kat7.S	618	0	1	2	0	2	3	0	2	1	0	2	1
mi|Xelaev18043268m.g|	364		0	0	kat7.L	kat7.L	535	0	1	2	0	1	2	0	2	1	0	1	1
mi|Xelaev18026704m.g|	365	C	0	16	Xelaev18026704m.g	Xelaev18026704m.g	779	0	1	0	2	2	2	2	2	1	0	1	3
mi|Xelaev18028958m.g|	365		0	0	Xelaev18028958m.g	Xelaev18028958m.g	774	0	1	0	2	2	2	2	2	1	0	1	3
mi|Xelaev18039261m.g|	366	C	9	0	fancf.L	fancf.L	348	0	0	1	0	1	1	0	1	3	0	2	0
mi|Xelaev18000083m.g|	367	C	1	0	Xelaev18000083m.g	Xelaev18000083m.g	330	0	0	1	0	0	0	0	0	0	0	0	0
mi|Xelaev18013349m.g|	368	C	0	14	wdr61.L	wdr61.L	305	0	3	2	0	1	1	0	2	2	0	2	1
mi|Xelaev18015851m.g|	368		0	0	wdr61.S	wdr61.S	305	0	3	2	0	1	1	0	2	2	0	2	1
mi|Xelaev18022820m.g|	369	C	4	11	sf3b3.L	sf3b3.L	1217	0	2	6	0	1	1	0	3	1	0	0	1
mi|Xelaev18025004m.g|	369		0	0	sf3b3.S	sf3b3.S	1217	0	1	4	0	1	1	0	2	1	0	0	1
mi|Xelaev18008996m.g|	370	C	3	13	rpl9.S	rpl9.S	289	0	3	2	0	1	2	1	2	1	0	2	2
mi|Xelaev18005217m.g|	370		0	0	rpl9.L	rpl9.L	205	0	2	2	0	1	2	1	2	1	0	1	1
mi|Xelaev18045897m.g|	371	C	13	33	smarce1.S	smarce1.S	424	0	4	8	0	5	6	0	6	6	0	7	4
mi|Xelaev18043132m.g|	371	C	6	0	smarce1.L	smarce1.L	405	0	3	7	0	5	4	0	5	5	0	6	4
mi|Xelaev18044940m.g|	372	C	0	11	sumo1.L	sumo1.L	148	0	2	2	0	2	1	0	2	1	0	1	0
mi|Xelaev18047361m.g|	372		0	0	sumo1.S	sumo1.S	141	0	2	2	0	2	1	0	2	1	0	1	0
mi|Xelaev18018645m.g|	373	C	13	0	pold2.L	pold2.L	463	0	0	0	0	1	1	0	4	4	0	1	2
mi|Xelaev18027348m.g|	374	C	10	0	loc100497894-like.L	loc100497894-like.L	588	0	1	3	0	2	0	0	2	0	0	1	1
mi|Xelaev18045050m.g|	375	C	3	0	hspe1.L	hspe1.L	102	1	0	0	0	1	0	0	0	0	0	0	1
mi|Xelaev18045252m.g|	376	C	14	0	nsmce1.L	nsmce1.L	270	0	0	1	0	2	1	0	2	4	0	3	1
mi|Xelaev18027249m.g|	377	C	8	0	ccnc.L	ccnc.L	283	0	1	1	0	1	1	0	2	1	0	1	0
mi|Xelaev18042465m.g|	378	C	0	1	csnk2b.S	csnk2b.S	215	0	0	1	0	0	0	0	0	0	0	0	0
mi|Xelaev18039202m.g|	378		0	0	csnk2b.L	csnk2b.L	215	0	0	1	0	0	0	0	0	0	0	0	0
mi|Xelaev18007741m.g|	379	C	0	24	ran.L	ran.L	216	3	3	2	0	1	2	1	2	3	2	2	3
mi|Xelaev18010576m.g|	379		0	0	ran.S	ran.S	216	3	3	2	0	1	2	1	2	3	2	2	3
mi|Xelaev18020764m.g|	380	C	0	3	sin3a.S	sin3a.S	1278	0	1	2	0	0	0	0	0	0	0	0	0
mi|Xelaev18018053m.g|	380		0	0	sin3a.L	sin3a.L	1273	0	1	2	0	0	0	0	0	0	0	0	0
mi|Xelaev18007694m.g|	381	C	0	1	ufd1l.L	ufd1l.L	307	0	0	1	0	0	0	0	0	0	0	0	0
mi|Xelaev18010539m.g|	381		0	0	ufd1l.S	ufd1l.S	307	0	0	1	0	0	0	0	0	0	0	0	0
sp|Q5D862|FILA2_HUMAN_contaminant	382	C	2	0	Filaggrin-2 OS=Homo sapiens GN=FLG2 PE=1 SV=1	Filaggrin-2 OS=Homo sapiens GN=FLG2 PE=1 SV=1	2391	0	0	0	0	0	0	0	0	1	0	1	0
mi|Xelaev18041563m.g|	383		0	0	wdr5.S	wdr5.S	334	0	3	3	0	3	1	0	3	3	0	2	0
mi|Xelaev18038336m.g|	383	C	4	18	wdr5.L	wdr5.L	334	0	4	4	0	3	1	0	4	4	0	2	0
mi|Xelaev18019079m.g|	384	C	9	0	rnaseh2a.L	rnaseh2a.L	278	0	0	1	0	1	1	0	1	3	0	2	0
mi|Xelaev18041304m.g|	385	C	7	0	taf6l-like.S	taf6l-like.S	574	0	1	1	0	1	1	0	1	1	0	1	0
mi|Xelaev18039657m.g|	386	C	24	0	wdhd1.L	wdhd1.L	1127	0	0	6	0	2	0	0	4	6	0	4	2
mi|Xelaev18022337m.g|	387		0	0	sf3b2.L	sf3b2.L	755	0	0	1	0	0	0	0	0	0	0	0	0
mi|Xelaev18024168m.g|	387		0	0	sf3b2.S	sf3b2.S	746	0	0	1	0	0	0	0	0	0	0	0	0
mi|Xelaev18041715m.g|	387	C	10	0	cdk9.S	cdk9.S	353	0	1	3	0	2	2	0	2	3	0	2	1
mi|Xelaev18004133m.g|	387	C	5	7	cdk9.L	cdk9.L	376	0	1	3	0	2	2	0	1	1	0	2	0
mi|Xelaev18007868m.g|	388	C	1	9	rpl6.L	rpl6.L	258	0	1	1	0	2	1	1	1	1	1	0	1
mi|Xelaev18010675m.g|	388		0	0	rpl6.S	rpl6.S	283	0	1	1	0	1	1	1	1	1	1	0	1
mi|Xelaev18024277m.g|	389	C	0	4	fau.S	fau.S	133	0	1	1	0	1	0	0	1	0	0	0	0
mi|Xelaev18022115m.g|	389		0	0	fau.L	fau.L	133	0	1	1	0	1	0	0	1	0	0	0	0
mi|Xelaev18043309m.g|	390	C	17	0	dbf4b.L	dbf4b.L	784	0	2	3	0	2	3	0	2	2	0	3	0
mi|Xelaev18031560m.g|	391	C	6	0	wrnip1.L	wrnip1.L	572	0	1	3	0	0	0	0	1	0	0	1	0
mi|Xelaev18015116m.g|	392	C	0	1	snrnp40.S	snrnp40.S	337	0	1	0	0	0	0	0	0	0	0	0	0
mi|Xelaev18012059m.g|	392		0	0	snrnp40.L	snrnp40.L	337	0	1	0	0	0	0	0	0	0	0	0	0
mi|Xelaev18012630m.g|	393	C	1	2	Xelaev18012630m.g	Xelaev18012630m.g	461	2	3	3	2	3	2	2	2	4	1	3	2
mi|Xelaev18046315m.g|	393	C	0	28	eef1a2.S	eef1a2.S	463	2	3	3	2	2	2	2	3	3	1	3	2
mi|Xelaev18043588m.g|	393		0	0	eef1a2.L	eef1a2.L	463	2	3	3	2	2	2	2	3	3	1	3	2
mi|Xelaev18002122m.g|	393	C	0	13	Xelaev18002122m.g	Xelaev18002122m.g	462	2	4	4	3	3	3	3	3	4	2	5	4
mi|Xelaev18029462m.g|	393		0	0	Xelaev18029462m.g	Xelaev18029462m.g	462	2	4	4	3	3	3	3	3	4	2	5	4
mi|Xelaev18004064m.g|	393		0	0	Xelaev18004064m.g	Xelaev18004064m.g	461	2	3	3	2	3	2	2	3	4	1	2	2
mi|Xelaev18003479m.g|	393	C	1	0	Xetrov90028866m.1	Xetrov90028866m.1	308	3	3	3	2	2	2	2	2	3	1	2	2
mi|Xelaev18032367m.g|	393		0	0	42Sp50.L	42Sp50.L	463	1	1	1	1	1	1	1	1	1	0	1	1
mi|Xelaev18029519m.g|	393		0	0	Xelaev18029519m.g	Xelaev18029519m.g	410	1	2	2	1	1	1	1	1	2	0	1	1
sp|P29508|SPB3_HUMAN_contaminant	394	C	5	3	Serpin B3 OS=Homo sapiens GN=SERPINB3 PE=1 SV=2	Serpin B3 OS=Homo sapiens GN=SERPINB3 PE=1 SV=2	390	0	0	0	0	0	0	0	0	5	0	3	0
sp|P48594|SPB4_HUMAN_contaminant	394		0	0	Serpin B4 OS=Homo sapiens GN=SERPINB4 PE=1 SV=2	Serpin B4 OS=Homo sapiens GN=SERPINB4 PE=1 SV=2	390	0	0	0	0	0	0	0	0	1	0	2	0
mi|Xelaev18036725m.g|	395	C	1	27	Xelaev18036725m.g	Xelaev18036725m.g	333	0	2	4	1	3	3	0	4	5	0	3	3
mi|Xelaev18034420m.g|	395	C	5	0	Xelaev18034420m.g	Xelaev18034420m.g	333	0	2	5	1	4	4	0	5	4	0	4	3
mi|Xelaev18000200m.g|	395	C	18	0	Xelaev18000200m.g	Xelaev18000200m.g	294	0	3	4	2	4	5	2	6	6	1	5	3
mi|Xelaev18044554m.g|	396	C	30	0	orc4.L	orc4.L	432	0	7	8	0	3	4	0	3	2	0	3	0
mi|Xelaev18001485m.g|	397	C	2	5	nme2.L	nme2.L	154	2	0	0	2	0	0	0	0	0	0	1	2
mi|Xelaev18002359m.g|	397		0	0	nme2	nme2	237	1	0	0	2	0	0	0	0	0	0	1	1
mi|Xelaev18007424m.g|	398	C	15	0	ewsr1.L	ewsr1.L	671	0	1	2	0	1	2	0	3	2	0	3	1
mi|Xelaev18040950m.g|	399		0	0	pklr.L	pklr.L	622	0	1	0	0	0	0	0	1	0	0	1	1
mi|Xelaev18043021m.g|	399		0	0	pklr.S	pklr.S	531	0	1	0	0	0	0	0	1	0	0	1	1
mi|Xelaev18020793m.g|	399	C	8	7	pkm.S	pkm.S	527	1	2	0	2	1	0	1	2	0	2	2	2
mi|Xelaev18018020m.g|	399		0	0	pkm.L	pkm.L	527	0	1	0	1	0	0	0	1	0	1	2	1
mi|Xelaev18035875m.g|	400	C	6	0	lig1.L	lig1.L	1062	0	0	0	0	0	0	0	3	2	0	0	1
mi|Xelaev18039054m.g|	401	C	2	0	snrpd2.L	snrpd2.L	192	0	1	0	0	1	0	0	0	0	0	0	0
mi|Xelaev18014510m.g|	402	C	5	0	pola1.S	pola1.S	718	0	0	2	0	0	0	0	1	2	0	0	0
mi|Xelaev18024665m.g|	403	C	1	8	Xelaev18024665m.g	Xelaev18024665m.g	332	1	0	0	1	0	1	1	1	0	1	1	2
mi|Xelaev18021657m.g|	403		0	0	Xelaev18021657m.g	Xelaev18021657m.g	271	1	0	0	1	0	1	1	1	0	1	1	1
mi|Xelaev18021331m.g|	404	C	0	6	ctbp2-like.1.S	ctbp2-like.1.S	480	0	0	1	0	1	1	0	1	1	0	0	1
mi|Xelaev18005017m.g|	404		0	0	ctbp1.L	ctbp1.L	441	0	0	1	0	1	1	0	1	1	0	0	1
mi|Xelaev18017349m.g|	404		0	0	ctbp2-like.1.L	ctbp2-like.1.L	437	0	0	1	0	1	1	0	1	1	0	0	1
mi|Xelaev18008854m.g|	404		0	0	ctbp1.S	ctbp1.S	430	0	0	1	0	1	1	0	1	1	0	0	1
mi|Xelaev18045140m.g|	405	C	8	0	rmi2.L	rmi2.L	152	0	0	0	0	1	1	0	2	1	0	2	1
mi|Xelaev18040866m.g|	406	C	5	3	ints3.L	ints3.L	1018	0	0	3	0	1	0	0	1	1	0	1	1
mi|Xelaev18042964m.g|	406		0	0	ints3.S	ints3.S	965	0	0	2	0	0	0	0	0	1	0	0	0
mi|Xelaev18042337m.g|	407	C	0	22	rbmx.S	rbmx.S	370	0	2	3	1	2	3	0	3	3	0	3	2
mi|Xelaev18039029m.g|	407		0	0	rbmx.L	rbmx.L	365	0	2	3	1	2	3	0	3	3	0	3	2
mi|Xelaev18007032m.g|	408	C	4	8	pabpn1.L	pabpn1.L	290	0	2	2	1	1	1	0	1	0	0	2	2
mi|Xelaev18010226m.g|	408		0	0	pabpn1.S	pabpn1.S	296	0	1	1	1	1	1	0	1	0	0	1	1
mi|Xelaev18020364m.g|	409	C	3	0	snrnp27.S	snrnp27.S	158	0	0	2	0	0	0	0	0	1	0	0	0
mi|Xelaev18046067m.g|	410	C	0	7	eftud2.S	eftud2.S	974	0	1	0	0	0	1	0	1	1	0	2	1
mi|Xelaev18043313m.g|	410		0	0	eftud2.L	eftud2.L	974	0	1	0	0	0	1	0	1	1	0	2	1
mi|Xelaev18008475m.g|	410		0	0	eef2.2.L	eef2.2.L	859	0	1	0	1	0	1	0	1	1	0	1	1
mi|Xelaev18006082m.g|	410	C	0	4	eef2.1.L	eef2.1.L	858	0	2	0	1	0	1	0	1	1	0	2	2
mi|Xelaev18011119m.g|	410		0	0	eef2.2.S	eef2.2.S	847	0	1	0	1	0	1	0	1	1	0	1	1
mi|Xelaev18009640m.g|	410		0	0	eef2.1.S	eef2.1.S	846	0	2	0	1	0	1	0	1	1	0	2	2
mi|Xelaev18046013m.g|	411	C	4	0	znf281.S	znf281.S	792	0	2	5	0	2	2	0	2	2	0	3	1
mi|Xelaev18043252m.g|	411	C	1	15	znf281.L	znf281.L	793	0	3	2	0	2	2	0	2	2	0	2	1
mi|Xelaev18002268m.g|	412	C	0	1	aldoa.S	aldoa.S	424	0	0	0	0	0	0	0	1	0	0	0	0
mi|Xelaev18001342m.g|	412		0	0	aldoa.L	aldoa.L	364	0	0	0	0	0	0	0	1	0	0	0	0
mi|Xelaev18014108m.g|	413	C	3	0	pold3.L	pold3.L	779	0	0	0	0	0	0	0	1	2	0	0	0
mi|Xelaev18021913m.g|	414	C	5	0	nat10.L	nat10.L	1146	0	2	2	0	0	1	0	0	0	0	0	0
mi|Xelaev18015092m.g|	415	C	8	0	gmeb1.S	gmeb1.S	502	0	2	2	0	1	1	0	1	1	0	0	0
mi|Xelaev18024644m.g|	416	C	0	5	rps13.S	rps13.S	151	0	0	0	0	0	0	1	0	0	0	2	2
mi|Xelaev18021697m.g|	416		0	0	rps13.L	rps13.L	151	0	0	0	0	0	0	1	0	0	0	2	2
mi|Xelaev18002356m.g|	417	C	16	0	hirip3.S	hirip3.S	683	0	4	4	0	3	3	0	3	1	0	3	2
mi|Xelaev18001481m.g|	417	C	2	7	hirip3.L	hirip3.L	703	0	2	2	0	1	1	0	2	0	0	1	0
##mi|Xelaev18001215m.g|	417		0	0	####trim14.S	####trim14.S	572	0	0	1	0	0	0	0	1	0	0	1	0
mi|Xelaev18031249m.g|	418	C	1	0	rp9.L	rp9.L	226	0	0	0	0	0	0	0	0	0	0	1	0
mi|Xelaev18013762m.g|	419	C	0	9	Xelaev18013762m.g	Xelaev18013762m.g	160	0	1	2	0	1	0	0	1	1	0	2	1
mi|Xelaev18016211m.g|	419		0	0	Xelaev18016211m.g	Xelaev18016211m.g	160	0	1	2	0	1	0	0	1	1	0	2	1
mi|Xelaev18037282m.g|	419		0	0	Xelaev18037282m.g	Xelaev18037282m.g	160	0	1	2	0	1	0	0	1	1	0	1	1
mi|Xelaev18029553m.g|	420	C	0	1	abcf3.S	abcf3.S	711	0	1	0	0	0	0	0	0	0	0	0	0
mi|Xelaev18027446m.g|	420		0	0	abcf3.L	abcf3.L	711	0	1	0	0	0	0	0	0	0	0	0	0
mi|Xelaev18020359m.g|	421	C	0	6	snrpg.S	snrpg.S	76	0	1	1	0	1	1	0	0	1	0	1	0
mi|Xelaev18018535m.g|	421		0	0	snrpg.L	snrpg.L	72	0	1	1	0	1	1	0	0	1	0	1	0
mi|Xelaev18010450m.g|	422	C	0	7	rplp0.S	rplp0.S	315	0	0	2	0	0	1	0	0	1	0	2	1
mi|Xelaev18007547m.g|	422		0	0	rplp0.L	rplp0.L	314	0	0	2	0	0	1	0	0	1	0	2	1
mi|Xelaev18010865m.g|	423	C	6	0	Xetrov90003391m.S	Xetrov90003391m.S	2230	0	0	0	0	1	1	0	2	1	0	1	0
mi|Xelaev18024935m.g|	424	C	23	0	top1.2.S	top1.2.S	770	0	2	6	0	4	3	0	3	3	0	2	0
mi|Xelaev18009638m.g|	425	C	12	0	pias4.S	pias4.S	543	0	6	8	0	5	5	0	5	6	0	6	3
mi|Xelaev18006080m.g|	425	C	7	32	pias4.L	pias4.L	544	0	6	6	0	6	4	0	5	5	0	5	2
mi|Xelaev18047771m.g|	426	C	0	13	Xelaev18047771m.g	Xelaev18047771m.g	281	0	2	2	1	1	1	0	2	1	0	2	1
mi|Xelaev18045525m.g|	426		0	0	Xelaev18045525m.g	Xelaev18045525m.g	281	0	2	2	1	1	1	0	2	1	0	2	1
mi|Xelaev18022282m.g|	427	C	1	0	kat5.L	kat5.L	508	0	0	0	0	1	0	0	0	0	0	0	0
mi|Xelaev18026279m.g|	428	C	7	0	dnah14.L	dnah14.L	4635	0	0	0	1	0	1	1	2	0	0	2	0
sp|P31151|S10A7_HUMAN_contaminant	429	C	9	0	Protein S100-A7 OS=Homo sapiens GN=S100A7 PE=1 SV=4	Protein S100-A7 OS=Homo sapiens GN=S100A7 PE=1 SV=4	101	0	0	0	0	0	0	0	1	5	0	3	0
mi|Xelaev18006621m.g|	430	C	1	0	Xelaev18006621m.g	Xelaev18006621m.g	88	0	0	0	0	0	0	0	0	0	0	1	0
mi|Xelaev18007454m.g|	431	C	5	0	sart3.L	sart3.L	933	0	1	2	0	1	1	0	0	0	0	0	0
sp|Q08554|DSC1_HUMAN_contaminant	432	C	8	0	Desmocollin-1 OS=Homo sapiens GN=DSC1 PE=1 SV=2	Desmocollin-1 OS=Homo sapiens GN=DSC1 PE=1 SV=2	894	0	0	0	4	0	1	0	0	2	0	1	0
sp|Q86YZ3|HORN_HUMAN_contaminant	433	C	2	0	Hornerin OS=Homo sapiens GN=HRNR PE=1 SV=2	Hornerin OS=Homo sapiens GN=HRNR PE=1 SV=2	2850	0	1	0	0	0	1	0	0	0	0	0	0
mi|Xelaev18047520m.g|	434	C	0	22	rps15a.S	rps15a.S	175	0	2	3	0	3	3	0	2	4	0	3	2
mi|Xelaev18045199m.g|	434		0	0	rps15a.L	rps15a.L	164	0	2	3	0	3	3	0	2	4	0	3	2
mi|Xelaev18010129m.g|	435	C	0	1	gcnt1.S	gcnt1.S	428	0	0	0	0	0	0	0	0	1	0	0	0
mi|Xelaev18006910m.g|	435		0	0	gcnt1.L	gcnt1.L	428	0	0	0	0	0	0	0	0	1	0	0	0
mi|Xelaev18022034m.g|	436	C	7	15	fen1.L	fen1.L	382	0	2	3	0	0	3	0	5	3	0	3	3
mi|Xelaev18024332m.g|	436		0	0	fen1.S	fen1.S	382	0	1	2	0	0	3	0	4	2	0	1	2
mi|Xelaev18035702m.g|	437	C	1	0	zmynd12.L	zmynd12.L	362	0	0	0	0	0	1	0	0	0	0	0	0
mi|Xelaev18020435m.g|	438	C	4	0	vwa9.S	vwa9.S	518	0	0	2	0	0	0	0	0	1	0	1	0
mi|Xelaev18023939m.g|	439	C	0	4	loc100493057.L	loc100493057.L	167	0	0	1	0	1	0	0	1	1	0	0	0
mi|Xelaev18025862m.g|	439		0	0	loc100493057.S	loc100493057.S	135	0	0	1	0	1	0	0	1	1	0	0	0
mi|Xelaev18045940m.g|	440	C	0	4	rpl19.S	rpl19.S	208	0	1	0	0	2	0	0	0	0	0	1	0
mi|Xelaev18043181m.g|	440		0	0	rpl19.L	rpl19.L	197	0	1	0	0	2	0	0	0	0	0	1	0
mi|Xelaev18027885m.g|	441	C	0	1	cab39.L	cab39.L	341	0	0	0	0	0	0	0	0	1	0	0	0
mi|Xelaev18029929m.g|	441		0	0	cab39.S	cab39.S	341	0	0	0	0	0	0	0	0	1	0	0	0
mi|Xelaev18009158m.g|	442	C	1	0	hmgb2.S	hmgb2.S	211	0	1	2	0	1	1	0	1	1	0	1	1
mi|Xelaev18005411m.g|	442	C	11	8	hmgb2.L	hmgb2.L	265	0	3	3	0	3	2	0	2	2	0	2	2
mi|Xelaev18012108m.g|	443	C	0	3	Xelaev18012108m.g	Xelaev18012108m.g	1936	0	0	0	0	2	0	0	0	1	0	0	0
mi|Xelaev18015066m.g|	443		0	0	Xelaev18015066m.g	Xelaev18015066m.g	1935	0	0	0	0	2	0	0	0	1	0	0	0
mi|Xelaev18020941m.g|	444	C	4	0	dclre1c.S	dclre1c.S	698	0	0	3	0	0	0	0	0	0	0	0	1
sp|P02662|CASA1_BOVIN_contaminant	445	C	8	0	Alpha-S1-casein OS=Bos taurus GN=CSN1S1 PE=1 SV=2	Alpha-S1-casein OS=Bos taurus GN=CSN1S1 PE=1 SV=2	214	0	1	0	2	1	0	2	0	0	0	1	1
mi|Xelaev18034260m.g|	446	C	0	1	Xelaev18034260m.g	Xelaev18034260m.g	371	0	0	0	0	0	1	0	0	0	0	0	0
mi|Xelaev18036652m.g|	446		0	0	gfra1.S	gfra1.S	255	0	0	0	0	0	1	0	0	0	0	0	0
mi|Xelaev18017116m.g|	447	C	0	4	hnrnph1.L	hnrnph1.L	441	1	0	0	1	0	0	1	0	0	1	0	0
mi|Xelaev18021523m.g|	447		0	0	hnrnph1.S	hnrnph1.S	441	1	0	0	1	0	0	1	0	0	1	0	0
mi|Xelaev18045164m.g|	448	C	5	0	ercc4.L	ercc4.L	924	0	0	2	0	1	0	0	0	0	0	2	0
mi|Xelaev18028699m.g|	449	C	9	0	ints7.S	ints7.S	978	0	1	4	0	1	0	0	1	0	0	2	0
mi|Xelaev18020741m.g|	450	C	0	4	rps17.S	rps17.S	170	0	0	0	0	1	1	0	1	0	0	1	0
mi|Xelaev18018088m.g|	450		0	0	rps17.L	rps17.L	138	0	0	0	0	1	1	0	1	0	0	1	0
mi|Xelaev18040088m.g|	451	C	3	0	rtf1.L	rtf1.L	677	0	1	1	0	0	0	0	0	1	0	0	0
mi|Xelaev18031212m.g|	452	C	3	0	hus1.L	hus1.L	282	0	0	0	0	1	0	0	0	0	0	2	0
mi|Xelaev18023987m.g|	453	C	0	1	mcm2.L	mcm2.L	886	0	0	1	0	0	0	0	0	0	0	0	0
mi|Xelaev18025893m.g|	453		0	0	mcm2.S	mcm2.S	885	0	0	1	0	0	0	0	0	0	0	0	0
mi|Xelaev18034606m.g|	454	C	0	1	znf518a.L	znf518a.L	1384	0	0	1	0	0	0	0	0	0	0	0	0
mi|Xelaev18036895m.g|	454		0	0	znf518a.S	znf518a.S	1371	0	0	1	0	0	0	0	0	0	0	0	0
mi|Xelaev18043893m.g|	455	C	0	1	snrpb.L	snrpb.L	406	0	0	1	0	0	0	0	0	0	0	0	0
mi|Xelaev18046555m.g|	455		0	0	snrpb.S	snrpb.S	236	0	0	1	0	0	0	0	0	0	0	0	0
mi|Xelaev18015982m.g|	456	C	5	2	atf1.S	atf1.S	279	0	0	3	0	1	1	0	1	0	0	1	0
mi|Xelaev18044970m.g|	456		0	0	Xelaev18044970m.g	Xelaev18044970m.g	327	0	0	2	0	0	0	0	0	0	0	0	0
mi|Xelaev18047380m.g|	456		0	0	Xelaev18047380m.g	Xelaev18047380m.g	324	0	0	2	0	0	0	0	0	0	0	0	0
mi|Xelaev18013507m.g|	456		0	0	atf1.L	atf1.L	280	0	0	2	0	0	0	0	0	0	0	0	0
mi|Xelaev18032858m.g|	456		0	0	crem.S	crem.S	102	0	0	2	0	0	0	0	0	0	0	0	0
mi|Xelaev18030720m.g|	456		0	0	crem.L	crem.L	102	0	0	2	0	0	0	0	0	0	0	0	0
mi|Xelaev18046025m.g|	457	C	3	0	phb.S	phb.S	272	0	0	0	1	0	0	0	0	0	0	1	1
mi|Xelaev18021534m.g|	458	C	7	8	hnrnpab.S	hnrnpab.S	326	0	2	2	0	2	1	0	2	2	0	2	2
mi|Xelaev18004597m.g|	458	C	6	0	hnrnpab.L	hnrnpab.L	324	0	1	2	0	2	1	0	2	2	0	2	2
mi|Xelaev18041489m.g|	459	C	0	3	ehmt1.S	ehmt1.S	1284	0	0	3	0	0	0	0	0	0	0	0	0
mi|Xelaev18038268m.g|	459		0	0	ehmt1.L	ehmt1.L	1278	0	0	3	0	0	0	0	0	0	0	0	0
mi|Xelaev18013400m.g|	460	C	0	4	atp5b.L	atp5b.L	525	0	0	0	0	0	1	2	0	0	0	0	1
mi|Xelaev18015901m.g|	460		0	0	atp5b.S	atp5b.S	525	0	0	0	0	0	1	2	0	0	0	0	1
mi|Xelaev18038198m.g|	461	C	0	9	rpl12.L	rpl12.L	170	0	1	1	1	1	1	0	1	1	0	1	1
mi|Xelaev18041444m.g|	461		0	0	rpl12.S	rpl12.S	165	0	1	1	1	1	1	0	1	1	0	1	1
mi|Xelaev18015864m.g|	462	C	3	0	zc3h10.S	zc3h10.S	409	0	0	1	0	0	0	0	1	0	0	1	0
mi|Xelaev18008122m.g|	463	C	2	0	rad17.L	rad17.L	674	0	0	0	0	0	0	0	0	1	0	1	0
mi|Xelaev18023929m.g|	464	C	7	0	rad18.L	rad18.L	447	0	0	0	0	0	0	0	3	2	0	1	1
mi|Xelaev18026389m.g|	465	C	5	0	polr1c.L	polr1c.L	347	0	1	2	0	0	0	0	0	1	0	1	0
mi|Xelaev18014748m.g|	466	C	2	0	atp6ap2.S	atp6ap2.S	348	0	0	0	0	1	0	0	1	0	0	0	0
##mi|Xelaev18009122m.g|	467	C	1	0	####slc25a4.S	####slc25a4.S	344	0	0	0	0	0	1	0	0	0	0	0	0
mi|Xelaev18016050m.g|	468	C	0	1	Xelaev18016050m.g	Xelaev18016050m.g	459	1	0	0	0	0	0	0	0	0	0	0	0
mi|Xelaev18013586m.g|	468		0	0	Xelaev18013586m.g	Xelaev18013586m.g	430	1	0	0	0	0	0	0	0	0	0	0	0
mi|Xelaev18047251m.g|	468		0	0	loc100490531-like.S	loc100490531-like.S	351	1	0	0	0	0	0	0	0	0	0	0	0
mi|Xelaev18044799m.g|	468		0	0	loc100490531-like.L	loc100490531-like.L	342	1	0	0	0	0	0	0	0	0	0	0	0
sp|P22629|SAV_STRAV_contaminant	469	C	102	0	Streptavidin OS=Streptomyces avidinii PE=1 SV=1	Streptavidin OS=Streptomyces avidinii PE=1 SV=1	183	5	6	12	7	9	10	5	12	11	7	10	8
mi|Xelaev18039125m.g|	470	C	0	7	Xelaev18039125m.g	Xelaev18039125m.g	152	0	1	1	0	0	1	0	1	1	0	2	0
mi|Xelaev18042417m.g|	470		0	0	Xelaev18042417m.g	Xelaev18042417m.g	152	0	1	1	0	0	1	0	1	1	0	2	0
mi|Xelaev18003481m.g|	470		0	0	Xelaev18003481m.g	Xelaev18003481m.g	141	0	1	1	0	0	1	0	1	1	0	2	0
mi|Xelaev18038721m.g|	471	C	0	2	las1l.L	las1l.L	589	0	0	1	0	0	0	0	0	0	0	1	0
mi|Xelaev18042081m.g|	471		0	0	las1l.S	las1l.S	588	0	0	1	0	0	0	0	0	0	0	1	0
mi|Xelaev18023542m.g|	472	C	1	1	mcm5.L	mcm5.L	735	0	0	2	0	0	0	0	0	0	0	0	0
mi|Xelaev18025556m.g|	472		0	0	mcm5.S	mcm5.S	735	0	0	1	0	0	0	0	0	0	0	0	0
mi|Xelaev18012600m.g|	473	C	0	26	srrm1.L	srrm1.L	871	1	3	3	2	3	3	0	3	2	0	3	3
##mi|Xelaev18012600m.g|	473		0	0	####srrm1.L	####srrm1.L	871	1	3	3	2	3	3	0	3	2	0	2	3
mi|Xelaev18015266m.g|	473		0	0	srrm1.S	srrm1.S	811	0	0	0	0	0	0	0	0	0	0	1	0
mi|Xelaev18012655m.g|	474	C	23	0	brip1.L	brip1.L	1231	0	1	2	0	3	2	0	3	4	0	5	3
mi|Xelaev18018009m.g|	475	C	0	2	Xelaev18018009m.g	Xelaev18018009m.g	326	0	0	0	1	0	1	0	0	0	0	0	0
mi|Xelaev18040824m.g|	475		0	0	Xelaev18040824m.g	Xelaev18040824m.g	305	0	0	0	1	0	1	0	0	0	0	0	0
mi|Xelaev18004237m.g|	475		0	0	tpm2.S	tpm2.S	303	0	0	0	1	0	1	0	0	0	0	0	0
mi|Xelaev18008636m.g|	475		0	0	tpm2.L	tpm2.L	284	0	0	0	1	0	1	0	0	0	0	0	0
mi|Xelaev18020802m.g|	475		0	0	Xelaev18020802m.g	Xelaev18020802m.g	284	0	0	0	1	0	1	0	0	0	0	0	0
mi|Xelaev18009894m.g|	475		0	0	tpm4.S	tpm4.S	284	0	0	0	1	0	1	0	0	0	0	0	0
mi|Xelaev18006390m.g|	475		0	0	tpm4.L	tpm4.L	272	0	0	0	1	0	1	0	0	0	0	0	0
mi|Xelaev18042934m.g|	475		0	0	tpm3.S	tpm3.S	250	0	0	0	1	0	1	0	0	0	0	0	0
mi|Xelaev18028597m.g|	476	C	0	1	wdr43.S	wdr43.S	724	0	0	1	0	0	0	0	0	0	0	0	0
mi|Xelaev18026332m.g|	476		0	0	wdr43.L	wdr43.L	658	0	0	1	0	0	0	0	0	0	0	0	0
mi|Xelaev18019717m.g|	477	C	5	0	asun.S	asun.S	707	0	0	1	0	1	1	0	1	1	0	0	0
mi|Xelaev18018310m.g|	478	C	3	0	rpl37a.L	rpl37a.L	92	0	0	1	0	0	0	0	0	1	0	1	0
mi|Xelaev18010278m.g|	479	C	0	7	tox4.S	tox4.S	649	0	1	1	0	1	1	0	1	1	0	1	0
mi|Xelaev18007306m.g|	479		0	0	tox4.L	tox4.L	594	0	1	1	0	1	1	0	1	1	0	1	0
mi|Xelaev18043977m.g|	479		0	0	tox2.L	tox2.L	484	0	1	1	0	1	1	0	1	1	0	1	0
mi|Xelaev18046635m.g|	479		0	0	tox2.S	tox2.S	484	0	1	1	0	1	1	0	1	1	0	1	0
mi|Xelaev18020744m.g|	480	C	0	1	ppib.S	ppib.S	216	0	0	1	0	0	0	0	0	0	0	0	0
mi|Xelaev18018084m.g|	480		0	0	ppib.L	ppib.L	216	0	0	1	0	0	0	0	0	0	0	0	0
mi|Xelaev18007964m.g|	480		0	0	ppic.L	ppic.L	208	0	0	1	0	0	0	0	0	0	0	0	0
mi|Xelaev18010744m.g|	480		0	0	ppic.S	ppic.S	178	0	0	1	0	0	0	0	0	0	0	0	0
##mi|Xelaev18004122m.g|	481	C	1	0	####loc100490770-like.L	####loc100490770-like.L	703	0	0	0	0	0	0	0	0	0	0	0	1
mi|Xelaev18031594m.g|	482	C	0	2	cdyl.L	cdyl.L	541	0	0	1	0	1	0	0	0	0	0	0	0
mi|Xelaev18033420m.g|	482		0	0	cdyl.S	cdyl.S	540	0	0	1	0	1	0	0	0	0	0	0	0
mi|Xelaev18010527m.g|	483	C	0	6	ube2l3.S	ube2l3.S	154	0	1	0	0	1	0	0	1	1	0	1	1
mi|Xelaev18007682m.g|	483		0	0	ube2l3.L	ube2l3.L	154	0	1	0	0	1	0	0	1	1	0	1	1
mi|Xelaev18015216m.g|	484	C	1	0	khdrbs1.S	khdrbs1.S	360	0	0	1	0	0	0	0	0	0	0	0	0
mi|Xelaev18005767m.g|	485	C	2	4	smarcad1.L	smarcad1.L	1012	0	0	1	0	0	0	0	2	1	0	2	0
mi|Xelaev18009456m.g|	485	C	2	0	smarcad1.S	smarcad1.S	1001	0	0	1	0	0	0	0	2	2	0	1	0
mi|Xelaev18010507m.g|	486	C	0	3	vegt.S	vegt.S	455	0	0	1	0	0	0	0	1	0	0	1	0
mi|Xelaev18007613m.g|	486		0	0	vegt.L	vegt.L	455	0	0	1	0	0	0	0	1	0	0	1	0
mi|Xelaev18014087m.g|	487	C	0	1	loc101733409.L	loc101733409.L	2260	0	0	0	0	0	0	0	1	0	0	0	0
mi|Xelaev18016387m.g|	487		0	0	loc101733409.S	loc101733409.S	1314	0	0	0	0	0	0	0	1	0	0	0	0
mi|Xelaev18043782m.g|	488	C	1	0	mbtd1.L	mbtd1.L	621	0	0	1	0	0	0	0	0	0	0	0	0
mi|Xelaev18034414m.g|	489	C	1	0	mlf2.L	mlf2.L	242	0	1	0	0	0	0	0	0	0	0	0	0
mi|Xelaev18011698m.g|	490	C	0	9	Xelaev18011698m.g	Xelaev18011698m.g	195	0	2	2	1	1	0	0	1	2	0	0	0
mi|Xelaev18014154m.g|	490		0	0	Xelaev18014154m.g	Xelaev18014154m.g	155	0	2	2	1	1	0	0	1	2	0	0	0
mi|Xelaev18037595m.g|	490		0	0	Xelaev18037595m.g	Xelaev18037595m.g	151	0	2	2	1	1	0	0	1	2	0	0	0
mi|Xelaev18007775m.g|	491	C	8	0	gtf2h3.L	gtf2h3.L	340	0	1	1	0	2	1	0	1	1	0	1	0
sp|P47929|LEG7_HUMAN_contaminant	492	C	3	0	Galectin-7 OS=Homo sapiens GN=LGALS7 PE=1 SV=2	Galectin-7 OS=Homo sapiens GN=LGALS7 PE=1 SV=2	136	0	0	0	2	0	0	0	0	0	0	1	0
mi|Xelaev18007419m.g|	493	C	0	5	thoc5.L	thoc5.L	678	0	1	1	0	0	1	0	1	1	0	0	0
mi|Xelaev18010363m.g|	493		0	0	thoc5.S	thoc5.S	678	0	1	1	0	0	1	0	1	1	0	0	0
mi|Xelaev18037898m.g|	494	C	0	7	Xelaev18037898m.g	Xelaev18037898m.g	194	0	2	2	0	0	0	0	1	2	0	0	0
mi|Xelaev18037805m.g|	494		0	0	Xelaev18037805m.g	Xelaev18037805m.g	194	0	2	2	0	0	0	0	1	2	0	0	0
mi|Xelaev18036189m.g|	494		0	0	Xelaev18036189m.g	Xelaev18036189m.g	194	0	2	2	0	0	0	0	1	2	0	0	0
mi|Xelaev18043153m.g|	495	C	3	0	med24.L	med24.L	988	0	0	2	0	0	0	0	1	0	0	0	0
mi|Xelaev18040945m.g|	496	C	0	4	clk2.L	clk2.L	537	0	0	1	0	0	0	0	0	1	0	2	0
mi|Xelaev18043018m.g|	496		0	0	clk2.S	clk2.S	491	0	0	1	0	0	0	0	0	1	0	2	0
mi|Xelaev18038554m.g|	497	C	1	0	cenpi.L	cenpi.L	686	0	0	1	0	0	0	0	0	0	0	0	0
mi|Xelaev18036870m.g|	498		0	0	mki67.S	mki67.S	2230	0	0	1	0	0	0	0	0	1	0	0	0
mi|Xelaev18034577m.g|	498	C	2	2	mki67.L	mki67.L	1959	0	0	1	0	1	1	0	0	1	0	0	0
mi|Xelaev18044454m.g|	499		0	0	ccnt2.L	ccnt2.L	728	0	1	2	0	2	2	0	1	3	0	2	0
mi|Xelaev18047005m.g|	499	C	8	13	ccnt2.S	ccnt2.S	720	0	2	4	0	2	3	0	3	5	0	2	0
mi|Xelaev18015814m.g|	499		0	0	ccnt1.S	ccnt1.S	662	0	0	0	0	1	1	0	0	1	0	1	0
mi|Xelaev18013299m.g|	499		0	0	ccnt1.L	ccnt1.L	629	0	0	0	0	1	1	0	0	1	0	1	0
mi|Xelaev18012573m.g|	500	C	2	6	kdm1a.L	kdm1a.L	830	0	1	2	0	2	1	0	1	1	0	0	0
mi|Xelaev18015253m.g|	500		0	0	kdm1a.S	kdm1a.S	739	0	1	1	0	1	1	0	1	1	0	0	0
mi|Xelaev18022534m.g|	501	C	0	1	nudt21.L	nudt21.L	227	0	0	1	0	0	0	0	0	0	0	0	0
mi|Xelaev18024791m.g|	501		0	0	nudt21.S	nudt21.S	215	0	0	1	0	0	0	0	0	0	0	0	0
mi|Xelaev18040541m.g|	502	C	0	4	mef2d.L	mef2d.L	748	0	1	1	0	1	0	0	1	0	0	0	0
mi|Xelaev18018405m.g|	502		0	0	mef2a.L	mef2a.L	516	0	1	1	0	1	0	0	1	0	0	0	0
mi|Xelaev18020460m.g|	502		0	0	mef2a.S	mef2a.S	501	0	1	1	0	1	0	0	1	0	0	0	0
mi|Xelaev18042779m.g|	502		0	0	mef2d.S	mef2d.S	498	0	1	1	0	1	0	0	1	0	0	0	0
mi|Xelaev18008088m.g|	502		0	0	mef2c.L	mef2c.L	464	0	1	1	0	1	0	0	1	0	0	0	0
mi|Xelaev18010830m.g|	502		0	0	mef2c.S	mef2c.S	464	0	1	1	0	1	0	0	1	0	0	0	0
mi|Xelaev18033828m.g|	503	C	0	2	fabp4.S	fabp4.S	135	0	1	0	0	0	1	0	0	0	0	0	0
mi|Xelaev18032137m.g|	503		0	0	fabp4.L	fabp4.L	133	0	1	0	0	0	1	0	0	0	0	0	0
mi|Xelaev18013735m.g|	504	C	0	1	Xelaev18013735m.g	Xelaev18013735m.g	211	0	0	1	0	0	0	0	0	0	0	0	0
mi|Xelaev18016186m.g|	504		0	0	Xelaev18016186m.g	Xelaev18016186m.g	210	0	0	1	0	0	0	0	0	0	0	0	0
mi|Xelaev18042519m.g|	504		0	0	Xelaev18042519m.g	Xelaev18042519m.g	163	0	0	1	0	0	0	0	0	0	0	0	0
mi|Xelaev18014401m.g|	505	C	0	18	pou2f1.S	pou2f1.S	760	0	4	2	0	3	2	0	3	2	0	2	0
mi|Xelaev18011327m.g|	505		0	0	pou2f1.L	pou2f1.L	747	0	4	2	0	3	2	0	3	2	0	2	0
mi|Xelaev18035961m.g|	505		0	0	pou2f2.L	pou2f2.L	658	0	2	1	0	2	2	0	2	2	0	2	0
mi|Xelaev18037730m.g|	505		0	0	pou2f2.S	pou2f2.S	655	0	2	1	0	2	2	0	2	2	0	2	0
mi|Xelaev18037419m.g|	505		0	0	pou2f3.S	pou2f3.S	413	0	2	1	0	2	2	0	2	2	0	2	0
mi|Xelaev18035378m.g|	505		0	0	pou2f3.L	pou2f3.L	404	0	2	1	0	2	2	0	2	2	0	2	0
mi|Xelaev18022280m.g|	506	C	0	2	cfl1.L	cfl1.L	292	0	0	0	0	0	0	0	1	0	0	0	1
mi|Xelaev18024191m.g|	506		0	0	cfl1.S	cfl1.S	168	0	0	0	0	0	0	0	1	0	0	0	1
mi|Xelaev18031704m.g|	507	C	1	0	dek.L	dek.L	391	0	0	1	0	0	0	0	0	0	0	0	0
mi|Xelaev18034528m.g|	508	C	8	0	nsmce4a.L	nsmce4a.L	386	0	0	0	0	2	0	0	2	2	0	2	0
mi|Xelaev18038842m.g|	509	C	8	0	sox3.L	sox3.L	307	0	1	1	0	1	1	0	2	1	0	1	0
mi|Xelaev18023869m.g|	510	C	1	0	wdr82.L	wdr82.L	313	0	0	0	0	1	0	0	0	0	0	0	0
mi|Xelaev18040064m.g|	511	C	1	0	loc100216173.L	loc100216173.L	264	0	0	1	0	0	0	0	0	0	0	0	0
mi|Xelaev18025804m.g|	512	C	0	1	rrp9.S	rrp9.S	464	0	0	1	0	0	0	0	0	0	0	0	0
mi|Xelaev18023860m.g|	512		0	0	rrp9.L	rrp9.L	462	0	0	1	0	0	0	0	0	0	0	0	0
mi|Xelaev18020399m.g|	513	C	1	0	wdr76.S	wdr76.S	584	0	0	0	0	1	0	0	0	0	0	0	0
mi|Xelaev18026970m.g|	514	C	1	0	med23.L	med23.L	1382	0	0	1	0	0	0	0	0	0	0	0	0
mi|Xelaev18039527m.g|	515	C	3	0	tdp1.L	tdp1.L	597	0	0	2	0	0	1	0	0	0	0	0	0
mi|Xelaev18044558m.g|	516	C	0	1	epc2.L	epc2.L	804	0	0	1	0	0	0	0	0	0	0	0	0
mi|Xelaev18047078m.g|	516		0	0	epc2.S	epc2.S	804	0	0	1	0	0	0	0	0	0	0	0	0
mi|Xelaev18046981m.g|	517	C	0	12	loc100493614.S	loc100493614.S	385	1	1	1	1	1	1	1	1	1	1	1	1
mi|Xelaev18044427m.g|	517		0	0	loc100493614.L	loc100493614.L	378	1	1	1	1	1	1	1	1	1	1	1	1
mi|Xelaev18001242m.g|	518	C	10	0	inip.S	inip.S	130	0	0	2	0	2	1	0	1	1	0	2	1
mi|Xelaev18025391m.g|	519	C	2	0	rpl5.S	rpl5.S	275	0	0	0	0	0	0	0	1	0	0	1	0
mi|Xelaev18024289m.g|	520	C	0	1	Xelaev18024289m.g	Xelaev18024289m.g	110	0	0	1	0	0	0	0	0	0	0	0	0
mi|Xelaev18022097m.g|	520		0	0	Xelaev18022097m.g	Xelaev18022097m.g	67	0	0	1	0	0	0	0	0	0	0	0	0
mi|Xelaev18036062m.g|	520		0	0	Xelaev18036062m.g	Xelaev18036062m.g	67	0	0	1	0	0	0	0	0	0	0	0	0
mi|Xelaev18021742m.g|	521	C	3	0	e2f8.L	e2f8.L	724	0	0	1	0	1	0	0	0	1	0	0	0
mi|Xelaev18025910m.g|	522	C	1	4	loc100192369.S	loc100192369.S	188	0	0	1	0	1	2	0	0	1	0	0	0
mi|Xelaev18025909m.g|	522		0	0	h1fx.S	h1fx.S	217	0	0	1	0	1	1	0	0	1	0	0	0
mi|Xelaev18034541m.g|	523	C	0	5	bub3.L	bub3.L	330	0	1	3	0	0	0	0	0	1	0	0	0
mi|Xelaev18036841m.g|	523		0	0	bub3.S	bub3.S	330	0	1	3	0	0	0	0	0	1	0	0	0
mi|Xelaev18014266m.g|	524	C	0	10	gabpa.S	gabpa.S	454	0	1	2	0	1	2	0	1	1	0	2	0
mi|Xelaev18011534m.g|	524		0	0	gabpa.L	gabpa.L	452	0	1	2	0	1	2	0	1	1	0	2	0
mi|Xelaev18006530m.g|	525	C	5	0	polr1e.L	polr1e.L	419	0	0	3	0	1	0	0	1	0	0	0	0
mi|Xelaev18043188m.g|	526	C	0	6	rpl23.L	rpl23.L	140	0	1	2	0	0	0	0	0	2	0	1	0
mi|Xelaev18045948m.g|	526		0	0	rpl23.S	rpl23.S	112	0	1	2	0	0	0	0	0	2	0	1	0
mi|Xelaev18005468m.g|	527		0	0	plrg1.L	plrg1.L	517	0	2	1	0	1	0	0	0	0	0	0	0
mi|Xelaev18009212m.g|	527	C	2	4	plrg1.S	plrg1.S	517	0	2	2	0	1	0	0	0	1	0	0	0
mi|Xelaev18031895m.g|	528	C	1	0	thoc1.L	thoc1.L	669	0	0	1	0	0	0	0	0	0	0	0	0
mi|Xelaev18007455m.g|	529	C	4	0	ung.L	ung.L	304	0	1	1	0	0	0	0	1	1	0	0	0
mi|Xelaev18032951m.g|	530	C	0	1	sri.S	sri.S	280	0	0	1	0	0	0	0	0	0	0	0	0
mi|Xelaev18030845m.g|	530		0	0	sri.L	sri.L	196	0	0	1	0	0	0	0	0	0	0	0	0
mi|Xelaev18030704m.g|	531	C	2	0	gtpbp4.L	gtpbp4.L	633	0	0	1	0	1	0	0	0	0	0	0	0
mi|Xelaev18034560m.g|	532	C	0	4	pwwp2b.L	pwwp2b.L	586	0	0	2	0	0	0	0	0	2	0	0	0
mi|Xelaev18036854m.g|	532		0	0	pwwp2b.S	pwwp2b.S	584	0	0	2	0	0	0	0	0	2	0	0	0
mi|Xelaev18008373m.g|	533	C	1	0	rad1.L	rad1.L	283	0	0	0	0	0	0	0	0	0	0	1	0
mi|Xelaev18018462m.g|	534	C	0	10	pias1.L	pias1.L	649	0	2	2	0	1	1	0	1	2	0	1	0
mi|Xelaev18020419m.g|	534		0	0	pias1.S	pias1.S	640	0	2	2	0	1	1	0	1	2	0	1	0
mi|Xelaev18040769m.g|	534		0	0	pias3.L	pias3.L	633	0	1	1	0	1	1	0	1	1	0	1	0
mi|Xelaev18011118m.g|	534		0	0	pias2.S	pias2.S	616	0	1	1	0	1	1	0	1	1	0	1	0
mi|Xelaev18008474m.g|	534		0	0	pias2.L	pias2.L	584	0	1	1	0	1	1	0	1	1	0	1	0
mi|Xelaev18042876m.g|	534		0	0	pias3.S	pias3.S	556	0	1	1	0	1	1	0	1	1	0	1	0
mi|Xelaev18005417m.g|	535	C	20	0	c4orf27.L	c4orf27.L	359	0	3	4	0	2	1	0	4	3	0	3	0
mi|Xelaev18008116m.g|	536	C	2	0	msh3.L	msh3.L	1069	0	0	0	0	0	0	0	0	2	0	0	0
mi|Xelaev18017000m.g|	537	C	2	0	ik.L	ik.L	608	0	0	0	0	0	1	0	0	0	0	1	0
mi|Xelaev18031110m.g|	538	C	0	10	rpl14.L	rpl14.L	138	0	1	2	0	0	1	1	1	2	0	1	1
mi|Xelaev18033167m.g|	538		0	0	rpl14.S	rpl14.S	138	0	1	2	0	0	1	1	1	2	0	1	1
mi|Xelaev18025189m.g|	539	C	0	11	prdx1.S	prdx1.S	199	1	1	1	1	1	1	1	1	1	0	1	1
mi|Xelaev18023072m.g|	539		0	0	prdx1.L	prdx1.L	199	1	1	1	1	1	1	1	1	1	0	1	1
mi|Xelaev18047428m.g|	540	C	0	4	hspd1.S	hspd1.S	579	0	0	0	1	0	1	0	0	0	0	0	2
mi|Xelaev18045048m.g|	540		0	0	hspd1.L	hspd1.L	576	0	0	0	1	0	1	0	0	0	0	0	2
mi|Xelaev18047164m.g|	541	C	0	1	loc101732597.S	loc101732597.S	717	0	1	0	0	0	0	0	0	0	0	0	0
mi|Xelaev18044681m.g|	541		0	0	loc101732597.L	loc101732597.L	716	0	1	0	0	0	0	0	0	0	0	0	0
mi|Xelaev18034050m.g|	542	C	4	0	chrac1.S	chrac1.S	142	0	1	0	0	1	1	0	1	0	0	0	0
mi|Xelaev18029664m.g|	543	C	1	0	Xelaev18029664m.g	Xelaev18029664m.g	260	0	0	0	0	0	0	0	0	1	0	0	0
mi|Xelaev18016127m.g|	544	C	0	7	ints6.S	ints6.S	974	0	1	2	0	0	0	0	1	1	0	1	1
mi|Xelaev18013667m.g|	544		0	0	ints6.L	ints6.L	883	0	1	2	0	0	0	0	1	1	0	1	1
mi|Xelaev18007683m.g|	545	C	0	1	ydjc.L	ydjc.L	308	0	0	0	0	0	0	0	0	0	0	1	0
mi|Xelaev18010528m.g|	545		0	0	ydjc.S	ydjc.S	308	0	0	0	0	0	0	0	0	0	0	1	0
mi|Xelaev18039104m.g|	546	C	0	2	Xelaev18039104m.g	Xelaev18039104m.g	317	0	0	1	0	0	0	0	0	0	0	0	1
mi|Xelaev18042402m.g|	546		0	0	Xelaev18042402m.g	Xelaev18042402m.g	276	0	0	1	0	0	0	0	0	0	0	0	1
mi|Xelaev18046205m.g|	547	C	0	3	aurka.S	aurka.S	408	0	1	1	0	1	0	0	0	0	0	0	0
mi|Xelaev18043488m.g|	547		0	0	aurka.L	aurka.L	407	0	1	1	0	1	0	0	0	0	0	0	0
mi|Xelaev18015505m.g|	548	C	2	7	Xelaev18015505m.g	Xelaev18015505m.g	147	0	2	1	0	1	1	0	2	1	0	1	0
mi|Xelaev18012938m.g|	548		0	0	Xelaev18012938m.g	Xelaev18012938m.g	192	0	1	1	0	1	1	0	1	1	0	1	0
mi|Xelaev18025962m.g|	549	C	0	1	tada3.S	tada3.S	432	0	0	1	0	0	0	0	0	0	0	0	0
mi|Xelaev18024072m.g|	549		0	0	tada3.L	tada3.L	432	0	0	1	0	0	0	0	0	0	0	0	0
mi|Xelaev18001238m.g|	550	C	2	0	akap2.S	akap2.S	839	0	0	0	0	0	0	0	1	0	0	1	0
mi|Xelaev18043750m.g|	551	C	7	29	alyref.L	alyref.L	256	0	5	5	0	6	5	0	3	5	0	5	2
mi|Xelaev18002043m.g|	551	C	21	0	alyref.S	alyref.S	256	0	7	7	0	8	7	0	6	6	0	7	2
mi|Xelaev18038182m.g|	552	C	1	0	pole3.L	pole3.L	147	0	0	1	0	0	0	0	0	0	0	0	0
mi|Xelaev18003301m.g|	553	C	2	0	Xetrov90006807m.L	Xetrov90006807m.L	2407	0	0	1	0	0	0	0	0	1	0	0	0
mi|Xelaev18029517m.g|	554	C	9	4	Xelaev18029517m.g	Xelaev18029517m.g	453	0	1	2	0	3	2	0	2	1	0	1	1
mi|Xelaev18027332m.g|	554		0	0	Xelaev18027332m.g	Xelaev18027332m.g	204	0	0	1	0	1	1	0	1	0	0	0	0
mi|Xelaev18020937m.g|	555	C	1	0	Xelaev18020937m.g	Xelaev18020937m.g	73	0	0	0	0	0	0	0	0	0	0	1	0
mi|Xelaev18042813m.g|	556		0	0	vps72.S	vps72.S	364	0	0	1	0	0	0	0	0	0	0	0	0
mi|Xelaev18040652m.g|	556	C	7	1	vps72.L	vps72.L	355	0	1	2	0	1	1	0	1	1	0	1	0
mi|Xelaev18015719m.g|	557	C	1	0	klf5.S	klf5.S	428	0	0	0	0	1	0	0	0	0	0	0	0
##mi|Xelaev18040587m.g|	558	C	1	0	####Xelaev18040587m.g	####Xelaev18040587m.g	117	0	0	1	0	0	0	0	0	0	0	0	0
mi|Xelaev18022865m.g|	559	C	1	0	anln-like.1.L	anln-like.1.L	864	0	0	1	0	0	0	0	0	0	0	0	0
mi|Xelaev18016889m.g|	560	C	0	13	skp1.L	skp1.L	221	0	1	3	0	2	1	0	2	1	0	2	1
mi|Xelaev18019996m.g|	560		0	0	skp1.S	skp1.S	163	0	1	3	0	2	1	0	2	1	0	2	1
mi|Xelaev18021206m.g|	561	C	0	3	Xelaev18021206m.g	Xelaev18021206m.g	197	0	0	0	0	1	0	0	1	1	0	0	0
mi|Xelaev18017507m.g|	561		0	0	Xelaev18017507m.g	Xelaev18017507m.g	147	0	0	0	0	1	0	0	1	1	0	0	0
mi|Xelaev18012185m.g|	562	C	0	8	dynll2.L	dynll2.L	129	0	0	1	0	1	1	0	1	2	0	1	1
mi|Xelaev18010464m.g|	562		0	0	dynll1.S	dynll1.S	89	0	0	1	0	1	1	0	1	2	0	1	1
mi|Xelaev18007559m.g|	562		0	0	dynll1.L	dynll1.L	89	0	0	1	0	1	1	0	1	2	0	1	1
mi|Xelaev18014993m.g|	562		0	0	dynll2.S	dynll2.S	89	0	0	1	0	1	1	0	1	2	0	1	1
mi|Xelaev18010526m.g|	563		0	0	hic2.S	hic2.S	544	0	0	2	0	0	0	0	0	0	0	0	0
mi|Xelaev18007681m.g|	563	C	3	2	hic2.L	hic2.L	538	0	0	2	0	1	1	0	0	1	0	0	0
mi|Xelaev18027302m.g|	564	C	0	2	syncrip.L	syncrip.L	627	0	0	1	0	0	0	0	1	0	0	0	0
mi|Xelaev18015161m.g|	564	C	0	11	hnrnpr.S	hnrnpr.S	532	0	2	3	0	2	0	0	0	2	0	1	1
mi|Xelaev18012475m.g|	564		0	0	hnrnpr.L	hnrnpr.L	532	0	2	3	0	2	0	0	0	2	0	1	1
mi|Xelaev18029408m.g|	564		0	0	syncrip.S	syncrip.S	624	0	1	2	0	1	0	0	1	1	0	1	1
mi|Xelaev18035356m.g|	565	C	0	11	rpl27a-like.L	rpl27a-like.L	148	0	1	2	0	2	1	0	1	1	1	1	1
mi|Xelaev18037431m.g|	565		0	0	rpl27a-like.S	rpl27a-like.S	148	0	1	2	0	2	1	0	1	1	1	1	1
mi|Xelaev18002134m.g|	566		0	0	senp6.L	senp6.L	1107	0	0	1	0	0	0	0	0	0	0	0	0
mi|Xelaev18029452m.g|	566	C	1	1	senp6.S	senp6.S	1103	0	0	1	0	0	0	0	0	1	0	0	0
mi|Xelaev18012890m.g|	567	C	0	3	msl3-like.1.L	msl3-like.1.L	355	0	0	1	0	1	1	0	0	0	0	0	0
mi|Xelaev18015463m.g|	567		0	0	msl3-like.1.S	msl3-like.1.S	260	0	0	1	0	1	1	0	0	0	0	0	0
mi|Xelaev18012629m.g|	568	C	0	16	Xelaev18012629m.g	Xelaev18012629m.g	177	0	2	2	0	2	2	0	2	1	0	2	3
mi|Xelaev18004063m.g|	568		0	0	Xelaev18004063m.g	Xelaev18004063m.g	177	0	2	2	0	2	2	0	2	1	0	2	3
mi|Xelaev18028961m.g|	568		0	0	Xelaev18028961m.g	Xelaev18028961m.g	167	0	0	1	0	1	1	0	1	0	0	1	1
mi|Xelaev18042224m.g|	569	C	1	0	nkap.S	nkap.S	326	0	0	1	0	0	0	0	0	0	0	0	0
sp|P31025|LCN1_HUMAN_contaminant	570	C	1	0	Lipocalin-1 OS=Homo sapiens GN=LCN1 PE=1 SV=1	Lipocalin-1 OS=Homo sapiens GN=LCN1 PE=1 SV=1	176	0	0	0	0	0	0	0	0	0	0	1	0
mi|Xelaev18031045m.g|	571		0	0	rpl15.L	rpl15.L	204	0	0	1	0	0	0	0	0	0	0	0	1
mi|Xelaev18033119m.g|	571	C	1	2	rpl15.S	rpl15.S	204	0	1	1	0	0	0	0	0	0	0	0	1
mi|Xelaev18005062m.g|	572	C	0	1	Xelaev18005062m.g	Xelaev18005062m.g	320	0	0	0	0	0	0	0	0	1	0	0	0
mi|Xelaev18005061m.g|	572		0	0	Xelaev18005061m.g	Xelaev18005061m.g	320	0	0	0	0	0	0	0	0	1	0	0	0
##mi|Xelaev18043981m.g|	573	C	1	0	####Xelaev18043981m.g	####Xelaev18043981m.g	67	0	0	1	0	0	0	0	0	0	0	0	0
mi|Xelaev18010873m.g|	574	C	1	2	fcho2.S	fcho2.S	770	0	0	0	0	0	1	0	0	0	0	1	1
mi|Xelaev18008144m.g|	574		0	0	fcho2.L	fcho2.L	792	0	0	0	0	0	1	0	0	0	0	0	1
mi|Xelaev18001533m.g|	575	C	1	0	kat8.L	kat8.L	412	0	1	0	0	0	0	0	0	0	0	0	0
mi|Xelaev18018476m.g|	576	C	0	2	morf4l1.L	morf4l1.L	388	0	0	1	0	1	0	0	0	0	0	0	0
mi|Xelaev18020406m.g|	576		0	0	morf4l1.S	morf4l1.S	372	0	0	1	0	1	0	0	0	0	0	0	0
mi|Xelaev18019201m.g|	577	C	0	2	mcm7.L	mcm7.L	720	0	0	0	0	2	0	0	0	0	0	0	0
mi|Xelaev18000877m.g|	577		0	0	mcm7.S	mcm7.S	720	0	0	0	0	2	0	0	0	0	0	0	0
mi|Xelaev18005702m.g|	578	C	0	2	ints12.L	ints12.L	464	0	0	1	0	0	0	0	1	0	0	0	0
mi|Xelaev18009398m.g|	578		0	0	ints12.S	ints12.S	464	0	0	1	0	0	0	0	1	0	0	0	0
sp|P01040|CYTA_HUMAN_contaminant	579	C	28	0	Cystatin-A OS=Homo sapiens GN=CSTA PE=1 SV=1	Cystatin-A OS=Homo sapiens GN=CSTA PE=1 SV=1	98	0	3	3	3	0	2	2	4	4	0	4	3
mi|Xelaev18018988m.g|	580	C	1	0	pin1.L	pin1.L	159	0	0	1	0	0	0	0	0	0	0	0	0
mi|Xelaev18038100m.g|	581	C	0	1	uba1.L	uba1.L	1060	0	1	0	0	0	0	0	0	0	0	0	0
mi|Xelaev18040992m.g|	581		0	0	uba1.S	uba1.S	1044	0	1	0	0	0	0	0	0	0	0	0	0
mi|Xelaev18018055m.g|	582	C	0	1	anxa2.L	anxa2.L	340	0	0	0	0	0	0	0	0	1	0	0	0
mi|Xelaev18020763m.g|	582		0	0	anxa2.S	anxa2.S	340	0	0	0	0	0	0	0	0	1	0	0	0
mi|Xelaev18032252m.g|	583	C	0	1	pabpc1.L	pabpc1.L	633	0	0	0	0	0	0	1	0	0	0	0	0
mi|Xelaev18033915m.g|	583		0	0	pabpc1.S	pabpc1.S	633	0	0	0	0	0	0	1	0	0	0	0	0
mi|Xelaev18043239m.g|	583		0	0	pabpc1l.L	pabpc1l.L	629	0	0	0	0	0	0	1	0	0	0	0	0
mi|Xelaev18012640m.g|	583		0	0	pabpc4.L	pabpc4.L	626	0	0	0	0	0	0	1	0	0	0	0	0
mi|Xelaev18046000m.g|	583		0	0	pabpc1l.S	pabpc1l.S	620	0	0	0	0	0	0	1	0	0	0	0	0
mi|Xelaev18047880m.g|	584	C	1	1	tceb2.S	tceb2.S	144	0	0	0	0	0	0	0	0	2	0	0	0
mi|Xelaev18045670m.g|	584		0	0	tceb2.L	tceb2.L	200	0	0	0	0	0	0	0	0	1	0	0	0
mi|Xelaev18035182m.g|	585	C	7	0	apitd1.L	apitd1.L	135	0	0	1	0	1	1	0	1	1	0	1	1
mi|Xelaev18009729m.g|	586	C	0	5	mbd3.S	mbd3.S	302	0	1	1	0	1	0	0	1	0	0	1	0
mi|Xelaev18006193m.g|	586		0	0	mbd3.L	mbd3.L	281	0	1	1	0	1	0	0	1	0	0	1	0
mi|Xelaev18005395m.g|	587	C	1	0	vegfc.L	vegfc.L	402	0	1	0	0	0	0	0	0	0	0	0	0
mi|Xelaev18014941m.g|	588	C	14	0	rbbp5.S	rbbp5.S	576	0	3	1	0	3	2	0	0	2	0	2	1
mi|Xelaev18025565m.g|	589	C	1	0	mkl1.S	mkl1.S	1020	0	0	0	0	0	0	0	0	0	0	1	0
mi|Xelaev18015619m.g|	590	C	0	2	arglu1.S	arglu1.S	265	0	0	0	0	0	0	0	1	0	0	1	0
mi|Xelaev18013081m.g|	590		0	0	arglu1.L	arglu1.L	265	0	0	0	0	0	0	0	1	0	0	1	0
##mi|Xelaev18011244m.g|	591	C	5	0	####maats1.L	####maats1.L	928	0	0	1	0	1	0	0	0	1	0	1	1
mi|Xelaev18007826m.g|	592	C	0	4	kdm2b.L	kdm2b.L	1214	0	0	1	0	1	0	0	1	0	0	1	0
mi|Xelaev18010645m.g|	592		0	0	kdm2b.S	kdm2b.S	885	0	0	1	0	1	0	0	1	0	0	1	0
mi|Xelaev18020583m.g|	593	C	0	1	lmnb3.S	lmnb3.S	622	0	1	0	0	0	0	0	0	0	0	0	0
mi|Xelaev18018277m.g|	593		0	0	lmnb3.L	lmnb3.L	583	0	1	0	0	0	0	0	0	0	0	0	0
mi|Xelaev18024023m.g|	594	C	0	3	arih2.L	arih2.L	492	0	1	0	0	0	1	0	0	0	0	1	0
mi|Xelaev18025928m.g|	594		0	0	arih2.S	arih2.S	489	0	1	0	0	0	1	0	0	0	0	1	0
##mi|Xelaev18024109m.g|	595	C	3	0	####Xelaev18024109m.g	####Xelaev18024109m.g	133	0	1	0	0	1	0	0	1	0	0	0	0
mi|Xelaev18018092m.g|	596	C	0	3	rbpms2.L	rbpms2.L	197	0	1	1	0	0	0	0	0	1	0	0	0
mi|Xelaev18020735m.g|	596		0	0	rbpms2.S	rbpms2.S	196	0	1	1	0	0	0	0	0	1	0	0	0
mi|Xelaev18036314m.g|	597	C	2	0	Xelaev18036314m.g	Xelaev18036314m.g	629	0	1	0	0	1	0	0	0	0	0	0	0
mi|Xelaev18005888m.g|	598	C	1	0	gtf2e2.L	gtf2e2.L	288	0	0	1	0	0	0	0	0	0	0	0	0
mi|Xelaev18044106m.g|	599	C	0	9	srsf2.L	srsf2.L	215	0	0	0	0	2	1	0	1	2	0	2	1
mi|Xelaev18046739m.g|	599		0	0	srsf2.S	srsf2.S	215	0	0	0	0	2	1	0	1	2	0	2	1
mi|Xelaev18006075m.g|	600	C	0	1	rpl36.L	rpl36.L	105	0	0	1	0	0	0	0	0	0	0	0	0
mi|Xelaev18009635m.g|	600		0	0	rpl36.S	rpl36.S	105	0	0	1	0	0	0	0	0	0	0	0	0
mi|Xelaev18032356m.g|	601	C	3	0	nsmce2.L	nsmce2.L	238	0	0	0	0	1	0	0	0	1	0	1	0
mi|Xelaev18040547m.g|	602	C	3	0	gpatch4.L	gpatch4.L	322	0	1	0	0	2	0	0	0	0	0	0	0
mi|Xelaev18015904m.g|	603	C	8	0	prim1.S	prim1.S	420	0	0	0	0	1	0	0	1	3	0	2	1
mi|Xelaev18025548m.g|	604	C	0	1	rpsa.S	rpsa.S	306	0	0	0	0	0	0	0	0	1	0	0	0
mi|Xelaev18023531m.g|	604		0	0	rpsa.L	rpsa.L	306	0	0	0	0	0	0	0	0	1	0	0	0
mi|Xelaev18032119m.g|	605	C	1	0	loc100495973.L	loc100495973.L	1577	0	0	0	0	0	0	0	0	0	0	1	0
mi|Xelaev18036872m.g|	606	C	4	0	foxi2.S	foxi2.S	369	0	0	1	0	0	0	0	1	1	0	1	0
mi|Xelaev18022739m.g|	607	C	2	0	faap24.L	faap24.L	216	0	0	1	0	1	0	0	0	0	0	0	0
mi|Xelaev18035926m.g|	608	C	1	0	rpl18.L	rpl18.L	233	0	0	1	0	0	0	0	0	0	0	0	0
mi|Xelaev18037076m.g|	609	C	0	3	Xelaev18037076m.g	Xelaev18037076m.g	338	0	0	1	0	1	0	0	0	1	0	0	0
mi|Xelaev18037072m.g|	609		0	0	Xelaev18037072m.g	Xelaev18037072m.g	269	0	0	1	0	1	0	0	0	1	0	0	0
mi|Xelaev18000696m.g|	609		0	0	Xelaev18000696m.g	Xelaev18000696m.g	258	0	0	1	0	1	0	0	0	1	0	0	0
mi|Xelaev18037065m.g|	609		0	0	Xelaev18037065m.g	Xelaev18037065m.g	175	0	0	1	0	1	0	0	0	1	0	0	0
mi|Xelaev18047431m.g|	610	C	3	0	Xelaev18047431m.g	Xelaev18047431m.g	2642	0	0	1	0	1	0	0	1	0	0	0	0
mi|Xelaev18021342m.g|	611	C	4	0	nhp2.S	nhp2.S	149	0	1	1	0	0	0	0	1	1	0	0	0
mi|Xelaev18020045m.g|	612	C	8	0	tcof1.S	tcof1.S	1586	0	1	2	0	2	2	0	0	1	0	0	0
##mi|Xelaev18009017m.g|	613	C	2	0	####Xetrov90000618m.S	####Xetrov90000618m.S	104	0	0	0	0	1	0	0	0	1	0	0	0
mi|Xelaev18022929m.g|	614	C	2	0	msh4.L	msh4.L	833	0	0	0	0	0	0	0	1	1	0	0	0
mi|Xelaev18019859m.g|	615	C	0	2	cecr2.S	cecr2.S	1230	0	0	1	0	1	0	0	0	0	0	0	0
mi|Xelaev18002539m.g|	615		0	0	cecr2.L	cecr2.L	1120	0	0	1	0	1	0	0	0	0	0	0	0
mi|Xelaev18042416m.g|	616	C	0	2	ring1.S	ring1.S	376	0	1	0	0	0	1	0	0	0	0	0	0
mi|Xelaev18039123m.g|	616		0	0	ring1.L	ring1.L	372	0	1	0	0	0	1	0	0	0	0	0	0
mi|Xelaev18023492m.g|	616		0	0	rnf2.L	rnf2.L	354	0	1	0	0	0	1	0	0	0	0	0	0
mi|Xelaev18025519m.g|	616		0	0	rnf2.S	rnf2.S	336	0	1	0	0	0	1	0	0	0	0	0	0
mi|Xelaev18015121m.g|	617	C	0	1	dnajc8.S	dnajc8.S	262	0	0	1	0	0	0	0	0	0	0	0	0
mi|Xelaev18012054m.g|	617		0	0	dnajc8.L	dnajc8.L	250	0	0	1	0	0	0	0	0	0	0	0	0
mi|Xelaev18019995m.g|	618	C	0	2	Xelaev18019995m.g	Xelaev18019995m.g	309	0	0	1	0	0	0	0	1	0	0	0	0
mi|Xelaev18006173m.g|	618		0	0	ppp2cb.L	ppp2cb.L	309	0	0	1	0	0	0	0	1	0	0	0	0
mi|Xelaev18009707m.g|	618		0	0	ppp2cb.S	ppp2cb.S	309	0	0	1	0	0	0	0	1	0	0	0	0
mi|Xelaev18019773m.g|	618		0	0	Xelaev18019773m.g	Xelaev18019773m.g	225	0	0	1	0	0	0	0	1	0	0	0	0
mi|Xelaev18010336m.g|	619	C	1	2	smtn.S	smtn.S	1005	0	1	0	0	2	0	0	0	0	0	0	0
mi|Xelaev18007387m.g|	619		0	0	smtn.L	smtn.L	996	0	1	0	0	1	0	0	0	0	0	0	0
mi|Xelaev18020917m.g|	620	C	1	0	taf3.S	taf3.S	927	0	1	0	0	0	0	0	0	0	0	0	0
mi|Xelaev18042169m.g|	621	C	6	0	sox3.S	sox3.S	309	0	1	1	0	2	0	0	1	1	0	0	0
mi|Xelaev18029980m.g|	622	C	4	0	slco2a1.S	slco2a1.S	636	0	0	0	1	0	0	0	1	1	0	1	0
mi|Xelaev18022810m.g|	623	C	4	1	rfwd3.L	rfwd3.L	751	0	0	0	0	1	0	0	2	0	0	1	1
mi|Xelaev18025010m.g|	623		0	0	rfwd3.S	rfwd3.S	750	0	0	0	0	0	0	0	1	0	0	0	0
mi|Xelaev18024869m.g|	624	C	0	1	rpl13.S	rpl13.S	211	0	0	0	0	0	0	0	0	0	0	1	0
mi|Xelaev18003572m.g|	624		0	0	rpl13.L	rpl13.L	211	0	0	0	0	0	0	0	0	0	0	1	0
mi|Xelaev18016053m.g|	625	C	1	0	sp1.S	sp1.S	732	0	0	0	0	1	0	0	0	0	0	0	0
mi|Xelaev18013590m.g|	626	C	3	0	sp1.L	sp1.L	722	0	0	0	0	1	0	0	0	1	0	1	0
mi|Xelaev18019102m.g|	627	C	15	0	gtf2f1.L	gtf2f1.L	524	0	2	3	0	2	2	0	2	2	0	1	1
mi|Xelaev18022123m.g|	628	C	4	0	pola2.L	pola2.L	673	0	0	0	0	1	0	0	2	0	0	0	1
mi|Xelaev18005905m.g|	629	C	0	2	ythdc1.L	ythdc1.L	629	0	0	0	0	0	0	0	0	1	0	1	0
mi|Xelaev18009579m.g|	629		0	0	ythdc1.S	ythdc1.S	548	0	0	0	0	0	0	0	0	1	0	1	0
mi|Xelaev18041159m.g|	630	C	2	0	siva1.S	siva1.S	163	0	0	0	0	0	1	0	0	0	0	1	0
mi|Xelaev18000461m.g|	631	C	12	0	sumo3.1	sumo3.1	67	0	1	4	1	4	2	1	3	3	1	4	2
mi|Xelaev18044053m.g|	631	C	0	28	sumo2.L	sumo2.L	98	0	2	4	1	4	3	1	3	4	1	3	2
mi|Xelaev18046699m.g|	631		0	0	sumo2.S	sumo2.S	95	0	2	4	1	4	3	1	3	4	1	3	2
mi|Xelaev18011478m.g|	632	C	1	0	donson.L	donson.L	579	0	0	0	0	0	0	0	0	1	0	0	0
##mi|Xelaev18000641m.g|	633	C	1	0	####Xelaev18000641m.g	####Xelaev18000641m.g	251	0	0	0	0	0	1	0	0	0	0	0	0
mi|Xelaev18034174m.g|	634	C	0	10	prss2.L	prss2.L	243	0	1	1	1	1	1	1	1	1	0	1	1
mi|Xelaev18034170m.g|	634		0	0	Xelaev18034170m.g	Xelaev18034170m.g	243	0	1	1	1	1	1	1	1	1	0	1	1
mi|Xelaev18034178m.g|	634		0	0	Xelaev18034178m.g	Xelaev18034178m.g	243	0	1	1	1	1	1	1	1	1	0	1	1
mi|Xelaev18034173m.g|	634		0	0	Xelaev18034173m.g	Xelaev18034173m.g	243	0	1	1	1	1	1	1	1	1	0	1	1
mi|Xelaev18036592m.g|	634		0	0	Xelaev18036592m.g	Xelaev18036592m.g	243	0	1	1	1	1	1	1	1	1	0	1	1
mi|Xelaev18034169m.g|	634		0	0	Xetrov90029048m.L	Xetrov90029048m.L	243	0	1	1	1	1	1	1	1	1	0	1	1
mi|Xelaev18034171m.g|	634		0	0	Xelaev18034171m.g	Xelaev18034171m.g	236	0	1	1	1	1	1	1	1	1	0	1	1
mi|Xelaev18036593m.g|	634		0	0	Xelaev18036593m.g	Xelaev18036593m.g	203	0	1	1	1	1	1	1	1	1	0	1	1
mi|Xelaev18002915m.g|	634		0	0	Xelaev18002915m.g	Xelaev18002915m.g	148	0	1	1	1	1	1	1	1	1	0	1	1
mi|Xelaev18026023m.g|	635	C	1	0	thoc7.S	thoc7.S	201	0	0	1	0	0	0	0	0	0	0	0	0
mi|Xelaev18012272m.g|	636	C	4	0	fance.L	fance.L	356	0	0	0	0	1	1	0	1	0	0	1	0
sp|P02754|LACB_BOVIN_contaminant	637	C	10	0	Beta-lactoglobulin OS=Bos taurus GN=LGB PE=1 SV=3	Beta-lactoglobulin OS=Bos taurus GN=LGB PE=1 SV=3	178	0	1	0	2	1	0	2	0	1	0	2	1
mi|Xelaev18031972m.g|	638	C	0	1	mcm3.L	mcm3.L	807	0	0	1	0	0	0	0	0	0	0	0	0
mi|Xelaev18028222m.g|	638		0	0	zmcm3.L	zmcm3.L	806	0	0	1	0	0	0	0	0	0	0	0	0
mi|Xelaev18028559m.g|	639	C	2	0	polh.S	polh.S	684	0	0	0	0	0	0	0	1	1	0	0	0
mi|Xelaev18006255m.g|	640	C	0	1	wdr18.L	wdr18.L	428	0	0	0	0	0	0	0	0	0	0	1	0
mi|Xelaev18009787m.g|	640		0	0	wdr18.S	wdr18.S	428	0	0	0	0	0	0	0	0	0	0	1	0
mi|Xelaev18009232m.g|	641	C	0	8	rps3a.S	rps3a.S	264	0	1	1	0	1	0	0	1	1	0	2	1
mi|Xelaev18005497m.g|	641		0	0	rps3a.L	rps3a.L	264	0	1	1	0	1	0	0	1	1	0	2	1
mi|Xelaev18009608m.g|	642	C	0	1	polr2b.S	polr2b.S	1510	0	0	1	0	0	0	0	0	0	0	0	0
mi|Xelaev18006059m.g|	642		0	0	polr2b.L	polr2b.L	1174	0	0	1	0	0	0	0	0	0	0	0	0
##mi|Xelaev18005345m.g|	643	C	3	0	####tlr3.L	####tlr3.L	896	0	0	0	0	1	0	0	1	1	0	0	0
mi|Xelaev18033383m.g|	644		0	0	Xelaev18033383m.g	Xelaev18033383m.g	378	0	0	0	0	1	0	0	0	0	0	0	0
mi|Xelaev18031639m.g|	644	C	1	1	Xelaev18031639m.g	Xelaev18031639m.g	374	0	0	1	0	1	0	0	0	0	0	0	0
mi|Xelaev18032150m.g|	645	C	0	1	e2f5.L	e2f5.L	371	0	0	1	0	0	0	0	0	0	0	0	0
mi|Xelaev18033843m.g|	645		0	0	e2f5.S	e2f5.S	371	0	0	1	0	0	0	0	0	0	0	0	0
##mi|Xelaev18027521m.g|	646	C	1	0	####acap2.L	####acap2.L	791	0	0	1	0	0	0	0	0	0	0	0	0
mi|Xelaev18043931m.g|	647	C	0	3	ahcy.L	ahcy.L	433	1	0	0	0	1	0	1	0	0	0	0	0
mi|Xelaev18046612m.g|	647		0	0	ahcy.S	ahcy.S	433	1	0	0	0	1	0	1	0	0	0	0	0
mi|Xelaev18039900m.g|	648	C	1	0	med6.L	med6.L	246	0	0	0	0	1	0	0	0	0	0	0	0
mi|Xelaev18007815m.g|	649	C	0	10	bcl7a.L	bcl7a.L	231	0	1	2	0	2	0	0	2	2	0	1	0
mi|Xelaev18010632m.g|	649		0	0	bcl7a.S	bcl7a.S	229	0	1	2	0	2	0	0	2	2	0	1	0
mi|Xelaev18001520m.g|	649		0	0	bcl7c.L	bcl7c.L	209	0	1	1	0	1	0	0	1	1	0	1	0
mi|Xelaev18014200m.g|	649		0	0	bcl7b.S	bcl7b.S	189	0	1	1	0	1	0	0	1	1	0	1	0
mi|Xelaev18011643m.g|	649		0	0	bcl7b.L	bcl7b.L	189	0	1	1	0	1	0	0	1	1	0	1	0
mi|Xelaev18026785m.g|	650	C	0	5	dpy30.L	dpy30.L	99	0	1	1	0	1	1	0	0	0	0	0	1
mi|Xelaev18029030m.g|	650		0	0	dpy30.S	dpy30.S	99	0	1	1	0	1	1	0	0	0	0	0	1
mi|Xelaev18044480m.g|	651	C	9	0	des.1.L	des.1.L	458	0	1	0	1	1	1	1	1	1	1	0	1
mi|Xelaev18014519m.g|	652	C	4	0	Xelaev18014519m.g	Xelaev18014519m.g	906	0	0	0	0	1	1	0	0	1	0	1	0
mi|Xelaev18032199m.g|	653	C	1	0	rad54b.L	rad54b.L	855	0	0	1	0	0	0	0	0	0	0	0	0
mi|Xelaev18027049m.g|	654	C	2	0	pcmt1.L	pcmt1.L	302	0	0	0	0	0	1	0	1	0	0	0	0
mi|Xelaev18017900m.g|	655	C	0	1	nrf1.L	nrf1.L	523	0	0	0	0	1	0	0	0	0	0	0	0
mi|Xelaev18020877m.g|	655		0	0	nrf1.S	nrf1.S	523	0	0	0	0	1	0	0	0	0	0	0	0
mi|Xelaev18019144m.g|	656	C	0	1	c17orf49.L	c17orf49.L	291	0	0	1	0	0	0	0	0	0	0	0	0
mi|Xelaev18000844m.g|	656		0	0	c17orf49.S	c17orf49.S	283	0	0	1	0	0	0	0	0	0	0	0	0
mi|Xelaev18026812m.g|	657	C	8	0	gtf2h5.L	gtf2h5.L	71	0	1	1	0	1	1	0	1	1	0	1	1
mi|Xelaev18018224m.g|	658	C	0	4	myef2.L	myef2.L	673	0	0	1	0	0	1	0	1	1	0	0	0
mi|Xelaev18020620m.g|	658		0	0	myef2.S	myef2.S	609	0	0	1	0	0	1	0	1	1	0	0	0
mi|Xelaev18030266m.g|	659	C	7	0	Xelaev18030266m.g	Xelaev18030266m.g	747	0	0	1	1	1	1	1	1	0	0	1	0
mi|Xelaev18023422m.g|	660	C	1	0	rtca.L	rtca.L	406	0	0	1	0	0	0	0	0	0	0	0	0
mi|Xelaev18035769m.g|	661	C	0	1	Xelaev18035769m.g	Xelaev18035769m.g	169	0	1	0	0	0	0	0	0	0	0	0	0
mi|Xelaev18037587m.g|	661		0	0	Xelaev18037587m.g	Xelaev18037587m.g	128	0	1	0	0	0	0	0	0	0	0	0	0
mi|Xelaev18001060m.g|	662		0	0	senp3.S	senp3.S	459	0	0	1	0	0	0	0	0	0	0	1	0
mi|Xelaev18019582m.g|	662	C	1	2	senp3.L	senp3.L	459	0	0	2	0	0	0	0	0	0	0	1	0
##mi|Xelaev18026974m.g|	663	C	8	0	####epb41l2.L	####epb41l2.L	966	0	1	1	1	1	1	0	1	1	0	1	0
mi|Xelaev18009924m.g|	664	C	0	1	znf420.S	znf420.S	531	0	0	0	0	0	0	0	1	0	0	0	0
mi|Xelaev18006444m.g|	664		0	0	znf420.L	znf420.L	405	0	0	0	0	0	0	0	1	0	0	0	0
mi|Xelaev18005008m.g|	665	C	1	0	polr1a.L	polr1a.L	1729	0	0	1	0	0	0	0	0	0	0	0	0
mi|Xelaev18022836m.g|	666	C	0	1	csnk2a2.L	csnk2a2.L	349	0	0	0	0	0	1	0	0	0	0	0	0
mi|Xelaev18024992m.g|	666		0	0	csnk2a2.S	csnk2a2.S	349	0	0	0	0	0	1	0	0	0	0	0	0
mi|Xelaev18041822m.g|	667	C	0	8	rpl35.S	rpl35.S	244	0	1	1	0	1	1	0	1	1	0	1	1
mi|Xelaev18038443m.g|	667		0	0	rpl35.L	rpl35.L	137	0	1	1	0	1	1	0	1	1	0	1	1
mi|Xelaev18025231m.g|	668	C	2	0	rad54l.S	rad54l.S	791	0	0	1	0	0	1	0	0	0	0	0	0
mi|Xelaev18021058m.g|	669	C	0	1	ing3.S	ing3.S	417	0	0	1	0	0	0	0	0	0	0	0	0
mi|Xelaev18017657m.g|	669		0	0	ing3.L	ing3.L	416	0	0	1	0	0	0	0	0	0	0	0	0
mi|Xelaev18020021m.g|	670	C	3	0	hspa9.S	hspa9.S	670	0	0	0	1	0	0	1	0	0	0	1	0
mi|Xelaev18045011m.g|	671	C	0	1	wdr75.L	wdr75.L	832	0	0	1	0	0	0	0	0	0	0	0	0
mi|Xelaev18047406m.g|	671		0	0	wdr75.S	wdr75.S	799	0	0	1	0	0	0	0	0	0	0	0	0
mi|Xelaev18027574m.g|	672	C	4	0	nceh1.L	nceh1.L	408	0	0	0	0	1	1	0	1	1	0	0	0
mi|Xelaev18039133m.g|	673	C	1	0	kifc1.L	kifc1.L	643	0	0	0	0	0	0	0	1	0	0	0	0
mi|Xelaev18035653m.g|	674	C	5	0	cpsf3l.L	cpsf3l.L	600	0	0	1	0	1	0	0	1	1	0	0	1
mi|Xelaev18037238m.g|	675	C	0	7	prpf19.S	prpf19.S	504	0	1	1	0	1	1	0	1	1	0	1	0
mi|Xelaev18000054m.g|	675		0	0	prpf19.L	prpf19.L	504	0	1	1	0	1	1	0	1	1	0	1	0
mi|Xelaev18034881m.g|	676	C	5	0	nolc1.L	nolc1.L	1036	0	1	1	0	0	0	0	1	1	0	1	0
mi|Xelaev18034355m.g|	677	C	0	1	tpi1.L	tpi1.L	248	0	0	0	0	0	0	0	0	0	0	0	1
mi|Xelaev18036709m.g|	677		0	0	tpi1.S	tpi1.S	248	0	0	0	0	0	0	0	0	0	0	0	1
mi|Xelaev18010536m.g|	678	C	2	0	ppil2.S	ppil2.S	521	0	0	1	0	0	0	0	1	0	0	0	0
mi|Xelaev18043840m.g|	679	C	0	12	Xelaev18043840m.g	Xelaev18043840m.g	136	0	1	2	0	2	0	0	2	3	0	1	1
mi|Xelaev18046508m.g|	679		0	0	Xelaev18046508m.g	Xelaev18046508m.g	136	0	1	2	0	2	0	0	2	3	0	1	1
mi|Xelaev18006153m.g|	679		0	0	Xelaev18006153m.g	Xelaev18006153m.g	117	0	1	1	0	1	0	0	1	1	0	1	1
mi|Xelaev18041589m.g|	680	C	0	5	rpl7a.S	rpl7a.S	293	0	1	1	1	1	0	0	1	0	0	0	0
mi|Xelaev18038372m.g|	680		0	0	rpl7a.L	rpl7a.L	278	0	1	1	1	1	0	0	1	0	0	0	0
mi|Xelaev18014477m.g|	681	C	0	4	u2af1.S	u2af1.S	245	0	0	1	0	1	0	0	1	1	0	0	0
mi|Xelaev18011218m.g|	681		0	0	u2af1.L	u2af1.L	239	0	0	1	0	1	0	0	1	1	0	0	0
mi|Xelaev18044992m.g|	682	C	1	0	loc100488441.L	loc100488441.L	1029	0	0	1	0	0	0	0	0	0	0	0	0
##mi|Xelaev18006711m.g|	683	C	1	0	####aco1.L	####aco1.L	891	0	0	0	0	0	0	0	0	0	0	1	0
##mi|Xelaev18035176m.g|	684	C	1	0	####nmnat1.L	####nmnat1.L	319	0	0	0	0	0	0	0	1	0	0	0	0
mi|Xelaev18021149m.g|	685	C	0	1	nap1l1.S	nap1l1.S	547	0	0	1	0	0	0	0	0	0	0	0	0
mi|Xelaev18024673m.g|	685		0	0	nap1l4.S	nap1l4.S	360	0	0	1	0	0	0	0	0	0	0	0	0
##mi|Xelaev18012938m.g|	686	C	1	0	####Xelaev18012938m.g	####Xelaev18012938m.g	192	0	0	0	0	0	0	0	0	0	0	0	1
mi|Xelaev18034644m.g|	687	C	1	0	slf2.L	slf2.L	1021	0	0	0	0	0	0	0	1	0	0	0	0
mi|Xelaev18036190m.g|	688	C	3	0	loc100490816.L	loc100490816.L	165	0	1	0	0	0	0	0	1	0	0	1	0
##mi|Xelaev18010603m.g|	689	C	1	0	####loc101734664.S	####loc101734664.S	200	0	0	0	0	0	1	0	0	0	0	0	0
mi|Xelaev18044306m.g|	690	C	0	6	rpl13a.L	rpl13a.L	272	0	1	1	0	1	0	0	0	1	0	1	1
mi|Xelaev18046892m.g|	690		0	0	rpl13a.S	rpl13a.S	231	0	1	1	0	1	0	0	0	1	0	1	1
mi|Xelaev18013054m.g|	691	C	0	2	pcid2.L	pcid2.L	399	0	0	1	0	0	0	0	0	1	0	0	0
mi|Xelaev18015587m.g|	691		0	0	pcid2.S	pcid2.S	399	0	0	1	0	0	0	0	0	1	0	0	0
mi|Xelaev18026692m.g|	692	C	0	1	wtap.L	wtap.L	398	0	0	1	0	0	0	0	0	0	0	0	0
mi|Xelaev18028949m.g|	692		0	0	wtap.S	wtap.S	393	0	0	1	0	0	0	0	0	0	0	0	0
mi|Xelaev18017255m.g|	693	C	0	4	rpl26.L	rpl26.L	177	0	0	1	0	1	0	0	1	0	0	1	0
mi|Xelaev18021410m.g|	693		0	0	rpl26.S	rpl26.S	145	0	0	1	0	1	0	0	1	0	0	1	0
mi|Xelaev18010540m.g|	694	C	0	1	cdc45.S	cdc45.S	580	0	0	1	0	0	0	0	0	0	0	0	0
mi|Xelaev18007695m.g|	694		0	0	cdc45.L	cdc45.L	567	0	0	1	0	0	0	0	0	0	0	0	0

## Sheet: Uniprot
								total spectral counts
Protein	Group ID	Collapsed?	Unique Peptides	Razor Peptides	Gene	Description	SeqLen	RF_A0	RF_A1	RF_A2	RF_B0	RF_B1	RF_B2	RF_C0	RF_C1	RF_C2	RF_D0	RF_D1	RF_D2
sp|Q9W603|SP16H_XENLA	0	C	0	327	supt16h	FACT complex subunit SPT16 OS=Xenopus laevis GN=supt16h PE=1 SV=2	1035	3	37	49	7	42	33	5	39	37	6	40	29
tr|Q5FWP3|Q5FWP3_XENLA	0	C	12	0	LOC733160	LOC733160 protein (Fragment) OS=Xenopus laevis GN=LOC733160 PE=2 SV=1	474	1	13	13	1	12	10	2	11	12	2	12	8
tr|B7ZQW8|B7ZQW8_XENLA	0		0	0	SUPT16H	SUPT16H protein OS=Xenopus laevis GN=SUPT16H PE=2 SV=1	1035	3	37	49	7	42	33	5	39	37	6	40	29
tr|Q2TAH7|Q2TAH7_XENLA	0	C	6	0		Uncharacterized protein OS=Xenopus laevis PE=2 SV=1	508	1	15	19	5	17	15	2	15	17	3	19	13
sp|Q08D75|BRD4A_XENLA	1	C	14	155	brd4-a	Bromodomain-containing protein 4A OS=Xenopus laevis GN=brd4-a PE=2 SV=1	1351	0	22	31	0	23	18	0	24	23	0	22	6
sp|Q6DFF2|BRD4B_XENLA	1	C	58	0	brd4-b	Bromodomain-containing protein 4B OS=Xenopus laevis GN=brd4-b PE=2 SV=1	1362	0	19	24	0	21	19	0	21	21	0	18	9
tr|Q4V861|Q4V861_XENLA	1		0	0	LOC443648	LOC443648 protein (Fragment) OS=Xenopus laevis GN=LOC443648 PE=2 SV=1	572	0	15	19	0	14	12	0	15	14	0	16	4
tr|Q6GNR0|Q6GNR0_XENLA	1		0	0	LOC443648	LOC443648 protein (Fragment) OS=Xenopus laevis GN=LOC443648 PE=2 SV=1	559	0	15	19	0	14	12	0	15	14	0	16	4
tr|A1L1G8|A1L1G8_XENLA	1	C	5	0	brd3	LOC100036838 protein OS=Xenopus laevis GN=brd3 PE=2 SV=1	783	0	3	4	0	2	2	0	2	3	0	0	1
tr|A0A068ENH4|A0A068ENH4_XENLA	2	C	30	0	FAN1	FANCD2/FANCI-associated nuclease 1 (Fragment) OS=Xenopus laevis GN=FAN1 PE=2 SV=1	1017	0	0	1	0	3	2	0	8	7	0	6	3
sp|Q6GMY9|XPO2_XENLA	3	C	51	0	cse1l	Exportin-2 OS=Xenopus laevis GN=cse1l PE=2 SV=1	971	0	7	8	0	5	6	1	7	8	0	8	1
tr|Q8UVU1|Q8UVU1_XENLA	4	C	1	74		DNA ligase OS=Xenopus laevis PE=2 SV=1	906	0	9	11	0	10	10	0	11	11	0	7	6
tr|Q8UVU2|Q8UVU2_XENLA	4	C	0	26	lig3	DNA ligase OS=Xenopus laevis GN=lig3 PE=2 SV=1	988	0	12	14	0	14	13	0	13	15	0	10	9
tr|Q6IRA7|Q6IRA7_XENLA	4		0	0	LOC398275	DNA ligase OS=Xenopus laevis GN=LOC398275 PE=2 SV=1	933	0	12	14	0	14	13	0	13	15	0	10	9
tr|Q7ZXT1|Q7ZXT1_XENLA	5	C	7	0	LOC398513	LOC398513 protein (Fragment) OS=Xenopus laevis GN=LOC398513 PE=2 SV=1	407	0	1	0	0	1	1	0	0	2	0	0	2
tr|Q7T0M0|Q7T0M0_XENLA	6	C	1	0		MGC69165 protein OS=Xenopus laevis PE=2 SV=1	450	0	0	1	0	0	0	0	0	0	0	0	0
sp|Q9DE27|RUVB2_XENLA	7	C	0	58	ruvbl2	RuvB-like 2 OS=Xenopus laevis GN=ruvbl2 PE=2 SV=1	462	0	7	9	0	8	7	0	7	8	0	7	5
tr|Q0IH85|Q0IH85_XENLA	7	C	7	0	ruvbl2	LOC398205 protein OS=Xenopus laevis GN=ruvbl2 PE=2 SV=1	462	0	8	10	0	8	8	0	8	9	0	8	5
tr|Q801R1|Q801R1_XENLA	7		0	0		Ruvbl2-prov protein OS=Xenopus laevis PE=2 SV=1	462	0	7	9	0	8	7	0	7	8	0	7	5
tr|Q52L27|Q52L27_XENLA	8	C	27	4	LOC733207	LOC733207 protein (Fragment) OS=Xenopus laevis GN=LOC733207 PE=2 SV=1	1416	0	4	7	0	4	3	0	4	4	0	4	1
tr|Q52L26|Q52L26_XENLA	8		0	0	LOC733208	LOC733208 protein (Fragment) OS=Xenopus laevis GN=LOC733208 PE=2 SV=1	722	0	0	1	0	0	0	0	1	1	0	1	0
tr|Q7ZY22|Q7ZY22_XENLA	9	C	86	36	smarcc1	Smarcc1 protein OS=Xenopus laevis GN=smarcc1 PE=2 SV=2	1226	0	15	23	0	16	13	0	16	16	0	13	10
tr|Q6INX5|Q6INX5_XENLA	9		0	0	smarcc2	MGC80068 protein OS=Xenopus laevis GN=smarcc2 PE=2 SV=1	1109	0	5	6	0	6	4	0	4	4	0	3	4
tr|O57674|O57674_XENLA	9		0	0		Transcription factor, BAF subunit (Fragment) OS=Xenopus laevis PE=2 SV=2	40	0	1	1	0	1	0	0	0	1	0	0	0
tr|Q76LD3|Q76LD3_XENLA	10	C	0	5	pold3	DNA polymerase delta p66 subunit OS=Xenopus laevis GN=pold3 PE=2 SV=1	454	0	0	0	0	0	0	0	2	3	0	0	0
tr|Q6DDT8|Q6DDT8_XENLA	10		0	0	POLD3	POLD3 protein (Fragment) OS=Xenopus laevis GN=POLD3 PE=2 SV=1	476	0	0	0	0	0	0	0	2	3	0	0	0
tr|Q52KS2|Q52KS2_XENLA	10		0	0	POLD3	POLD3 protein (Fragment) OS=Xenopus laevis GN=POLD3 PE=2 SV=1	474	0	0	0	0	0	0	0	2	3	0	0	0
tr|Q6DJJ1|Q6DJJ1_XENLA	11	C	11	0	rps25	MGC82151 protein OS=Xenopus laevis GN=rps25 PE=2 SV=1	125	0	2	1	1	2	1	0	1	1	0	2	0
tr|Q6IP16|Q6IP16_XENLA	12	C	20	0	dnttip1	MGC79023 protein OS=Xenopus laevis GN=dnttip1 PE=2 SV=1	309	0	4	4	0	4	3	0	4	4	0	5	3
tr|Q6PCF3|Q6PCF3_XENLA	12	C	21	11	MGC69166	MGC69166 protein OS=Xenopus laevis GN=MGC69166 PE=2 SV=1	304	0	3	6	0	4	4	0	5	4	0	3	3
tr|Q642P5|Q642P5_XENLA	13	C	2	0	dbt	MGC85493 protein OS=Xenopus laevis GN=dbt PE=2 SV=1	492	0	0	1	0	0	0	0	1	0	0	0	0
tr|D2JYR7|D2JYR7_XENLA	14	C	176	0	fanci	Fanconi anemia complementation group I transcript variant 1 OS=Xenopus laevis GN=fanci PE=2 SV=1	1337	0	19	19	0	23	23	0	23	24	0	26	19
sp|Q7ZZY3|TOB1B_XENLA	15		0	0	topbp1-B	DNA topoisomerase 2-binding protein 1-B OS=Xenopus laevis GN=topbp1-B PE=2 SV=1	1513	0	13	16	0	19	13	0	17	19	0	15	10
sp|Q800K6|TOB1A_XENLA	15	C	20	122	topbp1-A	DNA topoisomerase 2-binding protein 1-A OS=Xenopus laevis GN=topbp1-A PE=1 SV=2	1513	0	15	19	0	20	15	0	20	22	0	19	12
tr|Q7ZWN3|Q7ZWN3_XENLA	16	C	88	42	chd4	B230399n07 protein OS=Xenopus laevis GN=chd4 PE=2 SV=1	1893	0	20	21	0	20	15	0	14	17	0	15	8
tr|O73820|O73820_XENLA	16		0	0		Mi-2 (Fragment) OS=Xenopus laevis PE=2 SV=1	410	0	8	6	0	6	7	0	3	5	0	4	3
tr|Q4JNX8|Q4JNX8_XENLA	17	C	0	18	RTS	RECQL4-helicase-like protein OS=Xenopus laevis GN=RTS PE=2 SV=1	1500	0	1	4	0	5	0	0	2	3	0	3	0
tr|B1WBC8|B1WBC8_XENLA	17		0	0	rts	Rts protein OS=Xenopus laevis GN=rts PE=1 SV=1	1504	0	1	4	0	5	0	0	2	3	0	3	0
tr|Q33DM4|Q33DM4_XENLA	17		0	0	recql4	RecQ4 protein OS=Xenopus laevis GN=recql4 PE=2 SV=1	1503	0	1	4	0	5	0	0	2	3	0	3	0
tr|A1L3K3|A1L3K3_XENLA	18	C	16	29	LOC100037031	LOC100037031 protein (Fragment) OS=Xenopus laevis GN=LOC100037031 PE=2 SV=1	269	2	4	0	4	4	6	5	4	2	4	5	5
tr|Q6AZV1|Q6AZV1_XENLA	18	C	19	33	hsp90ab1	Hsp90beta OS=Xenopus laevis GN=hsp90ab1 PE=2 SV=1	722	5	8	4	8	6	8	6	8	6	6	7	9
tr|Q5U7J0|Q5U7J0_XENLA	18		0	0		Hsp90alpha (Fragment) OS=Xenopus laevis PE=2 SV=1	100	1	3	1	3	3	2	2	3	2	2	2	3
tr|Q91662|Q91662_XENLA	18		0	0	Hsp90	Heat shock protein 90 (Fragment) OS=Xenopus laevis GN=Hsp90 PE=4 SV=1	102	1	3	0	3	3	3	3	3	2	2	3	3
tr|Q6GPV9|Q6GPV9_XENLA	18	C	13	8	hsp90aa1.1	MGC82579 protein OS=Xenopus laevis GN=hsp90aa1.1 PE=2 SV=1	729	3	8	5	7	7	8	5	7	5	4	6	8
tr|A2VD63|A2VD63_XENLA	18		0	0		Uncharacterized protein OS=Xenopus laevis PE=2 SV=1	805	0	1	0	1	1	1	1	1	1	1	1	1
tr|Q7ZTB3|Q7ZTB3_XENLA	18		0	0	hsp90b1	Heat shock protein gp96 OS=Xenopus laevis GN=hsp90b1 PE=2 SV=1	804	0	1	0	1	1	1	1	1	1	1	1	1
tr|Q6PAE3|Q6PAE3_XENLA	18		0	0	MGC68448	MGC68448 protein OS=Xenopus laevis GN=MGC68448 PE=2 SV=1	805	0	1	0	1	1	1	1	1	1	1	1	1
tr|Q6PI76|Q6PI76_XENLA	19	C	16	0	rps14	Rps14-prov protein OS=Xenopus laevis GN=rps14 PE=2 SV=1	151	0	2	2	0	1	2	1	2	1	1	2	2
tr|Q5BIY0|Q5BIY0_XENLA	20	C	0	8	MGC84994	MGC84994 protein OS=Xenopus laevis GN=MGC84994 PE=2 SV=1	76	0	1	1	0	1	0	1	1	1	0	1	1
tr|Q71U69|Q71U69_XENLA	20		0	0	erh	Enhancer of rudimentary homolog OS=Xenopus laevis GN=erh PE=2 SV=1	104	0	1	1	0	1	0	1	1	1	0	1	1
tr|Q4QQP4|Q4QQP4_XENLA	21	C	58	0	rfc3	MGC115007 protein OS=Xenopus laevis GN=rfc3 PE=2 SV=1	356	0	6	6	0	10	7	0	9	7	0	8	5
sp|Q07254|RS10_XENLA	22	C	0	5	rps10	40S ribosomal protein S10 OS=Xenopus laevis GN=rps10 PE=1 SV=1	165	0	0	1	0	1	0	0	1	1	0	1	0
tr|B7ZPG6|B7ZPG6_XENLA	22		0	0	rps10	40S ribosomal small subunit protein S10 OS=Xenopus laevis GN=rps10 PE=2 SV=1	165	0	0	1	0	1	0	0	1	1	0	1	0
tr|Q6GNB4|Q6GNB4_XENLA	22		0	0	LOC445824	LOC445824 protein (Fragment) OS=Xenopus laevis GN=LOC445824 PE=2 SV=1	174	0	0	1	0	1	0	0	1	1	0	1	0
tr|Q7SZU3|Q7SZU3_XENLA	22		0	0		Rps10-prov protein OS=Xenopus laevis PE=2 SV=1	165	0	0	1	0	1	0	0	1	1	0	1	0
tr|A9UMQ0|A9UMQ0_XENLA	23	C	41	0	pnkp	LOC100137702 protein OS=Xenopus laevis GN=pnkp PE=2 SV=1	548	0	4	7	0	4	4	0	6	6	0	4	6
sp|Q6GNV6|COM1_XENLA	24	C	49	0	rbbp8	DNA endonuclease RBBP8 OS=Xenopus laevis GN=rbbp8 PE=1 SV=1	856	0	6	7	0	8	3	0	7	9	0	5	4
sp|P18248|PCNA_XENLA	25	C	0	51	pcna	Proliferating cell nuclear antigen OS=Xenopus laevis GN=pcna PE=2 SV=1	261	0	5	6	0	6	5	0	8	8	0	7	6
tr|Q9I893|Q9I893_XENLA	25		0	0	PCNA	Proliferating cell nuclear antigen OS=Xenopus laevis GN=PCNA PE=2 SV=1	261	0	5	6	0	6	5	0	8	8	0	7	6
tr|Q6PF20|Q6PF20_XENLA	25		0	0	pcna	Proliferating cell nuclear antigen OS=Xenopus laevis GN=pcna PE=2 SV=1	261	0	5	6	0	6	5	0	8	8	0	7	6
tr|Q5U4U8|Q5U4U8_XENLA	26	C	197	0	LOC495429	LOC495429 protein (Fragment) OS=Xenopus laevis GN=LOC495429 PE=2 SV=1	1378	0	26	33	0	29	25	0	23	27	0	20	14
tr|Q5EAU7|Q5EAU7_XENLA	27	C	1	0	tdrkh	MGC85144 protein OS=Xenopus laevis GN=tdrkh PE=2 SV=1	718	0	0	1	0	0	0	0	0	0	0	0	0
tr|B1H1X2|B1H1X2_XENLA	28	C	2	0	LOC100158324	LOC100158324 protein (Fragment) OS=Xenopus laevis GN=LOC100158324 PE=2 SV=1	923	0	1	0	0	1	0	0	0	0	0	0	0
tr|Q58M12|Q58M12_XENLA	29	C	0	3		DNA polymerase kappa OS=Xenopus laevis PE=2 SV=1	862	0	0	1	0	0	0	0	0	0	0	2	0
tr|Q6DFE4|Q6DFE4_XENLA	29		0	0	polk	Polk-prov protein OS=Xenopus laevis GN=polk PE=2 SV=1	862	0	0	1	0	0	0	0	0	0	0	2	0
sp|P02350|RS31_XENLA	30	C	0	9	rps3-a	40S ribosomal protein S3-A OS=Xenopus laevis GN=rps3-a PE=2 SV=2	246	0	2	2	2	0	0	1	0	0	1	0	1
sp|P47835|RS32_XENLA	30		0	0	rps3-b	40S ribosomal protein S3-B OS=Xenopus laevis GN=rps3-b PE=2 SV=1	246	0	1	2	1	0	0	1	0	0	0	0	0
tr|Q7ZYT3|Q7ZYT3_XENLA	30		0	0	rpls3-b	Rpls3-b protein OS=Xenopus laevis GN=rpls3-b PE=2 SV=1	246	0	2	2	2	0	0	1	0	0	1	0	1
tr|B1WBD4|B1WBD4_XENLA	31	C	8	0	LOC100158433	LOC100158433 protein (Fragment) OS=Xenopus laevis GN=LOC100158433 PE=2 SV=1	748	0	1	2	0	1	1	0	1	1	0	1	0
sp|Q9DE14|ATR_XENLA	32	C	186	49	atr	Serine/threonine-protein kinase atr OS=Xenopus laevis GN=atr PE=1 SV=2	2654	0	20	27	0	31	23	0	40	36	0	32	26
tr|Q6GQH7|Q6GQH7_XENLA	32		0	0		Uncharacterized protein (Fragment) OS=Xenopus laevis PE=2 SV=1	525	0	5	5	0	7	6	0	7	7	0	6	6
tr|Q6DJL9|Q6DJL9_XENLA	33	C	1	2	MGC82047	MGC82047 protein OS=Xenopus laevis GN=MGC82047 PE=2 SV=1	324	0	0	0	0	0	0	0	1	0	0	2	0
tr|Q0IH23|Q0IH23_XENLA	33	C	0	2	luc7l	Luc7l protein OS=Xenopus laevis GN=luc7l PE=2 SV=1	324	0	0	1	0	0	0	0	2	0	0	1	0
tr|Q7ZYI8|Q7ZYI8_XENLA	33		0	0	luc7l2	Cg7564-prov protein OS=Xenopus laevis GN=luc7l2 PE=2 SV=1	322	0	0	1	0	0	0	0	1	0	0	0	0
tr|A0A068EUV4|A0A068EUV4_XENLA	34	C	1	6	slx4	Structure specific endonuclease subunit SLX4 OS=Xenopus laevis GN=slx4 PE=2 SV=1	1777	0	0	1	0	1	0	0	2	3	0	0	0
tr|Q6INJ4|Q6INJ4_XENLA	34		0	0	LOC432277	LOC432277 protein (Fragment) OS=Xenopus laevis GN=LOC432277 PE=2 SV=1	1328	0	0	1	0	1	0	0	2	2	0	0	0
sp|Q6DFF4|INT9_XENLA	35	C	2	0	ints9	Integrator complex subunit 9 OS=Xenopus laevis GN=ints9 PE=2 SV=1	658	0	0	0	0	0	0	0	0	2	0	0	0
tr|Q6AXA7|Q6AXA7_XENLA	36	C	15	0	prpf6	MGC80263 protein OS=Xenopus laevis GN=prpf6 PE=2 SV=1	948	0	2	6	0	1	0	0	3	1	0	2	0
tr|Q5BL88|Q5BL88_XENLA	37	C	0	71	XORC1	XORC1 protein OS=Xenopus laevis GN=XORC1 PE=2 SV=1	886	0	12	17	0	8	11	0	7	8	0	5	3
tr|P70049|P70049_XENLA	37		0	0	orc1	Origin recognition complex protein 1 OS=Xenopus laevis GN=orc1 PE=2 SV=1	886	0	12	17	0	8	11	0	7	8	0	5	3
tr|B7ZRE7|B7ZRE7_XENLA	38	C	0	20	BRCA1	Breast and ovarian cancer susceptibility protein OS=Xenopus laevis GN=BRCA1 PE=2 SV=1	1579	0	1	2	0	2	1	0	6	4	0	4	0
tr|Q90X96|Q90X96_XENLA	38		0	0	brca1	Breast and ovarian cancer susceptibility protein OS=Xenopus laevis GN=brca1 PE=1 SV=1	1579	0	1	2	0	2	1	0	6	4	0	4	0
tr|Q5U5C4|Q5U5C4_XENLA	39	C	0	1	Pa2g4	Pa2g4 protein OS=Xenopus laevis GN=Pa2g4 PE=2 SV=1	390	0	0	0	0	0	0	1	0	0	0	0	0
tr|Q6GNV0|Q6GNV0_XENLA	39		0	0	pa2g4	MGC80858 protein OS=Xenopus laevis GN=pa2g4 PE=2 SV=1	390	0	0	0	0	0	0	1	0	0	0	0	0
tr|Q7ZXR5|Q7ZXR5_XENLA	39		0	0	Pa2g4	Pa2g4 protein (Fragment) OS=Xenopus laevis GN=Pa2g4 PE=2 SV=1	395	0	0	0	0	0	0	1	0	0	0	0	0
tr|Q498E8|Q498E8_XENLA	40	C	29	8	cul4b	MGC115611 protein OS=Xenopus laevis GN=cul4b PE=2 SV=1	858	0	4	6	0	4	2	0	7	6	0	4	4
tr|B1H1S6|B1H1S6_XENLA	40		0	0	LOC100158294	LOC100158294 protein (Fragment) OS=Xenopus laevis GN=LOC100158294 PE=2 SV=1	581	0	1	1	0	1	1	0	1	1	0	1	1
tr|Q7ZWX7|Q7ZWX7_XENLA	41	C	2	0	srsf3	Sfrs3-prov protein OS=Xenopus laevis GN=srsf3 PE=2 SV=1	191	0	0	1	0	0	0	0	1	0	0	0	0
tr|Q7ZYR1|Q7ZYR1_XENLA	42	C	4	7	rpl3	Rpl3-prov protein OS=Xenopus laevis GN=rpl3 PE=2 SV=1	403	0	2	2	0	1	1	0	2	2	0	1	0
tr|A2VD81|A2VD81_XENLA	42		0	0	LOC100037184	LOC100037184 protein OS=Xenopus laevis GN=LOC100037184 PE=2 SV=1	405	0	1	1	0	1	1	0	1	1	0	1	0
sp|Q6IP18|RFA2A_XENLA	43	C	35	0	rpa2-a	Replication protein A 32 kDa subunit-A OS=Xenopus laevis GN=rpa2-a PE=1 SV=1	276	0	9	9	0	9	7	0	10	10	0	11	6
sp|A1L2H9|RFA2B_XENLA	43	C	6	36	rpa2-b	Replication protein A 32 kDa subunit-B OS=Xenopus laevis GN=rpa2-b PE=2 SV=1	274	0	4	6	0	8	4	0	6	6	0	6	2
tr|Q7ZX79|Q7ZX79_XENLA	44	C	0	84	nono	p54nrb protein OS=Xenopus laevis GN=nono PE=2 SV=1	464	0	9	11	0	11	9	1	12	11	1	11	8
tr|Q2V0J2|Q2V0J2_XENLA	44		0	0	p54nrb	54 kD nuclear RNA-binding protein OS=Xenopus laevis GN=p54nrb PE=2 SV=1	463	0	9	11	0	11	9	1	12	11	1	11	8
sp|P10995|ACT2_XENLA	45	C	0	93	act2	Actin, alpha skeletal muscle 2 OS=Xenopus laevis GN=act2 PE=2 SV=1	377	5	8	10	8	9	8	4	10	7	3	12	9
sp|P20399|ACT2_XENTR	45		0	0		Actin, alpha cardiac muscle 2 OS=Xenopus tropicalis PE=2 SV=1	377	5	8	10	8	9	8	4	10	7	3	12	9
sp|P04752|ACT3_XENLA	45		0	0	act3	Actin, alpha skeletal muscle 3 OS=Xenopus laevis GN=act3 PE=2 SV=2	377	5	8	10	8	9	8	4	10	7	3	12	9
sp|Q6P8G3|ACT3_XENTR	45		0	0	act3	Actin, alpha sarcomeric/skeletal OS=Xenopus tropicalis GN=act3 PE=2 SV=1	377	5	8	10	8	9	8	4	10	7	3	12	9
sp|P53505|ACT5_XENLA	45	C	0	38		Actin, cytoplasmic type 5 OS=Xenopus laevis PE=3 SV=1	376	7	12	13	9	13	11	6	12	11	4	15	11
sp|P53506|ACT8_XENLA	45		0	0		Actin, cytoplasmic type 8 OS=Xenopus laevis PE=3 SV=1	376	7	12	13	9	13	11	6	12	11	4	15	11
sp|P15475|ACTB_XENBO	45		0	0	actb	Actin, cytoplasmic 1 OS=Xenopus borealis GN=actb PE=3 SV=1	376	7	12	13	9	13	11	6	12	11	4	15	11
sp|O93400|ACTB_XENLA	45		0	0	actb	Actin, cytoplasmic 1 OS=Xenopus laevis GN=actb PE=2 SV=1	375	7	12	13	9	13	11	6	12	11	4	15	11
sp|P04751|ACTC_XENLA	45		0	0	actc1	Actin, alpha cardiac muscle 1 OS=Xenopus laevis GN=actc1 PE=2 SV=1	377	5	8	10	8	9	8	4	10	7	3	12	9
sp|Q6P640|ACTC_XENTR	45		0	0	actc1	Actin, alpha cardiac muscle 1 OS=Xenopus tropicalis GN=actc1 PE=2 SV=1	377	5	8	10	8	9	8	4	10	7	3	12	9
sp|A2BDB0|ACTG_XENLA	45		0	0	actg1	Actin, cytoplasmic 2 OS=Xenopus laevis GN=actg1 PE=2 SV=1	375	7	12	13	9	13	11	6	12	11	4	15	11
tr|Q6NS10|Q6NS10_XENLA	45		0	0	acta2	MGC78870 protein OS=Xenopus laevis GN=acta2 PE=2 SV=1	377	5	8	8	8	9	8	4	8	7	3	11	9
tr|Q32NP0|Q32NP0_XENLA	45		0	0	actg1	MGC131002 protein OS=Xenopus laevis GN=actg1 PE=2 SV=1	376	7	12	13	9	13	11	6	12	11	4	15	11
tr|Q52QH5|Q52QH5_XENLA	45		0	0		Smooth muscle alpha actin OS=Xenopus laevis PE=2 SV=1	377	5	8	8	8	9	8	4	8	7	3	11	9
tr|A1L2N5|A1L2N5_XENLA	45	C	1	0	LOC100036902	LOC100036902 protein OS=Xenopus laevis GN=LOC100036902 PE=2 SV=1	377	6	7	8	8	8	8	5	10	9	3	11	8
tr|Q7ZWR7|Q7ZWR7_XENLA	45		0	0		MGC53823 protein OS=Xenopus laevis PE=2 SV=1	377	5	8	10	8	9	8	4	10	7	3	12	9
tr|Q7SYU4|Q7SYU4_XENLA	45		0	0	MGC64484	MGC64484 protein OS=Xenopus laevis GN=MGC64484 PE=2 SV=1	377	5	8	10	8	9	8	4	10	7	3	12	9
tr|Q6IP22|Q6IP22_XENLA	45		0	0	acta1	MGC79012 protein OS=Xenopus laevis GN=acta1 PE=2 SV=1	377	5	8	10	8	9	8	4	10	7	3	12	9
tr|Q5FWN5|Q5FWN5_XENLA	46	C	69	0	msh6	MGC85188 protein OS=Xenopus laevis GN=msh6 PE=2 SV=1	1340	0	0	4	0	2	2	0	20	19	0	13	9
tr|Q6AZL9|Q6AZL9_XENLA	47	C	5	0	rps23	MGC86316 protein OS=Xenopus laevis GN=rps23 PE=2 SV=1	143	0	0	1	0	2	0	0	1	1	0	0	0
tr|A8E601|A8E601_XENLA	48	C	29	0	LOC100126636	LOC100126636 protein (Fragment) OS=Xenopus laevis GN=LOC100126636 PE=2 SV=1	504	0	5	5	0	5	3	0	4	4	0	3	0
tr|Q6NU65|Q6NU65_XENLA	49	C	9	0	rnaseh1	Ribonuclease H1 OS=Xenopus laevis GN=rnaseh1 PE=2 SV=1	300	0	0	2	0	2	0	0	2	2	0	1	0
tr|Q6GP85|Q6GP85_XENLA	50	C	1	0	MGC80608	MGC80608 protein OS=Xenopus laevis GN=MGC80608 PE=2 SV=1	545	0	0	1	0	0	0	0	0	0	0	0	0
sp|P06897|H2A1_XENLA	51	C	0	23		Histone H2A type 1 OS=Xenopus laevis PE=1 SV=2	130	1	3	3	1	3	2	1	2	2	0	3	2
sp|P06898|H2A2_XENLA	51		0	0		Histone H2A type 2 OS=Xenopus laevis PE=3 SV=3	130	1	1	1	1	1	1	1	1	1	0	1	1
sp|Q6GM74|H2AV_XENLA	51	C	2	10	h2afv	Histone H2A.V OS=Xenopus laevis GN=h2afv PE=2 SV=3	128	1	3	2	2	2	2	2	2	2	0	2	3
sp|Q6GM86|H2AX_XENLA	51		0	0	h2afx	Histone H2AX OS=Xenopus laevis GN=h2afx PE=1 SV=3	139	1	3	3	1	3	2	1	2	2	0	3	2
sp|P70094|H2AZL_XENLA	51	C	0	7	h2a.zl1	Histone H2A.Z-like OS=Xenopus laevis GN=h2a.zl1 PE=2 SV=3	128	1	3	3	2	3	3	2	2	3	0	3	3
tr|Q6INC9|Q6INC9_XENLA	51		0	0	h2afj	Histone H2A OS=Xenopus laevis GN=h2afj PE=2 SV=1	126	1	2	2	2	2	2	2	2	2	0	2	2
tr|Q6AZS1|Q6AZS1_XENLA	51		0	0	hist1h2ad	Histone H2A OS=Xenopus laevis GN=hist1h2ad PE=2 SV=1	130	1	3	3	1	3	2	1	2	2	0	3	2
tr|Q6AZJ8|Q6AZJ8_XENLA	51		0	0	hist1h2aj	Histone H2A OS=Xenopus laevis GN=hist1h2aj PE=1 SV=1	130	1	3	3	1	3	2	1	2	2	0	3	2
tr|Q6PH89|Q6PH89_XENLA	51		0	0	hist1h2am	Histone H2A OS=Xenopus laevis GN=hist1h2am PE=2 SV=1	139	1	3	3	1	3	2	1	2	2	0	2	2
tr|Q6DKE3|Q6DKE3_XENLA	51	C	2	0	hist1h2aa	Histone H2A OS=Xenopus laevis GN=hist1h2aa PE=2 SV=1	139	1	3	3	1	3	2	1	2	3	0	3	2
tr|Q5HZZ9|Q5HZZ9_XENLA	51		0	0	LOC397949	Histone H2A OS=Xenopus laevis GN=LOC397949 PE=2 SV=1	105	1	3	3	2	3	3	2	2	3	0	3	3
tr|Q6NTQ1|Q6NTQ1_XENLA	52	C	34	0	MGC83104	MGC83104 protein OS=Xenopus laevis GN=MGC83104 PE=2 SV=1	797	0	3	5	0	4	4	0	5	5	0	6	2
tr|Q3B8I3|Q3B8I3_XENLA	53	C	5	0	rpl7	MGC130910 protein OS=Xenopus laevis GN=rpl7 PE=2 SV=1	246	0	2	1	0	1	1	0	0	0	0	0	0
tr|B1WBC3|B1WBC3_XENLA	54	C	5	9	hnrnpr	LOC100158425 protein OS=Xenopus laevis GN=hnrnpr PE=2 SV=1	511	0	2	3	0	3	0	0	0	3	1	1	1
tr|Q6NS22|Q6NS22_XENLA	54	C	1	0	syncrip	MGC78820 protein OS=Xenopus laevis GN=syncrip PE=2 SV=1	624	0	1	2	0	2	0	0	0	2	1	1	1
tr|Q7T184|Q7T184_XENLA	55	C	0	13	sall4	Zinc finger transcription factor SALL4 OS=Xenopus laevis GN=sall4 PE=2 SV=1	1061	0	0	4	0	4	1	0	3	0	0	1	0
tr|Q501Q2|Q501Q2_XENLA	55	C	0	1		Uncharacterized protein OS=Xenopus laevis PE=2 SV=1	698	0	0	2	0	2	1	0	2	0	0	2	0
tr|Q640I8|Q640I8_XENLA	55		0	0	SALL4	SALL4 protein OS=Xenopus laevis GN=SALL4 PE=2 SV=1	1061	0	0	4	0	4	1	0	3	0	0	1	0
tr|Q9PVN6|Q9PVN6_XENLA	55		0	0	Xsal-3	Xsal-3 short form OS=Xenopus laevis GN=Xsal-3 PE=4 SV=1	826	0	0	2	0	2	1	0	2	0	0	2	0
tr|Q9PVN7|Q9PVN7_XENLA	55		0	0	Xsal-3	Xsal-3 long form OS=Xenopus laevis GN=Xsal-3 PE=4 SV=1	1061	0	0	3	0	3	1	0	3	0	0	2	0
tr|Q91929|Q91929_XENLA	55		0	0	sall3	Zinc finger protein OS=Xenopus laevis GN=sall3 PE=2 SV=1	1350	0	0	1	0	1	0	0	1	0	0	0	0
tr|Q9PVN5|Q9PVN5_XENLA	55		0	0	Xsal-3'	Xsal-3' long form (Fragment) OS=Xenopus laevis GN=Xsal-3' PE=2 SV=1	549	0	0	2	0	2	0	0	2	0	0	0	0
tr|Q6PCL1|Q6PCL1_XENLA	55		0	0	sall1	MGC68418 protein OS=Xenopus laevis GN=sall1 PE=2 SV=1	1149	0	0	1	0	1	0	0	1	0	0	0	0
tr|Q5XH70|Q5XH70_XENLA	55		0	0	sall3	Sall3 protein OS=Xenopus laevis GN=sall3 PE=2 SV=1	1259	0	0	1	0	1	0	0	1	0	0	0	0
tr|Q9DDN5|Q9DDN5_XENLA	55		0	0	sall1	Spalt transcription factor Sall1 OS=Xenopus laevis GN=sall1 PE=2 SV=1	1377	0	0	1	0	1	0	0	1	0	0	0	0
sp|A2BD83|PAF1_XENLA	56	C	0	37	paf1	RNA polymerase II-associated factor 1 homolog OS=Xenopus laevis GN=paf1 PE=2 SV=1	524	0	4	7	0	5	3	0	4	3	0	8	3
tr|Q68F51|Q68F51_XENLA	56		0	0	paf1	Paf1 protein (Fragment) OS=Xenopus laevis GN=paf1 PE=2 SV=1	407	0	4	7	0	5	3	0	4	3	0	8	3
sp|Q9W6K1|MRE11_XENLA	57	C	63	0	mre11	Double-strand break repair protein MRE11 OS=Xenopus laevis GN=mre11 PE=2 SV=1	711	0	6	9	0	9	9	0	9	9	0	7	5
sp|Q7T0M6|AS1AB_XENLA	58	C	19	3	asf1ab	Histone chaperone asf1a-B OS=Xenopus laevis GN=asf1ab PE=2 SV=1	200	0	3	5	0	2	0	0	5	3	0	2	2
sp|Q69DB9|AS1AA_XENLA	58		0	0	asf1aa	Histone chaperone asf1a-A OS=Xenopus laevis GN=asf1aa PE=1 SV=1	201	0	1	1	0	0	0	0	1	0	0	0	0
tr|Q6INF9|Q6INF9_XENLA	59	C	37	0	gtf2h4	MGC83106 protein OS=Xenopus laevis GN=gtf2h4 PE=2 SV=1	455	0	5	5	0	4	4	0	4	5	0	6	4
sp|Q6GQL2|PP1B_XENLA	60		0	0	ppp1cb	Serine/threonine-protein phosphatase PP1-beta catalytic subunit OS=Xenopus laevis GN=ppp1cb PE=2 SV=1	327	0	1	0	0	1	0	0	0	0	0	0	0
sp|P36874|PP1GA_XENLA	60	C	0	4	ppp1cc-a	Serine/threonine-protein phosphatase PP1-gamma catalytic subunit A OS=Xenopus laevis GN=ppp1cc-a PE=1 SV=2	323	0	1	0	0	2	0	0	0	0	0	0	1
sp|Q7SZ10|PP1GB_XENLA	60		0	0	ppp1cc-b	Serine/threonine-protein phosphatase PP1-gamma catalytic subunit B OS=Xenopus laevis GN=ppp1cc-b PE=2 SV=1	323	0	1	0	0	2	0	0	0	0	0	0	1
tr|Q7ZTR3|Q7ZTR3_XENLA	60	C	1	0	ppp1ca	Serine/threonine-protein phosphatase OS=Xenopus laevis GN=ppp1ca PE=2 SV=1	326	0	1	0	0	2	0	0	0	0	0	0	1
tr|Q7SYR4|Q7SYR4_XENLA	61	C	0	1	LOC398642	LOC398642 protein (Fragment) OS=Xenopus laevis GN=LOC398642 PE=2 SV=1	527	0	0	0	0	0	0	1	0	0	0	0	0
tr|Q640C4|Q640C4_XENLA	61		0	0	LOC398642	LOC398642 protein (Fragment) OS=Xenopus laevis GN=LOC398642 PE=2 SV=1	517	0	0	0	0	0	0	1	0	0	0	0	0
tr|Q5MMR9|Q5MMR9_XENLA	62	C	0	152		Brg1 OS=Xenopus laevis PE=2 SV=1	1600	0	22	26	0	21	19	0	22	17	0	16	9
tr|Q4VQ79|Q4VQ79_XENLA	62		0	0	smarca4	Brg1 OS=Xenopus laevis GN=smarca4 PE=2 SV=1	1600	0	22	26	0	21	19	0	22	17	0	16	9
tr|Q4V873|Q4V873_XENLA	62		0	0		Uncharacterized protein (Fragment) OS=Xenopus laevis PE=2 SV=1	571	0	8	8	0	6	6	0	6	6	0	7	4
tr|Q3B8L3|Q3B8L3_XENLA	62		0	0		Uncharacterized protein (Fragment) OS=Xenopus laevis PE=2 SV=1	571	0	8	8	0	6	6	0	6	6	0	7	4
tr|Q5XHK1|Q5XHK1_XENLA	62		0	0		Uncharacterized protein (Fragment) OS=Xenopus laevis PE=2 SV=1	571	0	8	8	0	6	6	0	6	6	0	7	4
tr|Q71R48|Q71R48_XENLA	62		0	0	BRM	BRM protein (Fragment) OS=Xenopus laevis GN=BRM PE=2 SV=1	309	0	2	2	0	2	2	0	2	2	0	2	2
tr|Q0IH52|Q0IH52_XENLA	62		0	0	LOC432089	LOC432089 protein (Fragment) OS=Xenopus laevis GN=LOC432089 PE=2 SV=1	565	0	2	2	0	1	2	0	2	2	0	2	2
tr|Q6IR72|Q6IR72_XENLA	62		0	0	LOC432089	LOC432089 protein (Fragment) OS=Xenopus laevis GN=LOC432089 PE=2 SV=1	566	0	2	2	0	1	2	0	2	2	0	2	2
tr|Q4VT50|Q4VT50_XENLA	63	C	196	0	fancd2	Fanconi anemia complementation group D2 OS=Xenopus laevis GN=fancd2 PE=2 SV=1	1443	0	19	22	0	26	25	0	30	26	0	27	21
sp|Q6NUF4|TPX2A_XENLA	64	C	36	8	tpx2-a	Targeting protein for Xklp2-A OS=Xenopus laevis GN=tpx2-a PE=1 SV=1	716	0	8	10	0	5	4	0	6	4	0	3	4
sp|Q6DDV8|TPX2B_XENLA	64	C	27	0	tpx2-b	Targeting protein for Xklp2-B OS=Xenopus laevis GN=tpx2-b PE=2 SV=1	715	0	5	5	0	7	4	0	6	4	0	3	1
sp|P13602|TBB2_XENLA	65		0	0	tubb2	Tubulin beta-2 chain OS=Xenopus laevis GN=tubb2 PE=2 SV=1	443	0	0	0	1	2	3	1	3	1	0	1	2
sp|Q91575|TBB5_XENLA	65	C	12	4	tubb	Tubulin beta chain OS=Xenopus laevis GN=tubb PE=2 SV=1	444	1	1	1	2	3	4	2	4	2	1	2	3
tr|Q8AVU1|Q8AVU1_XENLA	65		0	0	tubb6	MGC52834 protein OS=Xenopus laevis GN=tubb6 PE=2 SV=1	446	0	0	0	1	2	2	1	2	1	0	0	1
tr|Q5U5A4|Q5U5A4_XENLA	65		0	0	tubb3	LOC495319 protein OS=Xenopus laevis GN=tubb3 PE=2 SV=1	449	0	0	0	1	2	2	1	2	1	0	0	1
tr|A8E5X7|A8E5X7_XENLA	65		0	0	LOC100037222	LOC100037222 protein (Fragment) OS=Xenopus laevis GN=LOC100037222 PE=2 SV=1	444	0	0	0	1	1	1	0	1	0	0	0	0
tr|A2VDD0|A2VDD0_XENLA	65		0	0	LOC100037222	LOC100037222 protein (Fragment) OS=Xenopus laevis GN=LOC100037222 PE=2 SV=1	433	0	0	0	1	1	1	0	1	0	0	0	0
sp|P30883|TBB4_XENLA	65	C	0	13	tubb4	Tubulin beta-4 chain OS=Xenopus laevis GN=tubb4 PE=2 SV=1	445	0	0	1	0	1	2	2	2	1	0	2	2
tr|Q66KS4|Q66KS4_XENLA	65		0	0	LOC446922	LOC446922 protein (Fragment) OS=Xenopus laevis GN=LOC446922 PE=2 SV=1	448	0	0	1	0	1	1	1	1	1	0	1	1
tr|Q7ZWP4|Q7ZWP4_XENLA	65		0	0	tubb4a	MGC53205 protein OS=Xenopus laevis GN=tubb4a PE=2 SV=1	444	0	0	1	0	1	1	1	1	1	0	1	1
tr|Q4KLE9|Q4KLE9_XENLA	65		0	0	LOC446922	LOC446922 protein OS=Xenopus laevis GN=LOC446922 PE=2 SV=1	446	0	0	1	0	1	1	1	1	1	0	1	1
tr|Q7ZY50|Q7ZY50_XENLA	65		0	0		MGC53997 protein OS=Xenopus laevis PE=2 SV=1	445	0	0	1	0	1	2	2	2	1	0	2	2
tr|Q7T0Q9|Q7T0Q9_XENLA	65		0	0		MGC69074 protein OS=Xenopus laevis PE=2 SV=1	445	0	0	0	0	1	1	1	1	1	0	0	1
tr|Q6AZR7|Q6AZR7_XENLA	66	C	0	2	psma6	Proteasome subunit alpha type OS=Xenopus laevis GN=psma6 PE=2 SV=1	246	0	0	0	0	0	0	0	0	1	0	1	0
tr|Q5XGL4|Q5XGL4_XENLA	66		0	0	LOC495277	Proteasome subunit alpha type OS=Xenopus laevis GN=LOC495277 PE=2 SV=1	246	0	0	0	0	0	0	0	0	1	0	1	0
tr|Q6GPC0|Q6GPC0_XENLA	67	C	32	0	top3a	DNA topoisomerase OS=Xenopus laevis GN=top3a PE=2 SV=1	1022	0	2	4	0	4	6	0	4	7	0	2	3
tr|Q76LD2|Q76LD2_XENLA	68	C	41	0	rfc4	RFC2 protein OS=Xenopus laevis GN=rfc4 PE=2 SV=1	363	0	5	7	0	5	3	0	6	6	0	6	3
tr|Q66L23|Q66L23_XENLA	69	C	12	0	rpl24	MGC85232 protein OS=Xenopus laevis GN=rpl24 PE=2 SV=1	139	0	3	2	0	2	1	0	2	1	0	1	0
sp|P41116|RL8_XENLA	70	C	16	0	rpl8	60S ribosomal protein L8 OS=Xenopus laevis GN=rpl8 PE=2 SV=3	257	0	2	1	0	3	2	1	2	1	0	2	2
tr|Q6GQG6|Q6GQG6_XENLA	71	C	17	0	npm2	Npm-A protein OS=Xenopus laevis GN=npm2 PE=1 SV=1	200	1	2	2	0	2	2	0	1	1	0	3	3
tr|Q6NUC7|Q6NUC7_XENLA	72	C	16	0		Uncharacterized protein OS=Xenopus laevis PE=2 SV=1	196	0	2	3	0	2	0	0	2	3	0	2	2
tr|Q6DCS0|Q6DCS0_XENLA	73	C	0	1	cct7	Cct7-prov protein OS=Xenopus laevis GN=cct7 PE=2 SV=1	542	0	0	0	0	1	0	0	0	0	0	0	0
tr|Q7ZYP8|Q7ZYP8_XENLA	73		0	0	LOC495278	LOC495278 protein (Fragment) OS=Xenopus laevis GN=LOC495278 PE=2 SV=1	561	0	0	0	0	1	0	0	0	0	0	0	0
tr|A1L3L2|A1L3L2_XENLA	73		0	0		Uncharacterized protein (Fragment) OS=Xenopus laevis PE=2 SV=1	148	0	0	0	0	1	0	0	0	0	0	0	0
tr|Q7ZXA9|Q7ZXA9_XENLA	73		0	0	cct7-prov	Cct7-prov protein (Fragment) OS=Xenopus laevis GN=cct7-prov PE=2 SV=1	554	0	0	0	0	1	0	0	0	0	0	0	0
tr|Q5XGK8|Q5XGK8_XENLA	73		0	0	LOC495278	LOC495278 protein OS=Xenopus laevis GN=LOC495278 PE=2 SV=1	480	0	0	0	0	1	0	0	0	0	0	0	0
tr|Q6DD16|Q6DD16_XENLA	74	C	7	23	rbm39	Rnpc2-prov protein OS=Xenopus laevis GN=rbm39 PE=2 SV=1	540	0	2	4	0	2	2	0	5	5	0	6	4
tr|Q6DJM9|Q6DJM9_XENLA	74		0	0	MGC81970	MGC81970 protein OS=Xenopus laevis GN=MGC81970 PE=2 SV=1	512	0	2	3	0	1	1	0	4	4	0	5	3
tr|Q6GPU5|Q6GPU5_XENLA	75	C	35	0	MGC82602	MGC82602 protein OS=Xenopus laevis GN=MGC82602 PE=2 SV=1	142	0	2	6	2	4	3	2	4	4	1	4	3
tr|Q66J65|Q66J65_XENLA	76	C	19	0	prpf4	MGC81780 protein OS=Xenopus laevis GN=prpf4 PE=2 SV=1	483	0	3	3	0	4	1	0	3	4	0	1	0
tr|Q6PA38|Q6PA38_XENLA	77	C	3	0	polr2e	MGC68604 protein OS=Xenopus laevis GN=polr2e PE=2 SV=1	210	0	0	1	0	0	0	0	1	0	0	1	0
tr|Q5XGV6|Q5XGV6_XENLA	78	C	29	0	trim24	LOC495130 protein OS=Xenopus laevis GN=trim24 PE=2 SV=1	439	0	5	4	0	4	2	0	5	5	0	2	2
tr|A6YGN3|A6YGN3_XENLA	79	C	0	39	FANCG	Fanconi anemia complementation group G variant 2 OS=Xenopus laevis GN=FANCG PE=2 SV=1	591	0	3	5	0	4	3	0	7	8	0	5	4
tr|A6Y874|A6Y874_XENLA	79		0	0	fancg	Fanconi anemia complementation group G OS=Xenopus laevis GN=fancg PE=2 SV=1	640	0	3	5	0	4	3	0	7	8	0	5	4
tr|Q4VT51|Q4VT51_XENLA	80	C	62	0	fanca	Fanconi anemia complementation group A OS=Xenopus laevis GN=fanca PE=2 SV=1	1422	0	5	8	0	10	8	0	8	9	0	9	5
tr|Q08AX4|Q08AX4_XENLA	81	C	5	8	LOC100158394	LOC100158394 protein OS=Xenopus laevis GN=LOC100158394 PE=2 SV=1	555	0	2	0	0	3	3	0	2	1	0	2	0
tr|Q9PUM7|Q9PUM7_XENLA	81		0	0	gatad2a	Mi-2 histone deacetylase complex protein 66 OS=Xenopus laevis GN=gatad2a PE=2 SV=1	420	0	1	0	0	2	2	0	1	1	0	1	0
tr|B7ZQE1|B7ZQE1_XENLA	81		0	0	LOC398154	Mi-2 histone deacetylase complex protein 66 OS=Xenopus laevis GN=LOC398154 PE=2 SV=1	420	0	1	0	0	2	2	0	1	1	0	1	0
tr|Q32NN1|Q32NN1_XENLA	82	C	74	0	recql	MGC131022 protein OS=Xenopus laevis GN=recql PE=2 SV=1	652	0	10	12	0	10	8	0	11	9	0	10	5
sp|Q9DEY9|BLM_XENLA	82	C	56	1	blm	Bloom syndrome protein homolog OS=Xenopus laevis GN=blm PE=2 SV=1	1364	0	6	7	0	6	8	0	9	8	0	8	5
tr|Q6PGT2|Q6PGT2_XENLA	83	C	0	4	amy2b	Alpha-amylase OS=Xenopus laevis GN=amy2b PE=2 SV=1	511	0	0	0	0	0	0	0	0	2	0	1	1
tr|Q8QGF5|Q8QGF5_XENLA	83		0	0		Alpha-amylase (Fragment) OS=Xenopus laevis PE=2 SV=1	327	0	0	0	0	0	0	0	0	2	0	1	1
tr|Q6GQ59|Q6GQ59_XENLA	84	C	16	23	MGC80325	MGC80325 protein OS=Xenopus laevis GN=MGC80325 PE=2 SV=1	335	0	4	6	0	4	4	0	6	6	0	6	3
tr|Q7ZTM5|Q7ZTM5_XENLA	84	C	7	0	rfc5	Rfc5-prov protein OS=Xenopus laevis GN=rfc5 PE=2 SV=1	335	0	3	5	0	3	3	0	6	4	0	4	2
tr|I6N3H5|I6N3H5_XENLA	85	C	32	0	Rif1	Rif1 protein OS=Xenopus laevis GN=Rif1 PE=2 SV=1	2327	0	2	6	0	4	2	0	7	4	0	5	2
tr|Q5EAT1|Q5EAT1_XENLA	86	C	3	0	pcca	Pcca protein OS=Xenopus laevis GN=pcca PE=2 SV=1	710	0	0	1	1	0	0	1	0	0	0	0	0
tr|Q7ZZU5|Q7ZZU5_XENLA	87	C	12	0	rad9a	PCNA-like DNA checkpoint protein Rad9 OS=Xenopus laevis GN=rad9a PE=2 SV=1	377	0	0	0	0	0	2	0	2	2	0	4	2
tr|Q4V867|Q4V867_XENLA	88	C	13	0	orc5	MGC114641 protein OS=Xenopus laevis GN=orc5 PE=2 SV=1	448	0	3	4	0	3	0	0	1	1	0	0	1
sp|P02281|H2B11_XENLA	89	C	0	25		Histone H2B 1.1 OS=Xenopus laevis PE=1 SV=2	126	0	2	4	0	4	3	1	2	5	0	2	2
tr|Q92130|Q92130_XENLA	89		0	0	H2B	Histone H2B OS=Xenopus laevis GN=H2B PE=3 SV=1	126	0	2	4	0	4	3	1	2	5	0	2	2
tr|Q92131|Q92131_XENLA	89		0	0	H2B	Histone H2B OS=Xenopus laevis GN=H2B PE=3 SV=1	126	0	0	3	0	2	2	0	0	3	0	1	1
sp|P06900|H2B12_XENLA	89		0	0		Histone H2B 1.2 OS=Xenopus laevis PE=1 SV=2	126	0	2	3	0	4	2	1	2	5	0	2	2
sp|Q91918|RA51A_XENLA	90	C	11	18	rad51-a	DNA repair protein RAD51 homolog A OS=Xenopus laevis GN=rad51-a PE=2 SV=1	336	0	3	5	0	5	2	0	4	3	0	5	2
sp|Q91917|RA51B_XENLA	90		0	0	rad51-b	DNA repair protein RAD51 homolog B OS=Xenopus laevis GN=rad51-b PE=2 SV=1	336	0	1	4	0	3	1	0	2	2	0	3	2
sp|O13024|INCEA_XENLA	91	C	12	4	incenp-a	Inner centromere protein A OS=Xenopus laevis GN=incenp-a PE=1 SV=1	873	0	3	4	0	2	0	0	4	1	0	0	2
sp|Q32N93|INCEB_XENLA	91	C	5	13	incenp-b	Inner centromere protein B OS=Xenopus laevis GN=incenp-b PE=2 SV=1	892	0	2	4	0	3	2	0	4	3	0	2	2
tr|Q6GME0|Q6GME0_XENLA	91		0	0	LOC398822	LOC398822 protein (Fragment) OS=Xenopus laevis GN=LOC398822 PE=2 SV=1	540	0	1	3	0	3	1	0	3	2	0	2	2
tr|Q498L5|Q498L5_XENLA	91		0	0	LOC398822	LOC398822 protein (Fragment) OS=Xenopus laevis GN=LOC398822 PE=2 SV=1	606	0	1	3	0	3	1	0	3	2	0	2	2
tr|Q6PAZ7|Q6PAZ7_XENLA	91		0	0	LOC398822	LOC398822 protein (Fragment) OS=Xenopus laevis GN=LOC398822 PE=2 SV=1	613	0	1	3	0	3	1	0	3	2	0	2	2
sp|Q805A1|SMC5_XENLA	92	C	39	0	smc5	Structural maintenance of chromosomes protein 5 OS=Xenopus laevis GN=smc5 PE=2 SV=1	1065	0	0	2	0	4	4	0	8	8	0	9	4
tr|Q6DFM0|Q6DFM0_XENLA	93	C	10	54	smarca5	ISWI protein OS=Xenopus laevis GN=smarca5 PE=1 SV=1	1046	0	7	15	0	13	4	0	7	8	0	5	5
tr|Q9DF71|Q9DF71_XENLA	93	C	7	0	ISWI	Imitation switch ISWI OS=Xenopus laevis GN=ISWI PE=2 SV=1	1046	0	7	14	0	13	3	0	7	8	0	5	4
sp|P29054|TF2B_XENLA	94	C	0	1	gtf2b	Transcription initiation factor IIB OS=Xenopus laevis GN=gtf2b PE=2 SV=1	316	0	0	1	0	0	0	0	0	0	0	0	0
tr|Q63ZH4|Q63ZH4_XENLA	94		0	0	gtf2b	LOC494830 protein OS=Xenopus laevis GN=gtf2b PE=2 SV=1	316	0	0	1	0	0	0	0	0	0	0	0	0
sp|Q66KH9|CDK8_XENLA	95	C	0	15	cdk8	Cyclin-dependent kinase 8 OS=Xenopus laevis GN=cdk8 PE=2 SV=1	416	0	4	3	0	3	0	0	1	1	0	2	1
tr|Q7T0R3|Q7T0R3_XENLA	95		0	0	cdk19	Cdk-8-prov protein OS=Xenopus laevis GN=cdk19 PE=2 SV=1	486	0	4	3	0	3	0	0	1	1	0	2	1
tr|Q66JB0|Q66JB0_XENLA	96	C	0	15	ddx17	LOC398649 protein OS=Xenopus laevis GN=ddx17 PE=2 SV=1	610	0	2	3	1	3	0	0	1	1	0	3	1
tr|Q7SYW9|Q7SYW9_XENLA	96		0	0	LOC398649	LOC398649 protein (Fragment) OS=Xenopus laevis GN=LOC398649 PE=2 SV=1	415	0	2	3	1	3	0	0	1	1	0	3	1
tr|Q801P9|Q801P9_XENLA	96	C	11	75		MGC53795 protein OS=Xenopus laevis PE=2 SV=1	607	0	13	12	0	14	11	0	12	11	0	13	11
tr|Q63ZR1|Q63ZR1_XENLA	96	C	0	9	DDX5	DDX5 protein OS=Xenopus laevis GN=DDX5 PE=2 SV=1	608	0	13	14	0	13	10	0	13	11	0	12	11
tr|Q9I8S3|Q9I8S3_XENLA	96		0	0	ddx5	P68 RNA helicase OS=Xenopus laevis GN=ddx5 PE=2 SV=1	608	0	12	13	0	12	9	0	12	11	0	11	10
sp|P24346|DDX3_XENLA	96		0	0	an3	Putative ATP-dependent RNA helicase an3 OS=Xenopus laevis GN=an3 PE=2 SV=1	697	0	1	1	0	2	0	0	1	1	0	1	1
tr|Q52L23|Q52L23_XENLA	96		0	0		Uncharacterized protein OS=Xenopus laevis PE=2 SV=1	695	0	1	1	0	2	0	0	1	1	0	1	1
tr|Q7ZXJ0|Q7ZXJ0_XENLA	96		0	0	ddx3x	Pl10-prov protein OS=Xenopus laevis GN=ddx3x PE=2 SV=1	697	0	1	1	0	2	0	0	1	1	0	1	1
sp|P02385|RL4B_XENLA	97	C	0	5	rpl4-b	60S ribosomal protein L4-B OS=Xenopus laevis GN=rpl4-b PE=2 SV=2	401	0	1	2	0	1	0	0	1	0	0	0	0
sp|P08429|RL4A_XENLA	97		0	0	rpl4-a	60S ribosomal protein L4-A OS=Xenopus laevis GN=rpl4-a PE=2 SV=2	396	0	1	2	0	1	0	0	1	0	0	0	0
tr|Q7SY96|Q7SY96_XENLA	97		0	0	rpl4	Rpl4-b protein OS=Xenopus laevis GN=rpl4 PE=2 SV=1	401	0	1	2	0	1	0	0	1	0	0	0	0
sp|P14117|RL4_XENTR	97		0	0	rpl4	60S ribosomal protein L4 (Fragment) OS=Xenopus tropicalis GN=rpl4 PE=3 SV=1	96	0	0	0	0	1	0	0	0	0	0	0	0
tr|Q7ZXQ2|Q7ZXQ2_XENLA	98	C	2	7	fus	Fus protein OS=Xenopus laevis GN=fus PE=2 SV=1	536	0	3	3	1	2	2	0	2	2	0	2	0
tr|Q6DKB4|Q6DKB4_XENLA	98		0	0	MGC84691	MGC84691 protein OS=Xenopus laevis GN=MGC84691 PE=2 SV=1	536	0	2	2	1	2	2	0	2	2	0	2	0
tr|Q66J39|Q66J39_XENLA	98		0	0	taf15	MGC82028 protein OS=Xenopus laevis GN=taf15 PE=2 SV=1	475	0	1	1	1	1	1	0	1	1	0	1	0
tr|Q6DCR4|Q6DCR4_XENLA	98	C	1	8	MGC80893	MGC80893 protein OS=Xenopus laevis GN=MGC80893 PE=2 SV=1	482	0	1	2	1	1	1	0	1	1	0	1	0
sp|Q52KV5|LEO1_XENLA	99	C	18	0	leo1	RNA polymerase-associated protein LEO1 OS=Xenopus laevis GN=leo1 PE=2 SV=1	703	0	2	2	0	4	0	0	3	4	0	2	1
tr|Q640G9|Q640G9_XENLA	100	C	164	0	hcfc1	LOC494675 protein OS=Xenopus laevis GN=hcfc1 PE=2 SV=1	2101	0	21	29	0	26	16	0	21	22	0	17	12
tr|A1L3F9|A1L3F9_XENLA	101	C	0	21	LOC100036995	LOC100036995 protein (Fragment) OS=Xenopus laevis GN=LOC100036995 PE=2 SV=1	583	0	2	3	0	3	2	0	5	3	0	2	1
tr|B1H1N6|B1H1N6_XENLA	101		0	0	LOC100036995	LOC100036995 protein (Fragment) OS=Xenopus laevis GN=LOC100036995 PE=2 SV=1	587	0	2	3	0	3	2	0	5	3	0	2	1
sp|Q52KW8|RCC2_XENLA	102	C	15	75	rcc2	Protein RCC2 homolog OS=Xenopus laevis GN=rcc2 PE=2 SV=1	513	0	10	12	0	12	12	1	12	11	0	12	8
tr|B9VQ38|B9VQ38_XENLA	102		0	0		Telophase disc 60 kDa protein (Fragment) OS=Xenopus laevis PE=2 SV=1	497	0	8	10	0	9	10	1	10	10	0	11	6
tr|Q6NRQ4|Q6NRQ4_XENLA	103	C	18	26	LOC431977	LOC431977 protein (Fragment) OS=Xenopus laevis GN=LOC431977 PE=2 SV=1	1078	0	5	7	0	6	4	0	7	7	0	6	2
tr|B1H1P5|B1H1P5_XENLA	103	C	9	0	LOC100158273	LOC100158273 protein (Fragment) OS=Xenopus laevis GN=LOC100158273 PE=2 SV=1	1115	0	4	4	0	7	4	0	6	5	0	4	1
sp|Q91636|KIF2C_XENLA	104	C	97	3	kif2c	Kinesin-like protein KIF2C OS=Xenopus laevis GN=kif2c PE=1 SV=2	730	0	13	13	0	13	12	0	13	14	0	11	11
sp|Q91637|KIF2A_XENLA	104		0	0	kif2a	Kinesin-like protein KIF2A OS=Xenopus laevis GN=kif2a PE=1 SV=2	682	0	0	0	0	0	1	0	0	1	0	1	0
tr|Q6GPC7|Q6GPC7_XENLA	104		0	0	MGC80500	Kinesin-like protein OS=Xenopus laevis GN=MGC80500 PE=2 SV=1	662	0	0	0	0	0	1	0	0	1	0	1	0
tr|Q6PF78|Q6PF78_XENLA	104		0	0	kif2-A-prov	Kinesin-like protein OS=Xenopus laevis GN=kif2-A-prov PE=2 SV=1	686	0	0	0	0	0	1	0	0	1	0	1	0
tr|Q6DCG2|Q6DCG2_XENLA	105	C	1	0	HBXAP	HBXAP protein (Fragment) OS=Xenopus laevis GN=HBXAP PE=2 SV=1	589	0	0	1	0	0	0	0	0	0	0	0	0
tr|Q6AZH8|Q6AZH8_XENLA	106	C	3	0	hspa1a	Uncharacterized protein OS=Xenopus laevis GN=hspa1a PE=2 SV=1	652	6	12	13	10	11	13	10	13	12	6	11	9
sp|P02827|HSP70_XENLA	106	C	0	62		Heat shock 70 kDa protein OS=Xenopus laevis PE=2 SV=1	647	6	7	5	6	5	6	6	5	3	5	5	3
tr|Q6DCD3|Q6DCD3_XENLA	106		0	0	hsp70	Hsp70 protein OS=Xenopus laevis GN=hsp70 PE=2 SV=1	647	6	7	5	6	5	6	6	5	3	5	5	3
tr|A1L3K5|A1L3K5_XENLA	106	C	3	0	hspa1b	LOC100037033 protein OS=Xenopus laevis GN=hspa1b PE=2 SV=1	646	6	18	18	13	15	19	11	18	19	7	18	16
tr|Q91993|Q91993_XENLA	106		0	0	hsc70.II	Heat shock cognate 70.II OS=Xenopus laevis GN=hsc70.II PE=2 SV=1	647	6	21	25	12	18	24	11	23	24	7	20	17
tr|Q8AVE2|Q8AVE2_XENLA	106	C	3	150	hspa1l	Hsc70 protein OS=Xenopus laevis GN=hspa1l PE=2 SV=1	650	6	19	23	13	17	23	11	22	23	7	19	17
tr|Q7ZTK6|Q7ZTK6_XENLA	106	C	6	16	hspa8	MGC53952 protein OS=Xenopus laevis GN=hspa8 PE=2 SV=1	646	6	21	26	13	20	26	11	24	25	7	21	19
tr|Q91624|Q91624_XENLA	106		0	0	hsc70.I	Heat shock cognate 70.I OS=Xenopus laevis GN=hsc70.I PE=2 SV=1	645	4	15	16	9	13	16	9	17	17	5	14	13
tr|Q6GMF1|Q6GMF1_XENLA	106		0	0	hspa2	MGC81782 protein OS=Xenopus laevis GN=hspa2 PE=2 SV=1	634	5	7	6	6	6	7	5	6	4	4	6	4
sp|Q91883|GRP78_XENLA	106		0	0	hspa5	78 kDa glucose-regulated protein OS=Xenopus laevis GN=hspa5 PE=2 SV=1	658	2	4	8	2	5	5	3	6	4	2	6	4
tr|Q8AVE3|Q8AVE3_XENLA	106	C	1	18	hspa5	Hspa5 protein OS=Xenopus laevis GN=hspa5 PE=2 SV=1	655	2	4	9	2	5	5	3	6	4	2	6	4
tr|Q6DD68|Q6DD68_XENLA	106		0	0	LOC397850	LOC397850 protein OS=Xenopus laevis GN=LOC397850 PE=2 SV=1	658	2	4	8	2	5	5	3	6	4	2	6	4
tr|Q91688|Q91688_XENLA	106		0	0	BiP/Grp78	Immunoglobulin binding protein OS=Xenopus laevis GN=BiP/Grp78 PE=2 SV=1	658	2	4	6	2	4	5	3	5	4	2	5	4
tr|Q3B8M5|Q3B8M5_XENLA	107		0	0	XNop56	XNop56 protein OS=Xenopus laevis GN=XNop56 PE=2 SV=1	529	3	13	16	6	10	9	8	11	12	4	12	10
tr|Q4V7X3|Q4V7X3_XENLA	107	C	0	122	XNop56	XNop56 protein (Fragment) OS=Xenopus laevis GN=XNop56 PE=2 SV=1	510	3	15	18	6	11	9	8	12	13	4	13	10
tr|Q90W60|Q90W60_XENLA	107		0	0	nop56	XNop56 protein OS=Xenopus laevis GN=nop56 PE=2 SV=1	532	3	15	18	6	11	9	8	12	13	4	13	10
tr|Q66J06|Q66J06_XENLA	108	C	7	0	dcun1d5	DCN1-like protein OS=Xenopus laevis GN=dcun1d5 PE=2 SV=1	232	0	1	1	0	0	1	0	1	1	0	1	1
sp|Q6INH5|SRRTB_XENLA	109	C	9	0	srrt-b	Serrate RNA effector molecule homolog B OS=Xenopus laevis GN=srrt-b PE=2 SV=1	844	0	2	4	0	1	0	0	1	1	0	0	0
sp|Q9DE26|RUVB1_XENLA	110	C	0	61	ruvbl1	RuvB-like 1 OS=Xenopus laevis GN=ruvbl1 PE=2 SV=1	456	0	8	12	0	8	6	0	8	8	0	7	4
tr|Q6GR29|Q6GR29_XENLA	110		0	0	ruvbl1	Ruvbl1 protein OS=Xenopus laevis GN=ruvbl1 PE=2 SV=1	456	0	8	12	0	8	6	0	8	8	0	7	4
tr|Q5IJ72|Q5IJ72_XENLA	111	C	0	2	runx1t1	MTG8 OS=Xenopus laevis GN=runx1t1 PE=2 SV=1	582	0	0	0	0	1	0	0	0	0	0	1	0
tr|Q5IJ71|Q5IJ71_XENLA	111		0	0	cbfa2t3	MTG16b OS=Xenopus laevis GN=cbfa2t3 PE=2 SV=1	555	0	0	0	0	1	0	0	0	0	0	1	0
tr|Q5IJ70|Q5IJ70_XENLA	111		0	0	MTG16	MTG16b OS=Xenopus laevis GN=MTG16 PE=2 SV=1	555	0	0	0	0	1	0	0	0	0	0	1	0
sp|Q6GQ82|SNF5_XENLA	112	C	2	33	smarcb1	SWI/SNF-related matrix-associated actin-dependent regulator of chromatin subfamily B member 1 OS=Xenopus laevis GN=smarcb1 PE=2 SV=1	378	0	6	6	0	4	4	0	5	5	0	3	2
tr|Q3KPK3|Q3KPK3_XENLA	112		0	0		Uncharacterized protein OS=Xenopus laevis PE=2 SV=1	376	0	5	5	0	4	4	0	5	5	0	3	2
tr|Q5HZF7|Q5HZF7_XENLA	113	C	18	0	MSH2	MSH2 protein (Fragment) OS=Xenopus laevis GN=MSH2 PE=2 SV=1	676	0	0	0	0	0	0	0	6	6	0	4	2
sp|Q6NRW0|MTBP_XENLA	114	C	16	0	mtbp	Mdm2-binding protein OS=Xenopus laevis GN=mtbp PE=2 SV=1	860	0	2	4	0	1	1	0	3	3	0	2	0
tr|D5MDW0|D5MDW0_XENLA	115	C	64	0	fancm	Fanconi anemia protein OS=Xenopus laevis GN=fancm PE=2 SV=1	2166	0	4	7	0	8	6	0	16	12	0	7	4
tr|Q68F48|Q68F48_XENLA	116		0	0	LOC446279	LOC446279 protein (Fragment) OS=Xenopus laevis GN=LOC446279 PE=2 SV=1	479	0	12	17	0	11	8	0	11	11	0	10	9
tr|Q2KHQ3|Q2KHQ3_XENLA	116	C	15	89	daxx	LOC446279 protein OS=Xenopus laevis GN=daxx PE=2 SV=1	916	0	14	20	0	12	10	0	14	12	0	11	11
sp|Q9W602|SSRP1_XENLA	117	C	119	38	ssrp1	FACT complex subunit SSRP1 OS=Xenopus laevis GN=ssrp1 PE=1 SV=1	693	2	16	21	3	21	15	4	17	20	3	20	15
tr|Q4KLX2|Q4KLX2_XENLA	117		0	0	raph1	MGC114656 protein OS=Xenopus laevis GN=raph1 PE=2 SV=1	365	0	5	6	0	5	4	0	5	5	0	5	3
tr|Q6NRJ3|Q6NRJ3_XENLA	118	C	38	0	exosc10	MGC83774 protein OS=Xenopus laevis GN=exosc10 PE=2 SV=1	883	0	3	10	0	7	2	0	4	6	0	3	3
sp|Q01588|RFA1_XENLA	119	C	15	116	rpa1	Replication protein A 70 kDa DNA-binding subunit OS=Xenopus laevis GN=rpa1 PE=1 SV=1	609	0	15	16	0	17	18	0	16	18	0	16	15
tr|Q6NRZ5|Q6NRZ5_XENLA	119	C	2	0	LOC397937	LOC397937 protein OS=Xenopus laevis GN=LOC397937 PE=2 SV=1	607	0	12	14	0	15	16	0	15	17	0	15	14
tr|Q5XH69|Q5XH69_XENLA	120	C	1	0	LOC495053	LOC495053 protein (Fragment) OS=Xenopus laevis GN=LOC495053 PE=2 SV=1	1315	0	0	1	0	0	0	0	0	0	0	0	0
tr|Q6GR42|Q6GR42_XENLA	121	C	18	0	gtf2h2	MGC81060 protein OS=Xenopus laevis GN=gtf2h2 PE=2 SV=1	395	0	2	2	0	4	1	0	3	1	0	3	2
tr|Q5U510|Q5U510_XENLA	122	C	35	13	rpa3	LOC495401 protein OS=Xenopus laevis GN=rpa3 PE=2 SV=1	121	0	6	4	0	6	3	0	6	8	0	8	7
tr|Q6AZP5|Q6AZP5_XENLA	122		0	0	rpa3-prov	Rpa3-prov protein OS=Xenopus laevis GN=rpa3-prov PE=2 SV=1	121	0	2	1	0	2	0	0	2	2	0	2	2
tr|Q05AX6|Q05AX6_XENLA	123	C	1	4	krt19	Krt19 protein OS=Xenopus laevis GN=krt19 PE=2 SV=1	443	1	2	2	2	2	1	2	2	1	2	3	2
sp|P08802|K118A_XENLA	123		0	0	krt18-a	Keratin, type I cytoskeletal 18-A OS=Xenopus laevis GN=krt18-a PE=2 SV=2	428	1	1	1	1	1	1	1	0	0	0	1	1
sp|Q7SY65|K118B_XENLA	123		0	0	krt18-b	Keratin, type I cytoskeletal 18-B OS=Xenopus laevis GN=krt18-b PE=2 SV=1	432	1	1	1	1	1	1	1	0	0	0	1	1
sp|P08777|K1C1_XENLA	123		0	0	xk81a1	Keratin, type I cytoskeletal 47 kDa OS=Xenopus laevis GN=xk81a1 PE=2 SV=1	429	1	1	1	1	1	1	1	1	2	1	1	1
sp|P05782|K1C3_XENLA	123	C	0	45	xk81b1	Keratin, type I cytoskeletal 47 kDa (Fragment) OS=Xenopus laevis GN=xk81b1 PE=3 SV=2	280	2	4	4	4	4	3	3	3	7	4	4	3
sp|P05781|K1C4_XENLA	123		0	0	xk81b2	Keratin, type I cytoskeletal 47 kDa OS=Xenopus laevis GN=xk81b2 PE=2 SV=1	419	1	2	2	2	2	2	1	2	4	2	2	1
tr|Q2VPN9|Q2VPN9_XENLA	123		0	0	xk81a1	MGC68905 protein OS=Xenopus laevis GN=xk81a1 PE=2 SV=1	437	1	1	1	1	1	1	1	1	2	1	1	1
tr|Q7ZY83|Q7ZY83_XENLA	123		0	0	LOC398464	LOC398464 protein (Fragment) OS=Xenopus laevis GN=LOC398464 PE=2 SV=1	469	1	2	2	2	2	2	1	2	4	2	2	1
tr|E3WF12|E3WF12_XENLA	123		0	0	FGK	Fin and gill-specific type-1 keratin OS=Xenopus laevis GN=FGK PE=2 SV=1	424	1	2	2	2	2	2	1	1	2	1	2	1
tr|Q7ZYN9|Q7ZYN9_XENLA	123	C	13	0		MGC53311 protein OS=Xenopus laevis PE=2 SV=1	375	1	2	3	3	2	1	2	3	2	1	2	3
tr|B7ZRD4|B7ZRD4_XENLA	123		0	0	ak-c-A	Ak-c-A protein OS=Xenopus laevis GN=ak-c-A PE=2 SV=1	492	2	4	4	4	4	2	4	2	4	4	4	4
tr|Q5XGU0|Q5XGU0_XENLA	123	C	0	28	krt17	LOC495266 protein OS=Xenopus laevis GN=krt17 PE=2 SV=1	452	2	3	3	4	3	3	2	5	6	2	5	3
tr|Q7T0X6|Q7T0X6_XENLA	123		0	0	MGC68905	MGC68905 protein OS=Xenopus laevis GN=MGC68905 PE=2 SV=1	437	1	1	1	1	1	1	1	1	2	1	1	1
tr|Q6IRP5|Q6IRP5_XENLA	123		0	0	krt19	MGC83069 protein OS=Xenopus laevis GN=krt19 PE=2 SV=1	412	1	2	2	2	2	1	2	0	0	1	2	2
tr|Q6DDD5|Q6DDD5_XENLA	123		0	0	krt16	Krt16-prov protein OS=Xenopus laevis GN=krt16 PE=2 SV=1	423	1	1	1	1	1	1	1	0	0	0	1	1
tr|Q4QR57|Q4QR57_XENLA	123		0	0	krt12	LOC398464 protein OS=Xenopus laevis GN=krt12 PE=2 SV=1	454	1	2	2	2	2	2	1	2	4	2	2	1
tr|Q8AV12|Q8AV12_XENLA	123		0	0	xak-c	Adult keratin XAK-C OS=Xenopus laevis GN=xak-c PE=2 SV=1	491	2	4	4	4	4	2	4	2	4	4	4	4
tr|Q6DKC7|Q6DKC7_XENLA	123		0	0	MGC84118	MGC84118 protein OS=Xenopus laevis GN=MGC84118 PE=2 SV=1	458	2	3	3	4	3	3	2	5	6	2	5	3
tr|A2BDA6|A2BDA6_XENLA	123		0	0	LOC100037084	LOC100037084 protein OS=Xenopus laevis GN=LOC100037084 PE=2 SV=1	423	1	2	2	2	2	1	2	0	0	1	2	2
tr|Q642P1|Q642P1_XENLA	123		0	0	LOC446967	LOC446967 protein (Fragment) OS=Xenopus laevis GN=LOC446967 PE=2 SV=1	467	2	4	4	4	4	2	4	2	4	4	4	4
sp|P02537|K1C0_XENLA	123	C	0	12		Keratin-3, type I cytoskeletal 51 kDa OS=Xenopus laevis PE=2 SV=1	486	0	1	2	1	2	0	1	0	0	1	3	1
tr|B7ZSA0|B7ZSA0_XENLA	123		0	0	xak-a	Adult keratin XAK-A OS=Xenopus laevis GN=xak-a PE=2 SV=1	414	0	1	1	1	1	0	1	0	0	1	1	1
tr|Q505L4|Q505L4_XENLA	123		0	0	LOC397864	LOC397864 protein OS=Xenopus laevis GN=LOC397864 PE=2 SV=1	483	0	1	2	1	2	0	1	0	0	1	3	1
tr|Q98UJ2|Q98UJ2_XENLA	123		0	0	krt24	Adult keratin XAK-A OS=Xenopus laevis GN=krt24 PE=2 SV=1	414	0	1	1	1	1	0	1	0	0	1	1	1
tr|Q91782|Q91782_XENLA	123		0	0		Xenopus laevis 3'-end of acidic type I cytokeratin (Fragment) OS=Xenopus laevis PE=2 SV=1	148	0	0	1	0	1	0	0	0	0	0	2	0
sp|Q52KD8|EAF6_XENLA	124	C	9	0	meaf6	Chromatin modification-related protein MEAF6 OS=Xenopus laevis GN=meaf6 PE=2 SV=1	188	0	1	2	0	2	1	0	1	1	0	1	0
tr|Q6NU02|Q6NU02_XENLA	125	C	0	3	eif4a1	LOC443739 protein OS=Xenopus laevis GN=eif4a1 PE=2 SV=1	406	0	1	1	1	2	0	1	1	1	0	1	2
tr|Q6AZL6|Q6AZL6_XENLA	125		0	0	LOC444845	LOC444845 protein OS=Xenopus laevis GN=LOC444845 PE=2 SV=1	406	0	1	1	1	2	0	1	1	1	0	1	2
tr|Q7ZX50|Q7ZX50_XENLA	125		0	0	LOC444845	LOC444845 protein (Fragment) OS=Xenopus laevis GN=LOC444845 PE=2 SV=1	404	0	1	1	1	2	0	1	1	1	0	1	2
tr|O42576|O42576_XENLA	125		0	0		Translation initiation factor eIF4A I OS=Xenopus laevis PE=2 SV=1	406	0	1	1	1	2	0	1	1	1	0	1	2
sp|O42226|I4A3B_XENLA	125		0	0	eif4a3-b	Eukaryotic initiation factor 4A-III-B OS=Xenopus laevis GN=eif4a3-b PE=2 SV=1	414	0	4	4	1	2	1	0	2	2	0	2	1
sp|Q5U526|I4A3A_XENLA	125	C	1	19	eif4a3-a	Eukaryotic initiation factor 4A-III-A OS=Xenopus laevis GN=eif4a3-a PE=2 SV=1	415	0	4	5	1	2	1	0	2	2	0	2	1
tr|O42577|O42577_XENLA	125		0	0		Translation initiation factor eIF4A II (Fragment) OS=Xenopus laevis PE=2 SV=1	413	0	1	1	1	1	0	1	1	1	0	1	2
sp|Q8QFR2|HIRA_XENLA	126	C	173	8	hira	Protein HIRA OS=Xenopus laevis GN=hira PE=1 SV=2	1013	0	28	26	0	24	18	0	22	23	0	23	17
tr|Q90W61|Q90W61_XENLA	126		0	0	hira	HIRA protein (Fragment) OS=Xenopus laevis GN=hira PE=2 SV=1	28	0	1	1	0	1	1	0	1	1	0	1	1
tr|A3KNE6|A3KNE6_XENLA	126	C	1	0	LOC100049116	LOC100049116 protein (Fragment) OS=Xenopus laevis GN=LOC100049116 PE=2 SV=1	58	0	1	1	0	1	1	0	1	2	0	1	1
sp|P50143|TCPG_XENLA	127	C	1	0	cct3	T-complex protein 1 subunit gamma OS=Xenopus laevis GN=cct3 PE=2 SV=2	547	0	0	0	0	0	0	0	0	0	0	0	1
sp|O93530|WRN_XENLA	128		0	0	wrn	Werner syndrome ATP-dependent helicase homolog OS=Xenopus laevis GN=wrn PE=2 SV=1	1436	0	5	12	0	9	5	0	15	18	0	13	5
tr|Q6GPM6|Q6GPM6_XENLA	128	C	13	82	FFA-1	FFA-1 protein OS=Xenopus laevis GN=FFA-1 PE=2 SV=1	1434	0	7	13	0	10	8	0	18	20	0	14	5
tr|Q6DDQ1|Q6DDQ1_XENLA	128		0	0	ccs	Ccs-prov protein OS=Xenopus laevis GN=ccs PE=2 SV=1	89	0	0	0	0	0	0	0	0	1	0	0	0
sp|Q7ZYS8|RL10A_XENLA	129	C	4	28	rpl10a	60S ribosomal protein L10a OS=Xenopus laevis GN=rpl10a PE=2 SV=1	217	0	3	4	0	5	4	0	5	4	0	5	2
tr|Q6EE54|Q6EE54_XENLA	129		0	0		Ribosomal protein (Fragment) OS=Xenopus laevis PE=2 SV=1	184	0	3	4	0	4	3	0	4	4	0	4	2
tr|Q6NRZ9|Q6NRZ9_XENLA	130	C	0	3	Xcdc6	Xcdc6 protein OS=Xenopus laevis GN=Xcdc6 PE=2 SV=1	554	0	0	2	0	1	0	0	0	0	0	0	0
tr|Q6XNN5|Q6XNN5_XENLA	130		0	0	cdc6B	Cdc6-related protein OS=Xenopus laevis GN=cdc6B PE=2 SV=1	553	0	0	2	0	1	0	0	0	0	0	0	0
tr|P79946|P79946_XENLA	130		0	0	Xcdc6	Cdc6-related protein OS=Xenopus laevis GN=Xcdc6 PE=2 SV=2	554	0	0	2	0	1	0	0	0	0	0	0	0
tr|Q6IP89|Q6IP89_XENLA	130		0	0	cdc6	Cdc6B protein OS=Xenopus laevis GN=cdc6 PE=2 SV=1	554	0	0	2	0	1	0	0	0	0	0	0	0
tr|P70044|P70044_XENLA	130		0	0	cdc6	Cell division control protein 6 OS=Xenopus laevis GN=cdc6 PE=2 SV=1	554	0	0	2	0	1	0	0	0	0	0	0	0
tr|Q5HZL6|Q5HZL6_XENLA	131	C	14	0	LOC496363	LOC496363 protein (Fragment) OS=Xenopus laevis GN=LOC496363 PE=2 SV=1	517	0	0	3	0	2	0	0	3	2	0	4	0
##tr|Q6GQF8|Q6GQF8_XENLA	132	C	0	1	##surf4.1	##MGC80096 protein OS=Xenopus laevis GN=surf4.1 PE=2 SV=1	269	0	0	0	0	0	1	0	0	0	0	0	0
##tr|Q6NTY0|Q6NTY0_XENLA	132		0	0	##surf4.2	##MGC81440 protein OS=Xenopus laevis GN=surf4.2 PE=2 SV=1	269	0	0	0	0	0	1	0	0	0	0	0	0
tr|Q6EKW2|Q6EKW2_XENLA	133	C	0	22	RAD26	Rad26 OS=Xenopus laevis GN=RAD26 PE=2 SV=1	798	0	1	4	0	5	4	0	4	3	0	5	3
tr|Q4V7U7|Q4V7U7_XENLA	133		0	0	RAD26	RAD26 protein OS=Xenopus laevis GN=RAD26 PE=2 SV=1	738	0	1	4	0	5	4	0	4	3	0	5	3
tr|Q5SDB4|Q5SDB4_XENLA	133		0	0	atrip	ATR-interacting protein OS=Xenopus laevis GN=atrip PE=2 SV=1	801	0	1	4	0	4	3	0	4	4	0	4	3
tr|B7ZS90|B7ZS90_XENLA	133	C	0	22		Uncharacterized protein OS=Xenopus laevis PE=2 SV=1	801	0	1	4	0	3	2	0	3	3	0	4	2
tr|B7ZS92|B7ZS92_XENLA	133		0	0	atrip	Atrip protein OS=Xenopus laevis GN=atrip PE=2 SV=1	801	0	1	5	0	4	3	0	4	4	0	5	3
tr|Q6INT0|Q6INT0_XENLA	134	C	63	350	top2a	DNA topoisomerase 2 OS=Xenopus laevis GN=top2a PE=2 SV=1	1579	5	45	55	6	52	47	7	49	54	10	46	37
tr|Q7ZXS2|Q7ZXS2_XENLA	134		0	0	LOC398512	DNA topoisomerase 2 (Fragment) OS=Xenopus laevis GN=LOC398512 PE=2 SV=1	1132	5	39	47	5	42	40	6	41	46	9	39	31
sp|Q56R14|TRI33_XENLA	135	C	0	31	trim33	E3 ubiquitin-protein ligase TRIM33 OS=Xenopus laevis GN=trim33 PE=1 SV=1	1091	0	5	5	0	6	2	0	3	4	0	4	2
tr|B7ZRU5|B7ZRU5_XENLA	135		0	0	LOC733198	Ectodermin OS=Xenopus laevis GN=LOC733198 PE=2 SV=1	1091	0	5	5	0	6	2	0	3	4	0	4	2
tr|B7ZRX2|B7ZRX2_XENLA	135		0	0	LOC733198	Ectodermin OS=Xenopus laevis GN=LOC733198 PE=2 SV=1	1091	0	5	5	0	6	2	0	3	4	0	4	2
tr|Q2VPL5|Q2VPL5_XENLA	135		0	0	MGC131247	MGC131247 protein OS=Xenopus laevis GN=MGC131247 PE=2 SV=1	543	0	2	3	0	3	1	0	2	2	0	2	2
tr|Q6NRX8|Q6NRX8_XENLA	136	C	1	4	ttf2	MGC81081 protein OS=Xenopus laevis GN=ttf2 PE=2 SV=1	1187	0	1	0	0	0	1	0	1	2	0	0	0
tr|Q32NI3|Q32NI3_XENLA	136		0	0	hltf	MGC131155 protein OS=Xenopus laevis GN=hltf PE=2 SV=1	999	0	1	0	0	0	1	0	1	1	0	0	0
tr|Q642R8|Q642R8_XENLA	137	C	0	57	pold1	DNA polymerase OS=Xenopus laevis GN=pold1 PE=2 SV=1	1109	0	4	7	0	7	4	0	10	12	0	8	5
tr|D0VEW7|D0VEW7_XENLA	137		0	0	POL3	DNA polymerase OS=Xenopus laevis GN=POL3 PE=2 SV=1	1108	0	4	7	0	7	4	0	10	12	0	8	5
tr|A1A5K3|A1A5K3_XENLA	138	C	0	3	chd7	LOC443577 protein OS=Xenopus laevis GN=chd7 PE=2 SV=1	1848	0	0	2	0	0	0	0	1	0	0	0	0
tr|Q6INE9|Q6INE9_XENLA	138		0	0	LOC443577	LOC443577 protein (Fragment) OS=Xenopus laevis GN=LOC443577 PE=2 SV=1	788	0	0	2	0	0	0	0	1	0	0	0	0
tr|A0JMT6|A0JMT6_XENLA	138		0	0	LOC443577	LOC443577 protein (Fragment) OS=Xenopus laevis GN=LOC443577 PE=2 SV=1	930	0	0	2	0	0	0	0	1	0	0	0	0
sp|Q63ZP1|PHF10_XENLA	139	C	2	6	phf10	PHD finger protein 10 OS=Xenopus laevis GN=phf10 PE=2 SV=2	506	0	0	3	0	3	2	0	0	0	0	0	0
tr|Q6DDU1|Q6DDU1_XENLA	139		0	0	MGC82172	MGC82172 protein OS=Xenopus laevis GN=MGC82172 PE=2 SV=1	291	0	0	2	0	2	2	0	0	0	0	0	0
sp|Q5XH16|NH2L1_XENLA	140	C	9	18	snu13	NHP2-like protein 1 OS=Xenopus laevis GN=snu13 PE=2 SV=1	128	0	3	4	2	4	3	2	3	3	0	2	1
tr|Q7ZWY8|Q7ZWY8_XENLA	140		0	0	nhp2l1	Hoip-prov protein OS=Xenopus laevis GN=nhp2l1 PE=2 SV=1	128	0	2	3	1	2	2	1	2	2	0	2	1
sp|O13046|WDHD1_XENLA	141	C	0	23	wdhd1	WD repeat and HMG-box DNA-binding protein 1 OS=Xenopus laevis GN=wdhd1 PE=1 SV=1	1127	0	0	4	0	2	0	0	4	7	0	5	1
tr|Q2TAV8|Q2TAV8_XENLA	141		0	0	wdhd1	Wdhd1 protein OS=Xenopus laevis GN=wdhd1 PE=2 SV=1	1127	0	0	4	0	2	0	0	4	7	0	5	1
tr|Q6DDP9|Q6DDP9_XENLA	141		0	0	wdhd1	Wdhd1 protein (Fragment) OS=Xenopus laevis GN=wdhd1 PE=2 SV=1	871	0	0	4	0	2	0	0	4	6	0	4	1
tr|Q7ZX99|Q7ZX99_XENLA	142	C	1	9	Tia1	Tia1 protein (Fragment) OS=Xenopus laevis GN=Tia1 PE=2 SV=1	427	0	1	3	0	3	2	0	2	2	0	3	2
tr|Q90WN1|Q90WN1_XENLA	142		0	0	tiar	TIAR protein (Fragment) OS=Xenopus laevis GN=tiar PE=2 SV=1	389	0	1	3	0	2	2	0	2	2	0	3	2
tr|Q68EU5|Q68EU5_XENLA	142	C	2	10	tia1	MGC84540 protein OS=Xenopus laevis GN=tia1 PE=2 SV=1	389	0	1	1	0	3	1	0	1	1	0	3	1
tr|Q90WN0|Q90WN0_XENLA	142		0	0	tia-1	TIA-1 protein (Fragment) OS=Xenopus laevis GN=tia-1 PE=2 SV=1	388	0	1	1	0	2	1	0	1	1	0	2	1
tr|Q6DEF1|Q6DEF1_XENLA	142		0	0		Uncharacterized protein OS=Xenopus laevis PE=2 SV=1	385	0	1	1	0	2	1	0	1	1	0	2	1
tr|Q6IRD1|Q6IRD1_XENLA	143	C	2	0	srsf5	MGC78772 protein OS=Xenopus laevis GN=srsf5 PE=2 SV=1	157	0	1	1	0	1	1	1	1	2	1	1	1
tr|Q6GQZ2|Q6GQZ2_XENLA	143	C	0	13	srsf4	MGC83263 protein OS=Xenopus laevis GN=srsf4 PE=2 SV=1	259	0	0	2	0	2	1	1	2	2	1	1	1
tr|Q7ZXX0|Q7ZXX0_XENLA	143		0	0	MGC52712	MGC52712 protein OS=Xenopus laevis GN=MGC52712 PE=2 SV=1	261	0	0	2	0	2	1	1	2	2	1	1	1
tr|Q5XH43|Q5XH43_XENLA	144	C	1	3	srsf12	LOC495068 protein OS=Xenopus laevis GN=srsf12 PE=2 SV=1	251	0	0	1	0	0	0	0	1	0	0	2	0
tr|Q7ZTJ8|Q7ZTJ8_XENLA	144		0	0	srsf10	MGC53149 protein OS=Xenopus laevis GN=srsf10 PE=2 SV=1	258	0	0	1	0	0	0	0	1	0	0	1	0
tr|A1L2X9|A1L2X9_XENLA	145	C	43	0	LOC100036984	LOC100036984 protein (Fragment) OS=Xenopus laevis GN=LOC100036984 PE=2 SV=1	772	0	3	8	0	5	4	0	7	8	0	6	2
sp|Q4FZQ6|PR38A_XENLA	146	C	0	4	prpf38a	Pre-mRNA-splicing factor 38A OS=Xenopus laevis GN=prpf38a PE=2 SV=1	312	0	1	0	0	0	0	0	0	0	0	3	0
tr|Q6IP13|Q6IP13_XENLA	146		0	0	LOC432312	LOC432312 protein (Fragment) OS=Xenopus laevis GN=LOC432312 PE=2 SV=1	293	0	1	0	0	0	0	0	0	0	0	3	0
tr|Q6PCJ2|Q6PCJ2_XENLA	147	C	4	0	polr1b	DNA-directed RNA polymerase OS=Xenopus laevis GN=polr1b PE=2 SV=1	1134	0	0	3	0	0	0	0	0	0	0	1	0
tr|Q6GQ55|Q6GQ55_XENLA	148		0	0	LOC443589	LOC443589 protein (Fragment) OS=Xenopus laevis GN=LOC443589 PE=2 SV=1	444	0	0	3	0	3	1	0	1	1	0	0	0
tr|Q2TAV4|Q2TAV4_XENLA	148	C	13	9	prpf3	LOC443589 protein OS=Xenopus laevis GN=prpf3 PE=2 SV=1	679	0	1	5	0	5	3	0	3	3	0	2	0
tr|Q0D259|Q0D259_XENLA	149	C	10	0	LOC733145	LOC733145 protein (Fragment) OS=Xenopus laevis GN=LOC733145 PE=2 SV=1	186	1	1	1	1	1	1	1	1	1	0	1	0
sp|P08734|ENOA_XENLA	150		0	0	eno1	Alpha-enolase OS=Xenopus laevis GN=eno1 PE=2 SV=2	434	0	2	1	2	2	2	3	3	1	2	2	1
tr|Q7SZ25|Q7SZ25_XENLA	150		0	0	eno1	Eno1-prov protein OS=Xenopus laevis GN=eno1 PE=2 SV=1	434	0	2	1	2	2	2	3	3	1	2	2	1
tr|A1L3K7|A1L3K7_XENLA	150	C	11	31	LOC100037034	LOC100037034 protein OS=Xenopus laevis GN=LOC100037034 PE=2 SV=1	434	1	4	1	4	4	4	5	5	2	3	5	4
tr|Q8AVT0|Q8AVT0_XENLA	150		0	0	eno1	MGC53543 protein OS=Xenopus laevis GN=eno1 PE=2 SV=1	434	0	2	1	2	2	2	3	3	1	2	2	1
tr|Q7ZXA3|Q7ZXA3_XENLA	150		0	0	eno3	Eno3-prov protein OS=Xenopus laevis GN=eno3 PE=2 SV=1	434	0	2	1	2	2	3	3	2	1	1	3	3
sp|P62799|H4_XENLA	151	C	29	45		Histone H4 OS=Xenopus laevis PE=1 SV=2	103	1	8	9	2	8	7	2	9	9	2	9	8
tr|A2BDA0|A2BDA0_XENLA	151		0	0	hist1h4d	Histone H4 OS=Xenopus laevis GN=hist1h4d PE=2 SV=1	103	1	5	5	2	4	4	2	5	5	2	5	5
tr|Q6B827|Q6B827_XENLA	151		0	0		Histone H4 (Fragment) OS=Xenopus laevis PE=3 SV=1	43	1	3	3	2	2	2	2	3	3	2	3	3
sp|P52170|IMA5_XENLA	152	C	0	20	kpna1	Importin subunit alpha-5 OS=Xenopus laevis GN=kpna1 PE=1 SV=2	522	0	1	4	0	4	2	0	3	3	0	3	0
tr|Q4QR45|Q4QR45_XENLA	152		0	0	kpna7	Importin subunit alpha OS=Xenopus laevis GN=kpna7 PE=2 SV=1	522	0	1	4	0	4	2	0	3	3	0	3	0
sp|P52171|IMA1_XENLA	152		0	0	kpna2	Importin subunit alpha-1 OS=Xenopus laevis GN=kpna2 PE=1 SV=2	523	0	0	2	0	2	0	0	2	2	0	1	0
tr|Q0VGW7|Q0VGW7_XENLA	152		0	0	LOC398027	Importin subunit alpha OS=Xenopus laevis GN=LOC398027 PE=2 SV=1	523	0	0	2	0	2	0	0	2	2	0	1	0
tr|Q802C4|Q802C4_XENLA	153	C	44	0	brd7	BRD7 protein OS=Xenopus laevis GN=brd7 PE=2 SV=1	638	0	8	7	0	5	4	0	4	7	0	6	3
tr|Q2TAF1|Q2TAF1_XENLA	154	C	42	17	thrap3	Thrap3 protein OS=Xenopus laevis GN=thrap3 PE=2 SV=1	918	0	8	6	5	6	3	6	6	5	4	5	5
tr|Q8AVX6|Q8AVX6_XENLA	154		0	0	Thrap3	Thrap3 protein (Fragment) OS=Xenopus laevis GN=Thrap3 PE=2 SV=1	346	0	2	2	1	2	0	2	2	2	2	1	1
tr|Q7SZB1|Q7SZB1_XENLA	155	C	0	2	MGC64293	Profilin OS=Xenopus laevis GN=MGC64293 PE=2 SV=1	137	0	0	1	0	0	0	0	0	1	0	0	0
tr|Q7ZY51|Q7ZY51_XENLA	155		0	0	MGC64293	Profilin (Fragment) OS=Xenopus laevis GN=MGC64293 PE=2 SV=1	158	0	0	1	0	0	0	0	0	1	0	0	0
sp|Q8AVH1|RBBP7_XENLA	156	C	40	24	rbbp7	Histone-binding protein RBBP7 OS=Xenopus laevis GN=rbbp7 PE=2 SV=1	425	0	8	11	0	10	7	0	7	7	0	9	5
sp|Q6INH0|RBP4B_XENLA	156	C	0	1	rbbp4-b	Histone-binding protein RBBP4-B OS=Xenopus laevis GN=rbbp4-b PE=1 SV=3	425	0	3	4	0	4	2	0	3	4	0	3	2
sp|O93377|RBP4A_XENLA	156		0	0	rbbp4-a	Histone-binding protein RBBP4-A OS=Xenopus laevis GN=rbbp4-a PE=1 SV=3	425	0	3	4	0	4	2	0	3	4	0	3	2
tr|O93513|O93513_XENLA	157		0	0	orc3	Origin recognition complex associated protein p81 OS=Xenopus laevis GN=orc3 PE=2 SV=1	709	0	1	3	0	1	2	0	1	0	0	2	1
tr|Q7ZTR4|Q7ZTR4_XENLA	157	C	4	11	orc3l	Orc3l protein OS=Xenopus laevis GN=orc3l PE=2 SV=1	709	0	2	4	0	2	2	0	2	0	0	2	1
sp|P07222|NPM_XENLA	158	C	0	21	npm1	Nucleophosmin OS=Xenopus laevis GN=npm1 PE=1 SV=1	299	0	2	3	0	2	3	0	2	3	0	3	3
tr|Q7ZTP6|Q7ZTP6_XENLA	158		0	0	npm1	Npm1 protein OS=Xenopus laevis GN=npm1 PE=2 SV=1	300	0	2	3	0	2	3	0	2	3	0	3	3
tr|Q7SZ17|Q7SZ17_XENLA	158		0	0	MGC64305	MGC64305 protein OS=Xenopus laevis GN=MGC64305 PE=2 SV=1	299	0	2	2	0	2	2	0	2	2	0	2	2
tr|Q91802|Q91802_XENLA	158		0	0		NO38 OS=Xenopus laevis PE=2 SV=1	296	0	1	1	0	1	1	0	1	1	0	1	1
sp|P02434|RL35A_XENLA	159	C	0	8	rpl35a	60S ribosomal protein L35a OS=Xenopus laevis GN=rpl35a PE=3 SV=2	110	0	1	1	0	1	1	0	1	1	0	1	1
tr|Q7SZB0|Q7SZB0_XENLA	159		0	0	rpl35a	Rpl35a-prov protein OS=Xenopus laevis GN=rpl35a PE=2 SV=1	110	0	1	1	0	1	1	0	1	1	0	1	1
tr|Q05AU0|Q05AU0_XENLA	160	C	1	16	taf9b	E(Y)1 protein OS=Xenopus laevis GN=taf9b PE=2 SV=1	254	0	2	5	0	3	0	0	2	2	0	2	1
tr|Q641A8|Q641A8_XENLA	160		0	0	LOC494643	LOC494643 protein OS=Xenopus laevis GN=LOC494643 PE=2 SV=1	254	0	2	4	0	3	0	0	2	2	0	2	1
sp|Q6NRZ0|RCOR2_XENLA	161	C	4	2	rcor2	REST corepressor 2 OS=Xenopus laevis GN=rcor2 PE=2 SV=1	503	0	0	2	0	2	1	0	1	0	0	0	0
sp|Q90WN5|RCOR1_XENLA	161		0	0	rcor1	REST corepressor 1 OS=Xenopus laevis GN=rcor1 PE=2 SV=1	431	0	0	1	0	1	0	0	0	0	0	0	0
tr|Q5FWQ2|Q5FWQ2_XENLA	161		0	0	rcor1	Rcor1 protein OS=Xenopus laevis GN=rcor1 PE=2 SV=1	225	0	0	1	0	1	0	0	0	0	0	0	0
tr|B1H1W4|B1H1W4_XENLA	162	C	12	0	men1	LOC100158320 protein OS=Xenopus laevis GN=men1 PE=2 SV=1	675	0	2	3	0	2	3	0	1	1	0	0	0
sp|O42227|HDA1B_XENLA	163	C	0	61	hdac1-b	Probable histone deacetylase 1-B OS=Xenopus laevis GN=hdac1-b PE=1 SV=1	480	1	7	12	0	7	8	1	7	6	1	7	4
sp|Q91695|HDA1A_XENLA	163		0	0	hdac1-a	Probable histone deacetylase 1-A OS=Xenopus laevis GN=hdac1-a PE=1 SV=1	480	1	5	11	0	6	7	1	6	5	1	6	3
tr|Q7ZYT5|Q7ZYT5_XENLA	163		0	0	hdac1	Histone deacetylase OS=Xenopus laevis GN=hdac1 PE=2 SV=1	480	1	7	12	0	7	8	1	7	6	1	7	4
tr|Q7SYZ5|Q7SYZ5_XENLA	163	C	0	18	Hdac2	Hdac2 protein (Fragment) OS=Xenopus laevis GN=Hdac2 PE=2 SV=1	447	1	5	9	0	5	6	1	4	5	1	5	1
tr|Q66J55|Q66J55_XENLA	163		0	0	hdac2	Histone deacetylase OS=Xenopus laevis GN=hdac2 PE=2 SV=1	488	1	5	9	0	5	6	1	4	5	1	5	1
sp|Q6IRL9|HDAC3_XENLA	163		0	0	hdac3	Histone deacetylase 3 OS=Xenopus laevis GN=hdac3 PE=2 SV=2	428	0	0	1	0	1	1	0	1	1	0	1	0
sp|Q9DF36|DD21B_XENLA	164	C	0	2	ddx21-b	Nucleolar RNA helicase 2-B OS=Xenopus laevis GN=ddx21-b PE=2 SV=2	800	0	1	0	0	1	0	0	0	0	0	0	0
sp|Q9DF35|DD21A_XENLA	164		0	0	ddx21-a	Nucleolar RNA helicase 2-A OS=Xenopus laevis GN=ddx21-a PE=2 SV=2	759	0	1	0	0	1	0	0	0	0	0	0	0
tr|Q6AX07|Q6AX07_XENLA	164		0	0	LOC398188	LOC398188 protein (Fragment) OS=Xenopus laevis GN=LOC398188 PE=2 SV=1	397	0	1	0	0	1	0	0	0	0	0	0	0
tr|Q6NS16|Q6NS16_XENLA	165	C	1	0	irf9	MGC78843 protein OS=Xenopus laevis GN=irf9 PE=2 SV=1	397	0	0	0	0	0	0	0	1	0	0	0	0
sp|P62155|CALM_XENLA	166	C	0	9	calm1	Calmodulin OS=Xenopus laevis GN=calm1 PE=1 SV=2	149	0	1	2	0	1	1	0	1	1	0	1	1
tr|Q7SZ95|Q7SZ95_XENLA	166		0	0	Cam	Cam protein (Fragment) OS=Xenopus laevis GN=Cam PE=2 SV=1	143	0	1	2	0	1	1	0	1	1	0	1	1
sp|Q498E7|SMAL1_XENLA	167	C	84	7	smarcal1	SWI/SNF-related matrix-associated actin-dependent regulator of chromatin subfamily A-like protein 1 OS=Xenopus laevis GN=smarcal1 PE=2 SV=1	960	0	7	15	0	13	11	0	12	13	0	12	8
tr|Q7ZTQ2|Q7ZTQ2_XENLA	167		0	0	acsl1	Facl2 protein OS=Xenopus laevis GN=acsl1 PE=2 SV=1	698	0	1	1	0	0	1	0	1	1	0	1	1
tr|Q7ZTJ3|Q7ZTJ3_XENLA	167		0	0		MGC53832 protein OS=Xenopus laevis PE=2 SV=1	698	0	1	1	0	0	1	0	1	1	0	1	1
tr|Q4QQZ3|Q4QQZ3_XENLA	168	C	14	0	ppih	Peptidyl-prolyl cis-trans isomerase OS=Xenopus laevis GN=ppih PE=2 SV=1	177	0	2	2	0	1	1	0	1	2	0	3	2
sp|P22232|FBRL_XENLA	169	C	0	86	fbl	rRNA 2'-O-methyltransferase fibrillarin OS=Xenopus laevis GN=fbl PE=2 SV=1	323	2	10	12	4	9	5	3	11	10	2	11	7
tr|Q6GNA5|Q6GNA5_XENLA	169		0	0	LOC398434	LOC398434 protein OS=Xenopus laevis GN=LOC398434 PE=2 SV=1	323	2	10	12	4	9	5	3	11	10	2	11	7
tr|Q7ZX93|Q7ZX93_XENLA	169		0	0	LOC398434	LOC398434 protein (Fragment) OS=Xenopus laevis GN=LOC398434 PE=2 SV=1	340	2	10	12	4	9	5	3	11	10	2	11	7
sp|Q3KPW1|RNP1B_XENLA	170	C	0	2	rnps1-b	RNA-binding protein with serine-rich domain 1-B OS=Xenopus laevis GN=rnps1-b PE=2 SV=1	283	0	0	2	0	0	0	0	0	0	0	0	0
sp|Q5XG24|RNP1A_XENLA	170		0	0	rnps1-a	RNA-binding protein with serine-rich domain 1-A OS=Xenopus laevis GN=rnps1-a PE=2 SV=1	283	0	0	2	0	0	0	0	0	0	0	0	0
sp|P63282|UBC9_XENLA	171	C	29	0	ube2i	SUMO-conjugating enzyme UBC9 OS=Xenopus laevis GN=ube2i PE=1 SV=1	158	0	3	4	0	4	3	0	3	4	0	4	4
tr|C8YR60|C8YR60_XENLA	172	C	10	0	cenpc	Centromere protein C OS=Xenopus laevis GN=cenpc PE=2 SV=1	1400	0	2	6	0	0	0	0	0	0	0	2	0
tr|Q4VT49|Q4VT49_XENLA	173	C	29	0	fancl	Fanconi anemia complementation group L OS=Xenopus laevis GN=fancl PE=2 SV=1	372	0	3	4	0	4	4	0	4	4	0	3	3
sp|Q6DE08|AUKBA_XENLA	174	C	6	20	aurkb-a	Aurora kinase B-A OS=Xenopus laevis GN=aurkb-a PE=1 SV=1	361	0	3	7	0	2	2	0	2	6	0	3	1
sp|Q6GPL3|AUKBB_XENLA	174		0	0	aurkb-b	Aurora kinase B-B OS=Xenopus laevis GN=aurkb-b PE=2 SV=1	368	0	2	4	0	2	1	0	2	5	0	3	1
tr|Q6AZL7|Q6AZL7_XENLA	175	C	6	0	rps26	MGC86356 protein OS=Xenopus laevis GN=rps26 PE=2 SV=1	115	1	0	1	0	0	1	0	1	1	0	1	0
tr|Q4V7T0|Q4V7T0_XENLA	176	C	0	37	Mta2	Mta2 protein OS=Xenopus laevis GN=Mta2 PE=2 SV=1	669	0	4	7	0	8	4	0	2	4	0	5	3
tr|Q6AZP0|Q6AZP0_XENLA	176		0	0	MGC83056	MGC83056 protein OS=Xenopus laevis GN=MGC83056 PE=2 SV=1	672	0	4	7	0	7	4	0	2	4	0	5	3
tr|Q9PUN0|Q9PUN0_XENLA	176		0	0	mta2	Metastasis associated 1-like protein OS=Xenopus laevis GN=mta2 PE=2 SV=1	670	0	4	7	0	8	4	0	2	4	0	5	3
tr|Q640Z4|Q640Z4_XENLA	176		0	0	mta1	MGC83916 protein OS=Xenopus laevis GN=mta1 PE=2 SV=1	624	0	0	1	0	0	0	0	0	0	0	0	0
sp|Q6P9I7|SMC6_XENLA	177	C	50	0	smc6	Structural maintenance of chromosomes protein 6 OS=Xenopus laevis GN=smc6 PE=2 SV=1	1128	0	2	3	0	7	6	0	9	8	0	9	6
tr|Q2TAS5|Q2TAS5_XENLA	178	C	17	0	trim28	MGC130965 protein OS=Xenopus laevis GN=trim28 PE=2 SV=1	677	0	2	4	0	2	1	0	2	4	0	2	0
sp|P30759|ARGI1_XENLA	179	C	0	1	arg1	Arginase-1 OS=Xenopus laevis GN=arg1 PE=2 SV=1	316	0	0	0	0	0	0	0	0	1	0	0	0
tr|Q7ZYM1|Q7ZYM1_XENLA	179		0	0	arg1	Arginase OS=Xenopus laevis GN=arg1 PE=2 SV=1	323	0	0	0	0	0	0	0	0	1	0	0	0
tr|Q9PSI1|Q9PSI1_XENLA	180	C	2	22		Pre-mRNA binding K protein, hnRNP K OS=Xenopus laevis PE=4 SV=1	396	0	2	4	1	3	2	0	4	4	0	2	2
tr|Q7ZXK8|Q7ZXK8_XENLA	180	C	7	0	hnrnpk	Hnrpk protein OS=Xenopus laevis GN=hnrnpk PE=2 SV=1	399	1	1	3	1	5	3	0	4	6	0	3	2
tr|A4FVF5|A4FVF5_XENLA	181	C	0	2	LOC100049136	LOC100049136 protein OS=Xenopus laevis GN=LOC100049136 PE=2 SV=1	111	0	1	1	0	0	0	0	0	0	0	0	0
tr|Q6DJI6|Q6DJI6_XENLA	181		0	0		Uncharacterized protein OS=Xenopus laevis PE=2 SV=1	111	0	1	1	0	0	0	0	0	0	0	0	0
tr|Q7SZB6|Q7SZB6_XENLA	181		0	0	LOC398653	LOC398653 protein (Fragment) OS=Xenopus laevis GN=LOC398653 PE=2 SV=1	96	0	1	1	0	0	0	0	0	0	0	0	0
tr|C4N9Q9|C4N9Q9_XENLA	182	C	28	46	rad50	Rad50 OS=Xenopus laevis GN=rad50 PE=2 SV=1	1312	0	8	8	0	13	8	0	12	11	0	11	3
tr|Q5XH50|Q5XH50_XENLA	182		0	0	LOC495064	LOC495064 protein (Fragment) OS=Xenopus laevis GN=LOC495064 PE=2 SV=1	724	0	6	4	0	8	6	0	7	7	0	6	2
tr|Q4V843|Q4V843_XENLA	182		0	0	LOC495064	LOC495064 protein (Fragment) OS=Xenopus laevis GN=LOC495064 PE=2 SV=1	555	0	6	4	0	8	6	0	7	7	0	6	2
tr|Q4V835|Q4V835_XENLA	183	C	8	127	hells	HELLS protein OS=Xenopus laevis GN=hells PE=2 SV=1	838	0	18	25	0	20	19	0	16	16	0	12	9
tr|Q6DD35|Q6DD35_XENLA	183		0	0	HELLS	HELLS protein (Fragment) OS=Xenopus laevis GN=HELLS PE=2 SV=1	756	0	18	23	0	18	18	0	15	15	0	11	9
sp|Q4V7H8|BORE2_XENLA	184	C	24	0	cdca9	Borealin-2 OS=Xenopus laevis GN=cdca9 PE=1 SV=1	296	0	1	3	0	3	3	0	4	4	0	3	3
tr|Q52KT3|Q52KT3_XENLA	185	C	0	2	LOC733228	LOC733228 protein (Fragment) OS=Xenopus laevis GN=LOC733228 PE=2 SV=1	427	0	0	1	0	0	0	0	0	0	0	1	0
tr|Q4QR01|Q4QR01_XENLA	185		0	0	wdr18	MGC115442 protein OS=Xenopus laevis GN=wdr18 PE=2 SV=1	428	0	0	1	0	0	0	0	0	0	0	1	0
tr|Q8AVH2|Q8AVH2_XENLA	186	C	0	5	ckb	Ckb-prov protein OS=Xenopus laevis GN=ckb PE=2 SV=1	376	0	0	0	1	1	1	1	0	0	1	0	0
tr|Q7LZG6|Q7LZG6_XENLA	186		0	0		Creatine kinase isozyme IV (Fragment) OS=Xenopus laevis PE=3 SV=1	361	0	0	0	1	1	1	1	0	0	1	0	0
sp|Q6PAF6|AN32A_XENLA	187		0	0	anp32a	Acidic leucine-rich nuclear phosphoprotein 32 family member A OS=Xenopus laevis GN=anp32a PE=2 SV=1	244	0	0	2	0	2	2	0	1	1	0	0	0
tr|Q6GNU4|Q6GNU4_XENLA	187	C	7	8	anp32b	MGC80871 protein OS=Xenopus laevis GN=anp32b PE=2 SV=1	266	0	1	3	0	2	2	0	3	2	0	2	0
tr|Q505N3|Q505N3_XENLA	188	C	0	47	Smarcd1	Smarcd1 protein (Fragment) OS=Xenopus laevis GN=Smarcd1 PE=2 SV=1	496	0	6	9	0	7	4	0	6	6	0	6	3
tr|Q66IP7|Q66IP7_XENLA	188	C	1	14	smarcd2	MGC86299 protein OS=Xenopus laevis GN=smarcd2 PE=2 SV=1	465	0	4	5	0	5	5	0	5	5	0	3	3
tr|A1A5J8|A1A5J8_XENLA	188		0	0	smarcd1	Smarcd1 protein OS=Xenopus laevis GN=smarcd1 PE=2 SV=1	507	0	6	9	0	7	4	0	6	6	0	6	3
tr|Q52L33|Q52L33_XENLA	188	C	9	0	smarcd3	MGC115001 protein OS=Xenopus laevis GN=smarcd3 PE=2 SV=1	369	0	5	5	0	7	6	0	6	7	0	4	3
tr|Q6DCP7|Q6DCP7_XENLA	188		0	0	Smarcd1	Smarcd1 protein (Fragment) OS=Xenopus laevis GN=Smarcd1 PE=2 SV=1	513	0	6	9	0	7	4	0	6	6	0	6	3
tr|Q66J25|Q66J25_XENLA	188		0	0	Smarcd1	Smarcd1 protein (Fragment) OS=Xenopus laevis GN=Smarcd1 PE=2 SV=1	504	0	6	9	0	7	4	0	6	6	0	6	3
tr|Q7ZXG1|Q7ZXG1_XENLA	188		0	0	Smarcd1	Smarcd1 protein (Fragment) OS=Xenopus laevis GN=Smarcd1 PE=2 SV=1	481	0	6	9	0	7	4	0	6	6	0	6	3
tr|A2BD79|A2BD79_XENLA	189		0	0	LOC733436	LOC733436 protein (Fragment) OS=Xenopus laevis GN=LOC733436 PE=2 SV=1	474	0	8	13	2	7	5	2	7	7	1	8	8
tr|Q05AV9|Q05AV9_XENLA	189		0	0	LOC733436	LOC733436 protein (Fragment) OS=Xenopus laevis GN=LOC733436 PE=2 SV=1	450	0	7	13	2	7	5	2	7	7	1	8	8
tr|Q2VPE9|Q2VPE9_XENLA	189	C	4	68	LOC733436	LOC733436 protein (Fragment) OS=Xenopus laevis GN=LOC733436 PE=2 SV=1	510	0	9	14	2	7	5	2	8	7	1	9	8
sp|P51947|CCNH_XENLA	190	C	0	13	ccnh	Cyclin-H OS=Xenopus laevis GN=ccnh PE=1 SV=1	323	0	2	3	0	1	2	0	2	1	0	1	1
tr|Q3KQ83|Q3KQ83_XENLA	190		0	0	ccnh-A	Ccnh-A protein OS=Xenopus laevis GN=ccnh-A PE=2 SV=1	323	0	2	3	0	1	2	0	2	1	0	1	1
tr|Q6DFE3|Q6DFE3_XENLA	191	C	14	0	zmym2	Znf198-prov protein OS=Xenopus laevis GN=zmym2 PE=2 SV=1	1295	0	2	3	0	3	0	0	2	1	0	3	0
sp|Q8JHV9|BIR7A_XENLA	192	C	5	6	birc7-a	Baculoviral IAP repeat-containing protein 7-A OS=Xenopus laevis GN=birc7-a PE=1 SV=1	401	0	1	2	0	1	1	0	3	2	0	0	1
sp|A9ULZ2|BIR7B_XENLA	192		0	0	birc7-b	Baculoviral IAP repeat-containing protein 7-B OS=Xenopus laevis GN=birc7-b PE=2 SV=2	345	0	0	1	0	1	1	0	1	1	0	0	1
sp|Q4V862|CDK9A_XENLA	193	C	14	0	cdk9-a	Cyclin-dependent kinase 9-A OS=Xenopus laevis GN=cdk9-a PE=2 SV=1	376	0	3	4	0	4	4	0	3	3	0	3	1
sp|Q7ZX42|CDK9B_XENLA	193	C	0	12	cdk9-b	Cyclin-dependent kinase 9-B OS=Xenopus laevis GN=cdk9-b PE=2 SV=1	376	0	1	3	0	2	2	0	1	1	0	2	0
tr|Q52KT1|Q52KT1_XENLA	193		0	0	sf3b2	MGC115052 protein OS=Xenopus laevis GN=sf3b2 PE=2 SV=1	764	0	0	1	0	0	0	0	0	0	0	0	0
tr|A6H8J3|A6H8J3_XENLA	194	C	0	27	dclre1a	LOC733261 protein OS=Xenopus laevis GN=dclre1a PE=2 SV=1	932	0	1	3	0	3	3	0	5	5	0	5	2
tr|Q4V7N1|Q4V7N1_XENLA	194		0	0	LOC733261	LOC733261 protein (Fragment) OS=Xenopus laevis GN=LOC733261 PE=2 SV=1	526	0	1	3	0	3	3	0	5	5	0	5	2
tr|Q5M778|Q5M778_XENLA	195	C	1	0	polr2j	LOC496260 protein OS=Xenopus laevis GN=polr2j PE=2 SV=1	117	0	0	1	0	0	0	0	0	0	0	0	0
sp|Q6DDH2|RMI1_XENLA	196	C	21	0	rmi1	RecQ-mediated genome instability protein 1 OS=Xenopus laevis GN=rmi1 PE=2 SV=1	557	0	3	4	0	3	0	0	4	4	0	3	0
sp|Q5EAW4|MCM10_XENLA	197	C	33	0	mcm10	Protein MCM10 homolog OS=Xenopus laevis GN=mcm10 PE=1 SV=2	860	0	0	6	0	5	1	0	8	6	0	6	1
tr|Q7ZY58|Q7ZY58_XENLA	198	C	31	0	cdc73	MGC53995 protein OS=Xenopus laevis GN=cdc73 PE=2 SV=1	531	0	5	5	0	4	3	0	4	2	0	5	3
tr|Q802A8|Q802A8_XENLA	199	C	0	20	cbx3	Cbx3 protein OS=Xenopus laevis GN=cbx3 PE=2 SV=1	174	0	3	3	0	3	2	0	3	4	0	1	1
tr|O42156|O42156_XENLA	199		0	0	XHp1-gamma	Heterochromatin protein 1 gamma (Fragment) OS=Xenopus laevis GN=XHp1-gamma PE=2 SV=1	171	0	3	3	0	3	2	0	3	4	0	1	1
tr|Q7ZWZ6|Q7ZWZ6_XENLA	199		0	0	cbx3	Cbx3-prov protein OS=Xenopus laevis GN=cbx3 PE=2 SV=1	174	0	3	3	0	3	2	0	3	4	0	1	1
tr|Q7ZX12|Q7ZX12_XENLA	200	C	35	0	gtf2h1	Gtf2h1-prov protein OS=Xenopus laevis GN=gtf2h1 PE=2 SV=1	532	0	6	7	0	4	2	0	5	6	0	5	0
sp|Q9DF50|CLSPN_XENLA	201	C	0	12	clspn	Claspin OS=Xenopus laevis GN=clspn PE=1 SV=2	1285	0	2	4	0	1	0	0	2	2	0	1	0
tr|F8WKR8|F8WKR8_XENLA	201		0	0		Claspin OS=Xenopus laevis PE=2 SV=1	1286	0	2	4	0	1	0	0	2	2	0	1	0
tr|B7ZS70|B7ZS70_XENLA	201		0	0	LOC398192	LOC398192 protein OS=Xenopus laevis GN=LOC398192 PE=2 SV=1	1286	0	2	4	0	1	0	0	2	2	0	1	0
tr|Q641I4|Q641I4_XENLA	202	C	1	0	ogt	Ogt-prov protein OS=Xenopus laevis GN=ogt PE=2 SV=1	1063	0	0	1	0	0	0	0	0	0	0	0	0
tr|Q8AVN2|Q8AVN2_XENLA	203	C	0	8		Snrp116-pending-prov protein OS=Xenopus laevis PE=2 SV=1	974	0	0	0	0	0	1	1	1	2	0	2	1
tr|Q7ZXZ9|Q7ZXZ9_XENLA	203		0	0	eftud2	MGC53479 protein OS=Xenopus laevis GN=eftud2 PE=2 SV=1	974	0	0	0	0	0	1	1	1	2	0	2	1
tr|Q52MA1|Q52MA1_XENLA	203	C	3	0		Uncharacterized protein OS=Xenopus laevis PE=2 SV=1	858	1	0	0	0	0	1	2	1	1	1	1	1
tr|Q7ZXP8|Q7ZXP8_XENLA	203	C	3	0	eef2.1	Eef2-prov protein OS=Xenopus laevis GN=eef2.1 PE=2 SV=1	858	0	1	0	0	0	1	1	1	1	0	2	2
sp|Q6NRT3|SMU1_XENLA	204	C	9	0	smu1	WD40 repeat-containing protein SMU1 OS=Xenopus laevis GN=smu1 PE=2 SV=1	513	0	1	2	0	2	0	0	1	0	0	2	1
sp|Q9DED4|CIRBB_XENLA	205	C	18	5	cirbp-b	Cold-inducible RNA-binding protein B OS=Xenopus laevis GN=cirbp-b PE=1 SV=1	166	0	2	3	1	3	2	1	3	3	0	3	2
sp|O93235|CIRBA_XENLA	205	C	7	0	cirbp-a	Cold-inducible RNA-binding protein A OS=Xenopus laevis GN=cirbp-a PE=1 SV=2	166	0	1	2	0	2	0	0	3	3	0	1	0
sp|Q6P6Z0|DDB1_XENLA	206	C	83	0	ddb1	DNA damage-binding protein 1 OS=Xenopus laevis GN=ddb1 PE=2 SV=1	1140	0	11	16	0	10	8	0	9	13	0	9	7
tr|Q7T063|Q7T063_XENLA	207	C	0	11	ppp3r1	CanB protein OS=Xenopus laevis GN=ppp3r1 PE=2 SV=1	170	0	3	2	0	1	1	0	1	2	0	1	0
tr|Q6DJJ3|Q6DJJ3_XENLA	207		0	0	MGC82148	MGC82148 protein OS=Xenopus laevis GN=MGC82148 PE=2 SV=1	170	0	3	2	0	1	1	0	1	2	0	1	0
sp|P20911|CDK7_XENLA	208	C	11	0	cdk7	Cyclin-dependent kinase 7 OS=Xenopus laevis GN=cdk7 PE=1 SV=1	352	0	0	3	0	2	1	0	2	2	0	1	0
sp|P16878|K2C5_XENLA	209	C	17	43		Keratin, type II cytoskeletal OS=Xenopus laevis PE=2 SV=2	513	2	7	4	4	5	7	5	6	6	3	8	3
tr|Q5XGT4|Q5XGT4_XENLA	209	C	5	0	krt5.2	LOC495267 protein OS=Xenopus laevis GN=krt5.2 PE=2 SV=1	590	2	3	2	2	1	3	3	3	4	3	6	2
sp|P08776|K2C8_XENLA	209	C	19	1		Keratin, type II cytoskeletal 8 OS=Xenopus laevis PE=2 SV=1	502	2	4	3	4	4	5	3	3	4	2	4	2
tr|Q7ZXU4|Q7ZXU4_XENLA	209		0	0	krt8	Krt8 protein OS=Xenopus laevis GN=krt8 PE=2 SV=1	507	1	3	2	2	3	3	2	3	3	1	3	1
tr|Q98UJ3|Q98UJ3_XENLA	209	C	0	14	krt5.5	Larval keratin XLK OS=Xenopus laevis GN=krt5.5 PE=2 SV=1	580	3	4	4	3	3	3	3	6	4	3	4	2
tr|B7ZSI2|B7ZSI2_XENLA	209		0	0	lk-a	Lk-a protein OS=Xenopus laevis GN=lk-a PE=2 SV=1	579	3	4	4	3	3	3	3	6	4	3	4	2
tr|A1L2T3|A1L2T3_XENLA	209		0	0	krt5.6	LOC100036944 protein OS=Xenopus laevis GN=krt5.6 PE=2 SV=1	591	3	4	4	3	3	3	3	6	4	3	4	2
tr|A2BDA9|A2BDA9_XENLA	209	C	1	0	LOC100037087	LOC100037087 protein OS=Xenopus laevis GN=LOC100037087 PE=2 SV=1	490	2	3	3	2	2	2	3	4	2	2	3	1
sp|P24789|VIM1_XENLA	209		0	0	vim1	Vimentin-1/2 OS=Xenopus laevis GN=vim1 PE=2 SV=1	458	0	0	0	0	0	0	0	1	0	0	0	0
sp|P24790|VIM4_XENLA	209		0	0	vim4	Vimentin-4 OS=Xenopus laevis GN=vim4 PE=2 SV=1	463	0	0	0	0	0	0	0	1	0	0	0	0
tr|Q5XHE8|Q5XHE8_XENLA	209		0	0	krt5.4	Uncharacterized protein OS=Xenopus laevis GN=krt5.4 PE=2 SV=1	630	1	1	1	1	0	1	1	2	0	1	1	0
tr|Q6AX52|Q6AX52_XENLA	209		0	0	LOC397907	LOC397907 protein (Fragment) OS=Xenopus laevis GN=LOC397907 PE=2 SV=1	653	1	1	1	1	0	1	1	2	0	1	1	0
tr|Q7SZ33|Q7SZ33_XENLA	209		0	0	vim	Vim4 protein OS=Xenopus laevis GN=vim PE=2 SV=1	463	0	0	0	0	0	0	0	1	0	0	0	0
tr|Q7ZXC6|Q7ZXC6_XENLA	209		0	0	vim1	Vim1 protein OS=Xenopus laevis GN=vim1 PE=2 SV=2	458	0	0	0	0	0	0	0	1	0	0	0	0
tr|Q7ZX54|Q7ZX54_XENLA	209		0	0	vim4	Vim4 protein OS=Xenopus laevis GN=vim4 PE=2 SV=1	463	0	0	0	0	0	0	0	1	0	0	0	0
sp|P04266|K2C1_XENLA	209		0	0		Keratin, type II cytoskeletal I (Fragment) OS=Xenopus laevis PE=2 SV=1	425	1	1	1	1	0	1	1	1	0	1	1	0
sp|P04265|K2C2_XENLA	209		0	0		Keratin, type II cytoskeletal I (Fragment) OS=Xenopus laevis PE=2 SV=1	419	1	1	1	1	0	1	1	1	0	1	1	0
sp|P23787|TERA_XENLA	210	C	216	10	vcp	Transitional endoplasmic reticulum ATPase OS=Xenopus laevis GN=vcp PE=1 SV=3	805	16	22	21	14	21	16	16	22	19	16	23	20
sp|Q3B8D5|KATL2_XENLA	210		0	0	katnal2	Katanin p60 ATPase-containing subunit A-like 2 OS=Xenopus laevis GN=katnal2 PE=2 SV=1	505	1	1	1	0	1	1	0	1	1	1	1	1
tr|Q32N83|Q32N83_XENLA	211		0	0	zmym4	LOC414497 protein OS=Xenopus laevis GN=zmym4 PE=2 SV=1	914	0	3	3	0	2	1	0	3	3	0	2	0
tr|Q6NTK1|Q6NTK1_XENLA	211	C	16	17	zmym4	LOC414497 protein (Fragment) OS=Xenopus laevis GN=zmym4 PE=2 SV=1	1317	0	6	6	0	4	3	0	4	5	0	4	1
sp|P08537|TBA_XENLA	212	C	0	15	tuba	Tubulin alpha chain OS=Xenopus laevis GN=tuba PE=2 SV=2	449	0	1	1	1	2	2	2	1	1	0	2	2
tr|Q7ZWQ5|Q7ZWQ5_XENLA	212		0	0		Tuba6-prov protein OS=Xenopus laevis PE=2 SV=1	449	0	1	1	1	2	2	2	1	1	0	2	2
tr|A2RV72|A2RV72_XENLA	212		0	0	LOC100037141	LOC100037141 protein OS=Xenopus laevis GN=LOC100037141 PE=2 SV=1	449	0	1	1	1	2	2	2	1	1	0	2	2
tr|Q7ZYU9|Q7ZYU9_XENLA	212		0	0	tuba1a	Alphatub84b-prov protein OS=Xenopus laevis GN=tuba1a PE=2 SV=1	452	0	0	1	1	1	1	2	0	0	0	1	1
tr|A1L2T2|A1L2T2_XENLA	212		0	0	tuba4a	LOC100036943 protein OS=Xenopus laevis GN=tuba4a PE=2 SV=1	456	0	0	0	1	0	0	1	0	0	0	0	0
tr|Q7ZTP0|Q7ZTP0_XENLA	212		0	0	tuba3c	MGC53359 protein OS=Xenopus laevis GN=tuba3c PE=2 SV=1	450	0	0	1	0	1	1	1	0	0	0	1	1
tr|Q5PQ08|Q5PQ08_XENLA	212		0	0	tubal3	LOC496021 protein OS=Xenopus laevis GN=tubal3 PE=2 SV=1	441	0	0	1	0	1	1	1	0	0	0	1	1
tr|Q3KPX6|Q3KPX6_XENLA	212		0	0	LOC733365	LOC733365 protein (Fragment) OS=Xenopus laevis GN=LOC733365 PE=2 SV=1	470	0	0	1	0	1	1	1	0	0	0	1	1
tr|Q6DD58|Q6DD58_XENLA	212		0	0	tuba4b	Mec-12 protein OS=Xenopus laevis GN=tuba4b PE=2 SV=1	448	0	0	1	0	1	1	1	0	0	0	1	1
tr|A2RV89|A2RV89_XENLA	212		0	0	LOC733365	LOC733365 protein (Fragment) OS=Xenopus laevis GN=LOC733365 PE=2 SV=1	474	0	0	1	0	1	1	1	0	0	0	1	1
tr|Q32NH2|Q32NH2_XENLA	212		0	0	LOC733413	LOC733413 protein (Fragment) OS=Xenopus laevis GN=LOC733413 PE=2 SV=1	468	0	0	1	0	1	1	1	0	0	0	1	1
tr|Q6PHL6|Q6PHL6_XENLA	213	C	11	0	rps19	Rps19-prov protein OS=Xenopus laevis GN=rps19 PE=2 SV=1	146	0	1	1	0	1	1	0	3	2	0	1	1
sp|Q498L2|SLTM_XENLA	214	C	9	0	sltm	SAFB-like transcription modulator OS=Xenopus laevis GN=sltm PE=2 SV=1	998	0	1	0	0	2	1	0	3	1	0	1	0
tr|Q6DCJ2|Q6DCJ2_XENLA	215	C	27	0	ell2	MGC82755 protein OS=Xenopus laevis GN=ell2 PE=2 SV=1	494	0	4	7	0	3	2	0	3	4	0	4	0
sp|P25980|UBF1B_XENLA	216	C	0	123	ubtf-b	Nucleolar transcription factor 1-B OS=Xenopus laevis GN=ubtf-b PE=2 SV=1	701	0	14	17	0	19	13	0	16	16	0	16	12
sp|P25979|UBF1A_XENLA	216	C	33	0	ubtf-a	Nucleolar transcription factor 1-A OS=Xenopus laevis GN=ubtf-a PE=2 SV=1	677	0	14	18	0	19	13	0	18	17	0	16	12
tr|Q8AVJ8|Q8AVJ8_XENLA	216		0	0	ubtf-b	Ubtf-b protein OS=Xenopus laevis GN=ubtf-b PE=2 SV=1	701	0	14	17	0	19	13	0	16	16	0	16	12
tr|Q8AVP9|Q8AVP9_XENLA	217	C	10	0		Hnrpc-prov protein OS=Xenopus laevis PE=2 SV=1	263	0	0	4	1	3	1	1	1	3	0	2	1
sp|P19600|HNRPC_XENLA	217	C	2	7	hnrnpc	Heterogeneous nuclear ribonucleoprotein C OS=Xenopus laevis GN=hnrnpc PE=2 SV=1	282	0	1	2	0	2	0	0	1	1	0	2	0
tr|Q6NU35|Q6NU35_XENLA	218	C	6	0	dhx15	MGC81281 protein OS=Xenopus laevis GN=dhx15 PE=2 SV=1	761	0	1	3	0	0	0	0	0	1	0	1	0
tr|O57468|O57468_XENLA	219	C	12	10	ywhae	14-3-3 protein epsilon OS=Xenopus laevis GN=ywhae PE=2 SV=1	255	1	3	2	2	1	2	2	1	2	2	2	2
sp|Q52M98|1433T_XENLA	219		0	0	ywhaq	14-3-3 protein theta OS=Xenopus laevis GN=ywhaq PE=2 SV=2	245	0	1	1	1	1	1	1	1	1	0	1	1
sp|Q91896|1433Z_XENLA	219		0	0	ywhaz	14-3-3 protein zeta OS=Xenopus laevis GN=ywhaz PE=2 SV=2	245	0	1	1	1	1	1	1	1	1	0	1	1
sp|P29309|1433_XENLA	219		0	0		14-3-3-like protein (Fragment) OS=Xenopus laevis PE=2 SV=1	235	0	1	1	1	1	1	1	1	1	0	1	1
sp|Q5XHK2|143BA_XENLA	219		0	0	ywhab-a	14-3-3 protein beta/alpha-A OS=Xenopus laevis GN=ywhab-a PE=2 SV=1	244	0	1	1	1	1	1	1	1	1	0	1	1
sp|Q8AVQ3|143BB_XENLA	219		0	0	ywhab-b	14-3-3 protein beta/alpha-B OS=Xenopus laevis GN=ywhab-b PE=2 SV=1	244	0	1	1	1	1	1	1	1	1	0	1	1
sp|Q6PCG0|143GA_XENLA	219		0	0	ywhag-a	14-3-3 protein gamma-A OS=Xenopus laevis GN=ywhag-a PE=2 SV=1	247	0	1	1	1	1	1	1	1	1	0	1	1
sp|Q6NRY9|143GB_XENLA	219		0	0	ywhag-b	14-3-3 protein gamma-B OS=Xenopus laevis GN=ywhag-b PE=2 SV=1	247	0	1	1	1	1	1	1	1	1	0	1	1
tr|Q7ZXH6|Q7ZXH6_XENLA	219		0	0	ywhaq	Ywhaq-prov protein OS=Xenopus laevis GN=ywhaq PE=2 SV=1	246	0	1	1	1	1	1	1	1	1	0	1	1
tr|Q8AVW5|Q8AVW5_XENLA	219		0	0	ywhaz	Ywhaz-prov protein OS=Xenopus laevis GN=ywhaz PE=2 SV=1	245	0	1	1	1	1	1	1	1	1	0	1	1
tr|Q6DJE2|Q6DJE2_XENLA	219		0	0	ywhah	MGC84451 protein OS=Xenopus laevis GN=ywhah PE=2 SV=1	247	0	1	1	1	1	1	1	1	1	0	1	1
tr|Q6PGS3|Q6PGS3_XENLA	219		0	0	ywhaz	Ywhaz protein OS=Xenopus laevis GN=ywhaz PE=2 SV=1	245	0	1	1	1	1	1	1	1	1	0	1	1
tr|Q7ZX00|Q7ZX00_XENLA	220	C	0	4	kpna2	Importin subunit alpha OS=Xenopus laevis GN=kpna2 PE=2 SV=1	526	0	1	2	0	0	0	0	0	0	0	0	1
tr|Q7ZYI0|Q7ZYI0_XENLA	220		0	0		Importin subunit alpha OS=Xenopus laevis PE=2 SV=1	526	0	1	2	0	0	0	0	0	0	0	0	1
sp|Q5FWY4|MCM6M_XENLA	221	C	0	4	mmcm6	Maternal DNA replication licensing factor mcm6 OS=Xenopus laevis GN=mmcm6 PE=1 SV=1	821	0	1	3	0	0	0	0	0	0	0	0	0
tr|A0A090AZM4|A0A090AZM4_XENLA	221		0	0	Mcm6	DNA helicase OS=Xenopus laevis GN=Mcm6 PE=2 SV=1	821	0	1	3	0	0	0	0	0	0	0	0	0
sp|Q498J7|MC6ZA_XENLA	221		0	0	zmcm6-a	Zygotic DNA replication licensing factor mcm6-A OS=Xenopus laevis GN=zmcm6-a PE=1 SV=1	823	0	0	1	0	0	0	0	0	0	0	0	0
sp|Q7ZY18|MC6ZB_XENLA	221		0	0	zmcm6-b	Zygotic DNA replication licensing factor mcm6-B OS=Xenopus laevis GN=zmcm6-b PE=1 SV=1	825	0	0	1	0	0	0	0	0	0	0	0	0
tr|A0A090B468|A0A090B468_XENLA	221		0	0	mcm6.2	DNA helicase OS=Xenopus laevis GN=mcm6.2 PE=2 SV=1	825	0	0	1	0	0	0	0	0	0	0	0	0
tr|B7ZR96|B7ZR96_XENLA	222	C	9	33	LOC397919	LOC397919 protein OS=Xenopus laevis GN=LOC397919 PE=2 SV=1	704	1	13	13	6	14	13	8	14	14	2	14	14
tr|Q06459|Q06459_XENLA	222	C	0	3	ncl	Nucleolin OS=Xenopus laevis GN=ncl PE=2 SV=1	705	1	13	13	6	14	12	7	13	13	2	13	13
tr|B7ZR98|B7ZR98_XENLA	222		0	0	LOC397919	LOC397919 protein OS=Xenopus laevis GN=LOC397919 PE=2 SV=1	704	1	13	13	6	14	12	7	13	13	2	13	13
sp|P20397|NUCL_XENLA	222	C	25	84	ncl	Nucleolin OS=Xenopus laevis GN=ncl PE=2 SV=3	651	1	11	13	5	13	13	5	12	11	2	12	11
tr|A1A645|A1A645_XENLA	222		0	0		Uncharacterized protein (Fragment) OS=Xenopus laevis PE=2 SV=1	371	0	1	1	1	1	1	1	1	1	0	1	1
tr|A9ULV9|A9ULV9_XENLA	222		0	0		Uncharacterized protein (Fragment) OS=Xenopus laevis PE=2 SV=1	371	0	1	1	1	1	1	1	1	1	0	1	1
tr|Q8AVC8|Q8AVC8_XENLA	222		0	0	LOC397919	LOC397919 protein (Fragment) OS=Xenopus laevis GN=LOC397919 PE=2 SV=1	370	0	1	1	1	1	1	1	1	1	0	1	1
tr|Q3KPL2|Q3KPL2_XENLA	222		0	0		Uncharacterized protein (Fragment) OS=Xenopus laevis PE=2 SV=1	370	0	1	1	1	1	1	1	1	1	0	1	1
tr|Q6GQE3|Q6GQE3_XENLA	222		0	0		Uncharacterized protein (Fragment) OS=Xenopus laevis PE=2 SV=1	371	0	1	1	1	1	1	1	1	1	0	1	1
sp|Q91628|ORC2_XENLA	223	C	0	37	orc2	Origin recognition complex subunit 2 OS=Xenopus laevis GN=orc2 PE=2 SV=1	558	0	6	8	0	5	5	0	6	3	0	3	1
tr|Q5XGS9|Q5XGS9_XENLA	223		0	0	orc2	Orc2-a protein OS=Xenopus laevis GN=orc2 PE=2 SV=1	558	0	6	8	0	5	5	0	6	3	0	3	1
tr|A1L3F1|A1L3F1_XENLA	224	C	0	121	LOC398558	LOC398558 protein (Fragment) OS=Xenopus laevis GN=LOC398558 PE=2 SV=1	488	4	14	15	6	11	13	4	15	13	1	14	11
tr|Q6DEC4|Q6DEC4_XENLA	224	C	0	2	MGC78950	MGC78950 protein OS=Xenopus laevis GN=MGC78950 PE=2 SV=1	533	3	12	13	4	9	11	4	12	12	1	11	9
tr|Q3B8K0|Q3B8K0_XENLA	224		0	0	LOC398558	LOC398558 protein (Fragment) OS=Xenopus laevis GN=LOC398558 PE=2 SV=1	526	4	14	15	6	11	13	4	15	13	1	14	11
tr|Q7ZXX3|Q7ZXX3_XENLA	224		0	0	LOC398558	LOC398558 protein (Fragment) OS=Xenopus laevis GN=LOC398558 PE=2 SV=1	489	4	14	15	6	11	13	4	15	13	1	14	11
tr|Q0P3Q8|Q0P3Q8_XENLA	224		0	0	nop58	MGC78950 protein OS=Xenopus laevis GN=nop58 PE=2 SV=1	534	3	12	13	4	9	11	4	12	12	1	11	9
sp|P41115|RS11_XENLA	225	C	0	11	rps11	40S ribosomal protein S11 OS=Xenopus laevis GN=rps11 PE=2 SV=1	158	0	2	1	0	2	1	0	2	1	0	1	1
tr|Q7SZ77|Q7SZ77_XENLA	225		0	0	rps11	Rps11 protein OS=Xenopus laevis GN=rps11 PE=2 SV=1	158	0	2	1	0	2	1	0	2	1	0	1	1
tr|Q6GN08|Q6GN08_XENLA	226	C	21	13	ncapd3	LOC398742 protein OS=Xenopus laevis GN=ncapd3 PE=2 SV=1	1492	0	4	6	0	5	4	0	6	4	0	5	0
tr|Q6V393|Q6V393_XENLA	226		0	0		Condensin II non-SMC subunit (Fragment) OS=Xenopus laevis PE=2 SV=1	203	0	2	2	0	2	2	0	2	1	0	2	0
tr|Q6DE09|Q6DE09_XENLA	227	C	18	15	eif4enif1	Eif4enif1-prov protein OS=Xenopus laevis GN=eif4enif1 PE=2 SV=1	771	0	6	7	0	6	3	0	3	3	0	4	1
tr|B1H1P6|B1H1P6_XENLA	227	C	0	1	LOC414649	LOC414649 protein (Fragment) OS=Xenopus laevis GN=LOC414649 PE=2 SV=1	873	0	2	4	0	2	2	0	1	2	0	2	1
tr|Q6NU76|Q6NU76_XENLA	227		0	0	LOC414649	LOC414649 protein (Fragment) OS=Xenopus laevis GN=LOC414649 PE=2 SV=1	524	0	2	4	0	2	2	0	1	2	0	2	1
tr|Q7ZXV9|Q7ZXV9_XENLA	228	C	33	0	pms1	Pms1 protein OS=Xenopus laevis GN=pms1 PE=2 SV=1	925	0	0	0	0	0	0	0	12	14	0	3	4
tr|Q05AU3|Q05AU3_XENLA	229		0	0	rsrc1	Rsrc1 protein OS=Xenopus laevis GN=rsrc1 PE=2 SV=1	320	0	0	0	0	0	0	0	0	0	0	1	0
tr|Q66IS9|Q66IS9_XENLA	229	C	2	1	rsrc1	MGC84816 protein OS=Xenopus laevis GN=rsrc1 PE=2 SV=1	320	0	0	1	0	0	0	0	1	0	0	1	0
tr|A9UMN3|A9UMN3_XENLA	230	C	2	0	rnf216	LOC100137689 protein OS=Xenopus laevis GN=rnf216 PE=2 SV=1	865	0	0	0	0	1	0	0	0	1	0	0	0
tr|Q2NLA7|Q2NLA7_XENLA	231	C	6	104	parp1	Poly [ADP-ribose] polymerase OS=Xenopus laevis GN=parp1 PE=2 SV=1	1011	0	14	19	0	14	14	0	14	16	0	12	7
sp|P31669|PARP1_XENLA	231		0	0	parp1	Poly [ADP-ribose] polymerase 1 (Fragment) OS=Xenopus laevis GN=parp1 PE=2 SV=1	998	0	13	18	0	13	13	0	13	16	0	11	7
tr|Q566G1|Q566G1_XENLA	231		0	0	MGC115350	Poly [ADP-ribose] polymerase OS=Xenopus laevis GN=MGC115350 PE=2 SV=1	493	0	4	5	0	4	3	0	4	3	0	3	0
sp|D3IUT5|TICRR_XENLA	232	C	32	0	ticrr	Treslin OS=Xenopus laevis GN=ticrr PE=1 SV=1	1985	0	3	9	0	5	0	0	5	4	0	5	1
tr|O57438|O57438_XENLA	233		0	0		Serine/threonine-protein phosphatase OS=Xenopus laevis PE=2 SV=2	518	0	4	4	0	4	4	0	4	4	0	4	3
tr|Q6AXB0|Q6AXB0_XENLA	233	C	0	32	ppp3ca	Serine/threonine-protein phosphatase OS=Xenopus laevis GN=ppp3ca PE=2 SV=1	511	0	4	5	0	4	4	0	4	4	0	4	3
tr|Q801N4|Q801N4_XENLA	233		0	0		Serine/threonine-protein phosphatase OS=Xenopus laevis PE=2 SV=1	518	0	4	5	0	4	4	0	4	4	0	4	3
tr|Q9DEF7|Q9DEF7_XENLA	233		0	0		Serine/threonine-protein phosphatase OS=Xenopus laevis PE=2 SV=1	508	0	4	5	0	4	4	0	4	4	0	4	3
tr|Q6IR94|Q6IR94_XENLA	233		0	0	ppp3cb	Serine/threonine-protein phosphatase OS=Xenopus laevis GN=ppp3cb PE=2 SV=1	507	0	2	3	0	2	2	0	2	2	0	2	2
tr|Q6XV80|Q6XV80_XENLA	234	C	0	34	nbn	Nibrin OS=Xenopus laevis GN=nbn PE=1 SV=1	763	0	3	6	0	4	1	0	5	8	0	4	3
tr|Q6EKW1|Q6EKW1_XENLA	234		0	0	NBS1	Nibrin OS=Xenopus laevis GN=NBS1 PE=2 SV=1	763	0	3	5	0	4	1	0	5	7	0	4	3
tr|B7ZR97|B7ZR97_XENLA	234		0	0	LOC403373	Nibrin OS=Xenopus laevis GN=LOC403373 PE=2 SV=1	762	0	3	6	0	4	1	0	5	8	0	4	3
tr|B7ZR99|B7ZR99_XENLA	234		0	0	LOC403373	Nibrin OS=Xenopus laevis GN=LOC403373 PE=2 SV=1	762	0	3	6	0	4	1	0	5	8	0	4	3
tr|Q4V812|Q4V812_XENLA	234		0	0	LOC403373	LOC403373 protein (Fragment) OS=Xenopus laevis GN=LOC403373 PE=2 SV=1	492	0	2	3	0	2	0	0	3	5	0	3	1
tr|Q641A9|Q641A9_XENLA	234		0	0	LOC403373	LOC403373 protein (Fragment) OS=Xenopus laevis GN=LOC403373 PE=2 SV=1	555	0	2	3	0	2	0	0	3	5	0	3	1
tr|Q7ZYU2|Q7ZYU2_XENLA	235	C	0	4	hnrnpa0	LOC398455 protein (Fragment) OS=Xenopus laevis GN=hnrnpa0 PE=2 SV=1	308	0	0	2	0	0	0	0	0	4	0	0	0
tr|Q6DKN1|Q6DKN1_XENLA	235		0	0	LOC398455	LOC398455 protein OS=Xenopus laevis GN=LOC398455 PE=2 SV=1	303	0	0	2	0	0	0	0	0	4	0	0	0
sp|P17130|ROA1_XENLA	235	C	0	7	hnrnpa1	Heterogeneous nuclear ribonucleoproteins A1 homolog OS=Xenopus laevis GN=hnrnpa1 PE=2 SV=1	365	1	0	0	1	1	0	1	0	2	0	0	1
tr|Q7ZX33|Q7ZX33_XENLA	235		0	0	hnrnpa1	Hnrpa1 protein OS=Xenopus laevis GN=hnrnpa1 PE=2 SV=1	399	1	0	0	1	1	0	1	0	2	0	0	1
tr|Q6IP29|Q6IP29_XENLA	235		0	0	LOC397751	LOC397751 protein OS=Xenopus laevis GN=LOC397751 PE=2 SV=1	365	1	0	0	1	1	0	1	0	2	0	0	1
tr|Q7ZXF2|Q7ZXF2_XENLA	235		0	0		Hnrpa0-prov protein OS=Xenopus laevis PE=2 SV=1	308	0	0	1	0	0	0	0	0	3	0	0	0
sp|P51989|RO21_XENLA	235		0	0		Heterogeneous nuclear ribonucleoprotein A2 homolog 1 OS=Xenopus laevis PE=2 SV=1	346	0	0	0	0	0	0	0	0	2	0	0	0
sp|P51992|RO32_XENLA	235		0	0		Heterogeneous nuclear ribonucleoprotein A3 homolog 2 OS=Xenopus laevis PE=2 SV=1	385	0	0	0	0	0	0	0	0	2	0	0	0
sp|P51990|RO22_XENLA	235		0	0		Heterogeneous nuclear ribonucleoprotein A2 homolog 2 OS=Xenopus laevis PE=2 SV=1	358	0	0	0	0	0	0	0	0	2	0	0	0
sp|P51968|RO31_XENLA	235		0	0		Heterogeneous nuclear ribonucleoprotein A3 homolog 1 OS=Xenopus laevis PE=2 SV=1	373	0	0	0	0	0	0	0	0	2	0	0	0
tr|B7ZQP4|B7ZQP4_XENLA	235		0	0		Uncharacterized protein OS=Xenopus laevis PE=2 SV=1	348	0	0	0	0	0	0	0	0	2	0	0	0
tr|Q7ZWV4|Q7ZWV4_XENLA	235		0	0	hnrnpa2b1	Hnrpa2b1 protein OS=Xenopus laevis GN=hnrnpa2b1 PE=2 SV=1	346	0	0	0	0	0	0	0	0	2	0	0	0
tr|Q66IT0|Q66IT0_XENLA	235		0	0	MGC84815	MGC84815 protein OS=Xenopus laevis GN=MGC84815 PE=2 SV=1	291	0	0	0	0	0	0	0	0	2	0	0	0
tr|Q3KPP1|Q3KPP1_XENLA	235		0	0	MGC52881	MGC52881 protein OS=Xenopus laevis GN=MGC52881 PE=2 SV=1	346	0	0	0	0	0	0	0	0	2	0	0	0
tr|Q9PVV6|Q9PVV6_XENLA	236	C	0	34	set	TAF-Ibeta1 OS=Xenopus laevis GN=set PE=2 SV=1	278	0	4	4	0	4	4	1	4	4	0	5	4
tr|Q6INZ4|Q6INZ4_XENLA	236		0	0	MGC64240	MGC64240 protein OS=Xenopus laevis GN=MGC64240 PE=2 SV=1	278	0	4	4	0	4	4	1	4	4	0	5	4
tr|Q9PVV5|Q9PVV5_XENLA	236		0	0		TAF-Ibeta2 OS=Xenopus laevis PE=2 SV=1	278	0	4	4	0	4	4	1	4	4	0	4	4
tr|Q6PGT4|Q6PGT4_XENLA	236		0	0	set	MGC64240 protein OS=Xenopus laevis GN=set PE=2 SV=1	278	0	2	2	0	2	2	1	2	2	0	3	2
tr|Q08B65|Q08B65_XENLA	237	C	8	0	tfdp2	LOC100158337 protein OS=Xenopus laevis GN=tfdp2 PE=2 SV=1	376	0	2	2	0	1	2	0	0	0	0	1	0
tr|Q7ZYI5|Q7ZYI5_XENLA	238	C	28	0	actl6a	Baf53a-pending-prov protein OS=Xenopus laevis GN=actl6a PE=2 SV=1	429	0	4	6	0	4	4	0	3	2	0	1	4
sp|P62972|UBIQP_XENLA	239	C	0	53		Polyubiquitin (Fragment) OS=Xenopus laevis PE=1 SV=2	167	2	5	6	4	6	4	3	4	7	3	4	5
tr|A0JMV0|A0JMV0_XENLA	239		0	0	MGC154789	MGC154789 protein OS=Xenopus laevis GN=MGC154789 PE=2 SV=1	305	2	5	6	4	6	4	3	4	7	3	4	5
tr|Q6GMC1|Q6GMC1_XENLA	239		0	0	rps27a	MGC81889 protein OS=Xenopus laevis GN=rps27a PE=2 SV=1	156	2	5	6	4	6	4	3	4	7	3	4	5
tr|Q7SY79|Q7SY79_XENLA	239		0	0	ubc	Ubc-prov protein OS=Xenopus laevis GN=ubc PE=2 SV=1	609	2	5	6	4	6	4	3	4	7	3	4	5
tr|Q7ZXG5|Q7ZXG5_XENLA	239		0	0	ubb	MGC53081 protein OS=Xenopus laevis GN=ubb PE=2 SV=1	380	2	5	6	4	6	4	3	4	7	3	4	5
tr|Q6GQF3|Q6GQF3_XENLA	239		0	0	uba52	MGC80109 protein OS=Xenopus laevis GN=uba52 PE=2 SV=1	128	2	5	6	4	6	4	3	4	7	3	4	5
tr|Q6NRU3|Q6NRU3_XENLA	240	C	30	0	rfc2	MGC81391 protein OS=Xenopus laevis GN=rfc2 PE=2 SV=1	348	0	3	3	0	5	3	0	5	4	0	5	2
tr|Q92134|Q92134_XENLA	241		0	0		Xenopus laevis histone gene cluster Xlh1 with genes H3, H4, H2B, H2A and H1B OS=Xenopus laevis PE=4 SV=2	76	0	2	1	0	2	2	0	0	2	0	1	2
sp|P84233|H32_XENLA	241	C	0	36		Histone H3.2 OS=Xenopus laevis PE=1 SV=2	136	0	5	4	0	5	5	0	3	5	0	4	5
sp|Q6PI79|H33_XENLA	241		0	0		Histone H3.3 OS=Xenopus laevis PE=1 SV=3	136	0	5	4	0	5	5	0	3	5	0	4	5
sp|P02302|H3C_XENLA	241		0	0	h3f3c	Histone H3.3C OS=Xenopus laevis GN=h3f3c PE=1 SV=2	136	0	5	4	0	5	5	0	3	5	0	4	5
tr|Q92133|Q92133_XENLA	241		0	0	hist1h3g	Histone H3 OS=Xenopus laevis GN=hist1h3g PE=1 SV=1	136	0	5	4	0	5	5	0	3	5	0	4	5
tr|Q92132|Q92132_XENLA	241		0	0	H3r	Histone H3 OS=Xenopus laevis GN=H3r PE=3 SV=1	136	0	3	2	0	3	3	0	1	3	0	2	3
tr|Q92135|Q92135_XENLA	241		0	0		Histone H3 (Fragment) OS=Xenopus laevis PE=4 SV=1	78	0	2	1	0	2	2	0	0	2	0	1	2
sp|Q569M3|CENPA_XENLA	241		0	0	cenpa	Histone H3-like centromeric protein A OS=Xenopus laevis GN=cenpa PE=2 SV=1	150	0	1	1	0	1	1	0	1	1	0	1	1
tr|Q5XH71|Q5XH71_XENLA	242	C	4	8	LOC495052	Inhibitor of growth protein OS=Xenopus laevis GN=LOC495052 PE=2 SV=1	236	0	3	3	0	1	1	0	2	1	0	1	0
tr|Q5U5C1|Q5U5C1_XENLA	242		0	0	ing5	Inhibitor of growth protein OS=Xenopus laevis GN=ing5 PE=2 SV=1	236	0	2	2	0	1	1	0	2	0	0	0	0
tr|A3KNF0|A3KNF0_XENLA	243	C	0	2		Uncharacterized protein OS=Xenopus laevis PE=2 SV=1	77	0	0	0	0	1	1	0	0	0	0	0	0
tr|Q66KQ2|Q66KQ2_XENLA	243		0	0	LOC446966	LOC446966 protein (Fragment) OS=Xenopus laevis GN=LOC446966 PE=2 SV=1	77	0	0	0	0	1	1	0	0	0	0	0	0
sp|Q8AVC1|AN32B_XENLA	244	C	0	14	anp32b	Acidic leucine-rich nuclear phosphoprotein 32 family member B OS=Xenopus laevis GN=anp32b PE=2 SV=1	239	0	2	2	0	2	1	0	2	2	0	3	0
tr|Q2TAF9|Q2TAF9_XENLA	244		0	0	anp32c	MGC132157 protein OS=Xenopus laevis GN=anp32c PE=2 SV=1	245	0	2	2	0	2	1	0	2	2	0	3	0
sp|P70032|PLK1_XENLA	245	C	19	0	plk1	Serine/threonine-protein kinase PLK1 OS=Xenopus laevis GN=plk1 PE=1 SV=1	598	0	2	2	0	4	3	0	0	4	0	4	0
##tr|Q5HZ85|Q5HZ85_XENLA	246	C	1	0	##chst13	##MGC85103 protein OS=Xenopus laevis GN=chst13 PE=2 SV=1	331	0	1	0	0	0	0	0	0	0	0	0	0
sp|Q7SYU0|RS8_XENLA	247	C	0	26	rps8	40S ribosomal protein S8 OS=Xenopus laevis GN=rps8 PE=2 SV=3	208	0	4	5	1	3	1	0	4	2	0	4	2
tr|Q6DJI0|Q6DJI0_XENLA	247		0	0	MGC83421	40S ribosomal protein S8 OS=Xenopus laevis GN=MGC83421 PE=2 SV=1	208	0	4	5	1	3	1	0	4	2	0	4	2
tr|Q6EE53|Q6EE53_XENLA	247		0	0		40S ribosomal protein S8 (Fragment) OS=Xenopus laevis PE=2 SV=1	189	0	3	4	0	2	0	0	3	1	0	3	1
sp|Q4R1J6|BI51B_XENLA	248	C	1	0	birc5.1-b	Baculoviral IAP repeat-containing protein 5.1-B OS=Xenopus laevis GN=birc5.1-b PE=2 SV=1	160	0	0	1	0	0	0	0	0	0	0	0	0
sp|Q8JGN5|BI51A_XENLA	249	C	2	0	birc5.1-a	Baculoviral IAP repeat-containing protein 5.1-A OS=Xenopus laevis GN=birc5.1-a PE=1 SV=1	160	0	1	0	0	0	0	0	1	0	0	0	0
sp|Q6INA9|SETB1_XENLA	250	C	10	0	setdb1	Histone-lysine N-methyltransferase SETDB1 OS=Xenopus laevis GN=setdb1 PE=2 SV=1	1269	0	2	5	0	2	0	0	0	1	0	0	0
sp|Q8QHA5|DNA2_XENLA	251	C	2	0	dna2	DNA replication ATP-dependent helicase/nuclease DNA2 OS=Xenopus laevis GN=dna2 PE=1 SV=1	1053	0	0	0	0	0	0	0	0	1	0	1	0
tr|Q7ZY06|Q7ZY06_XENLA	252	C	6	0	u2af2	U2af2 protein OS=Xenopus laevis GN=u2af2 PE=2 SV=2	456	0	0	1	0	1	1	0	0	1	0	1	1
sp|A2RRX6|NPAT_XENLA	253	C	134	0	npat	Protein NPAT OS=Xenopus laevis GN=npat PE=2 SV=1	1356	0	18	22	0	18	16	0	20	16	0	13	11
tr|Q52KD5|Q52KD5_XENLA	254	C	15	0	LOC733229	LOC733229 protein (Fragment) OS=Xenopus laevis GN=LOC733229 PE=2 SV=1	294	0	2	2	0	2	2	0	2	2	0	1	2
tr|A8QZK6|A8QZK6_XENLA	255	C	0	10	xeco2	XEco2 OS=Xenopus laevis GN=xeco2 PE=2 SV=1	702	0	2	2	0	2	0	0	2	0	0	2	0
tr|Q4KLP7|Q4KLP7_XENLA	255		0	0	esco2	MGC115718 protein OS=Xenopus laevis GN=esco2 PE=2 SV=1	640	0	2	2	0	2	0	0	2	0	0	2	0
sp|P15308|B4_XENLA	256	C	0	9	b4	Protein B4 OS=Xenopus laevis GN=b4 PE=1 SV=1	273	0	0	1	0	3	2	0	3	0	0	0	0
tr|Q5XHJ2|Q5XHJ2_XENLA	256		0	0	h1foo	B4 protein OS=Xenopus laevis GN=h1foo PE=2 SV=1	283	0	0	1	0	3	2	0	3	0	0	0	0
sp|P51951|MAT1_XENLA	257	C	8	0	mnat1	CDK-activating kinase assembly factor MAT1 OS=Xenopus laevis GN=mnat1 PE=2 SV=1	309	0	2	1	0	1	1	0	1	0	0	1	1
sp|Q58HI1|PELP1_XENLA	258	C	2	0	pelp1	Proline-, glutamic acid- and leucine-rich protein 1 OS=Xenopus laevis GN=pelp1 PE=1 SV=1	1012	0	0	0	0	0	0	0	0	1	0	1	0
tr|Q4V7M4|Q4V7M4_XENLA	259	C	18	2	top1.2	MGC115546 protein OS=Xenopus laevis GN=top1.2 PE=2 SV=1	503	0	2	6	0	6	2	0	2	2	0	0	0
sp|P41512|TOP1_XENLA	259		0	0	top1	DNA topoisomerase 1 OS=Xenopus laevis GN=top1 PE=2 SV=1	829	0	0	1	0	1	0	0	0	0	0	0	0
tr|Q6AZV3|Q6AZV3_XENLA	260	C	0	12	rpl17	MGC78885 protein OS=Xenopus laevis GN=rpl17 PE=2 SV=1	184	0	1	2	0	2	1	0	2	2	0	2	0
tr|Q7ZY53|Q7ZY53_XENLA	260		0	0	rpl17	RPL17 protein (Fragment) OS=Xenopus laevis GN=rpl17 PE=2 SV=1	187	0	1	2	0	2	1	0	2	2	0	2	0
tr|Q6EE51|Q6EE51_XENLA	260		0	0		Ribosomal protein L17 (Fragment) OS=Xenopus laevis PE=2 SV=1	157	0	0	0	0	0	0	0	0	1	0	0	0
tr|Q6NTX9|Q6NTX9_XENLA	261	C	44	0	sub1	MGC81442 protein OS=Xenopus laevis GN=sub1 PE=2 SV=1	128	0	6	6	1	4	4	1	4	5	1	7	5
tr|W0UQE8|W0UQE8_XENLA	262	C	0	11	rad18	E3 ubiquitin ligase OS=Xenopus laevis GN=rad18 PE=2 SV=1	492	0	0	0	0	0	1	0	3	4	0	3	0
tr|W0USK2|W0USK2_XENLA	262		0	0	rad18	E3 ubiquitin ligase (Fragment) OS=Xenopus laevis GN=rad18 PE=2 SV=1	250	0	0	0	0	0	1	0	2	3	0	3	0
tr|W0US81|W0US81_XENLA	262		0	0	rad18	E3 ubiquitin ligase (Fragment) OS=Xenopus laevis GN=rad18 PE=2 SV=1	243	0	0	0	0	0	1	0	2	2	0	1	0
sp|P49401|RS4_XENLA	263	C	19	0	rps4	40S ribosomal protein S4 OS=Xenopus laevis GN=rps4 PE=2 SV=4	263	0	2	3	0	3	2	0	3	3	0	3	0
tr|Q7SZT0|Q7SZT0_XENLA	264	C	0	9	eaf2	ELL associated factor 2 OS=Xenopus laevis GN=eaf2 PE=2 SV=1	250	0	2	3	0	1	0	0	1	1	0	1	0
tr|Q6PAG5|Q6PAG5_XENLA	264		0	0	eaf2	MGC68453 protein OS=Xenopus laevis GN=eaf2 PE=2 SV=1	251	0	2	3	0	1	0	0	1	1	0	1	0
sp|P70062|T7L1A_XENLA	265	C	0	12	tcf7l1-a	Transcription factor 7-like 1-A OS=Xenopus laevis GN=tcf7l1-a PE=1 SV=1	554	0	1	3	0	3	0	0	2	2	0	1	0
sp|Q90ZB6|T7L1B_XENLA	265		0	0	tcf7l1-b	Transcription factor 7-like 1-B OS=Xenopus laevis GN=tcf7l1-b PE=1 SV=1	551	0	1	3	0	3	0	0	2	2	0	1	0
sp|P70063|T7L1C_XENLA	265		0	0	tcf7l1-c	Transcription factor 7-like 1-C OS=Xenopus laevis GN=tcf7l1-c PE=2 SV=1	550	0	1	3	0	3	0	0	2	2	0	1	0
sp|P70064|T7L1D_XENLA	265		0	0	tcf7l1-d	Transcription factor 7-like 1-D OS=Xenopus laevis GN=tcf7l1-d PE=2 SV=1	550	0	1	3	0	3	0	0	2	2	0	1	0
tr|Q68F71|Q68F71_XENLA	265		0	0	tcf7	Tcf7 protein OS=Xenopus laevis GN=tcf7 PE=2 SV=1	464	0	0	1	0	1	0	0	1	1	0	0	0
tr|Q90ZB7|Q90ZB7_XENLA	265		0	0		Lymphoid enhancer factor XLEF-1B OS=Xenopus laevis PE=2 SV=1	372	0	0	1	0	1	0	0	1	1	0	0	0
tr|Q9YHZ3|Q9YHZ3_XENLA	265		0	0	Lef-1	Lymphoid enhancer factor 1 OS=Xenopus laevis GN=Lef-1 PE=2 SV=1	372	0	0	1	0	1	0	0	1	1	0	0	0
tr|B7ZQ53|B7ZQ53_XENLA	265		0	0	tcf7l1	Transcription factor XTCF-3b OS=Xenopus laevis GN=tcf7l1 PE=2 SV=1	554	0	1	3	0	3	0	0	2	2	0	1	0
tr|Q90ZB5|Q90ZB5_XENLA	265		0	0	tcf7l2	T-cell factor XTCF-4A OS=Xenopus laevis GN=tcf7l2 PE=2 SV=1	482	0	0	1	0	1	0	0	1	1	0	0	0
tr|Q98997|Q98997_XENLA	265		0	0		Transcription factor XTCF-3b (Fragment) OS=Xenopus laevis PE=2 SV=1	466	0	1	3	0	3	0	0	2	2	0	1	0
tr|Q90ZB4|Q90ZB4_XENLA	265		0	0		T-cell factor XTCF-4C OS=Xenopus laevis PE=2 SV=1	473	0	0	1	0	1	0	0	1	1	0	0	0
tr|Q90ZB8|Q90ZB8_XENLA	265		0	0	lef1	Lymphoid enhancer factor XLEF-1 OS=Xenopus laevis GN=lef1 PE=2 SV=1	372	0	0	1	0	1	0	0	1	1	0	0	0
sp|Q7ZYL5|KF22B_XENLA	266	C	1	17	kif22-b	Kinesin-like protein KIF22-B OS=Xenopus laevis GN=kif22-b PE=2 SV=2	650	0	2	4	0	4	1	0	2	3	0	2	0
sp|Q9I869|KF22A_XENLA	266		0	0	kif22-a	Kinesin-like protein KIF22-A OS=Xenopus laevis GN=kif22-a PE=1 SV=1	651	0	2	4	0	3	1	0	2	3	0	2	0
tr|A0AUU1|A0AUU1_XENLA	267	C	42	0	mlh1	LOC100036779 protein OS=Xenopus laevis GN=mlh1 PE=2 SV=1	750	0	0	0	0	0	0	0	16	12	0	9	5
sp|Q91857|TAF6_XENLA	268	C	5	0	taf6	Transcription initiation factor TFIID subunit 6 OS=Xenopus laevis GN=taf6 PE=2 SV=3	618	0	2	2	0	0	0	0	0	1	0	0	0
sp|Q9W6K2|EXO1_XENLA	269	C	21	0	exo1	Exonuclease 1 OS=Xenopus laevis GN=exo1 PE=2 SV=1	734	0	2	1	0	1	0	0	6	9	0	1	1
sp|Q4KLU2|PRP39_XENLA	270	C	34	0	prpf39	Pre-mRNA-processing factor 39 OS=Xenopus laevis GN=prpf39 PE=2 SV=1	641	1	3	7	1	3	0	2	4	5	1	6	1
tr|Q7ZXD0|Q7ZXD0_XENLA	271	C	15	21		MGC53266 protein OS=Xenopus laevis PE=2 SV=1	581	0	2	7	0	5	3	0	4	7	0	5	3
tr|Q566I4|Q566I4_XENLA	271	C	0	8	LOC446268	LOC446268 protein OS=Xenopus laevis GN=LOC446268 PE=2 SV=1	579	0	4	6	0	4	2	0	4	5	0	3	1
tr|Q6AX54|Q6AX54_XENLA	271		0	0	LOC446268	LOC446268 protein (Fragment) OS=Xenopus laevis GN=LOC446268 PE=2 SV=1	611	0	4	6	0	4	2	0	4	5	0	3	1
sp|Q5XGU5|DNJ6B_XENLA	272	C	0	10	dnajb6-b	DnaJ homolog subfamily B member 6-B OS=Xenopus laevis GN=dnajb6-b PE=2 SV=1	245	0	1	1	0	1	1	0	2	2	0	1	1
sp|Q5FWN8|DNJ6A_XENLA	272		0	0	dnajb6-a	DnaJ homolog subfamily B member 6-A OS=Xenopus laevis GN=dnajb6-a PE=2 SV=1	250	0	1	1	0	1	1	0	2	2	0	1	1
##sp|Q9DDA9|PACN2_XENLA	273	C	0	2	##pacsin2	##Protein kinase C and casein kinase substrate in neurons protein 2 OS=Xenopus laevis GN=pacsin2 PE=2 SV=1	477	0	0	0	0	0	1	0	1	0	0	0	0
##tr|Q5U494|Q5U494_XENLA	273		0	0	##LOC495704	##LOC495704 protein (Fragment) OS=Xenopus laevis GN=LOC495704 PE=2 SV=1	344	0	0	0	0	0	1	0	1	0	0	0	0
##tr|A1A5I4|A1A5I4_XENLA	273		0	0		##Uncharacterized protein OS=Xenopus laevis PE=2 SV=1	445	0	0	0	0	0	1	0	1	0	0	0	0
tr|A4IFX5|A4IFX5_XENLA	274	C	2	0	LOC100049142	LOC100049142 protein (Fragment) OS=Xenopus laevis GN=LOC100049142 PE=2 SV=1	739	0	0	0	0	0	0	0	2	0	0	0	0
sp|Q5XG48|MED4_XENLA	275	C	1	0	med4	Mediator of RNA polymerase II transcription subunit 4 OS=Xenopus laevis GN=med4 PE=2 SV=1	252	0	0	1	0	0	0	0	0	0	0	0	0
tr|D2CGM1|D2CGM1_XENLA	276	C	14	0	fancc	Fanconi anemia complementation group C OS=Xenopus laevis GN=fancc PE=2 SV=1	541	0	1	2	0	2	2	0	2	2	0	2	1
sp|O42584|NO29_XENLA	277	C	0	1		Nucleoplasmin-like protein NO29 OS=Xenopus laevis PE=2 SV=1	183	0	0	0	0	0	0	0	0	0	0	1	0
tr|B7ZP66|B7ZP66_XENLA	277		0	0	NO29	Nucleolar protein NO29 OS=Xenopus laevis GN=NO29 PE=2 SV=1	183	0	0	0	0	0	0	0	0	0	0	1	0
tr|Q66L02|Q66L02_XENLA	277		0	0	npm3	MGC85274 protein OS=Xenopus laevis GN=npm3 PE=2 SV=1	171	0	0	0	0	0	0	0	0	0	0	1	0
tr|Q641D1|Q641D1_XENLA	278	C	13	0	dmap1	MGC82015 protein OS=Xenopus laevis GN=dmap1 PE=2 SV=1	464	0	1	3	0	3	1	0	2	2	0	1	0
sp|Q6GLQ4|PP1RA_XENLA	279	C	8	0	ppp1r10	Serine/threonine-protein phosphatase 1 regulatory subunit 10 OS=Xenopus laevis GN=ppp1r10 PE=2 SV=1	819	0	2	1	0	1	0	0	1	1	0	2	0
tr|Q9PWM7|Q9PWM7_XENLA	280	C	0	12	cdc7	Protein kinase Cdc7 OS=Xenopus laevis GN=cdc7 PE=2 SV=1	483	0	2	3	0	3	2	0	1	0	0	0	1
tr|O13045|O13045_XENLA	280		0	0		Cdc7-related kinase OS=Xenopus laevis PE=2 SV=1	483	0	2	3	0	3	2	0	1	0	0	0	1
tr|A2BDA2|A2BDA2_XENLA	281	C	3	1	LOC100037080	40S ribosomal protein SA OS=Xenopus laevis GN=LOC100037080 PE=2 SV=1	295	0	0	0	0	0	1	0	0	2	0	0	1
sp|Q3ZM03|RSSA_XENLA	281		0	0	rpsa	40S ribosomal protein SA OS=Xenopus laevis GN=rpsa PE=1 SV=1	306	0	0	0	0	0	0	0	0	1	0	0	0
tr|Q7ZX07|Q7ZX07_XENLA	281		0	0	rpsa	40S ribosomal protein SA OS=Xenopus laevis GN=rpsa PE=2 SV=1	306	0	0	0	0	0	0	0	0	1	0	0	0
tr|Q7SZA5|Q7SZA5_XENLA	282	C	1	0	rpl29	MGC64312 protein OS=Xenopus laevis GN=rpl29 PE=2 SV=1	75	0	1	0	0	0	0	0	0	0	0	0	0
tr|Q6DTN6|Q6DTN6_XENLA	283		0	0	ppia	Peptidyl-prolyl cis-trans isomerase OS=Xenopus laevis GN=ppia PE=2 SV=1	164	0	0	2	0	0	0	0	0	0	0	1	1
tr|Q6NUH4|Q6NUH4_XENLA	283		0	0	CypA	Peptidyl-prolyl cis-trans isomerase (Fragment) OS=Xenopus laevis GN=CypA PE=2 SV=1	192	0	0	2	0	0	0	0	0	0	0	1	1
tr|Q7SZ12|Q7SZ12_XENLA	283		0	0	CypA	Peptidyl-prolyl cis-trans isomerase (Fragment) OS=Xenopus laevis GN=CypA PE=2 SV=1	193	0	0	2	0	0	0	0	0	0	0	1	1
tr|Q70YG6|Q70YG6_XENLA	283	C	0	21	cyp	Peptidyl-prolyl cis-trans isomerase (Fragment) OS=Xenopus laevis GN=cyp PE=2 SV=1	157	0	2	4	1	2	2	1	2	2	0	3	2
tr|Q8AVP8|Q8AVP8_XENLA	283		0	0		Peptidyl-prolyl cis-trans isomerase OS=Xenopus laevis PE=2 SV=1	164	0	2	4	1	2	2	1	2	2	0	3	2
sp|Q4QR29|CTR9_XENLA	284	C	34	0	ctr9	RNA polymerase-associated protein CTR9 homolog OS=Xenopus laevis GN=ctr9 PE=2 SV=1	1157	0	3	6	0	5	2	0	3	6	0	6	3
tr|Q5XGW2|Q5XGW2_XENLA	285	C	0	1	psmf1	LOC495127 protein (Fragment) OS=Xenopus laevis GN=psmf1 PE=2 SV=1	263	0	0	1	0	0	0	0	0	0	0	0	0
tr|Q58E13|Q58E13_XENLA	285		0	0	LOC495127	LOC495127 protein (Fragment) OS=Xenopus laevis GN=LOC495127 PE=2 SV=1	262	0	0	1	0	0	0	0	0	0	0	0	0
sp|Q09003|COIL_XENLA	286	C	43	0	coil	Coilin OS=Xenopus laevis GN=coil PE=2 SV=2	536	2	3	8	2	5	3	3	4	4	2	3	4
tr|Q6NTX4|Q6NTX4_XENLA	287	C	6	0	ubxn7	UBX domain-containing protein 7 OS=Xenopus laevis GN=ubxn7 PE=2 SV=1	488	0	0	2	0	1	0	0	2	0	0	1	0
sp|Q91989|P5F13_XENLA	288	C	0	4	pou5f1.3	POU domain, class 5, transcription factor 1.3 OS=Xenopus laevis GN=pou5f1.3 PE=1 SV=1	426	0	1	1	0	0	0	0	1	1	0	0	0
tr|R4IMU9|R4IMU9_XENLA	288		0	0		POU domain protein OS=Xenopus laevis PE=2 SV=1	432	0	1	1	0	0	0	0	1	1	0	0	0
sp|Q0IH86|SLX1_XENLA	289	C	1	0	slx1a	Structure-specific endonuclease subunit slx1 OS=Xenopus laevis GN=slx1a PE=2 SV=1	282	0	0	0	0	1	0	0	0	0	0	0	0
tr|Q7ZXE5|Q7ZXE5_XENLA	290	C	5	0	xrcc1	Xrcc1-prov protein OS=Xenopus laevis GN=xrcc1 PE=2 SV=1	651	0	0	2	0	1	0	0	0	2	0	0	0
tr|Q6GNA3|Q6GNA3_XENLA	291	C	0	6	LOC398563	LOC398563 protein OS=Xenopus laevis GN=LOC398563 PE=2 SV=1	589	0	1	2	0	1	1	0	1	0	0	0	0
tr|Q7ZXU0|Q7ZXU0_XENLA	291		0	0	LOC398563	LOC398563 protein (Fragment) OS=Xenopus laevis GN=LOC398563 PE=2 SV=1	593	0	1	2	0	1	1	0	1	0	0	0	0
tr|Q7ZYM9|Q7ZYM9_XENLA	291	C	0	1	ppp2r1b	Ppp2r1b protein OS=Xenopus laevis GN=ppp2r1b PE=2 SV=1	589	0	0	2	0	1	0	0	0	0	0	0	0
tr|Q92139|Q92139_XENLA	291		0	0	PP2A	Phosphorylase phosphatase OS=Xenopus laevis GN=PP2A PE=2 SV=1	589	0	0	2	0	1	0	0	0	0	0	0	0
tr|Q645K2|Q645K2_XENLA	292	C	0	18	hnrnpd	P37 AUF1 OS=Xenopus laevis GN=hnrnpd PE=2 SV=1	295	2	2	1	2	1	3	0	1	1	1	2	2
tr|Q4V7K8|Q4V7K8_XENLA	292		0	0	LOC496375	LOC496375 protein OS=Xenopus laevis GN=LOC496375 PE=2 SV=1	286	2	2	1	2	1	3	0	1	1	1	2	2
tr|A9JS62|A9JS62_XENLA	293	C	27	0	LOC100127317	LOC100127317 protein (Fragment) OS=Xenopus laevis GN=LOC100127317 PE=2 SV=1	580	0	4	5	0	4	3	0	3	3	0	2	3
tr|A5D6R5|A5D6R5_XENLA	294	C	1	0	nop10	LOC100049738 protein OS=Xenopus laevis GN=nop10 PE=2 SV=1	64	0	0	0	0	0	0	0	0	1	0	0	0
tr|Q7SZT9|Q7SZT9_XENLA	295	C	0	5	nploc4	Npl4 protein OS=Xenopus laevis GN=nploc4 PE=2 SV=1	610	0	0	2	0	0	0	0	1	2	0	0	0
tr|Q63ZR4|Q63ZR4_XENLA	295		0	0	LOC494816	LOC494816 protein OS=Xenopus laevis GN=LOC494816 PE=2 SV=1	610	0	0	2	0	0	0	0	1	2	0	0	0
sp|Q6GM65|PLAP_XENLA	296	C	0	4	plaa	Phospholipase A-2-activating protein OS=Xenopus laevis GN=plaa PE=2 SV=2	799	0	0	1	0	0	0	0	1	2	0	0	0
tr|Q08B76|Q08B76_XENLA	296		0	0	plaa	LOC100158335 protein OS=Xenopus laevis GN=plaa PE=2 SV=1	799	0	0	1	0	0	0	0	1	2	0	0	0
tr|Q6GPW8|Q6GPW8_XENLA	297		0	0	kat7	Histone acetyltransferase OS=Xenopus laevis GN=kat7 PE=2 SV=1	617	0	1	2	0	1	2	0	2	1	0	1	1
tr|Q6PCK3|Q6PCK3_XENLA	297		0	0		Histone acetyltransferase OS=Xenopus laevis PE=2 SV=1	535	0	1	2	0	1	2	0	2	1	0	1	1
tr|Q6AZV6|Q6AZV6_XENLA	297	C	3	11	myst2	Histone acetyltransferase OS=Xenopus laevis GN=myst2 PE=2 SV=1	553	0	1	2	0	2	3	0	2	1	0	2	1
tr|Q9YHY5|Q9YHY5_XENLA	298	C	0	16	hnrnpu	Scaffold attachment factor A OS=Xenopus laevis GN=hnrnpu PE=2 SV=1	774	0	1	0	2	2	2	2	2	1	0	1	3
tr|Q5U5E2|Q5U5E2_XENLA	298		0	0	Saf-A	Saf-A protein OS=Xenopus laevis GN=Saf-A PE=2 SV=1	772	0	1	0	2	2	2	2	2	1	0	1	3
tr|Q7ZTJ7|Q7ZTJ7_XENLA	298		0	0	hnrnpu	Hnrnpu protein (Fragment) OS=Xenopus laevis GN=hnrnpu PE=2 SV=1	555	0	1	0	2	2	2	2	2	1	0	1	3
tr|Q698P6|Q698P6_XENLA	299	C	7	0	fancf	Fanconi anemia protein OS=Xenopus laevis GN=fancf PE=2 SV=1	339	0	0	1	0	0	1	0	1	3	0	1	0
sp|Q6GMD2|WDR61_XENLA	300	C	14	0	wdr61	WD repeat-containing protein 61 OS=Xenopus laevis GN=wdr61 PE=2 SV=1	305	0	3	2	0	1	1	0	2	2	0	2	1
tr|Q6GPP8|Q6GPP8_XENLA	301	C	19	8	hba-l5	MGC82702 protein OS=Xenopus laevis GN=hba-l5 PE=2 SV=1	139	1	3	4	1	3	3	1	3	4	0	3	1
sp|P06636|HBA3_XENLA	301		0	0	hba3	Hemoglobin subunit alpha-3 OS=Xenopus laevis GN=hba3 PE=2 SV=2	142	0	1	1	1	0	1	0	1	1	0	1	1
sp|P06637|HBA4_XENLA	301		0	0	hba4	Hemoglobin subunit alpha-4 OS=Xenopus laevis GN=hba4 PE=2 SV=2	142	0	1	1	1	0	1	0	1	1	0	1	1
sp|P06638|HBA5_XENLA	301		0	0	hba5	Hemoglobin subunit alpha-5 OS=Xenopus laevis GN=hba5 PE=2 SV=2	142	0	1	1	1	0	1	0	1	1	0	1	1
tr|Q7SYU7|Q7SYU7_XENLA	301		0	0	hba3	Hba3 protein OS=Xenopus laevis GN=hba3 PE=2 SV=1	142	0	1	1	1	0	1	0	1	1	0	1	1
tr|Q7ZWY6|Q7ZWY6_XENLA	302	C	16	0	rpl9	Rpl9-prov protein OS=Xenopus laevis GN=rpl9 PE=2 SV=1	192	0	2	2	0	2	2	1	2	2	0	2	1
tr|Q8AVX7|Q8AVX7_XENLA	303	C	0	40	smarce1	Smarce1 protein OS=Xenopus laevis GN=smarce1 PE=2 SV=1	402	0	3	7	0	5	4	0	6	5	0	6	4
tr|Q5XH26|Q5XH26_XENLA	303		0	0	smarce1	Smarce1 protein OS=Xenopus laevis GN=smarce1 PE=2 SV=1	423	0	3	7	0	5	4	0	6	5	0	6	4
tr|Q8QG95|Q8QG95_XENLA	303		0	0		Baf57 OS=Xenopus laevis PE=2 SV=1	423	0	3	7	0	5	4	0	6	5	0	6	4
sp|O57686|SMO1A_XENLA	304	C	0	11	sumo1-a	Small ubiquitin-related modifier 1-A OS=Xenopus laevis GN=sumo1-a PE=1 SV=1	102	0	2	2	0	2	1	0	2	1	0	1	0
sp|Q5EAX4|SMO1B_XENLA	304		0	0	sumo1-b	Small ubiquitin-related modifier 1-B OS=Xenopus laevis GN=sumo1-b PE=3 SV=1	102	0	2	2	0	2	1	0	2	1	0	1	0
tr|B7ZQM3|B7ZQM3_XENLA	304		0	0	MGC85025	Small ubiquitin-related modifier OS=Xenopus laevis GN=MGC85025 PE=2 SV=1	102	0	2	2	0	2	1	0	2	1	0	1	0
sp|O93610|DPOD2_XENLA	305	C	13	0	pold2	DNA polymerase delta subunit 2 OS=Xenopus laevis GN=pold2 PE=2 SV=1	463	0	0	0	0	1	1	0	4	4	0	1	2
tr|Q6NUG0|Q6NUG0_XENLA	306	C	5	0	hspe1	MGC79030 protein OS=Xenopus laevis GN=hspe1 PE=2 SV=1	102	1	0	0	0	1	0	1	0	0	1	0	1
sp|Q6PAF4|NSE1_XENLA	307	C	13	0	nsmce1	Non-structural maintenance of chromosomes element 1 homolog OS=Xenopus laevis GN=nsmce1 PE=2 SV=1	270	0	0	1	0	2	1	0	2	4	0	2	1
sp|Q4KLA0|CCNC_XENLA	308	C	7	0	ccnc	Cyclin-C OS=Xenopus laevis GN=ccnc PE=2 SV=1	283	0	0	1	0	1	1	0	2	1	0	1	0
sp|P28021|CSK2B_XENLA	309	C	1	0	csnk2b	Casein kinase II subunit beta OS=Xenopus laevis GN=csnk2b PE=1 SV=1	215	0	0	1	0	0	0	0	0	0	0	0	0
sp|P52301|RAN_XENLA	310	C	24	0	ran	GTP-binding nuclear protein Ran OS=Xenopus laevis GN=ran PE=1 SV=2	216	3	3	2	0	1	2	1	2	3	2	2	3
tr|Q66J80|Q66J80_XENLA	311	C	0	3		Uncharacterized protein OS=Xenopus laevis PE=2 SV=1	1059	0	1	2	0	0	0	0	0	0	0	0	0
tr|Q9W6S7|Q9W6S7_XENLA	311		0	0	sin3a	Transcription co-repressor Sin3 OS=Xenopus laevis GN=sin3a PE=2 SV=1	1275	0	1	2	0	0	0	0	0	0	0	0	0
tr|B7ZSK4|B7ZSK4_XENLA	311		0	0		Uncharacterized protein OS=Xenopus laevis PE=2 SV=1	1278	0	1	2	0	0	0	0	0	0	0	0	0
tr|Q6INJ6|Q6INJ6_XENLA	312	C	0	1		Uncharacterized protein OS=Xenopus laevis PE=2 SV=1	307	0	0	1	0	0	0	0	0	0	0	0	0
tr|Q6P704|Q6P704_XENLA	312		0	0	ufd1l	MGC68571 protein OS=Xenopus laevis GN=ufd1l PE=2 SV=1	307	0	0	1	0	0	0	0	0	0	0	0	0
tr|Q9DG03|Q9DG03_XENLA	312		0	0		Ubiquitin fusion degradation 1-like protein (Fragment) OS=Xenopus laevis PE=2 SV=1	305	0	0	1	0	0	0	0	0	0	0	0	0
tr|Q6DCY8|Q6DCY8_XENLA	313	C	4	19	wdr5	Wdr5-prov protein OS=Xenopus laevis GN=wdr5 PE=2 SV=1	334	0	4	4	0	4	1	0	4	4	0	2	0
tr|Q66J98|Q66J98_XENLA	313		0	0	wdr5	Wdr5-b-prov protein OS=Xenopus laevis GN=wdr5 PE=2 SV=1	334	0	3	3	0	4	1	0	3	3	0	2	0
tr|Q4FZN2|Q4FZN2_XENLA	314	C	0	10	rnaseh2a	Ribonuclease OS=Xenopus laevis GN=rnaseh2a PE=2 SV=1	302	0	0	1	0	1	1	0	1	3	0	2	1
tr|Q6GNJ4|Q6GNJ4_XENLA	314		0	0	LOC443655	Ribonuclease (Fragment) OS=Xenopus laevis GN=LOC443655 PE=2 SV=1	305	0	0	1	0	1	1	0	1	3	0	2	1
tr|Q6GPA0|Q6GPA0_XENLA	315	C	9	0	taf6l	MGC80584 protein OS=Xenopus laevis GN=taf6l PE=2 SV=1	574	0	1	1	0	2	1	0	1	2	0	1	0
tr|Q6IRR5|Q6IRR5_XENLA	316	C	0	4	MGC80045	MGC80045 protein OS=Xenopus laevis GN=MGC80045 PE=2 SV=1	133	0	1	1	0	1	0	0	1	0	0	0	0
tr|Q4KLF0|Q4KLF0_XENLA	316		0	0	fau	MGC116435 protein OS=Xenopus laevis GN=fau PE=2 SV=1	133	0	1	1	0	1	0	0	1	0	0	0	0
sp|Q283Q6|DBF4B_XENLA	317	C	0	17	dbf4b	Protein DBF4 homolog B OS=Xenopus laevis GN=dbf4b PE=1 SV=1	784	0	2	3	0	2	3	0	2	2	0	3	0
tr|B3DLM6|B3DLM6_XENLA	317		0	0	dbf4	Dbf4 protein OS=Xenopus laevis GN=dbf4 PE=2 SV=1	784	0	2	3	0	2	3	0	2	2	0	3	0
tr|Q50JE6|Q50JE6_XENLA	318	C	2	4	wrnip1	Werner helicase interacting protein 1 OS=Xenopus laevis GN=wrnip1 PE=2 SV=1	572	0	1	3	0	0	0	0	1	0	0	1	0
tr|A9ULW2|A9ULW2_XENLA	318		0	0		Uncharacterized protein OS=Xenopus laevis PE=2 SV=1	339	0	1	1	0	0	0	0	1	0	0	1	0
tr|Q7ZXE3|Q7ZXE3_XENLA	319	C	0	1	snrnp40	Prp8bp-pending-prov protein OS=Xenopus laevis GN=snrnp40 PE=2 SV=1	337	0	1	0	0	0	0	0	0	0	0	0	0
tr|Q7SY66|Q7SY66_XENLA	319		0	0	snrnp40	MGC64565 protein OS=Xenopus laevis GN=snrnp40 PE=2 SV=1	337	0	1	0	0	0	0	0	0	0	0	0	0
sp|P17507|EF1A2_XENLA	320	C	1	2	eef1ao	Elongation factor 1-alpha, oocyte form OS=Xenopus laevis GN=eef1ao PE=1 SV=1	461	2	3	3	2	3	2	3	3	4	2	3	2
sp|P13549|EF1A0_XENLA	320	C	0	44	eef1as	Elongation factor 1-alpha, somatic form OS=Xenopus laevis GN=eef1as PE=2 SV=1	462	3	4	4	3	3	3	4	4	4	3	5	4
sp|P17508|EF1A3_XENLA	320	C	0	1		Elongation factor 1-alpha, oocyte form OS=Xenopus laevis PE=1 SV=2	461	2	3	3	2	3	2	3	4	4	2	2	2
tr|Q7SYT0|Q7SYT0_XENLA	320		0	0	eef1a2	Elongation factor 1-alpha OS=Xenopus laevis GN=eef1a2 PE=2 SV=1	463	2	3	3	2	2	2	2	4	3	2	3	2
tr|A1L3K0|A1L3K0_XENLA	320	C	1	0	LOC100037028	Elongation factor 1-alpha (Fragment) OS=Xenopus laevis GN=LOC100037028 PE=2 SV=1	470	4	4	4	3	3	3	4	4	4	3	4	4
tr|Q7ZXA2|Q7ZXA2_XENLA	320		0	0	eef1a-o1	Elongation factor 1-alpha OS=Xenopus laevis GN=eef1a-o1 PE=2 SV=1	461	2	3	3	2	3	2	3	4	4	2	2	2
tr|Q640D9|Q640D9_XENLA	320		0	0	LOC494720	Elongation factor 1-alpha OS=Xenopus laevis GN=LOC494720 PE=2 SV=1	461	2	3	3	2	2	2	3	3	3	2	2	2
sp|P17506|EF1A1_XENLA	320		0	0		Elongation factor 1-alpha OS=Xenopus laevis PE=1 SV=2	463	1	1	1	1	1	1	1	1	1	1	1	1
tr|A4FVE0|A4FVE0_XENLA	320		0	0	42Sp50	Elongation factor 1-alpha OS=Xenopus laevis GN=42Sp50 PE=2 SV=1	463	1	1	1	1	1	1	1	1	1	1	1	1
sp|P51469|G3P_XENLA	321	C	0	31	gapdh	Glyceraldehyde-3-phosphate dehydrogenase OS=Xenopus laevis GN=gapdh PE=2 SV=2	333	0	2	4	2	3	3	1	4	5	1	3	3
tr|Q8AY70|Q8AY70_XENLA	321	C	6	0	gapdh	Glyceraldehyde-3-phosphate dehydrogenase OS=Xenopus laevis GN=gapdh PE=2 SV=1	333	0	2	5	2	4	4	1	5	5	1	4	3
tr|Q7ZY52|Q7ZY52_XENLA	321		0	0		Glyceraldehyde-3-phosphate dehydrogenase OS=Xenopus laevis PE=2 SV=1	333	0	2	4	2	3	3	1	4	5	1	3	3
sp|O93479|ORC4_XENLA	322	C	0	35	orc4	Origin recognition complex subunit 4 OS=Xenopus laevis GN=orc4 PE=2 SV=1	432	0	7	9	0	4	4	0	4	3	0	4	0
tr|Q3B8I2|Q3B8I2_XENLA	322		0	0	orc4	Origin recognition complex subunit 4 OS=Xenopus laevis GN=orc4 PE=2 SV=1	432	0	7	9	0	4	4	0	4	3	0	4	0
sp|P70010|NDKA1_XENLA	323	C	0	7		Nucleoside diphosphate kinase A1 OS=Xenopus laevis PE=2 SV=1	154	2	0	0	2	0	0	0	0	0	0	1	2
tr|P70071|P70071_XENLA	323		0	0	nme2	Nucleoside diphosphate kinase OS=Xenopus laevis GN=nme2 PE=2 SV=1	154	2	0	0	2	0	0	0	0	0	0	1	2
sp|P70011|NDKA2_XENLA	323		0	0		Nucleoside diphosphate kinase A2 OS=Xenopus laevis PE=2 SV=1	154	1	0	0	2	0	0	0	0	0	0	1	1
tr|Q2VPG6|Q2VPG6_XENLA	324	C	0	14		Uncharacterized protein OS=Xenopus laevis PE=2 SV=1	671	0	1	2	0	1	2	0	3	2	0	2	1
tr|Q2VPI2|Q2VPI2_XENLA	324		0	0	ewsr1	MGC132026 protein OS=Xenopus laevis GN=ewsr1 PE=2 SV=1	667	0	1	2	0	1	2	0	3	2	0	2	1
tr|Q4QR27|Q4QR27_XENLA	324		0	0	LOC733270	LOC733270 protein (Fragment) OS=Xenopus laevis GN=LOC733270 PE=2 SV=1	666	0	1	2	0	1	2	0	3	2	0	2	1
sp|Q92122|KPYM_XENLA	325		0	0	pkm	Pyruvate kinase PKM OS=Xenopus laevis GN=pkm PE=2 SV=1	527	1	2	0	2	2	0	1	2	0	1	2	2
tr|Q7ZY25|Q7ZY25_XENLA	325		0	0		Pyruvate kinase OS=Xenopus laevis PE=2 SV=1	527	0	1	0	1	1	0	0	1	0	1	2	1
tr|A1L3K2|A1L3K2_XENLA	325	C	1	15	LOC100037030	Pyruvate kinase OS=Xenopus laevis GN=LOC100037030 PE=2 SV=1	531	1	2	0	2	2	0	2	2	0	1	2	2
tr|Q6PA20|Q6PA20_XENLA	325		0	0	pklr	Pyruvate kinase OS=Xenopus laevis GN=pklr PE=2 SV=1	531	0	1	0	0	1	0	0	1	0	0	1	1
sp|P51892|DNLI1_XENLA	326	C	6	0	lig1	DNA ligase 1 OS=Xenopus laevis GN=lig1 PE=2 SV=1	1070	0	0	0	0	0	0	0	3	2	0	0	1
tr|Q5HZQ7|Q5HZQ7_XENLA	327	C	1	0	snrpd2	Uncharacterized protein OS=Xenopus laevis GN=snrpd2 PE=2 SV=1	118	0	0	0	0	1	0	0	0	0	0	0	0
sp|Q9DE46|DPOLA_XENLA	328	C	0	17	pola1	DNA polymerase alpha catalytic subunit OS=Xenopus laevis GN=pola1 PE=1 SV=1	1458	0	1	3	0	2	0	0	5	6	0	0	0
tr|B7ZRF3|B7ZRF3_XENLA	328		0	0	LOC398200	DNA polymerase OS=Xenopus laevis GN=LOC398200 PE=2 SV=1	1458	0	1	3	0	2	0	0	5	6	0	0	0
tr|B1WBE2|B1WBE2_XENLA	328		0	0	LOC398200	DNA polymerase OS=Xenopus laevis GN=LOC398200 PE=2 SV=1	1458	0	1	3	0	2	0	0	5	6	0	0	0
tr|Q9W5Z7|Q9W5Z7_XENLA	329	C	0	11	ldha	L-lactate dehydrogenase OS=Xenopus laevis GN=ldha PE=2 SV=1	332	1	0	0	2	0	2	1	1	0	1	1	2
tr|Q9W7M7|Q9W7M7_XENLA	329		0	0	ldha	L-lactate dehydrogenase OS=Xenopus laevis GN=ldha PE=2 SV=1	332	1	0	0	2	0	2	1	1	0	1	1	2
sp|Q9YHU0|CTBP1_XENLA	330	C	0	6	ctbp1	C-terminal-binding protein 1 OS=Xenopus laevis GN=ctbp1 PE=2 SV=1	440	0	0	1	0	1	1	0	1	1	0	0	1
sp|Q9W758|CTBP2_XENLA	330		0	0	ctbp2	C-terminal-binding protein 2 OS=Xenopus laevis GN=ctbp2 PE=1 SV=1	437	0	0	1	0	1	1	0	1	1	0	0	1
tr|Q5XHH5|Q5XHH5_XENLA	330		0	0	LOC494997	LOC494997 protein OS=Xenopus laevis GN=LOC494997 PE=2 SV=1	430	0	0	1	0	1	1	0	1	1	0	0	1
tr|A0AUT7|A0AUT7_XENLA	331	C	0	2	LOC495409	LOC495409 protein (Fragment) OS=Xenopus laevis GN=LOC495409 PE=2 SV=1	892	0	0	1	0	0	0	0	0	1	0	0	0
tr|Q5U4Z5|Q5U4Z5_XENLA	331		0	0	LOC495409	LOC495409 protein (Fragment) OS=Xenopus laevis GN=LOC495409 PE=2 SV=1	794	0	0	1	0	0	0	0	0	1	0	0	0
sp|Q6IRQ4|RBMX_XENLA	332	C	22	0	rbmx	RNA-binding motif protein, X chromosome OS=Xenopus laevis GN=rbmx PE=2 SV=1	370	0	2	3	1	2	3	0	3	3	0	3	2
sp|Q7ZXB8|PAB2B_XENLA	333	C	4	9	pabpn1-b	Polyadenylate-binding protein 2-B OS=Xenopus laevis GN=pabpn1-b PE=2 SV=1	295	0	2	2	1	1	1	1	1	0	0	2	2
sp|Q9DDY9|PAB2A_XENLA	333		0	0	pabpn1-a	Polyadenylate-binding protein 2-A OS=Xenopus laevis GN=pabpn1-a PE=2 SV=1	296	0	1	1	1	1	1	1	1	0	0	1	1
sp|Q6GLZ8|SNR27_XENLA	334	C	4	0	snrnp27	U4/U6.U5 small nuclear ribonucleoprotein 27 kDa protein OS=Xenopus laevis GN=snrnp27 PE=2 SV=1	158	0	0	2	0	1	0	0	1	0	0	0	0
tr|A1L3N8|A1L3N8_XENLA	335	C	1	1	LOC100037142	Fructose-bisphosphate aldolase OS=Xenopus laevis GN=LOC100037142 PE=2 SV=1	364	1	0	0	0	0	0	0	1	0	0	0	0
tr|O12975|O12975_XENLA	335		0	0	aldoa	Fructose-bisphosphate aldolase OS=Xenopus laevis GN=aldoa PE=2 SV=1	364	0	0	0	0	0	0	0	1	0	0	0	0
tr|Q5XGT3|Q5XGT3_XENLA	335		0	0	MGC64482	Fructose-bisphosphate aldolase OS=Xenopus laevis GN=MGC64482 PE=2 SV=1	364	0	0	0	0	0	0	0	1	0	0	0	0
tr|Q3KPP7|Q3KPP7_XENLA	335		0	0	MGC64482	Fructose-bisphosphate aldolase OS=Xenopus laevis GN=MGC64482 PE=2 SV=1	364	0	0	0	0	0	0	0	1	0	0	0	0
tr|Q7SYU5|Q7SYU5_XENLA	335		0	0		MGC64482 protein OS=Xenopus laevis PE=2 SV=1	279	0	0	0	0	0	0	0	1	0	0	0	0
tr|Q7LZE9|Q7LZE9_XENLA	335		0	0		Fructose-bisphosphate aldolase A (Fragments) OS=Xenopus laevis PE=4 SV=1	83	0	0	0	0	0	0	0	1	0	0	0	0
tr|B3DLS4|B3DLS4_XENLA	336	C	5	0	LOC100174807	LOC100174807 protein (Fragment) OS=Xenopus laevis GN=LOC100174807 PE=2 SV=1	571	0	2	2	0	0	1	0	0	0	0	0	0
tr|Q6INS8|Q6INS8_XENLA	337	C	2	0	gmeb1	MGC81052 protein OS=Xenopus laevis GN=gmeb1 PE=2 SV=1	502	0	0	1	0	0	0	0	0	1	0	0	0
tr|Q6GP41|Q6GP41_XENLA	338	C	0	9	MGC80700	MGC80700 protein OS=Xenopus laevis GN=MGC80700 PE=2 SV=1	160	0	1	2	0	1	0	0	1	1	0	2	1
tr|Q7SZB3|Q7SZB3_XENLA	338		0	0	rpl21	MGC64285 protein OS=Xenopus laevis GN=rpl21 PE=2 SV=1	160	0	1	2	0	1	0	0	1	1	0	2	1
sp|P49628|RL21_XENLA	338		0	0	rpl21	60S ribosomal protein L21 (Fragment) OS=Xenopus laevis GN=rpl21 PE=2 SV=1	33	0	0	1	0	0	0	0	0	0	0	0	0
sp|P49393|RS13_XENLA	339	C	0	13	rps13	40S ribosomal protein S13 OS=Xenopus laevis GN=rps13 PE=3 SV=2	151	0	1	1	1	1	1	1	1	1	1	2	2
tr|Q7SZT6|Q7SZT6_XENLA	339		0	0	rps13	Rps13-prov protein OS=Xenopus laevis GN=rps13 PE=2 SV=1	151	0	1	1	1	1	1	1	1	1	1	2	2
tr|Q0IH84|Q0IH84_XENLA	340	C	1	0	rp9	MGC154533 protein OS=Xenopus laevis GN=rp9 PE=2 SV=1	226	0	0	0	0	0	0	0	0	0	0	1	0
tr|Q0IH31|Q0IH31_XENLA	341	C	6	0	snrpg	MGC154809 protein OS=Xenopus laevis GN=snrpg PE=2 SV=1	76	0	1	1	0	1	1	0	0	1	0	1	0
tr|Q8AVI3|Q8AVI3_XENLA	342	C	7	0	rplp0	60S acidic ribosomal protein P0 OS=Xenopus laevis GN=rplp0 PE=2 SV=1	315	0	0	2	0	0	1	0	0	1	0	2	1
tr|Q7ZWS8|Q7ZWS8_XENLA	343	C	1	0	tagln2	Transgelin OS=Xenopus laevis GN=tagln2 PE=2 SV=1	197	0	0	0	0	0	0	1	0	0	0	0	0
tr|Q71QG2|Q71QG2_XENLA	344	C	13	0		PIAS OS=Xenopus laevis PE=2 SV=1	499	0	6	9	0	6	6	0	5	6	0	6	3
tr|Q640I7|Q640I7_XENLA	344	C	7	34	pias4	LOC494663 protein OS=Xenopus laevis GN=pias4 PE=2 SV=1	501	0	6	7	0	7	4	0	5	5	0	5	2
tr|Q7T0R9|Q7T0R9_XENLA	345	C	0	13	rps2	Rps2e protein OS=Xenopus laevis GN=rps2 PE=2 SV=1	281	0	2	2	1	1	1	0	2	1	0	2	1
tr|A2BDB1|A2BDB1_XENLA	345		0	0	LOC100037089	LOC100037089 protein (Fragment) OS=Xenopus laevis GN=LOC100037089 PE=2 SV=1	293	0	2	2	1	1	1	0	2	1	0	2	1
tr|A2BD96|A2BD96_XENLA	345		0	0	rps2e	Rps2e protein OS=Xenopus laevis GN=rps2e PE=2 SV=1	358	0	1	1	0	0	0	0	1	0	0	1	0
tr|Q5XGV7|Q5XGV7_XENLA	346	C	3	0	ythdc1	LOC495129 protein OS=Xenopus laevis GN=ythdc1 PE=2 SV=1	704	0	0	0	0	0	0	0	0	1	0	2	0
sp|B6CHA3|UHRF1_XENLA	347	C	2	48	uhrf1	E3 ubiquitin-protein ligase UHRF1 OS=Xenopus laevis GN=uhrf1 PE=2 SV=1	772	0	4	11	0	4	4	0	7	7	0	8	5
tr|Q52L17|Q52L17_XENLA	347		0	0	LOC432234	LOC432234 protein (Fragment) OS=Xenopus laevis GN=LOC432234 PE=2 SV=1	598	0	4	10	0	4	4	0	7	6	0	8	5
tr|Q2TAH0|Q2TAH0_XENLA	347		0	0	LOC432234	LOC432234 protein (Fragment) OS=Xenopus laevis GN=LOC432234 PE=2 SV=1	656	0	4	10	0	4	4	0	7	6	0	8	5
tr|Q6IP39|Q6IP39_XENLA	347		0	0	LOC432234	LOC432234 protein (Fragment) OS=Xenopus laevis GN=LOC432234 PE=2 SV=1	597	0	4	10	0	4	4	0	7	6	0	8	5
sp|Q8UVR5|BAZ1A_XENLA	348	C	13	0	baz1a	Bromodomain adjacent to zinc finger domain protein 1A (Fragment) OS=Xenopus laevis GN=baz1a PE=2 SV=1	627	0	2	3	0	3	2	0	1	2	0	0	0
tr|Q91711|Q91711_XENLA	349	C	0	1		Calreticulin (Fragment) OS=Xenopus laevis PE=2 SV=1	343	0	0	0	0	0	0	1	0	0	0	0	0
tr|Q91710|Q91710_XENLA	349		0	0		Calreticulin (Fragment) OS=Xenopus laevis PE=2 SV=1	411	0	0	0	0	0	0	1	0	0	0	0	0
tr|Q7ZXY3|Q7ZXY3_XENLA	349		0	0	calr	Crc protein OS=Xenopus laevis GN=calr PE=2 SV=1	418	0	0	0	0	0	0	1	0	0	0	0	0
tr|Q7ZWU8|Q7ZWU8_XENLA	349		0	0	calr	Calr protein OS=Xenopus laevis GN=calr PE=2 SV=1	413	0	0	0	0	0	0	1	0	0	0	0	0
tr|Q66KU5|Q66KU5_XENLA	350	C	1	0	rpl36a	MGC85428 protein OS=Xenopus laevis GN=rpl36a PE=2 SV=1	106	0	0	1	0	0	0	0	0	0	0	0	0
tr|Q4QR44|Q4QR44_XENLA	351	C	21	0	rps15a	MGC114789 protein OS=Xenopus laevis GN=rps15a PE=2 SV=1	130	0	2	2	0	3	3	0	2	4	0	3	2
tr|Q5XH18|Q5XH18_XENLA	352	C	0	1	LOC495090	LOC495090 protein OS=Xenopus laevis GN=LOC495090 PE=2 SV=1	428	0	0	0	0	0	0	0	0	1	0	0	0
tr|Q801N9|Q801N9_XENLA	352		0	0	gcnt1	Gcnt1 protein OS=Xenopus laevis GN=gcnt1 PE=2 SV=1	428	0	0	0	0	0	0	0	0	1	0	0	0
sp|P70040|FEN1A_XENLA	353	C	7	15	fen1-a	Flap endonuclease 1-A OS=Xenopus laevis GN=fen1-a PE=1 SV=1	382	0	2	3	0	0	3	0	5	3	0	3	3
sp|P70054|FEN1B_XENLA	353		0	0	fen1-b	Flap endonuclease 1-B OS=Xenopus laevis GN=fen1-b PE=1 SV=1	382	0	1	2	0	0	3	0	4	2	0	1	2
tr|Q66KW5|Q66KW5_XENLA	354	C	4	0	rpl32	MGC85374 protein OS=Xenopus laevis GN=rpl32 PE=2 SV=1	135	0	0	1	0	1	0	0	1	1	0	0	0
sp|Q7ZYS1|RL19_XENLA	355	C	4	0	rpl19	60S ribosomal protein L19 OS=Xenopus laevis GN=rpl19 PE=2 SV=1	197	0	1	0	0	2	0	0	0	0	0	1	0
tr|Q6IP72|Q6IP72_XENLA	356	C	1	0	cab39	MGC78903 protein OS=Xenopus laevis GN=cab39 PE=2 SV=1	341	0	0	0	0	0	0	0	0	1	0	0	0
tr|Q8AVU3|Q8AVU3_XENLA	357	C	0	1		MGC52825 protein OS=Xenopus laevis PE=2 SV=1	212	0	1	2	0	1	1	0	1	1	0	1	1
tr|Q32NS7|Q32NS7_XENLA	357		0	0	hmgb2	MGC52825 protein OS=Xenopus laevis GN=hmgb2 PE=2 SV=1	211	0	1	2	0	1	1	0	1	1	0	1	1
tr|Q7ZXK5|Q7ZXK5_XENLA	357	C	9	10	MGC52578	MGC52578 protein OS=Xenopus laevis GN=MGC52578 PE=2 SV=1	212	0	3	3	0	3	2	0	2	2	0	2	2
tr|Q91764|Q91764_XENLA	357		0	0		HMG-X protein OS=Xenopus laevis PE=2 SV=1	212	0	2	1	0	2	1	0	1	1	0	1	1
tr|Q6DD57|Q6DD57_XENLA	358	C	0	4	hnrnph1	Hnrph2 protein OS=Xenopus laevis GN=hnrnph1 PE=2 SV=1	456	1	0	0	1	0	0	1	0	0	1	0	0
tr|Q6IRC9|Q6IRC9_XENLA	358		0	0	hnrnph1	MGC78776 protein OS=Xenopus laevis GN=hnrnph1 PE=2 SV=1	441	1	0	0	1	0	0	1	0	0	1	0	0
tr|Q6DFB2|Q6DFB2_XENLA	359	C	5	0	ercc4	Ercc4-prov protein OS=Xenopus laevis GN=ercc4 PE=2 SV=1	897	0	0	2	0	1	0	0	0	0	0	2	0
tr|A0JMW3|A0JMW3_XENLA	360	C	10	0	ints7	LOC100036786 protein OS=Xenopus laevis GN=ints7 PE=2 SV=1	982	0	1	4	0	1	0	0	1	1	0	2	0
tr|Q6GNF4|Q6GNF4_XENLA	361	C	3	0	rps17	MGC82841 protein OS=Xenopus laevis GN=rps17 PE=2 SV=1	135	0	0	0	0	1	1	0	0	0	0	1	0
tr|Q6P7I8|Q6P7I8_XENLA	362	C	1	0	pls3	MGC68681 protein OS=Xenopus laevis GN=pls3 PE=2 SV=1	629	0	0	0	0	0	0	0	0	0	0	1	0
tr|Q4QQY4|Q4QQY4_XENLA	363	C	5	0	LOC733278	LOC733278 protein (Fragment) OS=Xenopus laevis GN=LOC733278 PE=2 SV=1	544	0	0	1	0	1	0	0	1	1	0	1	0
tr|A9UM31|A9UM31_XENLA	364	C	3	0	LOC100137683	LOC100137683 protein (Fragment) OS=Xenopus laevis GN=LOC100137683 PE=2 SV=1	590	0	0	1	0	0	1	0	0	1	0	0	0
tr|Q8JHD8|Q8JHD8_XENLA	365	C	0	4	Hus1	Checkpoint protein Hus1 OS=Xenopus laevis GN=Hus1 PE=2 SV=1	282	0	0	1	0	1	0	0	0	0	0	2	0
tr|Q7ZTA4|Q7ZTA4_XENLA	365		0	0	hus1	Hus1 protein OS=Xenopus laevis GN=hus1 PE=2 SV=1	282	0	0	1	0	1	0	0	0	0	0	2	0
sp|P55861|MCM2_XENLA	366	C	2	0	mcm2	DNA replication licensing factor mcm2 OS=Xenopus laevis GN=mcm2 PE=1 SV=2	886	0	1	1	0	0	0	0	0	0	0	0	0
tr|Q2VPN2|Q2VPN2_XENLA	367	C	0	1	snrpb	Small nuclear ribonucleoprotein-associated protein OS=Xenopus laevis GN=snrpb PE=2 SV=1	234	0	0	1	0	0	0	0	0	0	0	0	0
tr|Q0IHK1|Q0IHK1_XENLA	367		0	0	snrpn	Small nuclear ribonucleoprotein-associated protein OS=Xenopus laevis GN=snrpn PE=2 SV=1	236	0	0	1	0	0	0	0	0	0	0	0	0
tr|Q8AVT2|Q8AVT2_XENLA	367		0	0		Small nuclear ribonucleoprotein-associated protein OS=Xenopus laevis PE=2 SV=1	236	0	0	1	0	0	0	0	0	0	0	0	0
tr|Q58E78|Q58E78_XENLA	368	C	5	1	MGC85066	MGC85066 protein OS=Xenopus laevis GN=MGC85066 PE=2 SV=1	279	0	0	2	0	1	1	0	1	0	0	1	0
tr|Q8AVY5|Q8AVY5_XENLA	368		0	0	creb1	Creb1-prov protein OS=Xenopus laevis GN=creb1 PE=2 SV=1	324	0	0	1	0	0	0	0	0	0	0	0	0
tr|Q5HZP0|Q5HZP0_XENLA	368		0	0	atf1	LOC496344 protein OS=Xenopus laevis GN=atf1 PE=2 SV=1	280	0	0	1	0	0	0	0	0	0	0	0	0
tr|Q05BI7|Q05BI7_XENLA	369	C	0	3	MGC64447	MGC64447 protein OS=Xenopus laevis GN=MGC64447 PE=2 SV=1	255	0	0	0	1	0	0	0	0	0	0	1	1
tr|Q7SY83|Q7SY83_XENLA	369		0	0		MGC64447 protein OS=Xenopus laevis PE=2 SV=1	272	0	0	0	1	0	0	0	0	0	0	1	1
tr|Q6GM69|Q6GM69_XENLA	370	C	7	8		Uncharacterized protein OS=Xenopus laevis PE=2 SV=1	326	0	2	2	0	2	1	0	2	2	0	2	2
tr|Q7ZYE9|Q7ZYE9_XENLA	370	C	6	0	hnrnpab	Hnrpab-prov protein OS=Xenopus laevis GN=hnrnpab PE=1 SV=1	324	0	1	2	0	2	1	0	2	2	0	2	2
tr|Q98UD3|Q98UD3_XENLA	370		0	0		CArG-binding factor A (Fragment) OS=Xenopus laevis PE=2 SV=1	131	0	1	1	0	1	1	0	1	1	0	1	1
##tr|Q801M5|Q801M5_XENLA	371	C	1	0	##col1a2	##Col1a2-prov protein OS=Xenopus laevis GN=col1a2 PE=2 SV=1	1346	0	0	1	0	0	0	0	0	0	0	0	0
##sp|Q66J74|TFP11_XENLA	372	C	1	0	##tfip11	##Tuftelin-interacting protein 11 OS=Xenopus laevis GN=tfip11 PE=2 SV=1	824	0	0	1	0	0	0	0	0	0	0	0	0
tr|Q7ZWR6|Q7ZWR6_XENLA	373	C	4	0	atp5b	ATP synthase subunit beta OS=Xenopus laevis GN=atp5b PE=2 SV=1	525	0	0	0	0	0	1	2	0	0	0	0	1
tr|Q8AVW0|Q8AVW0_XENLA	374	C	11	0	rpl12	Rpl12-prov protein OS=Xenopus laevis GN=rpl12 PE=2 SV=1	165	0	1	1	1	1	1	1	1	1	1	1	1
##sp|Q5XG16|SLAIL_XENLA	375	C	1	0		##SLAIN motif-containing protein-like OS=Xenopus laevis PE=2 SV=1	562	0	0	0	0	0	0	0	0	0	0	0	1
tr|Q6GNP5|Q6GNP5_XENLA	376	C	3	0	zc3h10	MGC80969 protein OS=Xenopus laevis GN=zc3h10 PE=2 SV=1	409	0	0	1	0	0	0	0	1	0	0	1	0
##sp|P50143|TCPG_XENLA	377	C	1	0	##cct3	##T-complex protein 1 subunit gamma OS=Xenopus laevis GN=cct3 PE=2 SV=2	547	0	0	1	0	0	0	0	0	0	0	0	0
tr|Q7SYZ0|Q7SYZ0_XENLA	378	C	24	0	vrk1	Vrk1-prov protein OS=Xenopus laevis GN=vrk1 PE=2 SV=1	144	0	3	4	0	2	2	0	4	4	0	3	2
tr|Q5EWX9|Q5EWX9_XENLA	379		0	0		Nuclear pore protein pom121 OS=Xenopus laevis PE=2 SV=1	1050	0	0	1	0	0	0	0	0	0	0	0	0
tr|Q4KLR3|Q4KLR3_XENLA	379	C	4	1	MGC115599	MGC115599 protein OS=Xenopus laevis GN=MGC115599 PE=2 SV=1	902	0	0	1	0	1	1	0	0	1	0	1	0
tr|Q7ZTA5|Q7ZTA5_XENLA	380	C	0	2	rad17	Rad17 OS=Xenopus laevis GN=rad17 PE=2 SV=1	674	0	0	0	0	0	0	0	0	1	0	1	0
tr|Q6INE0|Q6INE0_XENLA	380		0	0	rad17	Rad17 protein OS=Xenopus laevis GN=rad17 PE=2 SV=1	674	0	0	0	0	0	0	0	0	1	0	1	0
tr|Q7ZZU6|Q7ZZU6_XENLA	380		0	0	Rad17	RFC-like DNA checkpoint protein Rad17 OS=Xenopus laevis GN=Rad17 PE=2 SV=1	674	0	0	0	0	0	0	0	0	1	0	1	0
tr|Q6IP84|Q6IP84_XENLA	381	C	5	0	polr1c	MGC78824 protein OS=Xenopus laevis GN=polr1c PE=2 SV=1	347	0	1	2	0	0	0	0	0	1	0	1	0
tr|Q7T0S3|Q7T0S3_XENLA	382	C	4	0	atp6ap2	Atp6ap2-prov protein OS=Xenopus laevis GN=atp6ap2 PE=1 SV=1	348	0	0	1	0	1	0	0	1	1	0	0	0
tr|Q8AVV9|Q8AVV9_XENLA	383	C	0	4	pcbp3	Pcbp2b protein OS=Xenopus laevis GN=pcbp3 PE=2 SV=1	353	1	0	0	1	0	1	0	0	0	1	0	0
tr|Q9W702|Q9W702_XENLA	383		0	0	pcbp2	HnRNP-E2 protein OS=Xenopus laevis GN=pcbp2 PE=2 SV=1	353	1	0	0	1	0	1	0	0	0	1	0	0
tr|Q7M556|Q7M556_XENLA	383		0	0	hnRNP-E2	HnRNP-E2 b OS=Xenopus laevis GN=hnRNP-E2 copy b PE=2 SV=1	319	1	0	0	1	0	1	0	0	0	1	0	0
tr|Q6GLW4|Q6GLW4_XENLA	383		0	0	MGC84166	MGC84166 protein OS=Xenopus laevis GN=MGC84166 PE=2 SV=1	225	1	0	0	1	0	1	0	0	0	1	0	0
tr|A2RV79|A2RV79_XENLA	383		0	0	pcbp1	LOC100037147 protein OS=Xenopus laevis GN=pcbp1 PE=2 SV=1	221	1	0	0	1	0	1	0	0	0	1	0	0
tr|Q5XH78|Q5XH78_XENLA	383		0	0	pcbp2	Pcbp2 protein OS=Xenopus laevis GN=pcbp2 PE=2 SV=1	353	1	0	0	1	0	1	0	0	0	1	0	0
tr|Q6NTT2|Q6NTT2_XENLA	384	C	8	0	rps18	MGC82306 protein OS=Xenopus laevis GN=rps18 PE=2 SV=1	152	0	1	1	0	1	1	0	1	1	0	2	0
sp|P55862|MCM5A_XENLA	385	C	1	1	mcm5-a	DNA replication licensing factor mcm5-A OS=Xenopus laevis GN=mcm5-a PE=1 SV=2	735	0	0	2	0	0	0	0	0	0	0	0	0
sp|Q6PCI7|MCM5B_XENLA	385		0	0	mcm5-b	DNA replication licensing factor mcm5-B OS=Xenopus laevis GN=mcm5-b PE=2 SV=1	735	0	0	1	0	0	0	0	0	0	0	0	0
tr|A2BDC1|A2BDC1_XENLA	386	C	0	23	LOC494754	LOC494754 protein (Fragment) OS=Xenopus laevis GN=LOC494754 PE=2 SV=1	796	1	2	2	1	3	3	1	2	2	1	3	2
tr|Q63ZQ5|Q63ZQ5_XENLA	386		0	0	LOC494754	LOC494754 protein (Fragment) OS=Xenopus laevis GN=LOC494754 PE=2 SV=1	796	1	2	2	1	3	3	1	2	2	1	3	2
tr|B2GTX8|B2GTX8_XENLA	386		0	0	LOC494754	LOC494754 protein OS=Xenopus laevis GN=LOC494754 PE=2 SV=1	774	1	2	2	1	3	3	1	2	2	1	3	2
tr|Q4V7Y5|Q4V7Y5_XENLA	386		0	0	LOC494754	LOC494754 protein (Fragment) OS=Xenopus laevis GN=LOC494754 PE=2 SV=1	798	1	2	2	1	3	3	1	2	2	1	3	2
##tr|A2BDC1|A2BDC1_XENLA	386		0	0	##LOC494754	##LOC494754 protein (Fragment) OS=Xenopus laevis GN=LOC494754 PE=2 SV=1	796	1	2	2	1	3	3	1	2	2	1	2	2
##tr|Q63ZQ5|Q63ZQ5_XENLA	386		0	0	##LOC494754	##LOC494754 protein (Fragment) OS=Xenopus laevis GN=LOC494754 PE=2 SV=1	796	1	2	2	1	3	3	1	2	2	1	2	2
##tr|B2GTX8|B2GTX8_XENLA	386		0	0	##LOC494754	##LOC494754 protein OS=Xenopus laevis GN=LOC494754 PE=2 SV=1	774	1	2	2	1	3	3	1	2	2	1	2	2
##tr|Q4V7Y5|Q4V7Y5_XENLA	386		0	0	##LOC494754	##LOC494754 protein (Fragment) OS=Xenopus laevis GN=LOC494754 PE=2 SV=1	798	1	2	2	1	3	3	1	2	2	1	2	2
tr|Q52L29|Q52L29_XENLA	386		0	0	srrm1	LOC445881 protein OS=Xenopus laevis GN=srrm1 PE=2 SV=1	872	0	0	0	0	0	0	0	0	0	0	1	0
tr|Q2VPI0|Q2VPI0_XENLA	386		0	0	LOC494754	LOC494754 protein (Fragment) OS=Xenopus laevis GN=LOC494754 PE=2 SV=1	796	0	0	0	0	0	0	0	0	0	0	1	0
tr|Q6DD56|Q6DD56_XENLA	386		0	0	LOC445881	LOC445881 protein (Fragment) OS=Xenopus laevis GN=LOC445881 PE=2 SV=1	734	0	0	0	0	0	0	0	0	0	0	1	0
tr|Q6PAX0|Q6PAX0_XENLA	387	C	8	0	brip1	MGC68622 protein OS=Xenopus laevis GN=brip1 PE=2 SV=1	713	0	0	1	0	1	0	0	1	3	0	2	0
sp|Q01173|TPM1_XENLA	388	C	0	1	tpm1	Tropomyosin alpha-1 chain OS=Xenopus laevis GN=tpm1 PE=2 SV=1	284	0	0	0	1	0	0	0	0	0	0	0	0
tr|Q91866|Q91866_XENLA	388		0	0	Tm7	Tm7 protein OS=Xenopus laevis GN=Tm7 PE=2 SV=2	248	0	0	0	1	0	0	0	0	0	0	0	0
tr|Q7SZ31|Q7SZ31_XENLA	388		0	0	tpm2	MGC64279 protein OS=Xenopus laevis GN=tpm2 PE=2 SV=1	284	0	0	0	1	0	0	0	0	0	0	0	0
tr|Q91706|Q91706_XENLA	388		0	0	tpm2	Fast skeletal muscle beta-tropomyosin OS=Xenopus laevis GN=tpm2 PE=2 SV=1	284	0	0	0	1	0	0	0	0	0	0	0	0
tr|O73681|O73681_XENLA	388		0	0	TM	Alpha-tropomyosin OS=Xenopus laevis GN=TM PE=2 SV=1	248	0	0	0	1	0	0	0	0	0	0	0	0
tr|Q6IRB0|Q6IRB0_XENLA	388		0	0	LOC398674	LOC398674 protein (Fragment) OS=Xenopus laevis GN=LOC398674 PE=2 SV=1	298	0	0	0	1	0	0	0	0	0	0	0	0
tr|Q7SXS3|Q7SXS3_XENLA	388		0	0	LOC398674	LOC398674 protein (Fragment) OS=Xenopus laevis GN=LOC398674 PE=2 SV=1	302	0	0	0	1	0	0	0	0	0	0	0	0
tr|Q6IP24|Q6IP24_XENLA	388		0	0		Uncharacterized protein OS=Xenopus laevis PE=2 SV=1	284	0	0	0	1	0	0	0	0	0	0	0	0
tr|Q6IRA2|Q6IRA2_XENLA	388		0	0	XTm4	XTm4 protein OS=Xenopus laevis GN=XTm4 PE=2 SV=1	152	0	0	0	1	0	0	0	0	0	0	0	0
tr|Q91707|Q91707_XENLA	388		0	0	tpm2	Smooth muscle beta-tropomyosin OS=Xenopus laevis GN=tpm2 PE=2 SV=1	284	0	0	0	1	0	0	0	0	0	0	0	0
tr|Q7SYY4|Q7SYY4_XENLA	388		0	0	tpm4	MGC64401 protein OS=Xenopus laevis GN=tpm4 PE=2 SV=1	284	0	0	0	1	0	0	0	0	0	0	0	0
tr|Q7ZY45|Q7ZY45_XENLA	388		0	0	TPM3	TPM3 protein (Fragment) OS=Xenopus laevis GN=TPM3 PE=2 SV=1	255	0	0	0	1	0	0	0	0	0	0	0	0
tr|Q91865|Q91865_XENLA	388		0	0	TM-4	Non-muscle tropomyosin OS=Xenopus laevis GN=TM-4 PE=2 SV=1	248	0	0	0	1	0	0	0	0	0	0	0	0
tr|Q6PA57|Q6PA57_XENLA	388		0	0	MGC68479	MGC68479 protein OS=Xenopus laevis GN=MGC68479 PE=2 SV=1	245	0	0	0	1	0	0	0	0	0	0	0	0
tr|Q91864|Q91864_XENLA	388		0	0	XTm4	Tropomyosin OS=Xenopus laevis GN=XTm4 PE=2 SV=1	248	0	0	0	1	0	0	0	0	0	0	0	0
tr|Q7ZYU5|Q7ZYU5_XENLA	388		0	0	tpm2	LOC398674 protein OS=Xenopus laevis GN=tpm2 PE=2 SV=1	284	0	0	0	1	0	0	0	0	0	0	0	0
tr|Q91726|Q91726_XENLA	388		0	0	TM-4	Cardiac tropomyosin OS=Xenopus laevis GN=TM-4 PE=2 SV=1	284	0	0	0	1	0	0	0	0	0	0	0	0
tr|Q6PF72|Q6PF72_XENLA	388		0	0	tpm4	Tm-4 protein OS=Xenopus laevis GN=tpm4 PE=2 SV=1	248	0	0	0	1	0	0	0	0	0	0	0	0
tr|Q6GNE5|Q6GNE5_XENLA	389	C	1	0	med21	MGC82859 protein OS=Xenopus laevis GN=med21 PE=2 SV=1	33	0	0	1	0	0	0	0	0	0	0	0	0
tr|Q6AX75|Q6AX75_XENLA	390	C	0	2	LOC398447	LOC398447 protein (Fragment) OS=Xenopus laevis GN=LOC398447 PE=2 SV=1	667	0	0	1	0	0	0	0	0	1	0	0	0
tr|Q7ZYB9|Q7ZYB9_XENLA	390		0	0	LOC398447	LOC398447 protein (Fragment) OS=Xenopus laevis GN=LOC398447 PE=2 SV=1	665	0	0	1	0	0	0	0	0	1	0	0	0
tr|A5PKP1|A5PKP1_XENLA	390		0	0	LOC100101293	LOC100101293 protein (Fragment) OS=Xenopus laevis GN=LOC100101293 PE=2 SV=1	655	0	0	1	0	0	0	0	0	1	0	0	0
tr|A0JMT4|A0JMT4_XENLA	390		0	0	LOC398447	LOC398447 protein (Fragment) OS=Xenopus laevis GN=LOC398447 PE=2 SV=1	687	0	0	1	0	0	0	0	0	1	0	0	0
tr|Q6NRM5|Q6NRM5_XENLA	391	C	6	0	slx4ip	MGC83686 protein OS=Xenopus laevis GN=slx4ip PE=2 SV=1	267	0	2	0	0	2	0	0	2	0	0	0	0
sp|Q6GLY5|ASUN_XENLA	392	C	5	0	asun	Protein asunder homolog OS=Xenopus laevis GN=asun PE=2 SV=1	715	0	0	1	0	1	1	0	1	1	0	0	0
sp|Q7SZB4|RL37A_XENLA	393	C	4	0	rpl37a	60S ribosomal protein L37a OS=Xenopus laevis GN=rpl37a PE=3 SV=3	92	0	0	1	0	1	0	0	0	1	0	1	0
sp|Q6DJL0|TOX4A_XENLA	394	C	0	7	tox4-a	TOX high mobility group box family member 4-A OS=Xenopus laevis GN=tox4-a PE=2 SV=1	597	0	1	1	0	1	1	0	1	1	0	1	0
sp|Q6IRR0|TOX4B_XENLA	394		0	0	tox4-b	TOX high mobility group box family member 4-B OS=Xenopus laevis GN=tox4-b PE=2 SV=1	594	0	1	1	0	1	1	0	1	1	0	1	0
tr|Q6DJE3|Q6DJE3_XENLA	394		0	0	tox2	MGC84449 protein OS=Xenopus laevis GN=tox2 PE=2 SV=1	465	0	1	1	0	1	1	0	1	1	0	1	0
tr|Q7SZ26|Q7SZ26_XENLA	395	C	0	1	ppib	Peptidyl-prolyl cis-trans isomerase OS=Xenopus laevis GN=ppib PE=2 SV=1	216	0	0	1	0	0	0	0	0	0	0	0	0
tr|Q5XGR3|Q5XGR3_XENLA	395		0	0	LOC495270	Peptidyl-prolyl cis-trans isomerase OS=Xenopus laevis GN=LOC495270 PE=2 SV=1	216	0	0	1	0	0	0	0	0	0	0	0	0
tr|Q98UE5|Q98UE5_XENLA	395		0	0		Peptidyl-prolyl cis-trans isomerase (Fragment) OS=Xenopus laevis PE=2 SV=1	104	0	0	1	0	0	0	0	0	0	0	0	0
tr|Q3KPU5|Q3KPU5_XENLA	395		0	0	LOC733374	Peptidyl-prolyl cis-trans isomerase (Fragment) OS=Xenopus laevis GN=LOC733374 PE=2 SV=1	215	0	0	1	0	0	0	0	0	0	0	0	0
tr|Q4QR35|Q4QR35_XENLA	396	C	0	7	ube2l3	LOC446231 protein OS=Xenopus laevis GN=ube2l3 PE=2 SV=1	154	0	1	0	0	1	0	1	1	1	0	1	1
tr|Q6AZI4|Q6AZI4_XENLA	396		0	0	LOC446231	LOC446231 protein (Fragment) OS=Xenopus laevis GN=LOC446231 PE=2 SV=1	153	0	1	0	0	1	0	1	1	1	0	1	1
sp|O13161|VEGTB_XENLA	397	C	0	3	vegt-b	T-box protein VegT-B OS=Xenopus laevis GN=vegt-b PE=2 SV=1	455	0	0	1	0	0	0	0	1	0	0	1	0
sp|P87377|VEGTA_XENLA	397		0	0	vegt-a	T-box protein VegT-A OS=Xenopus laevis GN=vegt-a PE=1 SV=2	455	0	0	1	0	0	0	0	1	0	0	1	0
sp|Q32N90|MBTD1_XENLA	398	C	1	0	mbtd1	MBT domain-containing protein 1 OS=Xenopus laevis GN=mbtd1 PE=2 SV=1	621	0	0	1	0	0	0	0	0	0	0	0	0
tr|Q6GR19|Q6GR19_XENLA	399	C	1	0	mlf2	MGC81350 protein OS=Xenopus laevis GN=mlf2 PE=2 SV=1	242	0	1	0	0	0	0	0	0	0	0	0	0
tr|Q66KX3|Q66KX3_XENLA	400	C	4	0	rpl23a	MGC85348 protein OS=Xenopus laevis GN=rpl23a PE=2 SV=1	155	0	1	1	1	0	0	0	0	1	0	0	0
##tr|O13099|O13099_XENLA	401	C	0	1	##NF-M(2)	##Middle molecular weight neurofilament protein NF-M(2) OS=Xenopus laevis GN=NF-M(2) PE=2 SV=1	913	0	0	0	0	0	0	0	0	0	0	1	0
##tr|Q801T3|Q801T3_XENLA	401		0	0	##LOC397994	##LOC397994 protein (Fragment) OS=Xenopus laevis GN=LOC397994 PE=2 SV=1	716	0	0	0	0	0	0	0	0	0	0	1	0
##tr|Q6DCC0|Q6DCC0_XENLA	401		0	0	##nefm	##LOC397995 protein OS=Xenopus laevis GN=nefm PE=2 SV=1	913	0	0	0	0	0	0	0	0	0	0	1	0
##tr|O13098|O13098_XENLA	401		0	0	##nefm	##Middle molecular weight neurofilament protein NF-M(1) OS=Xenopus laevis GN=nefm PE=2 SV=1	897	0	0	0	0	0	0	0	0	0	0	1	0
##tr|Q6GLM0|Q6GLM0_XENLA	401		0	0	##LOC397994	##LOC397994 protein OS=Xenopus laevis GN=LOC397994 PE=2 SV=1	843	0	0	0	0	0	0	0	0	0	0	1	0
tr|Q569U5|Q569U5_XENLA	402	C	3	0	LOC733188	LOC733188 protein (Fragment) OS=Xenopus laevis GN=LOC733188 PE=2 SV=1	1143	0	0	1	0	0	0	0	0	1	0	1	0
sp|Q6DFL5|THO5A_XENLA	403	C	0	4	thoc5-a	THO complex subunit 5 homolog A OS=Xenopus laevis GN=thoc5-a PE=1 SV=1	678	0	1	1	0	0	0	0	1	1	0	0	0
sp|Q7ZXA8|THO5B_XENLA	403		0	0	thoc5-b	THO complex subunit 5 homolog B OS=Xenopus laevis GN=thoc5-b PE=1 SV=1	678	0	1	1	0	0	0	0	1	1	0	0	0
tr|Q7ZYU4|Q7ZYU4_XENLA	404	C	0	8		Rps9-prov protein OS=Xenopus laevis PE=2 SV=1	194	0	2	2	0	0	1	0	1	1	0	0	1
tr|Q6GNX6|Q6GNX6_XENLA	404		0	0	rps9	MGC80804 protein OS=Xenopus laevis GN=rps9 PE=2 SV=1	194	0	2	2	0	0	1	0	1	1	0	0	1
sp|Q6PI53|MED24_XENLA	405	C	3	0	med24	Mediator of RNA polymerase II transcription subunit 24 OS=Xenopus laevis GN=med24 PE=2 SV=1	988	0	0	3	0	0	0	0	0	0	0	0	0
tr|Q7ZY59|Q7ZY59_XENLA	406	C	0	5		Clk2-prov protein OS=Xenopus laevis PE=2 SV=1	491	0	0	1	0	0	0	0	0	2	0	2	0
tr|Q3KPX3|Q3KPX3_XENLA	406		0	0	clk2	MGC131228 protein OS=Xenopus laevis GN=clk2 PE=2 SV=1	501	0	0	1	0	0	0	0	0	2	0	2	0
tr|Q0VA85|Q0VA85_XENLA	407	C	5	2	mki67	Mki67 protein (Fragment) OS=Xenopus laevis GN=mki67 PE=2 SV=1	2080	0	0	3	0	2	1	0	0	1	0	0	0
tr|Q08BU2|Q08BU2_XENLA	407		0	0	mki67	Uncharacterized protein OS=Xenopus laevis GN=mki67 PE=2 SV=1	2510	0	0	1	0	0	0	0	0	1	0	0	0
tr|Q6NRV6|Q6NRV6_XENLA	407		0	0	LOC431817	LOC431817 protein (Fragment) OS=Xenopus laevis GN=LOC431817 PE=2 SV=1	1196	0	0	1	0	0	0	0	0	1	0	0	0
tr|Q498L4|Q498L4_XENLA	407		0	0	LOC734164	LOC734164 protein (Fragment) OS=Xenopus laevis GN=LOC734164 PE=2 SV=1	1109	0	0	1	0	0	0	0	0	1	0	0	0
tr|Q642S5|Q642S5_XENLA	408	C	17	4	ccnt2	MGC81210 protein OS=Xenopus laevis GN=ccnt2 PE=2 SV=1	647	0	2	4	0	2	3	0	3	5	0	2	0
tr|Q32NI5|Q32NI5_XENLA	408		0	0	ccnt1	MGC131149 protein OS=Xenopus laevis GN=ccnt1 PE=2 SV=1	456	0	0	0	0	1	1	0	0	1	0	1	0
tr|Q6GPJ7|Q6GPJ7_XENLA	409	C	2	0	LOC443627	LOC443627 protein (Fragment) OS=Xenopus laevis GN=LOC443627 PE=2 SV=1	326	0	0	0	0	0	0	0	1	1	0	0	0
tr|A9P535|A9P535_XENLA	410	C	6	0		LSD1 (Fragment) OS=Xenopus laevis PE=2 SV=1	791	0	1	1	0	1	1	0	1	1	0	0	0
sp|Q6DJE4|CPSF5_XENLA	411	C	1	0	cpsf5	Cleavage and polyadenylation specificity factor subunit 5 OS=Xenopus laevis GN=cpsf5 PE=2 SV=1	227	0	0	1	0	0	0	0	0	0	0	0	0
tr|Q6PA89|Q6PA89_XENLA	412	C	4	0	yeats4	MGC68689 protein OS=Xenopus laevis GN=yeats4 PE=2 SV=1	227	0	0	1	0	2	0	0	1	0	0	0	0
sp|Q03414|MEF2A_XENLA	413	C	0	3	mef2a	Myocyte-specific enhancer factor 2A homolog OS=Xenopus laevis GN=mef2a PE=1 SV=2	516	0	1	1	0	0	0	0	1	0	0	0	0
sp|Q03413|MEF2D_XENLA	413		0	0	mef2d	Myocyte-specific enhancer factor 2D homolog OS=Xenopus laevis GN=mef2d PE=1 SV=1	498	0	1	1	0	0	0	0	1	0	0	0	0
tr|B7ZQS1|B7ZQS1_XENLA	413		0	0	Mef2	SRF-related protein (Clone SL-1) OS=Xenopus laevis GN=Mef2 PE=2 SV=1	498	0	1	1	0	0	0	0	1	0	0	0	0
tr|C0J6M9|C0J6M9_XENLA	413		0	0		MEF2A alpha 1b isoform OS=Xenopus laevis PE=2 SV=1	406	0	1	1	0	0	0	0	1	0	0	0	0
tr|Q9PSD8|Q9PSD8_XENLA	413		0	0		DNA binding protein MEF2 OS=Xenopus laevis PE=4 SV=1	382	0	1	1	0	0	0	0	1	0	0	0	0
tr|Q6GNN3|Q6GNN3_XENLA	413		0	0	mef2c	MGC80986 protein OS=Xenopus laevis GN=mef2c PE=2 SV=1	429	0	1	1	0	0	0	0	1	0	0	0	0
tr|C0J6M8|C0J6M8_XENLA	413		0	0		MEF2A alpha 1c isoform OS=Xenopus laevis PE=2 SV=1	142	0	1	1	0	0	0	0	1	0	0	0	0
tr|Q2KHS4|Q2KHS4_XENLA	413		0	0	mef2d	MGC131033 protein OS=Xenopus laevis GN=mef2d PE=2 SV=1	497	0	1	1	0	0	0	0	1	0	0	0	0
tr|C0J6M6|C0J6M6_XENLA	413		0	0		MEF2A alpha 2 isoform OS=Xenopus laevis PE=2 SV=1	477	0	1	1	0	0	0	0	1	0	0	0	0
tr|Q1XCD9|Q1XCD9_XENLA	414	C	5	0	hmgb3	High mobility group B3b protein OS=Xenopus laevis GN=hmgb3 PE=2 SV=1	201	0	1	2	0	1	0	0	0	0	0	0	1
tr|Q7ZY24|Q7ZY24_XENLA	415	C	17	0		Hmgb3-prov protein OS=Xenopus laevis PE=2 SV=1	202	0	2	2	0	2	2	0	2	2	0	3	2
tr|Q91596|Q91596_XENLA	416	C	0	1	HMG-1	High mobility group protein-1 OS=Xenopus laevis GN=HMG-1 PE=2 SV=1	210	0	0	1	0	0	0	0	0	0	0	0	0
tr|Q7SZ42|Q7SZ42_XENLA	416		0	0	hmgb1	Hmgb1-prov protein OS=Xenopus laevis GN=hmgb1 PE=2 SV=1	211	0	0	1	0	0	0	0	0	0	0	0	0
tr|Q6GNQ5|Q6GNQ5_XENLA	416		0	0	HMG-1	HMG-1 protein OS=Xenopus laevis GN=HMG-1 PE=2 SV=1	210	0	0	1	0	0	0	0	0	0	0	0	0
sp|P16143|PO2F1_XENLA	417	C	11	7	pou2f1	POU domain, class 2, transcription factor 1 OS=Xenopus laevis GN=pou2f1 PE=1 SV=3	758	0	4	2	0	3	2	0	3	2	0	2	0
sp|P20912|PO2F3_XENLA	417		0	0	pou2f3	POU domain, class 2, transcription factor 3 (Fragment) OS=Xenopus laevis GN=pou2f3 PE=2 SV=1	111	0	1	1	0	1	1	0	1	1	0	1	0
tr|Q99294|Q99294_XENLA	417		0	0		Xl-oct-1 protein (Fragment) OS=Xenopus laevis PE=2 SV=1	113	0	1	1	0	1	1	0	1	1	0	1	0
tr|Q99295|Q99295_XENLA	417		0	0		Xl-pou protein (Fragment) OS=Xenopus laevis PE=2 SV=1	115	0	1	1	0	1	1	0	1	1	0	1	0
tr|Q00003|Q00003_XENLA	417		0	0		Xl-oct-1 protein (Fragment) OS=Xenopus laevis PE=2 SV=1	114	0	1	1	0	1	1	0	1	1	0	1	0
sp|P45593|COF1B_XENLA	418	C	0	3	cfl1-b	Cofilin-1-B OS=Xenopus laevis GN=cfl1-b PE=1 SV=3	168	0	0	1	0	0	0	0	1	0	0	0	1
sp|P45695|COF1A_XENLA	418		0	0	cfl1-a	Cofilin-1-A OS=Xenopus laevis GN=cfl1-a PE=1 SV=3	168	0	0	1	0	0	0	0	1	0	0	0	1
tr|Q8AVP7|Q8AVP7_XENLA	419	C	0	1	LOC398543	LOC398543 protein (Fragment) OS=Xenopus laevis GN=LOC398543 PE=2 SV=1	230	0	0	1	0	0	0	0	0	0	0	0	0
tr|Q2KHP5|Q2KHP5_XENLA	419		0	0		Uncharacterized protein OS=Xenopus laevis PE=2 SV=1	391	0	0	1	0	0	0	0	0	0	0	0	0
tr|Q6DDW5|Q6DDW5_XENLA	419		0	0	LOC398543	LOC398543 protein (Fragment) OS=Xenopus laevis GN=LOC398543 PE=2 SV=1	256	0	0	1	0	0	0	0	0	0	0	0	0
sp|Q5FWM3|SOX3B_XENLA	420	C	8	0	sox3-b	Transcription factor Sox-3-B OS=Xenopus laevis GN=sox3-b PE=2 SV=1	307	0	1	1	0	1	1	0	2	1	0	1	0
sp|Q640J6|WD82A_XENLA	421	C	1	0	wdr82-a	WD repeat-containing protein 82-A OS=Xenopus laevis GN=wdr82-a PE=2 SV=1	313	0	0	0	0	1	0	0	0	0	0	0	0
tr|Q7SZS4|Q7SZS4_XENLA	422	C	1	0		Protein-L-isoaspartate O-methyltransferase OS=Xenopus laevis PE=2 SV=1	228	0	0	1	0	0	0	0	0	0	0	0	0
tr|A9UM18|A9UM18_XENLA	423	C	2	0	LOC100137676	LOC100137676 protein (Fragment) OS=Xenopus laevis GN=LOC100137676 PE=2 SV=1	476	0	0	2	0	0	0	0	0	0	0	0	0
sp|Q4KLQ5|WDR76_XENLA	424	C	1	0	wdr76	WD repeat-containing protein 76 OS=Xenopus laevis GN=wdr76 PE=2 SV=1	580	0	0	0	0	1	0	0	0	0	0	0	0
tr|Q5U248|Q5U248_XENLA	425	C	0	2	crebbp	LOC495689 protein OS=Xenopus laevis GN=crebbp PE=2 SV=1	2428	0	0	2	0	0	0	0	0	0	0	0	0
tr|Q7ZXN6|Q7ZXN6_XENLA	425		0	0	crebbp-A	Crebbp-A protein (Fragment) OS=Xenopus laevis GN=crebbp-A PE=2 SV=1	1047	0	0	2	0	0	0	0	0	0	0	0	0
sp|Q6P423|MED23_XENLA	426	C	1	0	med23	Mediator of RNA polymerase II transcription subunit 23 OS=Xenopus laevis GN=med23 PE=2 SV=1	1369	0	0	1	0	0	0	0	0	0	0	0	0
sp|Q66JA8|EPC2_XENLA	427	C	1	0	epc2	Enhancer of polycomb homolog 2 OS=Xenopus laevis GN=epc2 PE=2 SV=1	804	0	0	1	0	0	0	0	0	0	0	0	0
tr|Q3KQ13|Q3KQ13_XENLA	428	C	16	0	MGC131121	MGC131121 protein OS=Xenopus laevis GN=MGC131121 PE=2 SV=1	378	1	1	2	2	1	1	2	1	1	2	1	1
sp|Q8AVV6|SOSSC_XENLA	429	C	10	0	inip	SOSS complex subunit C OS=Xenopus laevis GN=inip PE=3 SV=1	110	0	0	2	0	2	1	0	1	1	0	2	1
sp|P15126|RL5B_XENLA	430	C	0	3	rpl5-b	60S ribosomal protein L5-B OS=Xenopus laevis GN=rpl5-b PE=2 SV=2	296	0	0	0	0	0	0	0	1	1	0	1	0
sp|P15125|RL5A_XENLA	430		0	0	rpl5-a	60S ribosomal protein L5-A OS=Xenopus laevis GN=rpl5-a PE=2 SV=2	296	0	0	0	0	0	0	0	1	1	0	1	0
tr|Q8AVX2|Q8AVX2_XENLA	430		0	0	rpl5	Rpl5-a protein OS=Xenopus laevis GN=rpl5 PE=2 SV=1	296	0	0	0	0	0	0	0	1	1	0	1	0
##sp|Q6DFF6|KLH20_XENLA	431	C	1	0	##klhl20	##Kelch-like protein 20 OS=Xenopus laevis GN=klhl20 PE=2 SV=1	604	0	0	0	0	1	0	0	0	0	0	0	0
tr|Q4V7P3|Q4V7P3_XENLA	432	C	1	0	polr2l.1	Polr2l protein OS=Xenopus laevis GN=polr2l.1 PE=2 SV=1	67	0	0	1	0	0	0	0	0	0	0	0	0
sp|P26233|CTNB_XENLA	433		0	0	ctnnb1	Catenin beta OS=Xenopus laevis GN=ctnnb1 PE=1 SV=1	781	0	0	0	0	0	0	0	0	0	0	1	0
sp|P30998|PLAK_XENLA	433	C	0	3	jup	Junction plakoglobin OS=Xenopus laevis GN=jup PE=2 SV=1	738	0	0	0	0	0	0	0	0	1	0	2	0
tr|Q63ZT4|Q63ZT4_XENLA	433		0	0	ctnnb1	Beta-catenin protein OS=Xenopus laevis GN=ctnnb1 PE=2 SV=1	781	0	0	0	0	0	0	0	0	0	0	1	0
tr|Q7ZX35|Q7ZX35_XENLA	433		0	0	ctnnb1	Ctnnb1-prov protein OS=Xenopus laevis GN=ctnnb1 PE=2 SV=1	781	0	0	0	0	0	0	0	0	0	0	1	0
tr|Q6NU15|Q6NU15_XENLA	433		0	0	jup	LOC398496 protein OS=Xenopus laevis GN=jup PE=2 SV=1	737	0	0	0	0	0	0	0	0	1	0	2	0
tr|Q7ZWS3|Q7ZWS3_XENLA	433		0	0	LOC398496	LOC398496 protein (Fragment) OS=Xenopus laevis GN=LOC398496 PE=2 SV=1	769	0	0	0	0	0	0	0	0	1	0	2	0
tr|A1A5I6|A1A5I6_XENLA	433		0	0	ctnnb1	Ctnnb1 protein OS=Xenopus laevis GN=ctnnb1 PE=2 SV=1	780	0	0	0	0	0	0	0	0	0	0	1	0
tr|Q6NRA1|Q6NRA1_XENLA	434	C	0	3	LOC431926	LOC431926 protein (Fragment) OS=Xenopus laevis GN=LOC431926 PE=2 SV=1	690	0	0	1	0	1	0	0	0	1	0	0	0
tr|Q32NV0|Q32NV0_XENLA	434		0	0	e2f8	LOC431926 protein OS=Xenopus laevis GN=e2f8 PE=2 SV=1	724	0	0	1	0	1	0	0	0	1	0	0	0
tr|B4XAK7|B4XAK7_XENLA	435	C	3	4		Sperm-specific nuclear basic protein 1 OS=Xenopus laevis PE=2 SV=1	192	0	0	2	0	2	2	0	0	1	0	0	0
tr|Q2VPN3|Q2VPN3_XENLA	435		0	0	h1fx	H1fx protein OS=Xenopus laevis GN=h1fx PE=2 SV=1	218	0	0	1	0	1	1	0	0	1	0	0	0
tr|Q8AVL3|Q8AVL3_XENLA	435		0	0		H1fx-prov protein OS=Xenopus laevis PE=2 SV=1	217	0	0	1	0	1	1	0	0	1	0	0	0
sp|Q9YGY3|BUB3_XENLA	436	C	5	0	bub3	Mitotic checkpoint protein BUB3 OS=Xenopus laevis GN=bub3 PE=1 SV=1	330	0	1	3	0	0	0	0	0	1	0	0	0
tr|Q498G8|Q498G8_XENLA	437	C	0	8		Uncharacterized protein OS=Xenopus laevis PE=2 SV=1	454	0	0	2	0	2	1	0	0	1	0	2	0
tr|Q6DDF1|Q6DDF1_XENLA	437		0	0	gabpa	Gabpa-prov protein OS=Xenopus laevis GN=gabpa PE=2 SV=1	452	0	0	2	0	2	1	0	0	1	0	2	0
sp|Q6GLI9|RPA49_XENLA	438	C	4	0	polr1e	DNA-directed RNA polymerase I subunit RPA49 OS=Xenopus laevis GN=polr1e PE=2 SV=1	419	0	0	3	0	0	0	0	1	0	0	0	0
tr|Q6GNH1|Q6GNH1_XENLA	439	C	6	0	rpl23	MGC82808 protein OS=Xenopus laevis GN=rpl23 PE=2 SV=1	140	0	1	2	0	0	0	0	0	2	0	1	0
##tr|B7ZSB6|B7ZSB6_XENLA	440	C	3	0		##Uncharacterized protein OS=Xenopus laevis PE=2 SV=1	1066	0	0	0	0	0	0	0	1	0	0	1	1
tr|Q6DFE8|Q6DFE8_XENLA	441	C	2	0	tdp1	Tdp1-prov protein OS=Xenopus laevis GN=tdp1 PE=2 SV=1	597	0	0	2	0	0	0	0	0	0	0	0	0
tr|B1WBD6|B1WBD6_XENLA	442	C	5	0	nsmce4a	LOC100158435 protein OS=Xenopus laevis GN=nsmce4a PE=2 SV=1	334	0	0	0	0	1	0	0	2	1	0	1	0
tr|Q6GPS0|Q6GPS0_XENLA	443	C	4	0	mdn1	MGC82653 protein OS=Xenopus laevis GN=mdn1 PE=2 SV=1	374	0	2	1	0	0	0	0	0	0	0	1	0
tr|Q5U514|Q5U514_XENLA	444		0	0	plrg1	LOC495399 protein OS=Xenopus laevis GN=plrg1 PE=2 SV=1	517	0	2	1	0	1	0	0	0	0	0	0	0
tr|Q5XHG4|Q5XHG4_XENLA	444	C	2	4	LOC495006	LOC495006 protein OS=Xenopus laevis GN=LOC495006 PE=2 SV=1	517	0	2	2	0	1	0	0	0	1	0	0	0
tr|Q640G4|Q640G4_XENLA	445	C	0	1	LOC398505	LOC398505 protein (Fragment) OS=Xenopus laevis GN=LOC398505 PE=2 SV=1	659	0	0	1	0	0	0	0	0	0	0	0	0
tr|Q498H9|Q498H9_XENLA	445		0	0	thoc1	LOC398505 protein OS=Xenopus laevis GN=thoc1 PE=2 SV=1	654	0	0	1	0	0	0	0	0	0	0	0	0
tr|Q7ZXL7|Q7ZXL7_XENLA	445		0	0	LOC398505	LOC398505 protein (Fragment) OS=Xenopus laevis GN=LOC398505 PE=2 SV=1	659	0	0	1	0	0	0	0	0	0	0	0	0
tr|Q6ING8|Q6ING8_XENLA	446	C	4	0	ung	Uracil-DNA glycosylase OS=Xenopus laevis GN=ung PE=2 SV=1	304	0	1	1	0	0	0	0	1	1	0	0	0
tr|Q569R9|Q569R9_XENLA	447	C	0	1	sri	Sri protein OS=Xenopus laevis GN=sri PE=2 SV=1	196	0	0	1	0	0	0	0	0	0	0	0	0
tr|A2VDA2|A2VDA2_XENLA	447		0	0	sri	LOC100037199 protein OS=Xenopus laevis GN=sri PE=2 SV=1	196	0	0	1	0	0	0	0	0	0	0	0	0
tr|B7X613|B7X613_XENLA	448	C	2	0	XGB	Nucleolar GTP-binding protein 1 OS=Xenopus laevis GN=XGB PE=2 SV=1	633	0	0	1	0	1	0	0	0	0	0	0	0
tr|Q8AY27|Q8AY27_XENLA	449	C	0	1	rad1	Checkpoint protein OS=Xenopus laevis GN=rad1 PE=2 SV=1	281	0	0	0	0	0	0	0	0	0	0	1	0
tr|A5PKS1|A5PKS1_XENLA	449		0	0	Rad1	Checkpoint protein OS=Xenopus laevis GN=Rad1 PE=2 SV=1	281	0	0	0	0	0	0	0	0	0	0	1	0
tr|Q8JGN6|Q8JGN6_XENLA	450	C	0	10		Protein inhibitor of activated STAT1 OS=Xenopus laevis PE=2 SV=1	649	0	2	2	0	1	1	0	1	2	0	1	0
tr|Q5XHH3|Q5XHH3_XENLA	450		0	0	pias1	Pias1-A protein OS=Xenopus laevis GN=pias1 PE=2 SV=1	649	0	2	2	0	1	1	0	1	2	0	1	0
tr|Q6IRN4|Q6IRN4_XENLA	450	C	1	0	pias2	MGC83751 protein OS=Xenopus laevis GN=pias2 PE=2 SV=1	584	0	1	1	0	1	1	0	2	1	0	1	0
tr|Q6GMA8|Q6GMA8_XENLA	450		0	0	pias3	MGC81944 protein OS=Xenopus laevis GN=pias3 PE=2 SV=1	633	0	1	1	0	1	1	0	1	1	0	1	0
tr|Q6DDH4|Q6DDH4_XENLA	451	C	2	0	ik	MGC83922 protein OS=Xenopus laevis GN=ik PE=2 SV=1	510	0	0	0	0	0	1	0	0	0	0	1	0
tr|Q6NTR4|Q6NTR4_XENLA	452	C	10	0	rpl14	MGC83076 protein OS=Xenopus laevis GN=rpl14 PE=2 SV=1	138	0	1	2	0	0	1	1	1	2	0	1	1
tr|Q0X0A4|Q0X0A4_XENLA	453	C	0	2		Keratin OS=Xenopus laevis PE=2 SV=1	441	0	0	0	0	0	0	0	0	1	0	1	0
tr|A2VDC4|A2VDC4_XENLA	453		0	0	krt15	LOC779065 protein OS=Xenopus laevis GN=krt15 PE=2 SV=1	447	0	0	0	0	0	0	0	0	1	0	1	0
tr|Q6IND2|Q6IND2_XENLA	454	C	0	11	MGC83501	MGC83501 protein OS=Xenopus laevis GN=MGC83501 PE=2 SV=1	199	1	1	1	1	1	1	1	1	1	0	1	1
tr|Q6GQB3|Q6GQB3_XENLA	454		0	0	prdx1	MGC80194 protein OS=Xenopus laevis GN=prdx1 PE=2 SV=1	199	1	1	1	1	1	1	1	1	1	0	1	1
tr|Q6IP60|Q6IP60_XENLA	455	C	0	4	hspd1	Hspd1 protein OS=Xenopus laevis GN=hspd1 PE=2 SV=1	579	0	0	0	1	0	1	0	0	0	0	0	2
tr|Q7ZTK0|Q7ZTK0_XENLA	455		0	0		MGC53106 protein OS=Xenopus laevis PE=2 SV=1	468	0	0	0	1	0	1	0	0	0	0	0	2
tr|Q7ZTR6|Q7ZTR6_XENLA	455		0	0	Hspd1	Hspd1 protein (Fragment) OS=Xenopus laevis GN=Hspd1 PE=2 SV=1	555	0	0	0	1	0	1	0	0	0	0	0	2
sp|Q2TAF4|INT6A_XENLA	456	C	0	7	ints6-a	Integrator complex subunit 6-A OS=Xenopus laevis GN=ints6-a PE=2 SV=1	883	0	1	2	0	0	0	0	1	1	0	1	1
sp|Q5U4W6|INT6B_XENLA	456		0	0	ints6-b	Integrator complex subunit 6-B OS=Xenopus laevis GN=ints6-b PE=2 SV=1	883	0	1	2	0	0	0	0	1	1	0	1	1
tr|Q8AVP6|Q8AVP6_XENLA	457	C	0	2	LOC446289	Gnb2l1-prov protein OS=Xenopus laevis GN=LOC446289 PE=2 SV=1	317	0	0	1	0	0	0	0	0	0	0	0	1
tr|Q5U275|Q5U275_XENLA	457		0	0	gnb2l1	LOC495666 protein OS=Xenopus laevis GN=gnb2l1 PE=2 SV=1	317	0	0	1	0	0	0	0	0	0	0	0	1
tr|Q9W7I1|Q9W7I1_XENLA	457		0	0	RACK1	Activated protein kinase C receptor OS=Xenopus laevis GN=RACK1 PE=2 SV=1	317	0	0	1	0	0	0	0	0	0	0	0	1
sp|Q91820|AURAA_XENLA	458	C	4	0	aurka-a	Aurora kinase A-A OS=Xenopus laevis GN=aurka-a PE=1 SV=1	407	0	1	1	0	1	0	0	1	0	0	0	0
sp|Q6NUH0|RL31_XENLA	459	C	10	0	rpl31	60S ribosomal protein L31 OS=Xenopus laevis GN=rpl31 PE=2 SV=1	125	0	2	1	0	1	1	0	2	1	0	1	1
sp|Q6PGT0|TAD3A_XENLA	460	C	0	1	tada3-a	Transcriptional adapter 3-A OS=Xenopus laevis GN=tada3-a PE=2 SV=1	432	0	0	1	0	0	0	0	0	0	0	0	0
sp|Q66IZ5|TAD3B_XENLA	460		0	0	tada3-b	Transcriptional adapter 3-B OS=Xenopus laevis GN=tada3-b PE=2 SV=1	432	0	0	1	0	0	0	0	0	0	0	0	0
sp|Q801R8|GPD1L_XENLA	461	C	1	0	gpd1l	Glycerol-3-phosphate dehydrogenase 1-like protein OS=Xenopus laevis GN=gpd1l PE=2 SV=1	352	0	0	1	0	0	0	0	0	0	0	0	0
sp|Q6GLW1|THO4B_XENLA	462	C	21	31	alyref-b	THO complex subunit 4-B OS=Xenopus laevis GN=alyref-b PE=2 SV=1	256	0	7	7	0	8	7	0	7	6	0	7	3
sp|Q58EA2|THO4A_XENLA	462	C	7	0	alyref-a	THO complex subunit 4-A OS=Xenopus laevis GN=alyref-a PE=2 SV=1	256	0	5	5	0	6	5	0	4	5	0	5	3
tr|Q6WSQ3|Q6WSQ3_XENLA	463	C	1	0	pole3	CHRAC17 protein OS=Xenopus laevis GN=pole3 PE=2 SV=1	147	0	0	1	0	0	0	0	0	0	0	0	0
tr|Q5MPF8|Q5MPF8_XENLA	464	C	2	2	atm	Ataxia telangiectasia mutated OS=Xenopus laevis GN=atm PE=2 SV=1	3061	0	0	2	0	0	0	0	1	1	0	0	0
tr|Q9PTM0|Q9PTM0_XENLA	464		0	0	ATM	Ataxia telangiectasia mutated (Fragment) OS=Xenopus laevis GN=ATM PE=2 SV=1	1579	0	0	0	0	0	0	0	1	1	0	0	0
tr|Q6NRJ4|Q6NRJ4_XENLA	465	C	8	0	mcph1	MGC83773 protein OS=Xenopus laevis GN=mcph1 PE=2 SV=1	305	0	1	1	0	2	0	0	1	1	0	1	1
sp|Q5XGY9|MND1_XENLA	466	C	1	0	mnd1	Meiotic nuclear division protein 1 homolog OS=Xenopus laevis GN=mnd1 PE=2 SV=1	205	0	0	1	0	0	0	0	0	0	0	0	0
sp|Q6GNJ8|VPS72_XENLA	467	C	7	2	vps72	Vacuolar protein sorting-associated protein 72 homolog OS=Xenopus laevis GN=vps72 PE=2 SV=1	353	0	1	2	0	2	1	0	1	1	0	1	0
tr|Q6GM66|Q6GM66_XENLA	467		0	0	vps72	MGC83390 protein OS=Xenopus laevis GN=vps72 PE=2 SV=1	125	0	0	1	0	1	0	0	0	0	0	0	0
##tr|Q4V7V1|Q4V7V1_XENLA	468	C	0	1	##LOC443586	##LOC443586 protein (Fragment) OS=Xenopus laevis GN=LOC443586 PE=2 SV=1	293	0	0	0	0	0	0	0	0	1	0	0	0
##tr|Q6GQ96|Q6GQ96_XENLA	468		0	0	##LOC443586	##LOC443586 protein (Fragment) OS=Xenopus laevis GN=LOC443586 PE=2 SV=1	291	0	0	0	0	0	0	0	0	1	0	0	0
sp|Q7ZYR8|RSRC2_XENLA	469	C	1	0	rsrc2	Arginine/serine-rich coiled-coil protein 2 OS=Xenopus laevis GN=rsrc2 PE=2 SV=1	350	0	0	0	0	0	0	0	0	1	0	0	0
sp|Q71U00|SKP1_XENLA	470	C	13	0	skp1	S-phase kinase-associated protein 1 OS=Xenopus laevis GN=skp1 PE=1 SV=3	163	0	1	3	0	2	1	0	2	1	0	2	1
tr|H6X1M8|H6X1M8_XENLA	471	C	4	0	sgol2	Shugoshin-like protein 2 OS=Xenopus laevis GN=sgol2 PE=2 SV=1	1029	0	0	2	0	0	1	0	1	0	0	0	0
tr|Q7SZB7|Q7SZB7_XENLA	472	C	0	3	rpl18a	60S ribosomal protein L18a OS=Xenopus laevis GN=rpl18a PE=2 SV=1	176	0	0	0	0	1	0	0	1	1	0	0	0
tr|Q7ZYQ8|Q7ZYQ8_XENLA	472		0	0	RPL18A	RPL18A protein (Fragment) OS=Xenopus laevis GN=RPL18A PE=2 SV=1	178	0	0	0	0	1	0	0	1	1	0	0	0
tr|Q6GPR8|Q6GPR8_XENLA	473	C	0	8	dynll1	Dynein light chain dlc8a OS=Xenopus laevis GN=dynll1 PE=2 SV=1	89	0	0	1	0	1	1	0	1	2	0	1	1
tr|Q5M781|Q5M781_XENLA	473		0	0	dynll2	Dynein light chain dlc8b OS=Xenopus laevis GN=dynll2 PE=2 SV=1	89	0	0	1	0	1	1	0	1	2	0	1	1
tr|Q6NTS8|Q6NTS8_XENLA	473		0	0	dynll1	MGC68763 protein OS=Xenopus laevis GN=dynll1 PE=2 SV=1	89	0	0	1	0	1	1	0	1	2	0	1	1
##tr|Q5XHG9|Q5XHG9_XENLA	474	C	2	0	##rptor	##LOC495002 protein OS=Xenopus laevis GN=rptor PE=2 SV=1	1334	0	0	0	0	0	0	0	0	1	0	1	0
tr|A0JMY9|A0JMY9_XENLA	475	C	5	0	hic2	Hic2 protein OS=Xenopus laevis GN=hic2 PE=2 SV=1	458	0	0	2	0	1	1	0	0	1	0	0	0
sp|P47830|RL27A_XENLA	476	C	0	11	rpl27a	60S ribosomal protein L27a OS=Xenopus laevis GN=rpl27a PE=2 SV=2	148	0	1	2	0	2	1	0	1	1	1	1	1
tr|Q7SZB2|Q7SZB2_XENLA	476		0	0	rpl27a	Rpl27a protein OS=Xenopus laevis GN=rpl27a PE=2 SV=1	148	0	1	2	0	2	1	0	1	1	1	1	1
tr|Q5XK98|Q5XK98_XENLA	477	C	4	0	msl3	LOC494864 protein OS=Xenopus laevis GN=msl3 PE=2 SV=1	355	0	0	1	0	1	1	0	0	1	0	0	0
tr|Q66KY6|Q66KY6_XENLA	478	C	16	0	rpl11	MGC85310 protein OS=Xenopus laevis GN=rpl11 PE=2 SV=1	177	0	2	2	0	2	2	0	2	1	0	2	3
tr|A0JMS6|A0JMS6_XENLA	479	C	1	0	nkap	MGC154512 protein OS=Xenopus laevis GN=nkap PE=2 SV=1	326	0	0	1	0	0	0	0	0	0	0	0	0
tr|Q7ZWZ7|Q7ZWZ7_XENLA	480	C	2	0	rpl15	Ribosomal protein L15 OS=Xenopus laevis GN=rpl15 PE=2 SV=1	204	0	0	1	0	0	0	0	0	0	0	0	1
tr|Q5U4L0|Q5U4L0_XENLA	481	C	0	1	LOC100101274	LOC100101274 protein OS=Xenopus laevis GN=LOC100101274 PE=2 SV=1	320	0	0	0	0	0	0	0	0	1	0	0	0
tr|Q6GR52|Q6GR52_XENLA	481		0	0		Uncharacterized protein OS=Xenopus laevis PE=2 SV=1	285	0	0	0	0	0	0	0	0	1	0	0	0
tr|Q66J61|Q66J61_XENLA	482	C	2	0	morf4l1	MGC81811 protein OS=Xenopus laevis GN=morf4l1 PE=2 SV=1	321	0	0	1	0	1	0	0	0	0	0	0	0
sp|Q91876|MCM7A_XENLA	483	C	0	3	mcm7-a	DNA replication licensing factor mcm7-A OS=Xenopus laevis GN=mcm7-a PE=1 SV=2	720	0	1	0	0	2	0	0	0	0	0	0	0
sp|Q7ZXB1|MCM7B_XENLA	483		0	0	mcm7-b	DNA replication licensing factor mcm7-B OS=Xenopus laevis GN=mcm7-b PE=2 SV=1	720	0	1	0	0	2	0	0	0	0	0	0	0
sp|Q6DJM6|INT12_XENLA	484	C	2	0	ints12	Integrator complex subunit 12 OS=Xenopus laevis GN=ints12 PE=2 SV=1	464	0	0	1	0	0	0	0	1	0	0	0	0
tr|Q6AZR5|Q6AZR5_XENLA	485	C	0	1		Uncharacterized protein (Fragment) OS=Xenopus laevis PE=2 SV=1	158	0	0	1	0	0	0	0	0	0	0	0	0
tr|Q9I9K6|Q9I9K6_XENLA	485		0	0	pin1	Prolyl isomerase Pin1 OS=Xenopus laevis GN=pin1 PE=1 SV=1	159	0	0	1	0	0	0	0	0	0	0	0	0
tr|Q68F04|Q68F04_XENLA	486	C	1	0	map4k5	Mitogen-activated protein kinase kinase kinase kinase OS=Xenopus laevis GN=map4k5 PE=2 SV=1	823	0	0	0	0	0	0	0	0	0	0	0	1
tr|Q98UF4|Q98UF4_XENLA	487	C	0	6		Ubiquitin-activating enzyme E1 (Fragment) OS=Xenopus laevis PE=2 SV=1	78	1	1	0	0	0	1	1	0	1	0	0	1
tr|Q801S7|Q801S7_XENLA	487		0	0	uba1a	Uba1a protein OS=Xenopus laevis GN=uba1a PE=2 SV=1	1059	1	1	0	0	0	1	1	0	1	0	0	1
tr|Q6P285|Q6P285_XENLA	487		0	0	uba1	Uba1b protein OS=Xenopus laevis GN=uba1 PE=2 SV=1	1060	1	1	0	0	0	1	1	0	1	0	0	1
sp|P24801|ANX2B_XENLA	488	C	0	1	anxa2-b	Annexin A2-B OS=Xenopus laevis GN=anxa2-b PE=2 SV=3	340	0	0	0	0	0	0	0	0	1	0	0	0
sp|P27006|ANX2A_XENLA	488		0	0	anxa2-a	Annexin A2-A OS=Xenopus laevis GN=anxa2-a PE=2 SV=2	340	0	0	0	0	0	0	0	0	1	0	0	0
tr|Q7ZXM2|Q7ZXM2_XENLA	488		0	0	LOC397735	Annexin OS=Xenopus laevis GN=LOC397735 PE=2 SV=1	340	0	0	0	0	0	0	0	0	1	0	0	0
tr|Q92128|Q92128_XENLA	488		0	0		Annexin (Fragment) OS=Xenopus laevis PE=2 SV=2	314	0	0	0	0	0	0	0	0	1	0	0	0
sp|P20965|PABPA_XENLA	489	C	0	2	pabpc1-a	Polyadenylate-binding protein 1-A OS=Xenopus laevis GN=pabpc1-a PE=1 SV=3	633	0	0	0	1	0	0	1	0	0	0	0	0
sp|Q98SP8|EPABA_XENLA	489		0	0	epabp-a	Embryonic polyadenylate-binding protein A OS=Xenopus laevis GN=epabp-a PE=1 SV=2	629	0	0	0	1	0	0	1	0	0	0	0	0
sp|Q6GR16|EPABB_XENLA	489		0	0	epabp-b	Embryonic polyadenylate-binding protein B OS=Xenopus laevis GN=epabp-b PE=2 SV=1	629	0	0	0	1	0	0	1	0	0	0	0	0
sp|Q6IP09|PABPB_XENLA	489		0	0	pabpc1-b	Polyadenylate-binding protein 1-B OS=Xenopus laevis GN=pabpc1-b PE=2 SV=1	633	0	0	0	1	0	0	1	0	0	0	0	0
tr|Q6GNR8|Q6GNR8_XENLA	489		0	0	pabpc4	Polyadenylate-binding protein OS=Xenopus laevis GN=pabpc4 PE=2 SV=1	626	0	0	0	1	0	0	1	0	0	0	0	0
tr|Q5U586|Q5U586_XENLA	489		0	0	LOC495336	Polyadenylate-binding protein OS=Xenopus laevis GN=LOC495336 PE=2 SV=1	711	0	0	0	1	0	0	1	0	0	0	0	0
sp|P12606|ITB1A_XENLA	490	C	1	0	itgb1-a	Integrin beta-1-A OS=Xenopus laevis GN=itgb1-a PE=2 SV=1	798	0	0	1	0	0	0	0	0	0	0	0	0
tr|A1L2X3|A1L2X3_XENLA	491	C	0	1	ucp1	LOC100036979 protein OS=Xenopus laevis GN=ucp1 PE=2 SV=1	309	0	0	1	0	0	0	0	0	0	0	0	0
tr|Q5U234|Q5U234_XENLA	491		0	0	ucp3	LOC495700 protein OS=Xenopus laevis GN=ucp3 PE=2 SV=1	309	0	0	1	0	0	0	0	0	0	0	0	0
tr|Q91897|Q91897_XENLA	492	C	2	0	fgfr1	Fibroblast growth factor receptor OS=Xenopus laevis GN=fgfr1 PE=2 SV=1	814	0	0	0	1	0	0	1	0	0	0	0	0
sp|Q68F70|INT4_XENLA	493	C	6	0	ints4	Integrator complex subunit 4 OS=Xenopus laevis GN=ints4 PE=2 SV=1	969	0	1	1	0	1	0	0	1	1	0	1	0
sp|Q6NRI8|CENPS_XENLA	494	C	7	0	apitd1	Centromere protein S OS=Xenopus laevis GN=apitd1 PE=2 SV=1	135	0	0	1	0	1	1	0	1	1	0	1	1
tr|Q8AYP1|Q8AYP1_XENLA	495	C	0	5	MBD3	MBD3 protein OS=Xenopus laevis GN=MBD3 PE=2 SV=1	302	0	1	1	0	1	0	0	1	0	0	1	0
tr|Q9PUM9|Q9PUM9_XENLA	495		0	0	MBD3	Methyl-CpG binding protein MBD3 OS=Xenopus laevis GN=MBD3 PE=2 SV=1	282	0	1	1	0	1	0	0	1	0	0	1	0
tr|Q9PUM8|Q9PUM8_XENLA	495		0	0	mbd3	Methyl-CpG binding protein MBD3 long form OS=Xenopus laevis GN=mbd3 PE=2 SV=1	303	0	1	1	0	1	0	0	1	0	0	1	0
tr|Q8AYP2|Q8AYP2_XENLA	495		0	0	MBD3	Methyl-CpG binding protein MBD3 OS=Xenopus laevis GN=MBD3 PE=2 SV=1	283	0	1	1	0	1	0	0	1	0	0	1	0
tr|B4YQT7|B4YQT7_XENLA	496	C	1	0	NIF	Neuronal intermediate filament (Fragment) OS=Xenopus laevis GN=NIF PE=4 SV=1	17	0	0	0	1	0	0	0	0	0	0	0	0
tr|Q6DE48|Q6DE48_XENLA	497	C	14	0	rbbp5	Rbbp5-prov protein OS=Xenopus laevis GN=rbbp5 PE=2 SV=1	501	0	3	1	0	3	2	0	0	2	0	2	1
sp|Q8AYC2|MKL1_XENLA	498	C	0	1	mkl1	MKL/myocardin-like protein 1 OS=Xenopus laevis GN=mkl1 PE=2 SV=1	936	0	0	0	0	0	0	0	0	0	0	1	0
tr|Q6GP66|Q6GP66_XENLA	498		0	0	mkl1	MRTF-A protein OS=Xenopus laevis GN=mkl1 PE=2 SV=1	991	0	0	0	0	0	0	0	0	0	0	1	0
##tr|Q5XH06|Q5XH06_XENLA	499	C	1	0	##LOC495099	##LOC495099 protein OS=Xenopus laevis GN=LOC495099 PE=2 SV=1	493	0	1	0	0	0	0	0	0	0	0	0	0
tr|Q6DE62|Q6DE62_XENLA	500	C	1	0	hspa4	LOC398863 protein OS=Xenopus laevis GN=hspa4 PE=2 SV=1	836	0	0	1	0	0	0	0	0	0	0	0	0
sp|Q4KLS8|ARGL1_XENLA	501	C	5	0	arglu1	Arginine and glutamate-rich protein 1 OS=Xenopus laevis GN=arglu1 PE=2 SV=1	265	0	0	1	0	0	0	0	1	1	0	1	1
sp|Q640I9|KDM2B_XENLA	502	C	4	0	kdm2b	Lysine-specific demethylase 2B OS=Xenopus laevis GN=kdm2b PE=2 SV=1	1259	0	0	1	0	1	0	0	1	0	0	1	0
sp|P10999|LAML3_XENLA	503	C	0	1		Lamin-L(III) OS=Xenopus laevis PE=2 SV=2	583	0	1	0	0	0	0	0	0	0	0	0	0
tr|Q32NH4|Q32NH4_XENLA	503		0	0	MGC131227	MGC131227 protein OS=Xenopus laevis GN=MGC131227 PE=2 SV=1	622	0	1	0	0	0	0	0	0	0	0	0	0
tr|Q68F65|Q68F65_XENLA	504	C	4	0	arih2	Arih2 protein OS=Xenopus laevis GN=arih2 PE=2 SV=1	492	0	1	0	0	0	1	1	0	0	0	1	0
tr|Q4FZP7|Q4FZP7_XENLA	505	C	2	0	rpl39	MGC116452 protein OS=Xenopus laevis GN=rpl39 PE=2 SV=1	51	0	0	1	0	0	0	0	1	0	0	0	0
tr|B7TYL1|B7TYL1_XENLA	506	C	1	0	senp6	Sentrin/SUMO-specific protease 6 OS=Xenopus laevis GN=senp6 PE=2 SV=1	1103	0	0	0	0	0	0	0	0	1	0	0	0
sp|Q9YGP5|RBPMS_XENLA	507	C	0	3	rbpms	RNA-binding protein with multiple splicing OS=Xenopus laevis GN=rbpms PE=2 SV=1	196	0	1	1	0	0	0	0	0	1	0	0	0
tr|Q66IX3|Q66IX3_XENLA	507		0	0	rbpms2	MGC84222 protein OS=Xenopus laevis GN=rbpms2 PE=2 SV=1	197	0	1	1	0	0	0	0	0	1	0	0	0
##tr|A8J4K6|A8J4K6_XENLA	508	C	3	0	##TxpB_Uribo1	##PiggyBac transposase Uribo1 OS=Xenopus laevis GN=TxpB_Uribo1 PE=4 SV=1	592	0	0	1	0	1	0	0	1	0	0	0	0
sp|P29540|T2EB_XENLA	509	C	1	0	gtf2e2	General transcription factor IIE subunit 2 OS=Xenopus laevis GN=gtf2e2 PE=2 SV=1	288	0	0	1	0	0	0	0	0	0	0	0	0
tr|Q7ZX57|Q7ZX57_XENLA	510	C	11	0	srsf2	Sfrs2-prov protein OS=Xenopus laevis GN=srsf2 PE=2 SV=1	215	0	0	0	0	3	1	0	2	2	0	2	1
sp|Q66KU4|RL36_XENLA	511	C	1	0	rpl36	60S ribosomal protein L36 OS=Xenopus laevis GN=rpl36 PE=3 SV=1	105	0	0	1	0	0	0	0	0	0	0	0	0
tr|Q7ZX47|Q7ZX47_XENLA	512	C	0	1	MGC53710	MGC53710 protein OS=Xenopus laevis GN=MGC53710 PE=2 SV=1	232	0	0	0	0	0	0	1	0	0	0	0	0
tr|Q9W761|Q9W761_XENLA	512		0	0	rnd1	Rho6 protein OS=Xenopus laevis GN=rnd1 PE=2 SV=1	232	0	0	0	0	0	0	1	0	0	0	0	0
##sp|Q6AX60|PTHB1_XENLA	513	C	4	0	##bbs9	##Protein PTHB1 OS=Xenopus laevis GN=bbs9 PE=2 SV=1	849	0	0	0	0	1	1	0	1	1	0	0	0
sp|Q7ZXH2|NSE2_XENLA	514	C	3	0	nsmce2	E3 SUMO-protein ligase NSE2 OS=Xenopus laevis GN=nsmce2 PE=2 SV=1	238	0	0	0	0	1	0	0	0	1	0	1	0
sp|Q4V842|GPTC4_XENLA	515	C	4	0	gpatch4	G patch domain-containing protein 4 OS=Xenopus laevis GN=gpatch4 PE=2 SV=1	324	0	1	1	0	2	0	0	0	0	0	0	0
tr|Q800A4|Q800A4_XENLA	516	C	9	0	prim1	DNA primase OS=Xenopus laevis GN=prim1 PE=2 SV=1	420	0	0	0	0	1	1	0	1	3	0	2	1
sp|Q5NDM2|FXI2A_XENLA	517	C	0	4	foxi2-a	Forkhead box protein I2-A OS=Xenopus laevis GN=foxi2-a PE=2 SV=1	369	0	0	1	0	0	0	0	1	1	0	1	0
tr|B7ZQS3|B7ZQS3_XENLA	517		0	0	FoxI2	Fox factor OS=Xenopus laevis GN=FoxI2 PE=2 SV=1	369	0	0	1	0	0	0	0	1	1	0	1	0
tr|B7ZQS5|B7ZQS5_XENLA	517		0	0	FoxI2	Fox factor OS=Xenopus laevis GN=FoxI2 PE=2 SV=1	369	0	0	1	0	0	0	0	1	1	0	1	0
tr|Q5PPZ3|Q5PPZ3_XENLA	518	C	2	0	LOC496036	LOC496036 protein OS=Xenopus laevis GN=LOC496036 PE=2 SV=1	217	0	0	1	0	1	0	0	0	0	0	0	0
##tr|Q68ES7|Q68ES7_XENLA	519	C	0	1	##LOC398602	##LOC398602 protein OS=Xenopus laevis GN=LOC398602 PE=2 SV=1	353	0	1	0	0	0	0	0	0	0	0	0	0
##tr|Q7SZK8|Q7SZK8_XENLA	519		0	0		##Green rod opsin OS=Xenopus laevis PE=2 SV=1	362	0	1	0	0	0	0	0	0	0	0	0	0
sp|P02412|RL18B_XENLA	520	C	0	1	rpl18-b	60S ribosomal protein L18-B OS=Xenopus laevis GN=rpl18-b PE=2 SV=4	188	0	0	1	0	0	0	0	0	0	0	0	0
tr|Q7SZA8|Q7SZA8_XENLA	520		0	0	rpl18	Rpl18-b protein OS=Xenopus laevis GN=rpl18 PE=2 SV=1	188	0	0	1	0	0	0	0	0	0	0	0	0
tr|B2GTY1|B2GTY1_XENLA	521	C	3	0	LOC100158450	LOC100158450 protein (Fragment) OS=Xenopus laevis GN=LOC100158450 PE=2 SV=1	1310	0	0	1	0	1	0	0	1	0	0	0	0
tr|Q5G8Z4|Q5G8Z4_XENLA	522	C	4	0	tcof1	Treacle OS=Xenopus laevis GN=tcof1 PE=2 SV=1	1476	0	0	1	0	2	0	0	0	1	0	0	0
tr|Q32NG7|Q32NG7_XENLA	523	C	1	0	pick1	MGC131295 protein OS=Xenopus laevis GN=pick1 PE=2 SV=1	405	0	0	0	0	0	0	0	0	0	0	0	1
sp|Q66J69|RNG2A_XENLA	524	C	0	1	rnf2-a	E3 ubiquitin-protein ligase RING2-A OS=Xenopus laevis GN=rnf2-a PE=2 SV=1	344	0	1	0	0	0	0	0	0	0	0	0	0
sp|Q7ZWM8|RNG2B_XENLA	524		0	0	rnf2-b	E3 ubiquitin-protein ligase RING2-B OS=Xenopus laevis GN=rnf2-b PE=2 SV=2	343	0	1	0	0	0	0	0	0	0	0	0	0
tr|A9JSS1|A9JSS1_XENLA	524		0	0	rnf2	LOC100127274 protein OS=Xenopus laevis GN=rnf2 PE=2 SV=1	336	0	1	0	0	0	0	0	0	0	0	0	0
tr|Q66L13|Q66L13_XENLA	525	C	0	1	dnajc8	MGC85251 protein OS=Xenopus laevis GN=dnajc8 PE=2 SV=1	250	0	0	1	0	0	0	0	0	0	0	0	0
tr|Q4QQR5|Q4QQR5_XENLA	525		0	0	LOC733284	LOC733284 protein (Fragment) OS=Xenopus laevis GN=LOC733284 PE=2 SV=1	241	0	0	1	0	0	0	0	0	0	0	0	0
tr|A0JMX7|A0JMX7_XENLA	525		0	0	LOC733284	LOC733284 protein (Fragment) OS=Xenopus laevis GN=LOC733284 PE=2 SV=1	248	0	0	1	0	0	0	0	0	0	0	0	0
tr|Q8AVH9|Q8AVH9_XENLA	526	C	0	2	ppp2ca	Serine/threonine-protein phosphatase OS=Xenopus laevis GN=ppp2ca PE=2 SV=1	309	0	0	1	0	0	0	0	1	0	0	0	0
tr|Q92140|Q92140_XENLA	526		0	0	ppp2cb	Serine/threonine-protein phosphatase OS=Xenopus laevis GN=ppp2cb PE=2 SV=1	309	0	0	1	0	0	0	0	1	0	0	0	0
tr|Q52KX4|Q52KX4_XENLA	527	C	1	2	MGC115008	MGC115008 protein OS=Xenopus laevis GN=MGC115008 PE=2 SV=1	873	0	1	0	0	2	0	0	0	0	0	0	0
tr|Q6P7F7|Q6P7F7_XENLA	527		0	0	smtn	MGC68765 protein OS=Xenopus laevis GN=smtn PE=2 SV=1	864	0	1	0	0	1	0	0	0	0	0	0	0
tr|Q4V7G8|Q4V7G8_XENLA	528	C	1	0	sirt3.2	MGC115727 protein OS=Xenopus laevis GN=sirt3.2 PE=2 SV=1	350	0	0	1	0	0	0	0	0	0	0	0	0
sp|P55863|SOX3A_XENLA	529	C	6	0	sox3-a	Transcription factor Sox-3-A OS=Xenopus laevis GN=sox3-a PE=1 SV=1	309	0	1	1	0	2	0	0	1	1	0	0	0
sp|Q6DFC6|WDR75_XENLA	530	C	2	0	wdr75	WD repeat-containing protein 75 OS=Xenopus laevis GN=wdr75 PE=2 SV=1	832	0	0	1	0	1	0	0	0	0	0	0	0
tr|Q6PHL7|Q6PHL7_XENLA	531	C	1	0	tceb2	Tceb2-prov protein OS=Xenopus laevis GN=tceb2 PE=2 SV=1	119	0	0	0	0	0	0	0	0	1	0	0	0
tr|Q6NRD9|Q6NRD9_XENLA	532	C	5	0	sp1	MGC83896 protein OS=Xenopus laevis GN=sp1 PE=2 SV=1	723	0	0	1	0	1	0	0	1	1	0	1	0
sp|Q04870|T2FA_XENLA	533	C	0	15	gtf2f1	General transcription factor IIF subunit 1 OS=Xenopus laevis GN=gtf2f1 PE=2 SV=1	524	0	2	3	0	2	2	0	2	2	0	1	1
tr|Q8JGL7|Q8JGL7_XENLA	533		0	0		RAP74 subunit of transcription factor IIF OS=Xenopus laevis PE=2 SV=1	524	0	2	3	0	2	2	0	2	2	0	1	1
tr|Q7ZYS6|Q7ZYS6_XENLA	533		0	0	LOC398325	LOC398325 protein (Fragment) OS=Xenopus laevis GN=LOC398325 PE=2 SV=1	343	0	2	2	0	2	2	0	1	1	0	1	1
tr|Q6DCF1|Q6DCF1_XENLA	534	C	0	1		Kinesin-like protein (Fragment) OS=Xenopus laevis PE=2 SV=1	447	0	0	1	0	0	0	0	0	0	0	0	0
tr|O93478|O93478_XENLA	534		0	0	kif3b	Kinesin-like protein OS=Xenopus laevis GN=kif3b PE=2 SV=1	744	0	0	1	0	0	0	0	0	0	0	0	0
tr|Q98TI1|Q98TI1_XENLA	534		0	0	kif3a	Kinesin-like protein OS=Xenopus laevis GN=kif3a PE=2 SV=1	699	0	0	1	0	0	0	0	0	0	0	0	0
tr|Q6DCZ1|Q6DCZ1_XENLA	535	C	4	0	pola2	DNA polymerase alpha subunit B OS=Xenopus laevis GN=pola2 PE=2 SV=1	598	0	0	0	0	1	0	0	2	0	0	0	1
tr|A4FVE4|A4FVE4_XENLA	536	C	2	0	LOC100049128	LOC100049128 protein OS=Xenopus laevis GN=LOC100049128 PE=2 SV=1	163	0	0	0	0	0	1	0	0	0	0	1	0
tr|A1L1C4|A1L1C4_XENLA	537	C	1	0	siva1	LOC100037065 protein OS=Xenopus laevis GN=siva1 PE=2 SV=1	163	0	0	1	0	0	0	0	0	0	0	0	0
sp|Q7SZ22|SUMO3_XENLA	538	C	12	0	sumo3	Small ubiquitin-related modifier 3 OS=Xenopus laevis GN=sumo3 PE=3 SV=1	94	0	1	4	1	4	3	1	4	4	1	4	2
sp|Q7ZTK7|SMO2A_XENLA	538	C	0	31	sumo2-a	Small ubiquitin-related modifier 2-A OS=Xenopus laevis GN=sumo2-a PE=3 SV=1	95	0	2	4	1	4	4	1	4	5	1	3	2
sp|Q6GPW2|SMO2B_XENLA	538		0	0	sumo2-b	Small ubiquitin-related modifier 2-B OS=Xenopus laevis GN=sumo2-b PE=3 SV=1	95	0	2	4	1	4	4	1	4	5	1	3	2
sp|Q5U4U4|DONS_XENLA	539	C	1	0	donson	Protein downstream neighbor of son homolog OS=Xenopus laevis GN=donson PE=2 SV=1	579	0	0	0	0	0	0	0	0	1	0	0	0
tr|Q3KQ12|Q3KQ12_XENLA	540	C	10	0	LOC733345	LOC733345 protein (Fragment) OS=Xenopus laevis GN=LOC733345 PE=2 SV=1	260	0	1	1	1	1	1	1	1	1	0	1	1
sp|Q7SZ78|THOC7_XENLA	541	C	1	0	thoc7	THO complex subunit 7 homolog OS=Xenopus laevis GN=thoc7 PE=2 SV=1	201	0	0	1	0	0	0	0	0	0	0	0	0
tr|Q6GNR4|Q6GNR4_XENLA	542	C	1	0	cltc	Clathrin heavy chain OS=Xenopus laevis GN=cltc PE=2 SV=1	1675	0	0	1	0	0	0	0	0	0	0	0	0
sp|P49739|MCM3M_XENLA	543	C	0	1	mmcm3	Maternal DNA replication licensing factor mcm3 OS=Xenopus laevis GN=mmcm3 PE=1 SV=2	807	0	0	1	0	0	0	0	0	0	0	0	0
sp|Q7ZXZ0|MCM3Z_XENLA	543		0	0	zmcm3	Zygotic DNA replication licensing factor mcm3 OS=Xenopus laevis GN=zmcm3 PE=1 SV=1	806	0	0	1	0	0	0	0	0	0	0	0	0
tr|A0A090B2N7|A0A090B2N7_XENLA	543		0	0	mcm3	DNA helicase OS=Xenopus laevis GN=mcm3 PE=2 SV=1	807	0	0	1	0	0	0	0	0	0	0	0	0
tr|A0A090AX62|A0A090AX62_XENLA	543		0	0	Mcm3	DNA helicase OS=Xenopus laevis GN=Mcm3 PE=2 SV=1	806	0	0	1	0	0	0	0	0	0	0	0	0
tr|Q58M11|Q58M11_XENLA	544	C	0	2		DNA polymerase eta OS=Xenopus laevis PE=2 SV=1	684	0	0	0	0	0	0	0	1	1	0	0	0
tr|Q6DCL9|Q6DCL9_XENLA	544		0	0	polh	Polh-prov protein OS=Xenopus laevis GN=polh PE=2 SV=1	684	0	0	0	0	0	0	0	1	1	0	0	0
sp|A8E604|RS3AB_XENLA	545	C	0	8	rps3a-b	40S ribosomal protein S3a-B OS=Xenopus laevis GN=rps3a-b PE=2 SV=1	264	0	1	1	0	1	0	0	1	1	0	2	1
sp|Q801S3|RS3AA_XENLA	545		0	0	rps3a-a	40S ribosomal protein S3a-A OS=Xenopus laevis GN=rps3a-a PE=2 SV=3	264	0	1	1	0	1	0	0	1	1	0	2	1
tr|Q6PA46|Q6PA46_XENLA	546	C	1	0	polr2b	MGC68569 protein OS=Xenopus laevis GN=polr2b PE=2 SV=1	949	0	0	1	0	0	0	0	0	0	0	0	0
sp|Q68FJ6|PK1IP_XENLA	547		0	0	pak1ip1	p21-activated protein kinase-interacting protein 1-like OS=Xenopus laevis GN=pak1ip1 PE=2 SV=1	363	0	0	0	0	1	0	0	0	0	0	0	0
tr|Q4QR17|Q4QR17_XENLA	547	C	1	1	MGC114939	MGC114939 protein OS=Xenopus laevis GN=MGC114939 PE=2 SV=1	369	0	0	1	0	1	0	0	0	0	0	0	0
tr|Q6PGS8|Q6PGS8_XENLA	548	C	2	0	acad8	MGC64378 protein OS=Xenopus laevis GN=acad8 PE=2 SV=1	414	0	0	1	0	0	0	0	0	1	0	0	0
sp|P51893|SAHHA_XENLA	549	C	0	4	ahcy-a	Adenosylhomocysteinase A OS=Xenopus laevis GN=ahcy-a PE=2 SV=1	433	1	0	0	0	1	0	1	0	0	1	0	0
sp|O93477|SAHHB_XENLA	549		0	0	ahcy-b	Adenosylhomocysteinase B OS=Xenopus laevis GN=ahcy-b PE=2 SV=1	433	1	0	0	0	1	0	1	0	0	1	0	0
sp|Q5XH61|BCL7A_XENLA	550	C	4	6	bcl7a	B-cell CLL/lymphoma 7 protein family member A OS=Xenopus laevis GN=bcl7a PE=2 SV=1	231	0	1	2	0	2	0	0	2	2	0	1	0
tr|Q0IHC1|Q0IHC1_XENLA	550		0	0	bcl7c	MGC154460 protein OS=Xenopus laevis GN=bcl7c PE=2 SV=1	209	0	1	1	0	1	0	0	1	1	0	1	0
sp|Q90XB8|NOD4B_XENLA	551	C	0	1	nodal4-b	Nodal homolog 4-B (Fragment) OS=Xenopus laevis GN=nodal4-b PE=2 SV=1	352	0	0	1	0	0	0	0	0	0	0	0	0
sp|O13048|NOD4A_XENLA	551		0	0	nodal4-a	Nodal homolog 4-A OS=Xenopus laevis GN=nodal4-a PE=2 SV=1	402	0	0	1	0	0	0	0	0	0	0	0	0
tr|Q6GQK3|Q6GQK3_XENLA	552	C	5	0	dpy30	MGC79089 protein OS=Xenopus laevis GN=dpy30 PE=2 SV=1	99	0	1	1	0	1	1	0	0	0	0	0	1
tr|Q6AZI8|Q6AZI8_XENLA	553	C	9	0	des.1	Des-prov protein OS=Xenopus laevis GN=des.1 PE=2 SV=1	458	0	1	0	1	1	1	1	1	1	1	0	1
sp|P02362|RS7_XENLA	554	C	1	0	rps7	40S ribosomal protein S7 OS=Xenopus laevis GN=rps7 PE=2 SV=2	194	0	0	0	0	0	0	1	0	0	0	0	0
tr|Q6INQ9|Q6INQ9_XENLA	555	C	1	0	rad54b	MGC81308 protein OS=Xenopus laevis GN=rad54b PE=2 SV=1	895	0	0	1	0	0	0	0	0	0	0	0	0
tr|Q5U253|Q5U253_XENLA	556	C	2	0	pcmt1	Protein-L-isoaspartate O-methyltransferase OS=Xenopus laevis GN=pcmt1 PE=2 SV=1	228	0	0	0	0	0	1	0	1	0	0	0	0
tr|Q6DDH1|Q6DDH1_XENLA	557	C	1	0	nrf1	MGC83958 protein OS=Xenopus laevis GN=nrf1 PE=2 SV=1	523	0	0	0	0	1	0	0	0	0	0	0	0
tr|Q6NUA8|Q6NUA8_XENLA	558	C	0	1	MGC81096	MGC81096 protein OS=Xenopus laevis GN=MGC81096 PE=2 SV=1	194	0	0	1	0	0	0	0	0	0	0	0	0
tr|Q5I002|Q5I002_XENLA	558		0	0	LOC496304	LOC496304 protein OS=Xenopus laevis GN=LOC496304 PE=2 SV=1	164	0	0	1	0	0	0	0	0	0	0	0	0
tr|Q32NK0|Q32NK0_XENLA	559	C	3	0	myef2	MGC131089 protein OS=Xenopus laevis GN=myef2 PE=2 SV=1	673	0	0	1	0	0	0	0	1	1	0	0	0
tr|Q6GMZ1|Q6GMZ1_XENLA	560	C	1	0	rtca	MGC84552 protein OS=Xenopus laevis GN=rtca PE=2 SV=1	351	0	0	1	0	0	0	0	0	0	0	0	0
sp|P50886|RL22_XENLA	561	C	1	0	rpl22	60S ribosomal protein L22 OS=Xenopus laevis GN=rpl22 PE=2 SV=2	128	0	1	0	0	0	0	0	0	0	0	0	0
tr|Q5XG28|Q5XG28_XENLA	562	C	3	0	senp3	LOC495227 protein OS=Xenopus laevis GN=senp3 PE=2 SV=1	459	0	0	2	0	0	0	0	0	0	0	1	0
tr|A7M6H8|A7M6H8_XENLA	563	C	1	0	fry	Furry homolog OS=Xenopus laevis GN=fry PE=2 SV=1	3010	0	0	0	0	1	0	0	0	0	0	0	0
tr|Q8UVY7|Q8UVY7_XENLA	564	C	1	0	polr1a	DNA-directed RNA polymerase OS=Xenopus laevis GN=polr1a PE=2 SV=1	1730	0	0	1	0	0	0	0	0	0	0	0	0
tr|Q6INF7|Q6INF7_XENLA	565	C	1	0	csnk2a2	MGC83125 protein OS=Xenopus laevis GN=csnk2a2 PE=2 SV=1	349	0	0	0	0	0	1	0	0	0	0	0	0
tr|Q4FZQ7|Q4FZQ7_XENLA	566	C	9	0	rpl35	MGC116425 protein OS=Xenopus laevis GN=rpl35 PE=2 SV=1	123	0	1	1	1	1	1	0	1	1	0	1	1
tr|Q5U251|Q5U251_XENLA	567	C	1	0	ubox5	LOC495687 protein OS=Xenopus laevis GN=ubox5 PE=2 SV=1	540	0	0	0	0	1	0	0	0	0	0	0	0
tr|A9JTI5|A9JTI5_XENLA	568	C	0	6	LOC100037086	LOC100037086 protein OS=Xenopus laevis GN=LOC100037086 PE=2 SV=1	266	0	1	1	1	2	0	0	1	0	0	0	0
tr|A2VDA5|A2VDA5_XENLA	568		0	0		Uncharacterized protein OS=Xenopus laevis PE=2 SV=1	266	0	1	1	1	2	0	0	1	0	0	0	0
tr|A2BDA8|A2BDA8_XENLA	568		0	0	LOC100037086	LOC100037086 protein (Fragment) OS=Xenopus laevis GN=LOC100037086 PE=2 SV=1	263	0	1	1	1	2	0	0	1	0	0	0	0
tr|Q6GQB2|Q6GQB2_XENLA	568		0	0	rpl7a	MGC80199 protein OS=Xenopus laevis GN=rpl7a PE=2 SV=1	266	0	1	1	1	2	0	0	1	0	0	0	0
tr|Q6EE38|Q6EE38_XENLA	568		0	0		Ribosomal protein L7a (Fragment) OS=Xenopus laevis PE=2 SV=1	238	0	1	1	1	2	0	0	1	0	0	0	0
sp|Q91858|TAF12_XENLA	569	C	1	0	taf12	Transcription initiation factor TFIID subunit 12 OS=Xenopus laevis GN=taf12 PE=2 SV=1	164	0	0	1	0	0	0	0	0	0	0	0	0
sp|Q7ZX31|ING3_XENLA	570	C	1	0	ing3	Inhibitor of growth protein 3 OS=Xenopus laevis GN=ing3 PE=2 SV=1	416	0	0	1	0	0	0	0	0	0	0	0	0
tr|Q7ZX77|Q7ZX77_XENLA	571	C	0	4	hspa9	Hspa9b protein OS=Xenopus laevis GN=hspa9 PE=2 SV=1	670	0	0	0	1	0	0	1	1	0	0	1	0
tr|Q7ZX34|Q7ZX34_XENLA	571		0	0	hspa9	MGC52616 protein OS=Xenopus laevis GN=hspa9 PE=2 SV=1	670	0	0	0	1	0	0	1	1	0	0	1	0
sp|P79955|CTK2_XENLA	572	C	0	2		Carboxy-terminal kinesin 2 OS=Xenopus laevis PE=2 SV=1	643	0	0	1	0	0	0	0	1	0	0	0	0
tr|Q5XGK6|Q5XGK6_XENLA	572		0	0	ctk2-A	Kinesin-like protein OS=Xenopus laevis GN=ctk2-A PE=2 SV=1	643	0	0	1	0	0	0	0	1	0	0	0	0
tr|Q7ZXW4|Q7ZXW4_XENLA	573	C	7	0	prpf19	Nmp200-prov protein OS=Xenopus laevis GN=prpf19 PE=2 SV=1	504	0	1	1	0	1	1	0	1	1	0	1	0
tr|Q91803|Q91803_XENLA	574	C	5	0	nolc1	Nucleolar phosphoprotein OS=Xenopus laevis GN=nolc1 PE=2 SV=1	990	0	1	1	0	0	0	0	1	1	0	1	0
sp|Q7ZWN5|TPIS_XENLA	575	C	4	0	tpi1	Triosephosphate isomerase OS=Xenopus laevis GN=tpi1 PE=2 SV=1	248	1	0	0	1	0	0	1	0	0	0	0	1
tr|Q7ZTM1|Q7ZTM1_XENLA	576	C	2	0	ppil2	Ppil2 protein OS=Xenopus laevis GN=ppil2 PE=2 SV=1	521	0	0	1	0	0	0	0	1	0	0	0	0
tr|Q5HZ86|Q5HZ86_XENLA	577	C	7	0	eif4e	MGC85107 protein OS=Xenopus laevis GN=eif4e PE=2 SV=1	213	0	1	1	0	1	1	0	1	1	0	1	0
tr|Q6PHL5|Q6PHL5_XENLA	578	C	12	0	rpl27	60S ribosomal protein L27 OS=Xenopus laevis GN=rpl27 PE=2 SV=1	136	0	1	2	0	2	0	0	2	3	0	1	1
tr|Q6DDG3|Q6DDG3_XENLA	579	C	2	0	pi4ka	Pik4ca-prov protein OS=Xenopus laevis GN=pi4ka PE=2 SV=1	2061	0	0	1	0	0	0	0	0	1	0	0	0
tr|Q32NM8|Q32NM8_XENLA	580	C	4	0	u2af1	MGC131026 protein OS=Xenopus laevis GN=u2af1 PE=2 SV=1	245	0	0	1	0	1	0	0	1	1	0	0	0
sp|Q03369|RU1C_XENLA	581	C	1	0	snrpc	U1 small nuclear ribonucleoprotein C OS=Xenopus laevis GN=snrpc PE=2 SV=1	159	0	0	0	0	0	0	0	0	1	0	0	0
##tr|Q7ZY37|Q7ZY37_XENLA	582	C	5	0	##aco1	##Aconitate hydratase OS=Xenopus laevis GN=aco1 PE=2 SV=1	891	0	0	0	0	1	0	1	0	1	0	1	1
sp|Q4U0Y4|NPL1A_XENLA	583	C	1	0	nap1l1-a	Nucleosome assembly protein 1-like 1-A OS=Xenopus laevis GN=nap1l1-a PE=1 SV=1	392	0	0	1	0	0	0	0	0	0	0	0	0
##sp|Q32N32|CASC4_XENLA	584	C	1	0	##casc4	##Protein casc4 OS=Xenopus laevis GN=casc4 PE=2 SV=1	385	0	0	1	0	0	0	0	0	0	0	0	0
sp|Q6GQ26|SRBP2_XENLA	585	C	2	0	srebf2	Sterol regulatory element-binding protein 2 OS=Xenopus laevis GN=srebf2 PE=2 SV=1	1088	0	0	0	0	0	1	0	1	0	0	0	0
tr|Q7ZY48|Q7ZY48_XENLA	586	C	6	0	rpl13a	Rpl13a-prov protein OS=Xenopus laevis GN=rpl13a PE=2 SV=1	231	0	1	1	0	1	0	0	0	1	0	1	1
sp|Q5FWP8|PCID2_XENLA	587	C	2	0	pcid2	PCI domain-containing protein 2 OS=Xenopus laevis GN=pcid2 PE=2 SV=1	399	0	0	1	0	0	0	0	0	1	0	0	0
sp|Q4KLT6|FL2D_XENLA	588	C	1	0	wtap	Pre-mRNA-splicing regulator WTAP OS=Xenopus laevis GN=wtap PE=2 SV=1	393	0	0	1	0	0	0	0	0	0	0	0	0
tr|Q6DJQ0|Q6DJQ0_XENLA	589	C	3	0		Uncharacterized protein OS=Xenopus laevis PE=2 SV=1	145	0	0	1	0	1	0	0	1	0	0	0	0
sp|Q9YHZ6|CDC45_XENLA	590	C	0	1	cdc45	Cell division control protein 45 homolog OS=Xenopus laevis GN=cdc45 PE=1 SV=2	567	0	0	1	0	0	0	0	0	0	0	0	0
tr|Q6AZM5|Q6AZM5_XENLA	590		0	0	cdc45l-prov	Cdc45l-prov protein OS=Xenopus laevis GN=cdc45l-prov PE=2 SV=1	567	0	0	1	0	0	0	0	0	0	0	0	0
tr|Q6DJF7|Q6DJF7_XENLA	591	C	9	0	rpl6	60S ribosomal protein L6 OS=Xenopus laevis GN=rpl6 PE=2 SV=1	258	0	1	1	0	1	1	1	1	1	1	0	1
tr|Q6AZS3|Q6AZS3_XENLA	592	C	2	0	kdm6a	Uty-prov protein OS=Xenopus laevis GN=kdm6a PE=2 SV=1	1455	0	0	0	0	0	0	0	0	1	0	1	0
