# Supplementary figures and images for: Crosstalk between repair pathways elicits double-strand breaks in alkylated DNA and implications for the action of temozolomide
Source: eLife journal article supplement (doi:10.7554/elife.69544), 2021-07-08

A.

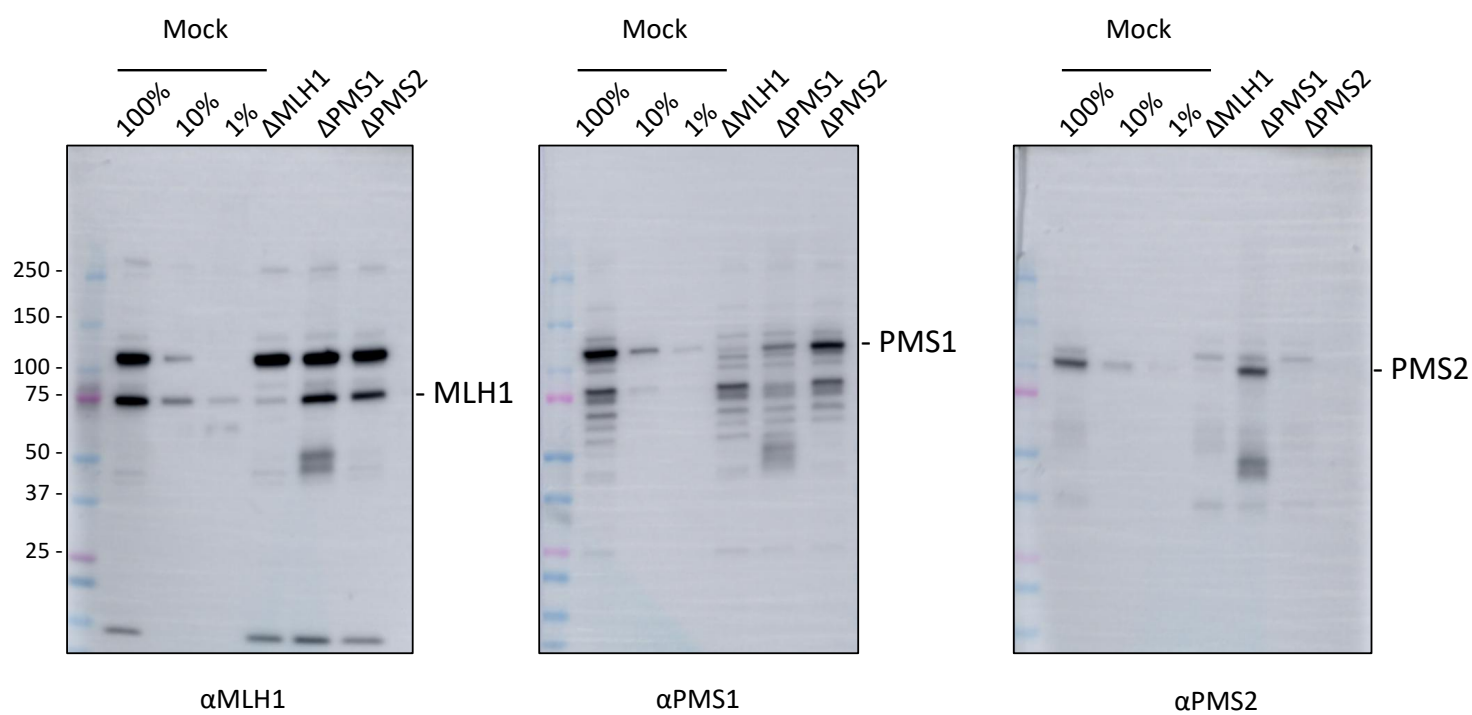

B.

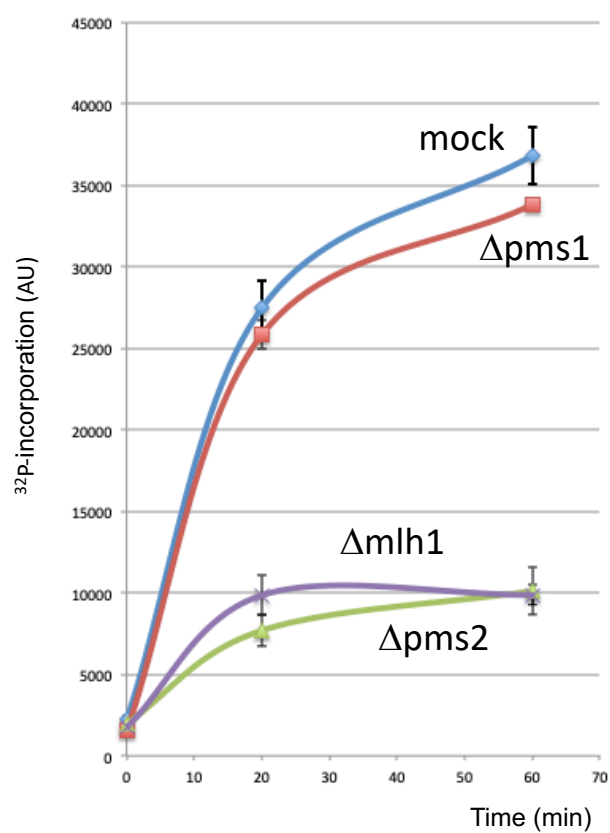

C.

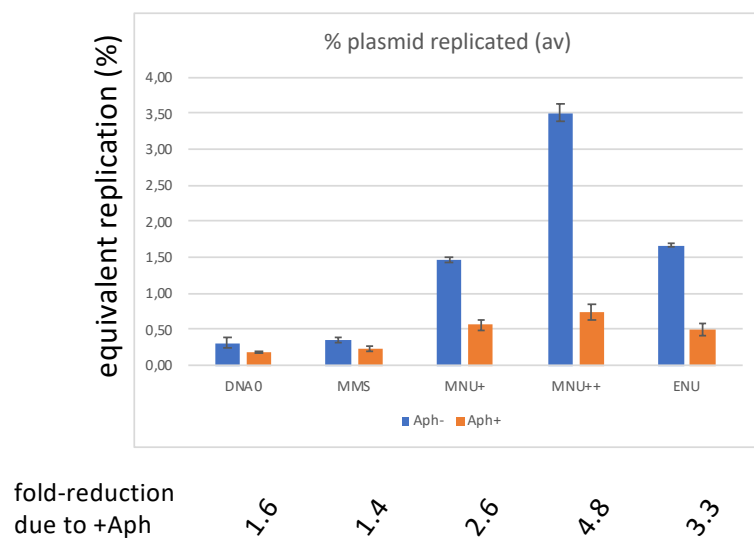

Figure 2-figure supplement 1

Supplement: supp [file elife_poa_e69544_Figure_2_figure_supplement_1.pdf › elife_poa_e69544_Figure_2_figure_supplement_1.pdf]

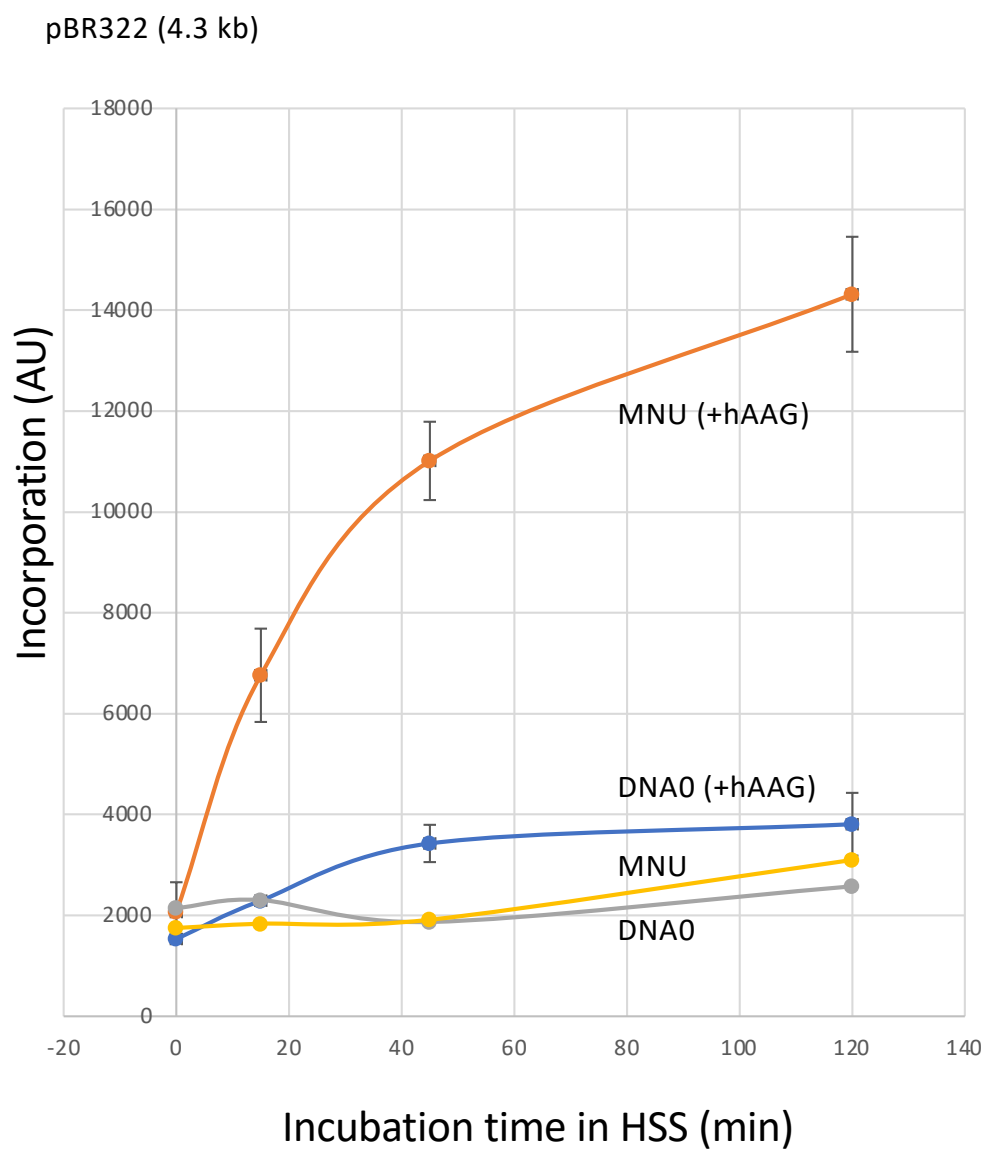

Figure 2-figure supplement 2

Supplement: supp [file elife_poa_e69544_Figure_2_figure_supplement_2.pdf › elife_poa_e69544_Figure_2_figure_supplement_2.pdf]

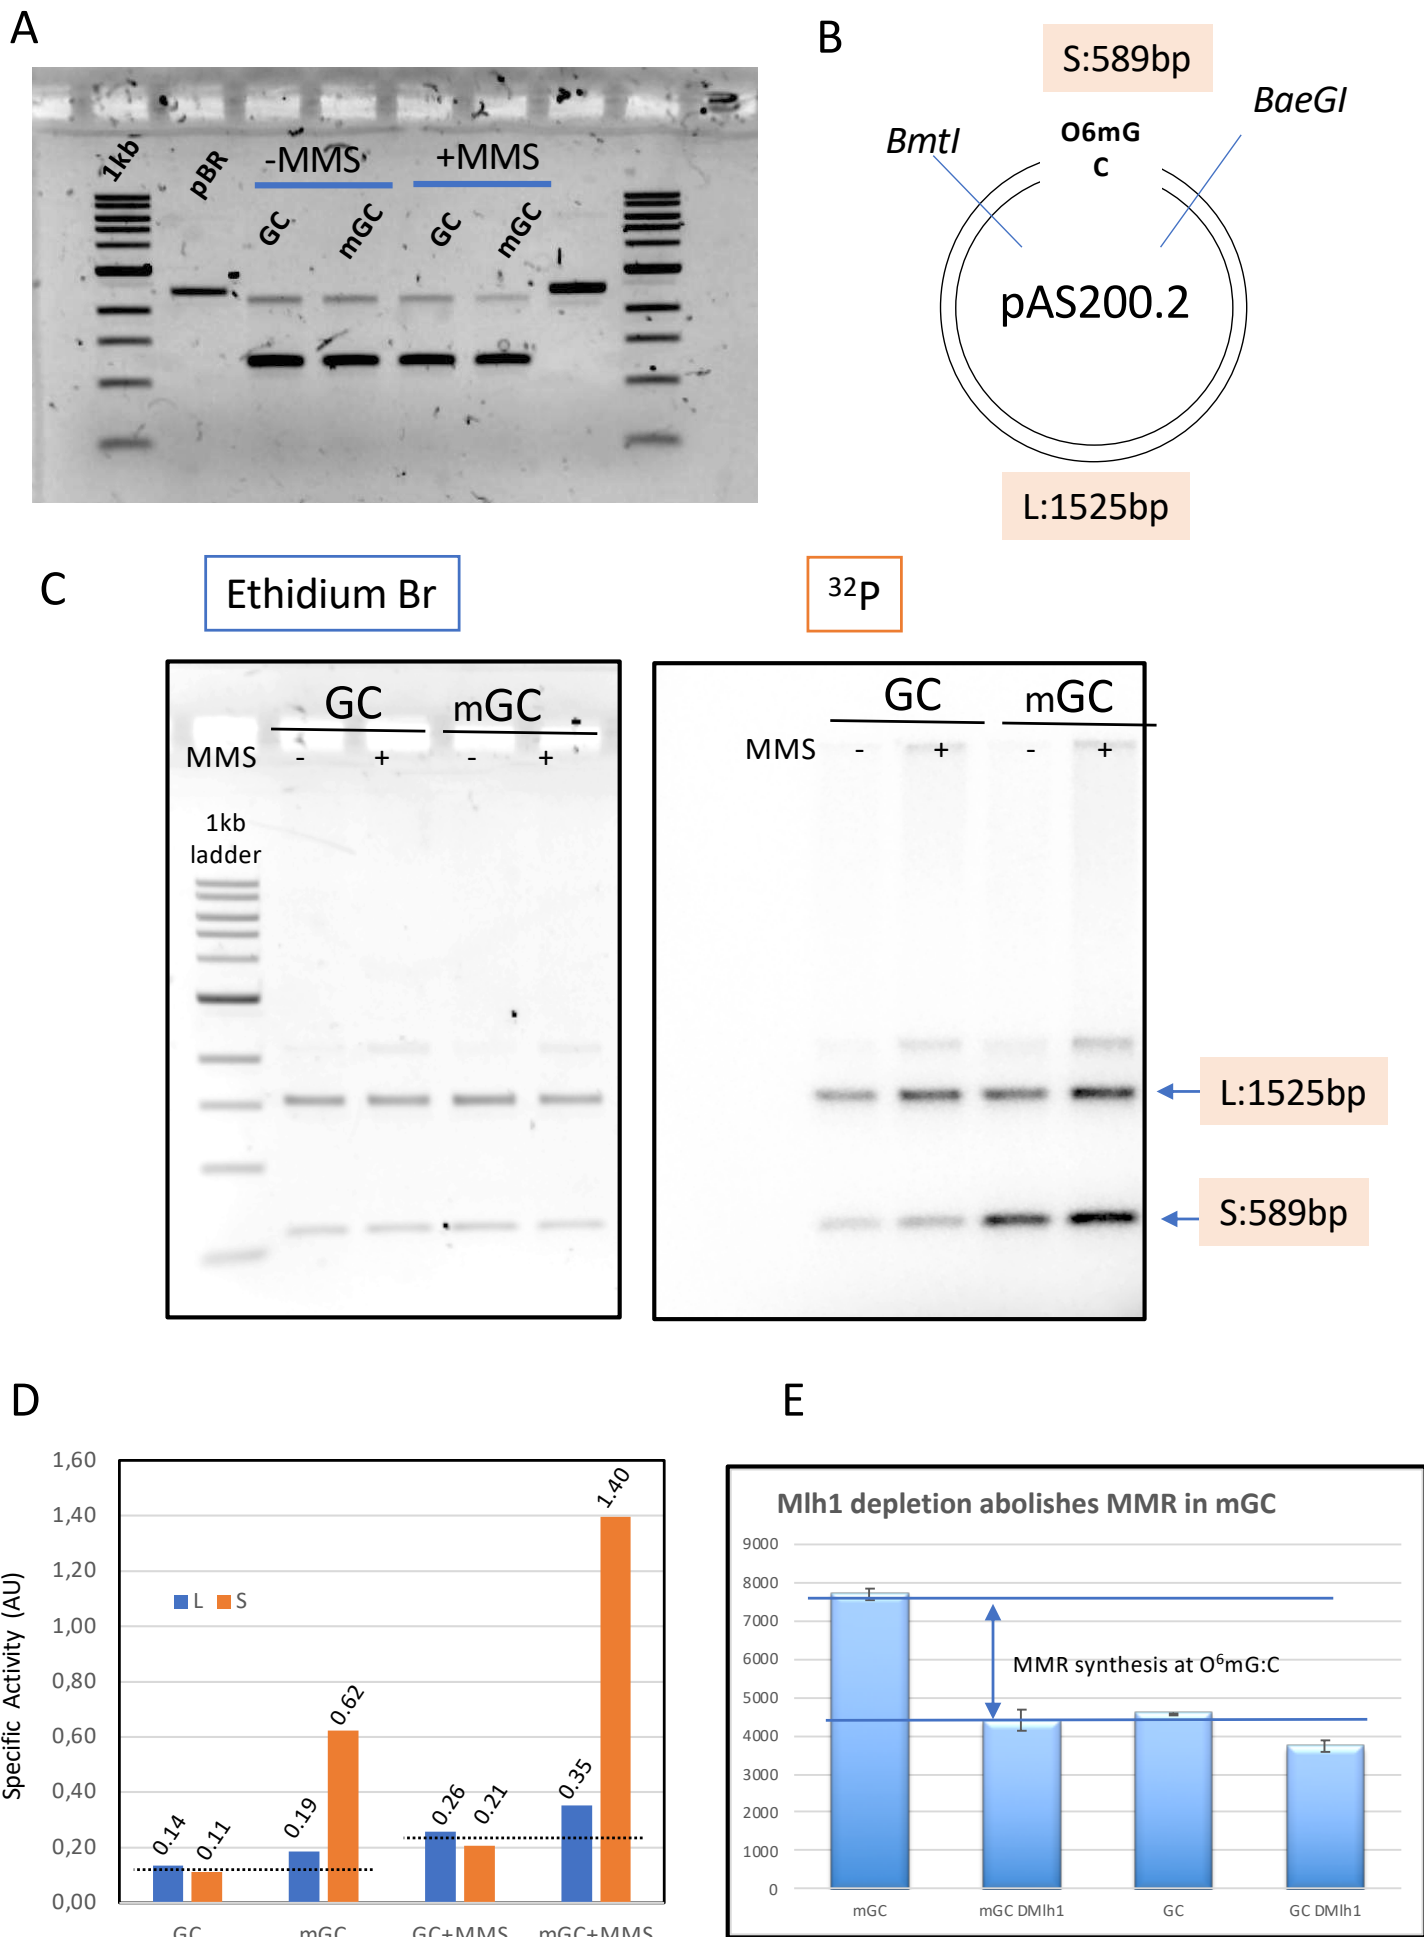

Figure 3-figure supplement 1

Supplement: supp [file elife_poa_e69544_Figure_3_figure_supplement_1.pdf › elife_poa_e69544_Figure_3_figure_supplement_1.pdf]

pEL97 (11.3 kb)

A

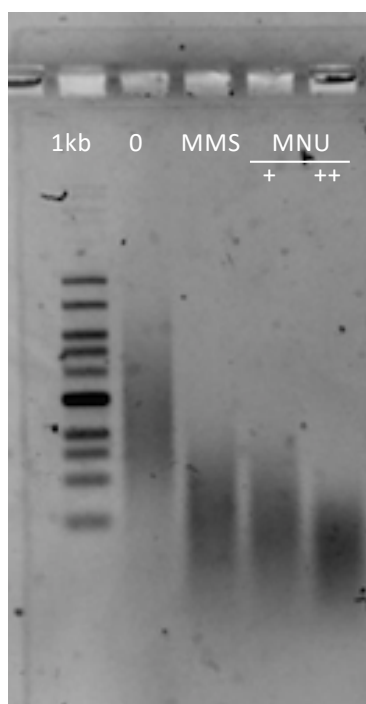

B

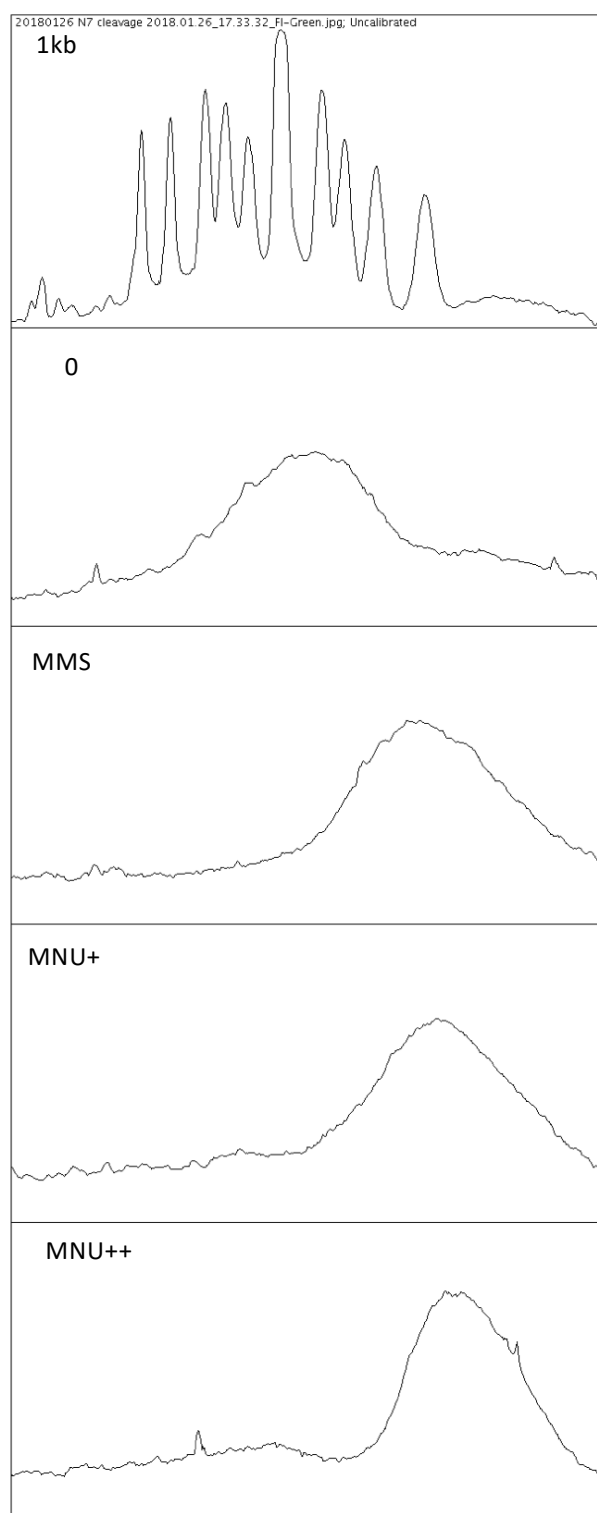

C

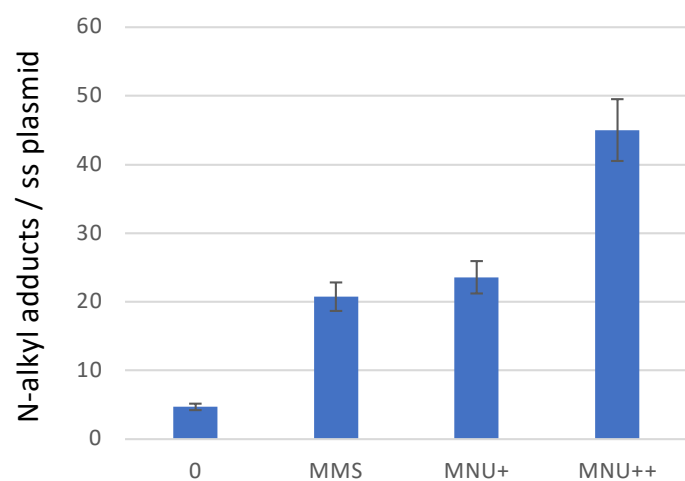

Figure 4-figure supplement 1

Supplement: supp [file elife_poa_e69544_Figure_4_figure_supplement_1.pdf › elife_poa_e69544_Figure_4_figure_supplement_1.pdf]

pEL97 (11.3 kb)

A

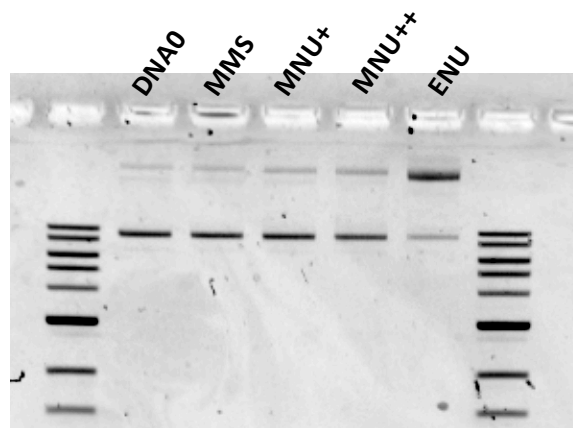

B

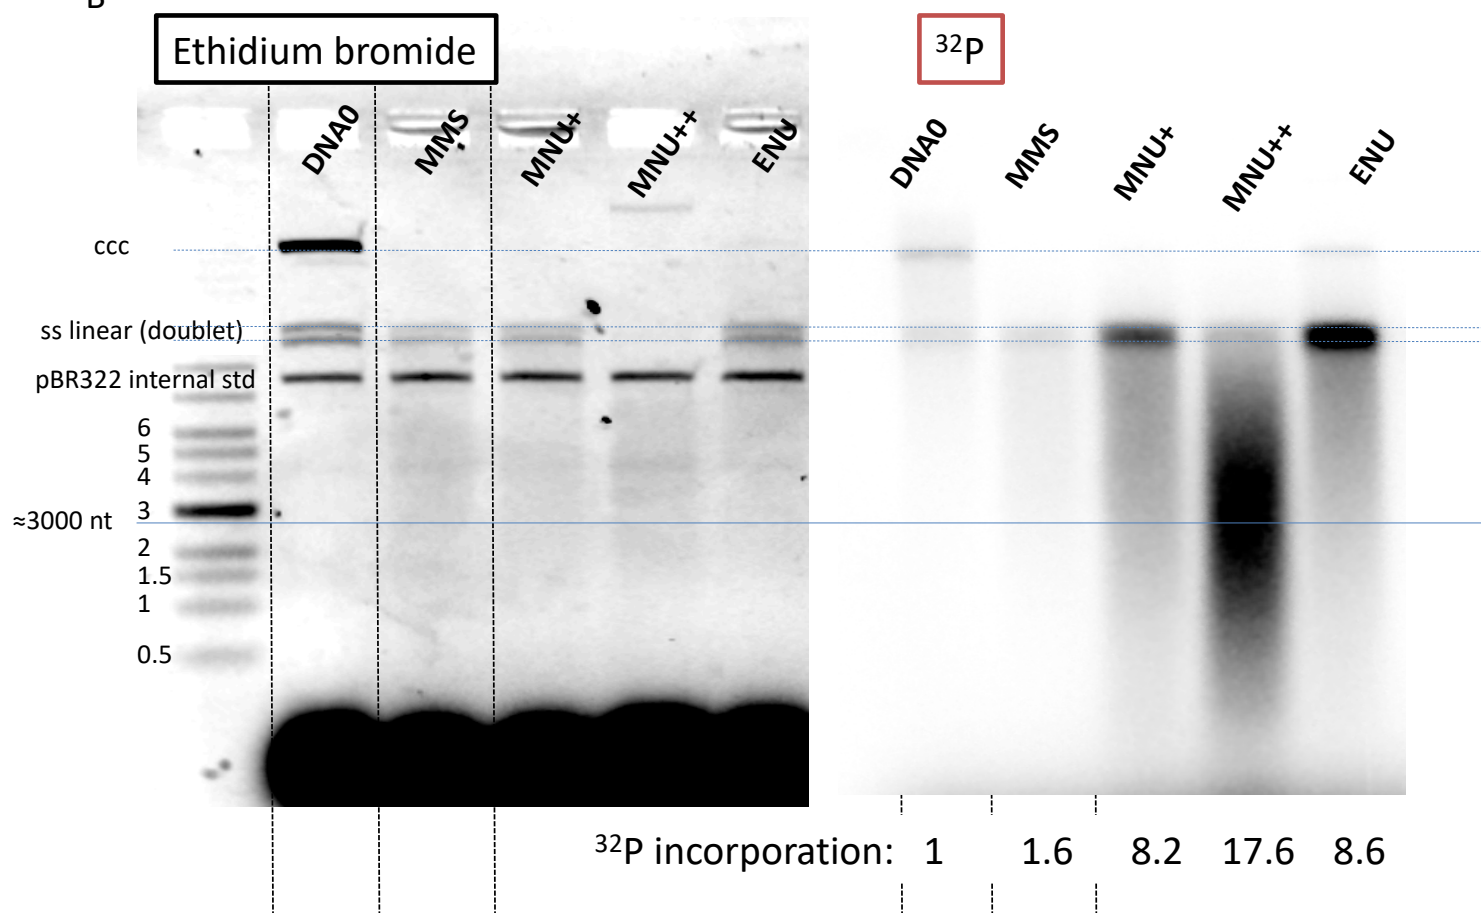

Figure 4-figure supplement 2

Supplement: supp [file elife_poa_e69544_Figure_4_figure_supplement_2.pdf › elife_poa_e69544_Figure_4_figure_supplement_2.pdf]
